# Supplementary material for: Gut microbiota response to Enterocytozoon bieneusi infection: enhanced vitamin B and K 2 pathways
Source: Research Square preprint supplement (doi:10.21203/rs.3.rs-7835059/v1), 2025-11-26
Supplement: Supplementary file 1 [file c4721118731314895399fb53.xlsx]

## Sheet: Supplementary Table 1
Supplementary Table 1. Summary of 9,929 representative genomes, including their sources, quality assessment criteria, and key characteristics.
Representive genomes ID	Completeness	Contamination	Completeness_Model_Used	Translation_Table_Used	Coding_Density	Contig_N50	Average_Gene_Length	Genome_Size	GC_Content	Total_Coding_Sequences	Additional_Notes	contigs	genomeLen	gap	aveLen	N50	N90	maxlen	minlen	GC
BSTS1.bin.10	84.36	4.68	Neural Network (Specific Model)	11	0.924	9229	320.195	2141372	0.51	2063	None	298	2141372	0	7185.81	9229	3585	32645	2002	51.14
BSTS1.bin.101	93.02	0.86	Gradient Boost (General Model)	11	0.891	32203	320.206	2180027	0.62	2025	None	92	2180027	0	23696	32203	12547	133549	2042	62.23
BSTS1.bin.106	85.4	0.13	Neural Network (Specific Model)	11	0.896	17751	296.156	2272757	0.48	2295	None	169	2272757	0	13448.3	17751	6398	91463	2013	48.5
BSTS1.bin.108	88.26	4.07	Gradient Boost (General Model)	11	0.901	31079	321.041	1615697	0.4	1513	None	74	1615697	0	21833.7	31079	12600	82162	2160	39.95
BSTS1.bin.113	61.43	0.42	Neural Network (Specific Model)	11	0.854	4363	322.364	1554850	0.59	1375	None	379	1554850	0	4102.51	4363	2497	13896	2005	59.27
BSTS1.bin.114	82.82	0.62	Neural Network (Specific Model)	11	0.904	63105	375.394	2236874	0.52	1798	None	52	2236874	0	43016.8	63105	22987	124203	4003	52.01
BSTS1.bin.115	77.23	2.5	Gradient Boost (General Model)	11	0.892	6368	296.681	1925162	0.62	1933	None	360	1925162	0	5347.67	6368	2911	24905	2007	61.53
BSTS1.bin.120	87.16	1.81	Neural Network (Specific Model)	11	0.922	14587	336.442	2319412	0.54	2122	None	218	2319412	0	10639.5	14587	5586	49680	2068	53.81
BSTS1.bin.122	63.66	1.76	Neural Network (Specific Model)	11	0.88	4060	270.912	1334336	0.48	1448	None	340	1334336	0	3924.52	4060	2364	12750	2005	47.71
BSTS1.bin.124	58.97	0.2	Neural Network (Specific Model)	11	0.894	6708	313.33	1513953	0.47	1443	None	264	1513953	0	5734.67	6708	3064	21771	2023	47.21
BSTS1.bin.125	99.51	0.46	Neural Network (Specific Model)	11	0.912	40476	363.305	2920899	0.52	2447	None	93	2920899	0	31407.5	40476	17149	108131	2473	51.7
BSTS1.bin.126	75.58	0.22	Gradient Boost (General Model)	11	0.861	8871	295.143	1461973	0.5	1424	None	189	1461973	0	7735.31	8871	4317	30817	2078	49.72
BSTS1.bin.130	61.38	1.49	Gradient Boost (General Model)	11	0.914	5046	288.56	1151152	0.58	1217	None	262	1151152	0	4393.71	5046	2506	24387	2000	58.11
BSTS1.bin.131	87.98	2.7	Neural Network (Specific Model)	11	0.927	11268	323.877	2108095	0.53	2015	None	259	2108095	0	8139.36	11268	3995	28590	2002	53.31
BSTS1.bin.135	91.29	1.33	Gradient Boost (General Model)	11	0.883	66177	315.361	2064634	0.48	1929	None	56	2064634	0	36868.5	66177	18558	167601	2193	47.6
BSTS1.bin.139	85.94	3.98	Neural Network (Specific Model)	11	0.872	10719	291.965	2863565	0.5	2857	None	367	2863565	0	7802.63	10719	3637	44830	2020	50.08
BSTS1.bin.147	91.51	0.07	Gradient Boost (General Model)	11	0.881	25311	311.64	1353533	0.42	1278	None	105	1353533	0	12890.8	25311	5698	106801	2033	41.8
BSTS1.bin.149	97.23	0	Gradient Boost (General Model)	11	0.929	88184	378.684	1797858	0.55	1473	None	34	1797858	0	52878.2	88184	30417	246970	3160	55.48
BSTS1.bin.150	60.34	0	Neural Network (Specific Model)	11	0.903	187418	357.024	1671210	0.5	1411	None	17	1671210	0	98306.5	187418	40750	399152	19527	49.71
BSTS1.bin.151	60.7	1.63	Neural Network (Specific Model)	11	0.935	59812	369.017	1604672	0.49	1358	None	47	1604672	0	34142	59812	16906	145204	2358	49.42
BSTS1.bin.152	90.75	0.08	Gradient Boost (General Model)	11	0.865	26983	310.851	2007954	0.55	1865	None	113	2007954	0	17769.5	26983	8307	96179	2207	54.84
BSTS1.bin.153	89.74	0.07	Neural Network (Specific Model)	11	0.929	82110	368.951	2076317	0.53	1745	None	29	2076317	0	71597.1	82110	43790	278894	2349	52.8
BSTS1.bin.154	94.7	1.35	Gradient Boost (General Model)	11	0.902	29338	310.245	1548132	0.58	1503	None	77	1548132	0	20105.6	29338	9201	102649	2345	57.73
BSTS1.bin.158	99.27	0.64	Neural Network (Specific Model)	11	0.886	63968	336.101	2025296	0.56	1783	None	46	2025296	0	44028.2	63968	20851	136070	3786	55.75
BSTS1.bin.159	89.12	1.43	Gradient Boost (General Model)	11	0.936	9031	313.144	873031	0.49	872	None	113	873031	0	7725.94	9031	4207	32557	2015	48.87
BSTS1.bin.160	78.39	2.81	Gradient Boost (General Model)	11	0.894	9748	325.107	2050060	0.43	1881	None	264	2050060	0	7765.38	9748	4050	30501	2015	42.94
BSTS1.bin.161	72.06	2.54	Gradient Boost (General Model)	11	0.887	8360	279.242	1692374	0.43	1795	None	283	1692374	0	5980.12	8360	2693	26557	2001	43.02
BSTS1.bin.163	71.53	0.06	Gradient Boost (General Model)	11	0.89	75891	326.705	1333936	0.47	1213	None	26	1333936	0	51305.2	75891	31753	156796	5888	47.24
BSTS1.bin.165	85.55	3.4	Gradient Boost (General Model)	11	0.91	12424	318.157	1365830	0.56	1304	None	158	1365830	0	8644.49	12424	3950	51456	2089	55.86
BSTS1.bin.17	76.52	0.62	Neural Network (Specific Model)	11	0.908	23811	358.928	1772571	0.52	1497	None	110	1772571	0	16114.3	23811	9222	67476	2130	52.47
BSTS1.bin.171	87.68	0.35	Neural Network (Specific Model)	11	0.913	21993	337.53	2759180	0.47	2492	None	184	2759180	0	14995.5	21993	7692	81583	2009	47.2
BSTS1.bin.175	85.22	0.12	Neural Network (Specific Model)	11	0.86	22012	303.026	2358045	0.47	2235	None	171	2358045	0	13789.7	22012	6293	92261	2020	47.25
BSTS1.bin.178	60.72	0.34	Neural Network (Specific Model)	11	0.92	37088	340.625	1641534	0.47	1481	None	76	1641534	0	21599.1	37088	9876	104894	2223	47.1
BSTS1.bin.18	95.37	0.42	Neural Network (Specific Model)	11	0.916	81967	355.63	2038909	0.47	1753	None	42	2038909	0	48545.4	81967	26003	276475	2020	47.04
BSTS1.bin.180	97.37	0.61	Neural Network (Specific Model)	11	0.913	25355	350.634	2238945	0.5	1946	None	135	2238945	0	16584.8	25355	7908	71890	2098	49.72
BSTS1.bin.19	56.72	0.06	Gradient Boost (General Model)	11	0.871	18761	295.118	1503780	0.53	1482	None	121	1503780	0	12427.9	18761	6355	49411	2029	52.81
BSTS1.bin.196	55.46	0.26	Gradient Boost (General Model)	11	0.877	4364	275.248	1325556	0.45	1410	None	322	1325556	0	4116.63	4364	2479	17928	2015	45.33
BSTS1.bin.197	67.3	0.06	Neural Network (Specific Model)	11	0.913	156562	343.822	1977243	0.51	1754	None	22	1977243	0	89874.7	156562	60865	364562	2122	50.64
BSTS1.bin.2	79.45	0.66	Neural Network (Specific Model)	11	0.913	18358	370.429	2267561	0.51	1865	None	182	2267561	0	12459.1	18358	5909	60730	2001	50.83
BSTS1.bin.20	92.94	2.32	Neural Network (Specific Model)	11	0.904	34796	327.369	2431900	0.48	2242	None	110	2431900	0	22108.2	34796	10726	121011	2039	47.94
BSTS1.bin.21	80.78	0.88	Neural Network (Specific Model)	11	0.928	17490	335.813	1868900	0.45	1724	None	141	1868900	0	13254.6	17490	6953	78434	2090	45.15
BSTS1.bin.24	68.89	3.22	Gradient Boost (General Model)	11	0.906	4420	322.186	1673157	0.57	1571	None	412	1673157	0	4061.06	4420	2452	13573	2000	56.97
BSTS1.bin.26	51.1	0	Gradient Boost (General Model)	11	0.877	21756	318.069	877286	0.56	807	None	64	877286	0	13707.6	21756	7034	56737	2172	55.95
BSTS1.bin.3	97.32	0.52	Gradient Boost (General Model)	11	0.919	33600	312.749	1753758	0.6	1720	None	81	1753758	0	21651.3	33600	13624	64378	2167	59.83
BSTS1.bin.34	79.5	1.75	Gradient Boost (General Model)	11	0.914	6443	282.949	1187040	0.51	1281	None	225	1187040	0	5275.73	6443	2754	31679	2008	50.96
BSTS1.bin.35	100	0.84	Gradient Boost (General Model)	11	0.915	51349	345.696	1572280	0.52	1390	None	65	1572280	0	24188.9	51349	10110	152302	2163	52.31
BSTS1.bin.36	70.21	1.5	Gradient Boost (General Model)	11	0.926	4967	287.573	1184123	0.49	1274	None	271	1184123	0	4369.46	4967	2543	17138	2002	49.41
BSTS1.bin.37	84.94	3.74	Neural Network (Specific Model)	11	0.894	17228	327.597	1946549	0.6	1772	None	180	1946549	0	10814.2	17228	4246	70903	2000	59.89
BSTS1.bin.4	58.28	0.03	Neural Network (Specific Model)	11	0.881	73135	373.3	1420984	0.61	1120	None	39	1420984	0	36435.5	73135	16599	151243	3347	60.61
BSTS1.bin.44	66.44	0.67	Gradient Boost (General Model)	11	0.939	5389	321.186	1322687	0.58	1291	None	269	1322687	0	4917.05	5389	2607	38570	2014	57.93
BSTS1.bin.51	83.51	1.46	Gradient Boost (General Model)	11	0.911	7641	309.296	1703111	0.47	1675	None	282	1703111	0	6039.4	7641	3085	23021	2008	47.03
BSTS1.bin.52	88.1	0.08	Neural Network (Specific Model)	11	0.926	67468	343.107	2324105	0.48	2096	None	55	2324105	0	42256.4	67468	23637	127906	2050	47.95
BSTS1.bin.54	99.94	0.05	Neural Network (Specific Model)	11	0.918	44808	351.417	2149345	0.51	1874	None	65	2149345	0	33066.8	44808	15198	101680	2625	50.5
BSTS1.bin.59	82.87	0.66	Gradient Boost (General Model)	11	0.904	22020	313.297	1455520	0.42	1402	None	102	1455520	0	14269.8	22020	7082	79681	2055	41.92
BSTS1.bin.65	80.13	1.14	Neural Network (Specific Model)	11	0.899	24798	335.285	2225857	0.45	1992	None	125	2225857	0	17806.9	24798	9495	71132	2078	45.02
BSTS1.bin.69	81.86	3.06	Neural Network (Specific Model)	11	0.894	8272	316.886	1786160	0.54	1682	None	275	1786160	0	6495.13	8272	3171	42208	2015	53.65
BSTS1.bin.77	75.84	0.03	Neural Network (Specific Model)	11	0.918	17876	332.052	1531947	0.43	1414	None	128	1531947	0	11968.3	17876	5771	75382	2073	42.94
BSTS1.bin.78	67.83	1.05	Gradient Boost (General Model)	11	0.855	4271	266.105	1616771	0.52	1737	None	405	1616771	0	3992.03	4271	2458	13541	2010	52.47
BSTS1.bin.85	61.27	0.15	Gradient Boost (General Model)	11	0.92	8036	299.5	1040007	0.41	1066	None	166	1040007	0	6265.1	8036	2927	33783	2021	40.78
BSTS1.bin.93	78.34	0.73	Gradient Boost (General Model)	11	0.939	6933	330.533	1684417	0.53	1598	None	284	1684417	0	5931.05	6933	2992	30653	2005	53.17
BSTS1.bin.94	99.19	0.86	Neural Network (Specific Model)	11	0.89	37536	359.882	2435089	0.52	2010	None	108	2435089	0	22547.1	37536	10077	89226	2048	52.42
BSTS1.bin.95	69.15	0.03	Neural Network (Specific Model)	11	0.906	33278	363.552	1685153	0.56	1402	None	71	1685153	0	23734.5	33278	12483	92224	2129	56.11
BSTS1.bin.97	96.33	0.46	Gradient Boost (General Model)	11	0.913	46248	351.57	1631155	0.64	1415	None	64	1631155	0	25486.8	46248	13023	102754	2231	63.88
BSTS1.bin.98	69.09	0.37	Gradient Boost (General Model)	11	0.92	3994	280.461	1344837	0.48	1473	None	358	1344837	0	3756.53	3994	2338	13534	2003	48.37
BSTS10.bin.101	60.99	0.14	Neural Network (Specific Model)	11	0.896	5318	274.756	1454807	0.54	1584	None	307	1454807	0	4738.79	5318	2594	20302	2018	53.93
BSTS10.bin.102	68.05	0.17	Neural Network (Specific Model)	11	0.901	70448	384.326	1869443	0.53	1463	None	45	1869443	0	41543.2	70448	21836	153570	2211	53.07
BSTS10.bin.103	86.43	1.27	Neural Network (Specific Model)	11	0.901	25031	312.761	3359100	0.43	3231	None	236	3359100	0	14233.5	25031	6252	71106	2040	43.31
BSTS10.bin.110	66.86	0.11	Neural Network (Specific Model)	11	0.9	8552	332.479	1606499	0.49	1452	None	238	1606499	0	6750	8552	3443	29361	2001	49.26
BSTS10.bin.114	93.77	0.89	Gradient Boost (General Model)	11	0.915	51681	333.354	1643875	0.61	1506	None	61	1643875	0	26948.8	51681	13237	116215	2105	60.94
BSTS10.bin.13	84.34	0.54	Neural Network (Specific Model)	11	0.91	46558	343.657	1942703	0.54	1717	None	58	1942703	0	33494.9	46558	15858	134859	4290	53.91
BSTS10.bin.133	62.3	0.24	Neural Network (Specific Model)	11	0.925	11466	329.178	1510970	0.49	1418	None	180	1510970	0	8394.28	11466	4104	37380	2027	49.45
BSTS10.bin.139	80.51	3.14	Neural Network (Specific Model)	11	0.897	69563	309.313	2331077	0.51	2257	None	53	2331077	0	43982.6	69563	18521	203261	2895	51.36
BSTS10.bin.141	80.57	0.93	Neural Network (Specific Model)	11	0.879	35092	308.19	2385373	0.53	2272	None	95	2385373	0	25109.2	35092	13431	106252	2134	53.09
BSTS10.bin.144	83.02	0.95	Neural Network (Specific Model)	11	0.901	7341	301.338	1532617	0.53	1529	None	246	1532617	0	6230.15	7341	3339	27247	2010	52.59
BSTS10.bin.17	71.38	0	Neural Network (Specific Model)	11	0.91	26698	380.883	2017219	0.54	1609	None	93	2017219	0	21690.5	26698	10828	121148	2269	54.29
BSTS10.bin.20	72.95	1.42	Gradient Boost (General Model)	11	0.874	4689	289.135	1215346	0.42	1226	None	281	1215346	0	4325.07	4689	2412	14133	2006	41.72
BSTS10.bin.22	56.66	0.12	Neural Network (Specific Model)	11	0.909	82214	362.244	1281099	0.45	1073	None	23	1281099	0	55700	82214	28403	186812	2172	44.66
BSTS10.bin.27	87.5	1.77	Gradient Boost (General Model)	11	0.889	8706	289.475	2791866	0.55	2863	None	396	2791866	0	7050.17	8706	3364	46129	2003	54.7
BSTS10.bin.29	57.06	0.14	Gradient Boost (General Model)	11	0.902	4129	283.018	1041723	0.58	1109	None	270	1041723	0	3858.23	4129	2356	14163	2017	57.52
BSTS10.bin.33	93.98	4.26	Gradient Boost (General Model)	11	0.922	15152	343.385	2175508	0.53	1950	None	206	2175508	0	10560.7	15152	4990	62413	2083	53.35
BSTS10.bin.34	96.93	1.1	Gradient Boost (General Model)	11	0.839	22890	309.292	2569313	0.41	2328	None	214	2569313	0	12006.1	22890	4302	95665	2011	40.64
BSTS10.bin.37	91.72	0.37	Neural Network (Specific Model)	11	0.875	23605	313.171	2288856	0.44	2135	None	173	2288856	0	13230.4	23605	5511	62657	2030	44
BSTS10.bin.38	85.45	2.14	Gradient Boost (General Model)	11	0.886	25348	336.498	3485385	0.5	3063	None	225	3485385	0	15490.6	25348	7779	83744	2042	49.83
BSTS10.bin.41	85.26	3.51	Gradient Boost (General Model)	11	0.932	7436	322.117	1998804	0.54	1932	None	317	1998804	0	6305.38	7436	3436	28179	2015	53.86
BSTS10.bin.43	81	0.18	Neural Network (Specific Model)	11	0.919	8160	314.921	2287497	0.48	2228	None	362	2287497	0	6319.05	8160	3033	38092	2004	48.39
BSTS10.bin.45	76.04	2.88	Gradient Boost (General Model)	11	0.891	10591	308.547	1985365	0.62	1913	None	232	1985365	0	8557.61	10591	4043	35699	2016	61.62
BSTS10.bin.48	80.6	0.91	Neural Network (Specific Model)	11	0.906	21646	317.797	2451816	0.45	2335	None	179	2451816	0	13697.3	21646	6099	96879	2029	45.43
BSTS10.bin.53	94.32	2.01	Gradient Boost (General Model)	11	0.878	10373	313.333	1799049	0.55	1682	None	221	1799049	0	8140.49	10373	4061	29862	2024	55.32
BSTS10.bin.57	70.65	0.53	Gradient Boost (General Model)	11	0.872	5715	289.493	1645406	0.48	1655	None	332	1645406	0	4956.04	5715	2657	29854	2003	48.32
BSTS10.bin.58	84.81	0.19	Neural Network (Specific Model)	11	0.924	47255	343.315	2481796	0.47	2230	None	97	2481796	0	25585.5	47255	12717	245110	2019	46.76
BSTS10.bin.6	85.51	1.95	Neural Network (Specific Model)	11	0.92	11845	305.554	2359037	0.48	2372	None	260	2359037	0	9073.22	11845	4711	44931	2002	47.88
BSTS10.bin.62	77.39	3.27	Gradient Boost (General Model)	11	0.889	7237	322.851	1481939	0.61	1362	None	249	1481939	0	5951.56	7237	2949	21584	2009	60.97
BSTS10.bin.64	78.88	3.4	Neural Network (Specific Model)	11	0.903	8811	340.17	2004714	0.53	1775	None	305	2004714	0	6572.83	8811	3344	36466	2010	53.23
BSTS10.bin.65	83.53	0.31	Neural Network (Specific Model)	11	0.907	23597	366.756	2887706	0.51	2385	None	186	2887706	0	15525.3	23597	7576	60023	2019	51.15
BSTS10.bin.66	82.71	0.24	Gradient Boost (General Model)	11	0.928	5031	309.017	1707627	0.5	1712	None	381	1707627	0	4481.96	5031	2576	17947	2022	49.97
BSTS10.bin.7	98.73	1.56	Gradient Boost (General Model)	11	0.906	23837	305.408	1907459	0.42	1890	None	141	1907459	0	13528.1	23837	5940	101027	2028	41.69
BSTS10.bin.72	91.15	0.37	Gradient Boost (General Model)	11	0.882	11592	314.339	1810057	0.47	1695	None	215	1810057	0	8418.87	11592	3699	45538	2000	47.46
BSTS10.bin.86	92.65	0.97	Gradient Boost (General Model)	11	0.871	53691	336.838	3191086	0.42	2753	None	92	3191086	0	34685.7	53691	18083	109070	2075	41.62
BSTS10.bin.87	84.62	2.15	Gradient Boost (General Model)	11	0.924	6399	289.369	1979909	0.48	2111	None	365	1979909	0	5424.41	6399	2858	33064	2003	48.09
BSTS10.bin.90	96.42	3.42	Gradient Boost (General Model)	11	0.863	45147	309.01	3184501	0.6	2968	None	147	3184501	0	21663.3	45147	11869	109229	2034	59.73
BSTS10.bin.91	69.69	3.53	Gradient Boost (General Model)	11	0.918	3971	275.902	1882936	0.45	2092	None	497	1882936	0	3788.6	3971	2284	18367	2004	44.83
BSTS10.bin.96	51.56	0.3	Neural Network (Specific Model)	11	0.902	23067	334.041	1386794	0.46	1249	None	86	1386794	0	16125.5	23067	8445	75138	2039	45.84
BSTS10.bin.97	94.52	0.05	Neural Network (Specific Model)	11	0.908	115635	330.917	3227123	0.47	2955	None	43	3227123	0	75049.4	115635	44427	413061	2447	46.65
BSTS10.bin.99	95.93	1.84	Gradient Boost (General Model)	11	0.871	98984	303.542	2458787	0.52	2354	None	39	2458787	0	63045.8	98984	29779	196105	3363	52.37
BSTS11.bin.101	99.09	1.11	Gradient Boost (General Model)	11	0.893	58569	333.352	3462523	0.51	3099	None	96	3462523	0	36067.9	58569	17624	173850	2692	50.64
BSTS11.bin.103	80.76	1.53	Gradient Boost (General Model)	11	0.91	9168	306.512	1446913	0.56	1433	None	208	1446913	0	6956.31	9168	3131	44656	2008	56.13
BSTS11.bin.107	75.17	0.99	Neural Network (Specific Model)	11	0.928	12232	340.53	1922877	0.47	1749	None	204	1922877	0	9425.87	12232	4807	47458	2022	47.4
BSTS11.bin.109	59.69	0.33	Neural Network (Specific Model)	11	0.914	5519	287.106	1437858	0.58	1529	None	290	1437858	0	4958.13	5519	2736	31283	2000	57.59
BSTS11.bin.11	72.37	1.05	Neural Network (Specific Model)	11	0.907	22012	344.869	2289975	0.46	2011	None	159	2289975	0	14402.4	22012	6881	62362	2086	46.04
BSTS11.bin.114	56.11	0.93	Neural Network (Specific Model)	11	0.941	5348	315.068	1221314	0.5	1220	None	256	1221314	0	4770.76	5348	2638	16953	2001	50.34
BSTS11.bin.116	89.9	0.08	Gradient Boost (General Model)	11	0.923	20210	338.633	2514232	0.49	2287	None	188	2514232	0	13373.6	20210	6512	75703	2063	49.08
BSTS11.bin.117	97.26	0.72	Gradient Boost (General Model)	11	0.881	51721	359.284	1651883	0.6	1351	None	54	1651883	0	30590.4	51721	15523	129565	2016	60.38
BSTS11.bin.122	92.16	1.67	Gradient Boost (General Model)	11	0.878	68348	328.145	3881439	0.5	3467	None	96	3881439	0	40431.7	68348	20308	152675	2245	50.01
BSTS11.bin.123	82.86	0	Neural Network (Specific Model)	11	0.892	60794	351.373	1843875	0.5	1562	None	41	1843875	0	44972.6	60794	23586	171821	2952	50.17
BSTS11.bin.126	90.57	1.09	Neural Network (Specific Model)	11	0.924	25312	349.298	2285796	0.53	2020	None	134	2285796	0	17058.2	25312	9389	73800	2029	53.08
BSTS11.bin.132	84.03	2.04	Neural Network (Specific Model)	11	0.925	12849	340.011	2085206	0.51	1894	None	221	2085206	0	9435.32	12849	4496	34870	2113	51.3
BSTS11.bin.134	87.19	3.43	Gradient Boost (General Model)	11	0.853	6640	277.989	2244680	0.58	2304	None	415	2244680	0	5408.87	6640	2788	17406	2011	57.51
BSTS11.bin.137	97.78	1.76	Gradient Boost (General Model)	11	0.901	93027	335.083	3187384	0.49	2861	None	54	3187384	0	59025.6	93027	35110	303806	2026	48.96
BSTS11.bin.138	93.77	3.19	Neural Network (Specific Model)	11	0.912	22830	349.101	2315079	0.51	2018	None	167	2315079	0	13862.8	22830	6349	63561	2024	51.21
BSTS11.bin.144	59.93	1.62	Gradient Boost (General Model)	11	0.879	5292	276.622	1407964	0.43	1494	None	305	1407964	0	4616.28	5292	2586	19902	2008	42.91
BSTS11.bin.146	72.39	4.27	Neural Network (Specific Model)	11	0.919	5814	298.418	1693942	0.51	1743	None	329	1693942	0	5148.76	5814	2822	19013	2004	50.8
BSTS11.bin.147	83.48	3.16	Neural Network (Specific Model)	11	0.903	28666	326.551	2126933	0.48	1964	None	111	2126933	0	19161.6	28666	10640	61465	2269	48.48
BSTS11.bin.149	75.06	0.28	Gradient Boost (General Model)	11	0.93	15331	340.501	2225761	0.49	2029	None	219	2225761	0	10163.3	15331	4250	80056	2022	49.16
BSTS11.bin.150	84.34	0.05	Neural Network (Specific Model)	11	0.909	86386	351.613	1821227	0.49	1571	None	28	1821227	0	65043.8	86386	36155	183763	7467	49.06
BSTS11.bin.156	93.5	1.77	Gradient Boost (General Model)	11	0.864	52959	306.37	2691130	0.52	2532	None	79	2691130	0	34064.9	52959	17494	131563	2660	51.52
BSTS11.bin.16	81.16	0.34	Neural Network (Specific Model)	11	0.92	16667	332.45	1739355	0.55	1608	None	143	1739355	0	12163.3	16667	6124	65626	2144	54.68
BSTS11.bin.2	87.08	0.72	Gradient Boost (General Model)	11	0.904	29752	329.765	2498003	0.45	2286	None	111	2498003	0	22504.5	29752	12006	114993	2216	44.54
BSTS11.bin.25	53.26	0.26	Gradient Boost (General Model)	11	0.858	3952	254.563	375323	0.4	423	None	95	375323	0	3950.77	3952	2510	11365	2049	39.63
BSTS11.bin.28	84.13	2.04	Neural Network (Specific Model)	11	0.899	7763	304.508	2039731	0.48	2010	None	316	2039731	0	6454.84	7763	3427	30275	2024	47.84
BSTS11.bin.4	87.96	0.98	Neural Network (Specific Model)	11	0.896	48856	365.09	2122887	0.47	1738	None	73	2122887	0	29080.6	48856	13127	187006	2417	46.86
BSTS11.bin.40	82.32	0.09	Neural Network (Specific Model)	11	0.875	75272	321.322	2358205	0.54	2144	None	43	2358205	0	54842	75272	38133	147057	3516	53.8
BSTS11.bin.52	97.44	2.63	Gradient Boost (General Model)	11	0.899	17570	315.577	1707114	0.59	1622	None	154	1707114	0	11085.2	17570	5299	44882	2015	59.48
BSTS11.bin.54	80.94	1.04	Gradient Boost (General Model)	11	0.909	14325	332.142	1839281	0.46	1679	None	187	1839281	0	9835.73	14325	4940	56244	2026	45.6
BSTS11.bin.55	82.29	2.2	Neural Network (Specific Model)	11	0.91	15818	351.952	1722789	0.47	1486	None	154	1722789	0	11186.9	15818	4947	54285	2033	46.86
BSTS11.bin.56	93.68	3.84	Gradient Boost (General Model)	11	0.903	25460	309.595	1952196	0.41	1902	None	118	1952196	0	16544	25460	8580	82457	2034	41.34
BSTS11.bin.59	80.08	1.93	Gradient Boost (General Model)	11	0.924	5714	291.146	1975414	0.48	2094	None	379	1975414	0	5212.17	5714	2863	26325	2008	48.16
BSTS11.bin.61	85.83	0.18	Neural Network (Specific Model)	11	0.873	16203	301.137	2292232	0.44	2219	None	244	2292232	0	9394.39	16203	3651	76154	2035	44
BSTS11.bin.68	59.12	0.83	Neural Network (Specific Model)	11	0.915	28155	352.665	1560746	0.57	1352	None	79	1560746	0	19756.3	28155	9445	105756	2370	56.83
BSTS11.bin.7	86.85	1.44	Neural Network (Specific Model)	11	0.913	26920	348.214	2575911	0.47	2254	None	150	2575911	0	17172.7	26920	8969	97268	2009	47.23
BSTS11.bin.71	85.96	1.76	Neural Network (Specific Model)	11	0.918	13721	338.744	2206811	0.52	1997	None	209	2206811	0	10558.9	13721	5575	82593	2028	52.44
BSTS11.bin.74	69.84	1.92	Neural Network (Specific Model)	11	0.882	7283	278.898	2137831	0.45	2257	None	374	2137831	0	5716.13	7283	2792	30695	2003	45.47
BSTS11.bin.80	87.11	0.23	Neural Network (Specific Model)	11	0.895	10533	288.952	1724554	0.55	1784	None	227	1724554	0	7597.15	10533	3573	36473	2011	54.9
BSTS11.bin.90	82.95	0.45	Neural Network (Specific Model)	11	0.896	29798	364.211	2593974	0.46	2129	None	129	2593974	0	20108.3	29798	9274	86680	2071	46.46
BSTS11.bin.91	78.83	2.58	Gradient Boost (General Model)	11	0.911	23508	331.059	2586670	0.46	2377	None	174	2586670	0	14865.9	23508	7489	52565	2005	46.25
BSTS12.bin.111	62.17	1.69	Neural Network (Specific Model)	11	0.925	13203	338.479	1416823	0.55	1293	None	135	1416823	0	10495	13203	5119	42444	2136	54.82
BSTS12.bin.117	78	2.96	Gradient Boost (General Model)	11	0.917	7325	312.668	1356380	0.56	1329	None	229	1356380	0	5923.06	7325	2968	30662	2006	56.36
BSTS12.bin.121	73.07	0.04	Neural Network (Specific Model)	11	0.907	37817	350.511	1824293	0.5	1576	None	67	1824293	0	27228.2	37817	13793	84017	3667	49.83
BSTS12.bin.125	65.75	0	Neural Network (Specific Model)	11	0.876	193636	334.343	1833468	0.56	1605	None	16	1833468	0	114592	193636	93224	361301	3854	55.99
BSTS12.bin.128	81.29	2.86	Neural Network (Specific Model)	11	0.896	19145	314.025	2148671	0.51	2047	None	167	2148671	0	12866.3	19145	5729	55721	2097	50.71
BSTS12.bin.129	63.74	0.02	Neural Network (Specific Model)	11	0.913	81414	316.636	1667560	0.49	1606	None	37	1667560	0	45069.2	81414	31676	164640	2630	49.12
BSTS12.bin.13	84.79	4.49	Neural Network (Specific Model)	11	0.925	12863	336.529	2552171	0.48	2343	None	258	2552171	0	9892.14	12863	5196	76332	2042	47.71
BSTS12.bin.131	55.83	0	Neural Network (Specific Model)	11	0.846	24148	297.043	2031210	0.45	1932	None	116	2031210	0	17510.4	24148	8996	90281	2177	45.06
BSTS12.bin.139	92.5	1.33	Gradient Boost (General Model)	11	0.905	27476	327.55	2383269	0.46	2199	None	125	2383269	0	19066.2	27476	9603	104542	2117	45.72
BSTS12.bin.145	98.19	0.18	Neural Network (Specific Model)	11	0.892	72830	370.892	2504286	0.52	2010	None	46	2504286	0	54441	72830	29106	174006	6682	52.01
BSTS12.bin.147	88.15	2.45	Gradient Boost (General Model)	11	0.913	14207	319.96	1416216	0.56	1349	None	153	1416216	0	9256.31	14207	4209	54004	2004	56.02
BSTS12.bin.152	78.5	0.72	Neural Network (Specific Model)	11	0.857	6429	298.636	2220371	0.46	2128	None	408	2220371	0	5442.09	6429	2891	32664	2001	45.95
BSTS12.bin.17	90.05	0.12	Gradient Boost (General Model)	11	0.905	117232	338.41	2612871	0.44	2333	None	42	2612871	0	62211.2	117232	35420	315677	2121	44.24
BSTS12.bin.21	80.15	0.1	Neural Network (Specific Model)	11	0.928	46711	363.933	2109020	0.47	1794	None	69	2109020	0	30565.5	46711	16478	133902	2548	46.55
BSTS12.bin.22	96.1	1.95	Gradient Boost (General Model)	11	0.855	13021	292.237	2328973	0.6	2276	None	247	2328973	0	9429.04	13021	4446	58008	2026	59.7
BSTS12.bin.31	72.33	0.01	Neural Network (Specific Model)	11	0.9	72613	352.014	1521612	0.47	1299	None	33	1521612	0	46109.4	72613	26080	167751	2129	47.23
BSTS12.bin.47	82.55	0.23	Neural Network (Specific Model)	11	0.82	26758	315.094	1827567	0.42	1587	None	108	1827567	0	16921.9	26758	9337	77257	2015	41.57
BSTS12.bin.48	86.78	2.92	Gradient Boost (General Model)	11	0.907	5658	284.131	1792655	0.55	1911	None	367	1792655	0	4884.62	5658	2627	24806	2006	55.14
BSTS12.bin.50	70.12	3.8	Neural Network (Specific Model)	11	0.921	7801	339.086	1850085	0.53	1678	None	290	1850085	0	6379.6	7801	3314	36895	2016	52.87
BSTS12.bin.62	92.51	1.77	Neural Network (Specific Model)	11	0.902	26052	306.851	2723591	0.58	2672	None	170	2723591	0	16021.1	26052	7012	86198	2000	57.92
BSTS12.bin.67	97.19	0.55	Gradient Boost (General Model)	11	0.918	28542	336.644	2440222	0.45	2221	None	131	2440222	0	18627.7	28542	9257	109098	2133	44.74
BSTS12.bin.78	96.43	2.27	Gradient Boost (General Model)	11	0.878	88957	328.706	4291599	0.5	3829	None	85	4291599	0	50489.4	88957	28076	221918	2146	49.58
BSTS12.bin.92	85.94	0.42	Neural Network (Specific Model)	11	0.898	15223	297.317	1749953	0.55	1765	None	167	1749953	0	10478.8	15223	4887	66879	2022	55.09
BSTS12.bin.94	74.71	3.76	Gradient Boost (General Model)	11	0.92	13877	323.823	1974290	0.49	1873	None	211	1974290	0	9356.82	13877	4260	63102	2039	49.42
BSTS12.bin.97	78.23	1.56	Neural Network (Specific Model)	11	0.899	7093	300.923	1923192	0.48	1918	None	316	1923192	0	6086.05	7093	3180	26109	2006	47.8
BSTS12.bin.99	96.01	2.83	Gradient Boost (General Model)	11	0.887	67103	336.686	3578530	0.42	3146	None	90	3578530	0	39761.4	67103	20230	138906	2404	41.64
BSTS13.bin.102	90.85	0.63	Neural Network (Specific Model)	11	0.927	13044	338.245	2190209	0.54	2004	None	213	2190209	0	10282.7	13044	5224	49452	2235	53.57
BSTS13.bin.103	70.69	2.19	Neural Network (Specific Model)	11	0.931	10804	318.931	1395550	0.44	1360	None	176	1395550	0	7929.26	10804	3145	70847	2035	43.6
BSTS13.bin.105	77.27	2.27	Gradient Boost (General Model)	11	0.885	8102	294.828	2212735	0.57	2218	None	347	2212735	0	6376.76	8102	3032	38271	2002	56.97
BSTS13.bin.108	97.2	1.62	Gradient Boost (General Model)	11	0.904	37568	321.969	1884660	0.57	1766	None	85	1884660	0	22172.5	37568	9932	129997	2343	57.08
BSTS13.bin.11	82.2	1.44	Gradient Boost (General Model)	11	0.883	9104	304.907	1780583	0.45	1722	None	252	1780583	0	7065.81	9104	3389	35890	2023	45.14
BSTS13.bin.113	61.61	0.64	Gradient Boost (General Model)	11	0.915	5100	300.06	950989	0.47	968	None	205	950989	0	4638.97	5100	2706	16367	2000	46.96
BSTS13.bin.117	89.37	2.32	Gradient Boost (General Model)	11	0.912	14095	328.346	1427545	0.56	1323	None	148	1427545	0	9645.57	14095	4346	44357	2028	56.14
BSTS13.bin.118	51.86	0.06	Neural Network (Specific Model)	11	0.899	58558	372.325	1306366	0.51	1053	None	40	1306366	0	32659.2	58558	13909	111776	2343	51.08
BSTS13.bin.123	71.11	1.77	Neural Network (Specific Model)	11	0.91	15383	350.063	1733172	0.53	1503	None	151	1733172	0	11478	15383	5375	61726	2098	52.71
BSTS13.bin.132	59.67	1.66	Neural Network (Specific Model)	11	0.88	14250	332.325	1244903	0.44	1100	None	138	1244903	0	9021.04	14250	3480	58258	2052	44.36
BSTS13.bin.134	94.38	2.85	Gradient Boost (General Model)	11	0.899	9473	300.471	2589282	0.53	2586	None	357	2589282	0	7252.89	9473	3260	39348	2030	52.72
BSTS13.bin.138	67.46	1.4	Neural Network (Specific Model)	11	0.91	6733	303.813	1185034	0.58	1185	None	214	1185034	0	5537.54	6733	2747	22340	2002	58.07
BSTS13.bin.143	83.87	0.74	Gradient Boost (General Model)	11	0.926	7239	305.603	1215418	0.57	1230	None	209	1215418	0	5815.4	7239	3016	24903	2012	57.36
BSTS13.bin.149	70.47	2.67	Neural Network (Specific Model)	11	0.915	9406	334.024	2002835	0.46	1831	None	268	2002835	0	7473.27	9406	3482	37078	2005	46.21
BSTS13.bin.15	72.52	0.5	Neural Network (Specific Model)	11	0.876	11003	306.399	1869992	0.45	1785	None	253	1869992	0	7391.27	11003	3161	78013	2009	44.99
BSTS13.bin.152	81.32	3.28	Neural Network (Specific Model)	11	0.916	13157	354.389	2059013	0.5	1776	None	202	2059013	0	10193.1	13157	4615	39033	2029	50.44
BSTS13.bin.155	71.7	0.91	Neural Network (Specific Model)	11	0.942	7220	289.683	1461284	0.57	1588	None	252	1461284	0	5798.75	7220	2990	37884	2049	57.47
BSTS13.bin.160	74.64	2.94	Gradient Boost (General Model)	11	0.919	8626	352.506	2527071	0.52	2200	None	374	2527071	0	6756.87	8626	3414	41168	2006	52.48
BSTS13.bin.165	63.09	0.09	Gradient Boost (General Model)	11	0.883	5209	289.462	1517929	0.46	1546	None	337	1517929	0	4504.24	5209	2453	15008	2002	45.71
BSTS13.bin.168	61.38	1.83	Neural Network (Specific Model)	11	0.9	7980	297.549	1835269	0.52	1855	None	284	1835269	0	6462.21	7980	3185	29334	2005	51.81
BSTS13.bin.169	90.76	0.73	Gradient Boost (General Model)	11	0.871	7517	287.655	2042455	0.5	2065	None	328	2042455	0	6227	7517	3221	23942	2001	49.66
BSTS13.bin.177	83.88	0.64	Gradient Boost (General Model)	11	0.9	6492	280.506	1621964	0.51	1738	None	298	1621964	0	5442.83	6492	2797	30487	2020	50.55
BSTS13.bin.2	66.53	0.04	Gradient Boost (General Model)	11	0.911	6421	282.124	1409356	0.48	1520	None	257	1409356	0	5483.88	6421	2832	26558	2005	47.58
BSTS13.bin.20	99.89	0.22	Neural Network (Specific Model)	11	0.872	59935	324.988	2677003	0.53	2401	None	79	2677003	0	33886.1	59935	19574	142768	2099	52.77
BSTS13.bin.24	85.54	0.61	Neural Network (Specific Model)	11	0.918	13438	341.309	1944465	0.53	1746	None	198	1944465	0	9820.53	13438	4714	39484	2189	53.32
BSTS13.bin.25	64.38	1.94	Neural Network (Specific Model)	11	0.917	4798	305.843	1474488	0.46	1477	None	348	1474488	0	4237.03	4798	2520	12888	2007	45.98
BSTS13.bin.3	69.9	0.76	Gradient Boost (General Model)	11	0.93	5506	331.76	1633881	0.57	1529	None	344	1633881	0	4749.65	5506	2600	17431	2004	57.4
BSTS13.bin.31	63.69	0.05	Neural Network (Specific Model)	11	0.94	18570	368.606	1365369	0.51	1163	None	95	1365369	0	14372.3	18570	7575	43429	2290	51.03
BSTS13.bin.33	99.51	0.08	Neural Network (Specific Model)	11	0.901	22844	322.633	2146372	0.55	2002	None	152	2146372	0	14120.9	22844	6762	79263	2037	54.76
BSTS13.bin.39	94.08	0.34	Gradient Boost (General Model)	11	0.866	23603	316.615	2017976	0.56	1845	None	135	2017976	0	14948	23603	7918	89139	2016	56.1
BSTS13.bin.4	99.67	0.02	Neural Network (Specific Model)	11	0.908	41445	315.914	2453230	0.52	2356	None	92	2453230	0	26665.5	41445	15799	110769	2076	52.41
BSTS13.bin.41	74.05	3.23	Neural Network (Specific Model)	11	0.923	6368	316.936	1707041	0.49	1660	None	321	1707041	0	5317.88	6368	2896	22997	2002	49.29
BSTS13.bin.5	67.7	2.91	Neural Network (Specific Model)	11	0.892	17068	300.803	614886	0.51	609	None	53	614886	0	11601.6	17068	6080	35656	2239	51.14
BSTS13.bin.50	86.78	3.52	Neural Network (Specific Model)	11	0.901	12889	329.309	1941552	0.51	1774	None	209	1941552	0	9289.72	12889	4111	66860	2014	50.57
BSTS13.bin.52	87.52	2.79	Gradient Boost (General Model)	11	0.858	6756	287.423	2170947	0.52	2168	None	385	2170947	0	5638.82	6756	3011	22535	2004	52.43
BSTS13.bin.57	75.14	2.16	Neural Network (Specific Model)	11	0.909	20491	376.638	2857040	0.52	2300	None	194	2857040	0	14727	20491	7529	71245	2002	51.64
BSTS13.bin.59	72.08	2.81	Neural Network (Specific Model)	11	0.895	6411	320.258	1752250	0.62	1635	None	328	1752250	0	5342.23	6411	2813	36656	2000	62.48
BSTS13.bin.61	68.96	2.8	Gradient Boost (General Model)	11	0.934	4896	318.092	1632209	0.55	1601	None	363	1632209	0	4496.44	4896	2527	22337	2012	54.68
BSTS13.bin.64	74.9	2.06	Gradient Boost (General Model)	11	0.915	5460	291.672	1826250	0.54	1913	None	379	1826250	0	4818.6	5460	2691	21334	2027	53.7
BSTS13.bin.65	86.59	0.64	Neural Network (Specific Model)	11	0.935	12379	352.33	2351619	0.54	2083	None	260	2351619	0	9044.69	12379	4447	54569	2010	54.17
BSTS13.bin.68	65.03	1.04	Neural Network (Specific Model)	11	0.893	21500	335.629	1407267	0.46	1249	None	122	1407267	0	11535	21500	4442	65849	2088	45.8
BSTS13.bin.78	86.14	0.37	Neural Network (Specific Model)	11	0.917	24966	347.894	2421916	0.54	2131	None	140	2421916	0	17299.4	24966	9430	87329	2127	53.68
BSTS13.bin.95	86.71	2.45	Gradient Boost (General Model)	11	0.909	17679	354.18	1844140	0.52	1579	None	147	1844140	0	12545.2	17679	6191	77356	2082	51.65
BSTS14.bin.101	89.73	4.5	Neural Network (Specific Model)	11	0.875	23965	294.571	2504114	0.53	2483	None	155	2504114	0	16155.6	23965	7275	81015	2147	52.73
BSTS14.bin.102	92.61	2.55	Neural Network (Specific Model)	11	0.889	49757	300.58	2291833	0.52	2263	None	73	2291833	0	31395	49757	15970	115499	2891	51.98
BSTS14.bin.109	91.97	2.12	Neural Network (Specific Model)	11	0.926	13221	337.058	2165872	0.54	1987	None	214	2165872	0	10120.9	13221	4950	43205	2005	53.6
BSTS14.bin.114	67.26	1.79	Neural Network (Specific Model)	11	0.921	15796	354.269	2099425	0.45	1823	None	195	2099425	0	10766.3	15796	5239	51818	2000	44.96
BSTS14.bin.12	71.59	2.65	Neural Network (Specific Model)	11	0.898	6628	336.893	1565959	0.55	1393	None	277	1565959	0	5653.28	6628	2924	27178	2002	55.22
BSTS14.bin.122	64.78	0.83	Neural Network (Specific Model)	11	0.926	5652	324.32	2003342	0.53	1910	None	406	2003342	0	4934.34	5652	2644	27971	2010	53.11
BSTS14.bin.126	68.5	0.03	Neural Network (Specific Model)	11	0.916	11936	337.957	1700555	0.5	1538	None	187	1700555	0	9093.88	11936	4676	40491	2011	50.17
BSTS14.bin.132	59.37	1.08	Gradient Boost (General Model)	11	0.911	4013	263.331	1322704	0.52	1528	None	349	1322704	0	3789.98	4013	2370	12336	2006	52.23
BSTS14.bin.134	100	0.39	Gradient Boost (General Model)	11	0.856	35429	308.654	1722065	0.47	1595	None	68	1722065	0	25324.5	35429	14298	164805	2049	47.11
BSTS14.bin.136	62.25	1.46	Neural Network (Specific Model)	11	0.93	4976	311.129	1652707	0.54	1650	None	364	1652707	0	4540.4	4976	2691	17339	2018	54.34
BSTS14.bin.137	93.21	2.12	Neural Network (Specific Model)	11	0.893	44056	311.14	2457293	0.52	2355	None	84	2457293	0	29253.5	44056	16189	111286	2059	52.5
BSTS14.bin.14	66.19	1.69	Neural Network (Specific Model)	11	0.905	12128	353.979	1621952	0.52	1383	None	166	1621952	0	9770.79	12128	5194	45981	2007	51.78
BSTS14.bin.142	71.18	0.45	Neural Network (Specific Model)	11	0.911	9710	348.415	1739579	0.54	1519	None	227	1739579	0	7663.34	9710	3673	42327	2045	54.5
BSTS14.bin.15	95.33	0.14	Gradient Boost (General Model)	11	0.907	78117	336.446	2819014	0.44	2538	None	58	2819014	0	48603.7	78117	29142	353607	2255	44.19
BSTS14.bin.20	57.88	1.4	Neural Network (Specific Model)	11	0.895	238261	305.185	1315836	0.52	1288	None	13	1315836	0	101218	238261	36455	293983	14828	51.85
BSTS14.bin.30	58.28	0.1	Neural Network (Specific Model)	11	0.923	6424	316.909	1518916	0.47	1477	None	282	1518916	0	5386.23	6424	2976	18915	2003	46.65
BSTS14.bin.33	84.1	2.01	Gradient Boost (General Model)	11	0.926	96163	369.693	1628603	0.54	1363	None	21	1628603	0	77552.5	96163	38138	243052	21130	53.54
BSTS14.bin.35	83.99	0.34	Neural Network (Specific Model)	11	0.901	56291	347.834	1837172	0.47	1588	None	53	1837172	0	34663.6	56291	15648	134642	2321	46.77
BSTS14.bin.36	73.13	1.88	Neural Network (Specific Model)	11	0.882	35642	302.801	2135157	0.52	2079	None	106	2135157	0	20143	35642	10291	125692	2088	52.05
BSTS14.bin.38	88.4	2.9	Gradient Boost (General Model)	11	0.901	37919	323.625	2126508	0.63	1977	None	83	2126508	0	25620.6	37919	12269	144134	2004	63.09
BSTS14.bin.39	94.91	4.73	Gradient Boost (General Model)	11	0.848	11317	295.537	3177101	0.45	3044	None	368	3177101	0	8633.43	11317	4011	50251	2015	45.09
BSTS14.bin.43	73.68	2.19	Gradient Boost (General Model)	11	0.891	5639	317.137	1288491	0.61	1209	None	272	1288491	0	4737.1	5639	2482	18409	2003	61.18
BSTS14.bin.44	70.13	1.19	Neural Network (Specific Model)	11	0.906	32747	348.964	1715788	0.46	1488	None	81	1715788	0	21182.6	32747	9318	146248	2035	45.78
BSTS14.bin.47	91.04	2.11	Gradient Boost (General Model)	11	0.909	13526	318.696	2235306	0.46	2128	None	226	2235306	0	9890.73	13526	4684	58101	2015	45.83
BSTS14.bin.51	91.74	1.43	Gradient Boost (General Model)	11	0.899	36278	334.338	3356976	0.51	3013	None	143	3356976	0	23475.4	36278	12472	123105	2050	50.95
BSTS14.bin.53	96.19	3.19	Gradient Boost (General Model)	11	0.903	11157	293.087	1768878	0.43	1820	None	236	1768878	0	7495.25	11157	2999	73383	2012	42.53
BSTS14.bin.59	81.23	3.96	Neural Network (Specific Model)	11	0.915	8640	307.784	2905300	0.46	2886	None	461	2905300	0	6302.17	8640	2937	29685	2007	46.22
BSTS14.bin.60	98.16	2.04	Gradient Boost (General Model)	11	0.879	17625	313.014	2252228	0.54	2112	None	165	2252228	0	13649.9	17625	6806	55574	2226	54.31
BSTS14.bin.61	85.72	3.46	Gradient Boost (General Model)	11	0.895	12874	299.041	1647149	0.63	1645	None	174	1647149	0	9466.37	12874	4339	53617	2019	63.24
BSTS14.bin.75	94.63	3.59	Gradient Boost (General Model)	11	0.864	7006	283.38	2727338	0.45	2777	None	482	2727338	0	5658.38	7006	2805	29634	2026	45.25
BSTS14.bin.77	57.67	0.61	Neural Network (Specific Model)	11	0.903	10432	354.797	1898208	0.48	1612	None	234	1898208	0	8112	10432	4035	40360	2016	47.8
BSTS14.bin.79	98.64	0.32	Neural Network (Specific Model)	11	0.936	59933	350.773	2169986	0.51	1936	None	49	2169986	0	44285.4	59933	24686	165150	2108	50.97
BSTS14.bin.83	97.49	0.18	Neural Network (Specific Model)	11	0.918	37201	363.017	2065955	0.55	1745	None	79	2065955	0	26151.3	37201	12091	147547	3257	55.23
BSTS14.bin.85	74.38	1.44	Neural Network (Specific Model)	11	0.903	6062	302.582	1847064	0.48	1841	None	357	1847064	0	5173.85	6062	2895	24492	2002	47.88
BSTS14.bin.89	57.84	0.66	Gradient Boost (General Model)	11	0.888	4258	286.631	1392117	0.52	1440	None	360	1392117	0	3866.99	4258	2416	9612	2001	52.11
BSTS14.bin.9	73.06	2.32	Gradient Boost (General Model)	11	0.907	5376	304.85	1476379	0.44	1467	None	296	1476379	0	4987.77	5376	2829	17515	2009	43.84
BSTS14.bin.90	64.14	0.12	Neural Network (Specific Model)	11	0.91	17011	318.983	1501323	0.57	1430	None	118	1501323	0	12723.1	17011	5866	41940	2380	56.79
BSTS14.bin.91	97.4	1.96	Neural Network (Specific Model)	11	0.892	33433	315.988	2161580	0.53	2036	None	105	2161580	0	20586.5	33433	9467	132805	2170	53.27
BSTS14.bin.94	71.28	0.47	Neural Network (Specific Model)	11	0.891	25923	337.462	2302136	0.44	2028	None	126	2302136	0	18270.9	25923	10769	79946	2086	43.82
BSTS15.bin.10	97.49	2.89	Gradient Boost (General Model)	11	0.908	48853	346.394	3193134	0.49	2796	None	96	3193134	0	33261.8	48853	18187	175227	2076	49.14
BSTS15.bin.101	73.58	0.14	Neural Network (Specific Model)	11	0.948	6126	325.578	1561258	0.56	1519	None	302	1561258	0	5169.73	6126	2701	24381	2002	55.7
BSTS15.bin.104	60.08	1.08	Neural Network (Specific Model)	11	0.897	5019	330.663	1412828	0.61	1279	None	304	1412828	0	4647.46	5019	2556	21079	2006	61.07
BSTS15.bin.113	81.75	3.73	Gradient Boost (General Model)	11	0.915	8907	314.783	1322119	0.56	1283	None	179	1322119	0	7386.14	8907	3474	37529	2102	56.19
BSTS15.bin.119	81.03	0.17	Neural Network (Specific Model)	11	0.798	18870	313.92	2114603	0.38	1794	None	189	2114603	0	11188.4	18870	4426	54136	2004	38.22
BSTS15.bin.122	88.15	0.12	Neural Network (Specific Model)	11	0.925	60430	371.73	2386195	0.47	1982	None	62	2386195	0	38487	60430	19707	148911	3110	46.83
BSTS15.bin.123	76.99	4.76	Neural Network (Specific Model)	11	0.916	6086	329.353	1951600	0.51	1811	None	375	1951600	0	5204.27	6086	2815	23009	2004	51.43
BSTS15.bin.124	99.12	0	Neural Network (Specific Model)	11	0.909	65099	353.266	2343919	0.51	2012	None	56	2343919	0	41855.7	65099	18355	306625	4168	51.16
BSTS15.bin.128	90.32	1.15	Gradient Boost (General Model)	11	0.906	59245	322.8	2534665	0.43	2375	None	73	2534665	0	34721.4	59245	23382	135817	2001	43.23
BSTS15.bin.141	78.99	0.26	Gradient Boost (General Model)	11	0.913	10494	298.756	1585367	0.42	1617	None	202	1585367	0	7848.35	10494	3559	34150	2002	41.72
BSTS15.bin.142	75.18	2.43	Neural Network (Specific Model)	11	0.929	6476	308.115	1729050	0.54	1741	None	316	1729050	0	5471.68	6476	3016	21803	2001	54.08
BSTS15.bin.146	89.58	4.03	Neural Network (Specific Model)	11	0.937	20620	352.194	2062864	0.52	1833	None	159	2062864	0	12974	20620	5891	61114	2068	52.25
BSTS15.bin.148	77.08	2.72	Gradient Boost (General Model)	11	0.932	8494	330.179	1733581	0.54	1635	None	262	1733581	0	6616.72	8494	3271	33830	2012	53.64
BSTS15.bin.15	60.49	0.02	Neural Network (Specific Model)	11	0.912	65050	366.685	1649931	0.5	1370	None	36	1649931	0	45831.4	65050	23277	146932	6038	49.71
BSTS15.bin.29	73.36	0.42	Neural Network (Specific Model)	11	0.898	29022	308.773	1861451	0.53	1807	None	93	1861451	0	20015.6	29022	9512	83387	2115	52.8
BSTS15.bin.31	70.59	0.52	Neural Network (Specific Model)	11	0.884	10828	313.861	1694962	0.41	1593	None	232	1694962	0	7305.87	10828	2983	48500	2002	40.98
BSTS15.bin.32	82.51	0.08	Gradient Boost (General Model)	11	0.864	114232	310.665	1894726	0.53	1759	None	28	1894726	0	67668.8	114232	34757	261226	2423	52.53
BSTS15.bin.36	99.94	0.03	Neural Network (Specific Model)	11	0.865	75412	318.227	2727224	0.47	2477	None	94	2727224	0	29013	75412	15498	226235	2006	47.26
BSTS15.bin.43	88.68	3.14	Gradient Boost (General Model)	11	0.936	16447	346.999	2194009	0.51	1978	None	185	2194009	0	11859.5	16447	6060	68271	2022	50.67
BSTS15.bin.6	80.16	0.91	Gradient Boost (General Model)	11	0.879	7277	281.722	2065351	0.53	2151	None	338	2065351	0	6110.51	7277	3081	54000	2000	53.16
BSTS15.bin.64	76.36	3.85	Neural Network (Specific Model)	11	0.924	6730	331.545	2192907	0.54	2041	None	376	2192907	0	5832.2	6730	3016	52988	2006	53.68
BSTS15.bin.7	89.32	0.44	Neural Network (Specific Model)	11	0.887	68157	367.448	2393156	0.52	1927	None	48	2393156	0	49857.4	68157	25972	132166	3665	51.89
BSTS15.bin.71	88.9	1.03	Gradient Boost (General Model)	11	0.881	44655	333.54	3780387	0.5	3334	None	126	3780387	0	30003.1	44655	14988	122552	2014	50.13
BSTS15.bin.74	99.59	2.38	Neural Network (Specific Model)	11	0.898	81088	336.323	3260311	0.45	2907	None	74	3260311	0	44058.3	81088	17937	218227	2446	44.62
BSTS15.bin.88	65.58	0.21	Neural Network (Specific Model)	11	0.903	49852	337.63	2229392	0.44	1991	None	112	2229392	0	19905.3	49852	7562	131301	2020	43.6
BSTS15.bin.94	81.79	3.9	Neural Network (Specific Model)	11	0.903	13268	325.206	1899880	0.5	1762	None	203	1899880	0	9359.01	13268	4309	55115	2019	50.42
BSTS16.bin.102	79.14	3.79	Gradient Boost (General Model)	11	0.941	7248	328.62	1503064	0.51	1438	None	243	1503064	0	6185.45	7248	3110	37630	2001	50.6
BSTS16.bin.109	94.43	0.29	Gradient Boost (General Model)	11	0.913	67350	354.483	1566358	0.56	1347	None	41	1566358	0	38203.9	67350	19340	193108	2089	55.96
BSTS16.bin.116	64.43	0	Neural Network (Specific Model)	11	0.878	84889	320.174	1601748	0.56	1468	None	29	1601748	0	55232.7	84889	32063	312139	2232	56.23
BSTS16.bin.121	94.22	0	Gradient Boost (General Model)	11	0.92	11774	306.922	1376642	0.43	1377	None	151	1376642	0	9116.83	11774	4528	36721	2091	42.91
BSTS16.bin.126	100	0.88	Gradient Boost (General Model)	11	0.915	154227	329.198	2667581	0.47	2476	None	29	2667581	0	91985.6	154227	48281	375864	4356	47.22
BSTS16.bin.2	76.38	0.37	Gradient Boost (General Model)	11	0.869	10412	289.141	1556103	0.54	1562	None	195	1556103	0	7980.02	10412	3890	39372	2060	53.8
BSTS16.bin.22	99.97	0.4	Neural Network (Specific Model)	11	0.887	205749	293.125	2092500	0.41	2114	None	20	2092500	0	104625	205749	55599	431115	4009	40.99
BSTS16.bin.24	91.4	1.7	Gradient Boost (General Model)	11	0.871	8273	284.274	1888449	0.53	1933	None	278	1888449	0	6792.98	8273	3523	31492	2018	52.98
BSTS16.bin.27	62.91	0.12	Neural Network (Specific Model)	11	0.921	15114	323.391	1984642	0.44	1887	None	179	1984642	0	11087.4	15114	6057	40657	2001	44.5
BSTS16.bin.28	68.98	2.4	Neural Network (Specific Model)	11	0.932	5461	315.915	1558340	0.54	1535	None	328	1558340	0	4751.04	5461	2750	19160	2006	53.98
BSTS16.bin.33	79.95	0.37	Neural Network (Specific Model)	11	0.879	13752	295.52	1716423	0.63	1704	None	182	1716423	0	9430.9	13752	4327	51508	2099	63.27
BSTS16.bin.37	80.43	0.37	Neural Network (Specific Model)	11	0.917	22266	339.655	1379072	0.45	1243	None	86	1379072	0	16035.7	22266	8652	63012	2137	45.35
BSTS16.bin.38	100	1.05	Gradient Boost (General Model)	11	0.885	27688	291.917	2881130	0.45	2916	None	157	2881130	0	18351.2	27688	8272	102341	2122	44.9
BSTS16.bin.44	79.17	0	Neural Network (Specific Model)	11	0.893	38237	337.634	2085041	0.43	1842	None	92	2085041	0	22663.5	38237	12192	87984	2046	43.31
BSTS16.bin.5	92.48	2.16	Gradient Boost (General Model)	11	0.911	13842	317.676	1490548	0.56	1427	None	160	1490548	0	9315.92	13842	4111	54733	2045	55.9
BSTS16.bin.51	81.42	4.65	Gradient Boost (General Model)	11	0.919	9127	301	2407351	0.49	2453	None	357	2407351	0	6743.28	9127	3161	50994	2005	48.51
BSTS16.bin.55	84.36	4.72	Gradient Boost (General Model)	11	0.909	6573	309.888	2169905	0.44	2125	None	407	2169905	0	5331.46	6573	2808	24208	2001	43.87
BSTS16.bin.56	79.58	0.24	Neural Network (Specific Model)	11	0.886	36397	356.814	1905345	0.49	1578	None	82	1905345	0	23235.9	36397	11719	83016	2183	49.24
BSTS16.bin.6	99.91	0.03	Neural Network (Specific Model)	11	0.87	62485	309.049	2644426	0.56	2485	None	68	2644426	0	38888.6	62485	20914	207718	2173	56.46
BSTS16.bin.64	83.96	0.06	Neural Network (Specific Model)	11	0.908	50189	340.054	2220953	0.5	1980	None	67	2220953	0	33148.6	50189	14058	120765	5702	50.2
BSTS16.bin.65	68.85	3.43	Gradient Boost (General Model)	11	0.864	6594	250.936	663901	0.45	764	None	114	663901	0	5823.69	6594	3651	18220	2007	45.08
BSTS16.bin.75	80.38	0.09	Gradient Boost (General Model)	11	0.824	5608	295.262	1454901	0.39	1355	None	294	1454901	0	4948.64	5608	2607	31063	2004	39.03
BSTS16.bin.77	97.1	0.94	Gradient Boost (General Model)	11	0.901	142054	332.173	2851109	0.45	2582	None	43	2851109	0	66304.9	142054	38441	258584	2101	44.95
BSTS16.bin.8	88.58	0.82	Gradient Boost (General Model)	11	0.923	7437	294.277	1495035	0.6	1565	None	242	1495035	0	6177.83	7437	3110	25235	2003	60.15
BSTS16.bin.83	88.07	0.13	Gradient Boost (General Model)	11	0.876	10726	288.95	1815339	0.54	1836	None	212	1815339	0	8562.92	10726	4095	45473	2037	53.66
BSTS16.bin.95	79.84	0.6	Neural Network (Specific Model)	11	0.915	25703	302.97	1469119	0.41	1483	None	78	1469119	0	18834.9	25703	10085	137378	2114	40.81
BSTS16.bin.96	61.85	1.49	Gradient Boost (General Model)	11	0.916	7442	289.713	1278796	0.48	1350	None	229	1278796	0	5584.26	7442	2639	22408	2038	47.68
BSTS17.bin.112	80.94	0.87	Gradient Boost (General Model)	11	0.878	7295	283.553	1609678	0.54	1663	None	258	1609678	0	6239.06	7295	3203	34847	2034	53.8
BSTS17.bin.118	89.46	3.59	Neural Network (Specific Model)	11	0.919	24953	316.615	2155141	0.48	2090	None	134	2155141	0	16083.1	24953	7140	80690	2315	48.2
BSTS17.bin.124	60.65	1.84	Gradient Boost (General Model)	11	0.857	5296	296.846	2973626	0.65	2865	None	625	2973626	0	4757.8	5296	2595	33216	2013	65.05
BSTS17.bin.13	79.18	1.35	Gradient Boost (General Model)	11	0.91	7767	315.123	1513360	0.54	1459	None	229	1513360	0	6608.56	7767	3259	27084	2043	53.99
BSTS17.bin.24	96.3	0.07	Gradient Boost (General Model)	11	0.921	15701	311.916	2118730	0.48	2089	None	207	2118730	0	10235.4	15701	4554	64168	2051	48.06
BSTS17.bin.29	88.56	3.46	Gradient Boost (General Model)	11	0.921	12784	316.792	1483813	0.61	1439	None	169	1483813	0	8779.96	12784	3869	49420	2056	60.84
BSTS17.bin.32	59.38	1.51	Neural Network (Specific Model)	11	0.909	17112	327.028	1564555	0.45	1452	None	148	1564555	0	10571.3	17112	4544	90582	2169	44.82
BSTS17.bin.34	58.63	0.09	Gradient Boost (General Model)	11	0.888	4369	271.778	894207	0.61	975	None	218	894207	0	4101.87	4369	2396	13527	2005	61.37
BSTS17.bin.35	88.54	3.09	Gradient Boost (General Model)	11	0.914	11668	321.796	1522218	0.47	1443	None	185	1522218	0	8228.21	11668	3713	45924	2052	46.76
BSTS17.bin.37	83.66	0.41	Gradient Boost (General Model)	11	0.921	14284	316.025	2344142	0.49	2280	None	240	2344142	0	9767.26	14284	4196	52030	2003	48.61
BSTS17.bin.46	93.56	3.34	Neural Network (Specific Model)	11	0.909	46025	331.388	2720247	0.49	2492	None	112	2720247	0	24287.9	46025	12078	105166	2035	48.64
BSTS17.bin.5	77.75	0.52	Gradient Boost (General Model)	11	0.914	7775	293.597	1569325	0.48	1631	None	242	1569325	0	6484.81	7775	3351	28090	2000	47.54
BSTS17.bin.51	92.56	0.41	Gradient Boost (General Model)	11	0.903	30323	327.638	2500492	0.45	2299	None	135	2500492	0	18522.2	30323	8727	107169	2171	44.64
BSTS17.bin.52	58.87	0.72	Neural Network (Specific Model)	11	0.926	4918	326.848	1315614	0.51	1245	None	292	1315614	0	4505.53	4918	2621	14977	2017	50.98
BSTS17.bin.53	60.3	1.3	Neural Network (Specific Model)	11	0.939	4315	310.263	1581409	0.48	1599	None	380	1581409	0	4161.6	4315	2586	17281	2002	48.28
BSTS17.bin.54	75.17	4.61	Neural Network (Specific Model)	11	0.904	13575	338.686	1811932	0.45	1613	None	195	1811932	0	9291.96	13575	4330	55929	2180	45.38
BSTS17.bin.57	72.22	2.73	Gradient Boost (General Model)	11	0.914	7291	295.971	2049184	0.53	2113	None	346	2049184	0	5922.5	7291	3261	20891	2029	53.46
BSTS17.bin.65	67.85	1.11	Gradient Boost (General Model)	11	0.923	4492	281.358	1242900	0.62	1362	None	299	1242900	0	4156.86	4492	2407	14967	2007	61.57
BSTS17.bin.67	69.42	0.11	Neural Network (Specific Model)	11	0.911	81488	331.935	2029691	0.44	1860	None	52	2029691	0	39032.5	81488	20980	162524	2036	43.51
BSTS17.bin.71	95.18	0.15	Gradient Boost (General Model)	11	0.92	80431	332.705	2744924	0.49	2533	None	67	2744924	0	40969	80431	21171	251444	2221	48.65
BSTS17.bin.79	99.93	2.41	Neural Network (Specific Model)	11	0.885	48449	311.912	2628992	0.51	2493	None	121	2628992	0	21727.2	48449	10241	144672	2010	51.12
BSTS17.bin.81	99.88	0.06	Neural Network (Specific Model)	11	0.923	104578	323.485	2096872	0.55	2000	None	35	2096872	0	59910.6	104578	31946	232522	3642	55.49
BSTS17.bin.82	75.69	0.04	Neural Network (Specific Model)	11	0.919	10906	343.461	1722653	0.5	1539	None	199	1722653	0	8656.55	10906	4134	44300	2014	50.28
BSTS17.bin.89	54.93	0.51	Neural Network (Specific Model)	11	0.9	4482	286.466	750531	0.41	787	None	175	750531	0	4288.75	4482	2497	18798	2003	40.52
BSTS17.bin.94	72.19	1.88	Neural Network (Specific Model)	11	0.923	7411	305.994	1365230	0.62	1375	None	232	1365230	0	5884.61	7411	2870	44176	2016	61.8
BSTS17.bin.95	99.55	0.01	Neural Network (Specific Model)	11	0.894	191839	334.249	2200750	0.6	1965	None	18	2200750	0	122264	191839	68498	335165	10785	60.47
BSTS18.bin.104	93.67	1.13	Gradient Boost (General Model)	11	0.884	13067	298.014	1917522	0.58	1903	None	225	1917522	0	8522.32	13067	3829	53907	2023	57.54
BSTS18.bin.105	97.01	0.21	Gradient Boost (General Model)	11	0.862	40899	303.985	2249171	0.59	2133	None	85	2249171	0	26460.8	40899	13303	135355	2009	59.05
BSTS18.bin.106	91.8	2.74	Gradient Boost (General Model)	11	0.896	11528	303.432	2641252	0.48	2604	None	317	2641252	0	8332.03	11528	3872	42769	2006	47.88
BSTS18.bin.109	85.22	0.98	Gradient Boost (General Model)	11	0.914	13180	318.264	1412190	0.56	1354	None	154	1412190	0	9170.06	13180	4306	42607	2034	56.07
BSTS18.bin.110	91.47	1.84	Neural Network (Specific Model)	11	0.858	8890	301.824	2087596	0.53	1981	None	291	2087596	0	7173.87	8890	3465	31190	2001	52.84
BSTS18.bin.112	94.98	0.04	Gradient Boost (General Model)	11	0.917	76054	347.06	1658533	0.49	1464	None	36	1658533	0	46070.4	76054	25782	128139	2662	49.08
BSTS18.bin.113	78.22	1.58	Neural Network (Specific Model)	11	0.931	8947	316.988	1600350	0.43	1569	None	238	1600350	0	6724.16	8947	3009	43967	2003	43.22
BSTS18.bin.116	87.83	2.68	Gradient Boost (General Model)	11	0.874	7389	277.068	1813689	0.54	1911	None	304	1813689	0	5966.08	7389	3005	42336	2009	53.57
BSTS18.bin.12	76.48	0.41	Neural Network (Specific Model)	11	0.899	24940	314.731	2318168	0.46	2212	None	142	2318168	0	16325.1	24940	8029	84615	2029	46.01
BSTS18.bin.127	92.09	1.43	Neural Network (Specific Model)	11	0.896	91112	304.416	2750329	0.51	2704	None	54	2750329	0	50932	91112	23913	233133	2874	51.14
BSTS18.bin.129	64.26	1.24	Neural Network (Specific Model)	11	0.919	4969	299.828	1569523	0.57	1607	None	345	1569523	0	4549.34	4969	2630	18569	2010	56.79
BSTS18.bin.13	70.89	2.24	Gradient Boost (General Model)	11	0.892	6462	309.206	1295563	0.43	1247	None	249	1295563	0	5203.06	6462	2553	26655	2008	43.46
BSTS18.bin.14	85.38	1.85	Neural Network (Specific Model)	11	0.895	18355	349.765	1872123	0.45	1599	None	163	1872123	0	11485.4	18355	5013	49524	2006	45
BSTS18.bin.18	88.28	0.9	Gradient Boost (General Model)	11	0.932	11012	315.334	833396	0.49	823	None	101	833396	0	8251.45	11012	4108	56571	2083	49
BSTS18.bin.25	100	0.09	Neural Network (Specific Model)	11	0.895	89515	306.805	2030339	0.38	1977	None	44	2030339	0	46144.1	89515	24393	300855	2228	38.34
BSTS18.bin.30	92.78	0.75	Neural Network (Specific Model)	11	0.878	50917	321.048	3127910	0.42	2855	None	113	3127910	0	27680.6	50917	14669	165683	2154	42.4
BSTS18.bin.32	77.35	1.46	Neural Network (Specific Model)	11	0.902	5242	271.266	1615489	0.54	1794	None	341	1615489	0	4737.5	5242	2549	29075	2000	53.83
BSTS18.bin.37	98.09	1.64	Gradient Boost (General Model)	11	0.913	80653	343.189	3222713	0.46	2863	None	61	3222713	0	52831.4	80653	27515	321684	2134	45.64
BSTS18.bin.46	100	2.08	Gradient Boost (General Model)	11	0.866	23672	303.65	2527902	0.59	2409	None	185	2527902	0	13664.3	23672	5783	86303	2014	58.9
BSTS18.bin.47	99.98	0.04	Neural Network (Specific Model)	11	0.897	93496	331.011	2406874	0.55	2179	None	43	2406874	0	55973.8	93496	29727	266965	2611	54.72
BSTS18.bin.49	90.49	3.78	Gradient Boost (General Model)	11	0.918	11315	312.417	2350900	0.49	2306	None	297	2350900	0	7915.49	11315	3743	41981	2014	49.47
BSTS18.bin.5	78.17	1.79	Neural Network (Specific Model)	11	0.906	6442	276.691	2086999	0.58	2281	None	392	2086999	0	5323.98	6442	2914	26687	2008	58.5
BSTS18.bin.54	75.04	1.11	Gradient Boost (General Model)	11	0.911	7735	289.098	1528681	0.48	1609	None	255	1528681	0	5994.83	7735	3068	27606	2022	47.79
BSTS18.bin.60	78.95	2.68	Neural Network (Specific Model)	11	0.905	10746	329.191	1696417	0.47	1557	None	209	1696417	0	8116.83	10746	3861	65099	2000	47.43
BSTS18.bin.63	75.82	0.68	Neural Network (Specific Model)	11	0.919	17062	340.174	1621616	0.55	1463	None	129	1621616	0	12570.7	17062	6462	36590	2281	55.02
BSTS18.bin.77	92.72	2.38	Gradient Boost (General Model)	11	0.857	6203	274.448	1399850	0.5	1461	None	254	1399850	0	5511.22	6203	2938	35235	2032	50.25
BSTS18.bin.80	97.21	0.05	Gradient Boost (General Model)	11	0.864	32039	315.355	2044791	0.61	1873	None	90	2044791	0	22719.9	32039	10112	200678	2367	61.17
BSTS18.bin.83	84.51	0.56	Gradient Boost (General Model)	11	0.886	7197	305.374	1866900	0.45	1808	None	309	1866900	0	6041.75	7197	2889	47993	2011	44.82
BSTS18.bin.92	99.25	0.01	Neural Network (Specific Model)	11	0.829	12523	286.747	1910450	0.42	1843	None	199	1910450	0	9600.25	12523	4587	57765	2068	42.13
BSTS18.bin.97	87.26	0.78	Neural Network (Specific Model)	11	0.916	137352	343.966	1608198	0.57	1430	None	39	1608198	0	41235.8	137352	16628	252049	2363	57.42
BSTS2.bin.101	96.3	0.09	Gradient Boost (General Model)	11	0.884	25164	314.661	1540021	0.59	1444	None	98	1540021	0	15714.5	25164	7984	55303	2212	59.35
BSTS2.bin.105	75.57	3.97	Gradient Boost (General Model)	11	0.914	8364	302.628	1927539	0.44	1943	None	309	1927539	0	6237.99	8364	2984	46451	2014	44.33
BSTS2.bin.108	70.99	0.84	Gradient Boost (General Model)	11	0.904	8772	302.253	1382486	0.54	1380	None	193	1382486	0	7163.14	8772	3772	28768	2006	54.16
BSTS2.bin.110	56.99	0.31	Gradient Boost (General Model)	11	0.924	4137	283.249	1225102	0.48	1335	None	317	1225102	0	3864.68	4137	2325	16287	2003	48.36
BSTS2.bin.116	63.07	0.34	Neural Network (Specific Model)	11	0.899	36838	376.17	2339301	0.51	1865	None	81	2339301	0	28880.3	36838	16105	104005	2387	50.7
BSTS2.bin.124	58.99	0.67	Neural Network (Specific Model)	11	0.933	29113	374.1	1516695	0.5	1262	None	81	1516695	0	18724.6	29113	10065	58139	2736	49.75
BSTS2.bin.125	99.9	0.24	Neural Network (Specific Model)	11	0.906	49617	345.434	2338511	0.49	2049	None	69	2338511	0	33891.5	49617	17306	121414	3724	49.17
BSTS2.bin.126	85.26	2.39	Gradient Boost (General Model)	11	0.888	75199	316.52	3370376	0.43	3155	None	77	3370376	0	43771.1	75199	29268	235474	2116	43.37
BSTS2.bin.127	88.98	3.2	Neural Network (Specific Model)	11	0.927	11609	330.651	2183497	0.54	2044	None	239	2183497	0	9135.97	11609	4640	51254	2004	53.51
BSTS2.bin.130	86.2	2.87	Neural Network (Specific Model)	11	0.865	20109	295.39	3032619	0.45	2965	None	233	3032619	0	13015.5	20109	5737	73156	2018	44.7
BSTS2.bin.132	75.01	0.7	Neural Network (Specific Model)	11	0.91	64455	355.105	1837807	0.5	1573	None	39	1837807	0	47123.3	64455	27194	154207	5463	49.81
BSTS2.bin.134	60.2	1.56	Neural Network (Specific Model)	11	0.892	119908	304.551	1877432	0.48	1837	None	24	1877432	0	78226.3	119908	50529	189585	2122	47.78
BSTS2.bin.137	59.55	0.92	Neural Network (Specific Model)	11	0.908	30422	387.891	2093300	0.49	1635	None	103	2093300	0	20323.3	30422	10212	106671	2033	49.45
BSTS2.bin.139	72.98	1.39	Gradient Boost (General Model)	11	0.898	4864	279.885	2059959	0.48	2208	None	475	2059959	0	4336.76	4864	2465	20835	2001	48.47
BSTS2.bin.142	70.3	0.16	Gradient Boost (General Model)	11	0.868	4822	277.123	2009723	0.52	2101	None	450	2009723	0	4466.05	4822	2623	18551	2000	51.79
BSTS2.bin.26	52.03	0.03	Neural Network (Specific Model)	11	0.899	46759	344.144	1327483	0.42	1157	None	54	1327483	0	24583	46759	15706	123184	2042	42.3
BSTS2.bin.3	99.33	2.54	Gradient Boost (General Model)	11	0.894	49396	307.733	2474836	0.48	2399	None	85	2474836	0	29115.7	49396	15241	137971	2226	48.33
BSTS2.bin.35	70.38	1.72	Neural Network (Specific Model)	11	0.906	6737	312.509	1576718	0.51	1526	None	271	1576718	0	5818.15	6737	3071	22040	2014	50.96
BSTS2.bin.36	90.08	3.81	Neural Network (Specific Model)	11	0.933	20038	353.563	2317779	0.49	2041	None	183	2317779	0	12665.5	20038	5381	68786	2017	49.13
BSTS2.bin.4	97.83	1.06	Gradient Boost (General Model)	11	0.844	24215	312.391	3152103	0.44	2841	None	223	3152103	0	14135	24215	6054	93791	2025	44.24
BSTS2.bin.40	77.79	3.88	Gradient Boost (General Model)	11	0.938	8232	334.306	1754530	0.5	1646	None	271	1754530	0	6474.28	8232	3345	27500	2002	49.8
BSTS2.bin.41	79.32	2.22	Neural Network (Specific Model)	11	0.908	12601	330.71	2348617	0.46	2153	None	266	2348617	0	8829.39	12601	4094	65000	2037	45.82
BSTS2.bin.42	75.72	1.34	Neural Network (Specific Model)	11	0.908	25987	331.13	2113634	0.46	1936	None	119	2113634	0	17761.6	25987	10150	72298	2031	45.92
BSTS2.bin.5	67.12	1.32	Neural Network (Specific Model)	11	0.935	5757	316.762	1429212	0.55	1409	None	291	1429212	0	4911.38	5757	2764	16028	2011	55.11
BSTS2.bin.50	84.06	0.15	Neural Network (Specific Model)	11	0.873	17716	306.602	2563860	0.45	2436	None	229	2563860	0	11195.9	17716	4516	135903	2028	44.71
BSTS2.bin.51	75.6	0.14	Gradient Boost (General Model)	11	0.932	10012	332.081	1815823	0.44	1703	None	226	1815823	0	8034.62	10012	3750	31593	2074	44.38
BSTS2.bin.53	88.95	2.92	Gradient Boost (General Model)	11	0.923	7208	291.287	1657252	0.6	1753	None	285	1657252	0	5814.92	7208	3014	35430	2009	60.02
BSTS2.bin.56	82.54	2.55	Neural Network (Specific Model)	11	0.905	24530	336.775	2487447	0.53	2231	None	149	2487447	0	16694.3	24530	8342	84273	2018	52.52
BSTS2.bin.57	64.59	0.05	Neural Network (Specific Model)	11	0.905	10453	336.462	1708835	0.45	1534	None	228	1708835	0	7494.89	10453	3608	43600	2009	45.07
BSTS2.bin.60	94.87	3.55	Neural Network (Specific Model)	11	0.89	80758	337.226	2659842	0.66	2344	None	45	2659842	0	59107.6	80758	32015	174504	4632	66.21
BSTS2.bin.7	94.95	2.26	Gradient Boost (General Model)	11	0.877	17251	313.136	1949689	0.47	1822	None	158	1949689	0	12339.8	17251	5635	52036	2118	47.1
BSTS2.bin.77	94.82	0	Neural Network (Specific Model)	11	0.895	40533	355.771	2582366	0.5	2169	None	90	2582366	0	28693	40533	15216	116957	2936	49.91
BSTS2.bin.79	96.1	0.06	Gradient Boost (General Model)	11	0.904	45583	326.278	2201099	0.44	2036	None	75	2201099	0	29348	45583	15874	100132	3388	44.36
BSTS2.bin.8	83.59	3.74	Gradient Boost (General Model)	11	0.895	13901	313.491	2157604	0.61	2056	None	222	2157604	0	9718.94	13901	4113	91184	2099	60.84
BSTS2.bin.83	67.24	1.29	Gradient Boost (General Model)	11	0.9	4851	273.271	1601779	0.67	1763	None	371	1601779	0	4317.46	4851	2483	20587	2018	66.91
BSTS2.bin.84	99.92	0.02	Neural Network (Specific Model)	11	0.917	41133	349.398	2031065	0.48	1781	None	65	2031065	0	31247.2	41133	16647	201012	3666	48.01
BSTS2.bin.87	89.13	2.68	Gradient Boost (General Model)	11	0.913	8779	332.483	1970862	0.5	1808	None	284	1970862	0	6939.65	8779	3515	34335	2014	50.4
BSTS2.bin.88	67.83	3.28	Neural Network (Specific Model)	11	0.926	4998	299.486	1470355	0.58	1518	None	326	1470355	0	4510.29	4998	2554	24193	2004	57.65
BSTS2.bin.90	93.1	0.1	Neural Network (Specific Model)	11	0.924	40443	363.809	2009793	0.55	1703	None	77	2009793	0	26101.2	40443	13477	119509	2576	55.48
BSTS2.bin.97	83.88	1.17	Neural Network (Specific Model)	11	0.891	13040	334.51	2156978	0.49	1918	None	244	2156978	0	8840.07	13040	4320	33811	2020	49.22
BSTS3.bin.102	78.76	2.58	Gradient Boost (General Model)	11	0.928	12046	340.605	1377406	0.46	1253	None	169	1377406	0	8150.33	12046	3444	45585	2027	45.9
BSTS3.bin.105	91.49	0.56	Gradient Boost (General Model)	11	0.881	58848	329.992	2351263	0.57	2095	None	63	2351263	0	37321.6	58848	19823	174409	3332	56.8
BSTS3.bin.118	99.2	0.38	Neural Network (Specific Model)	11	0.902	43408	343.443	2521946	0.55	2212	None	97	2521946	0	25999.4	43408	12182	99518	2724	55.49
BSTS3.bin.121	95.55	0	Neural Network (Specific Model)	11	0.912	41660	315.755	2199725	0.54	2123	None	79	2199725	0	27844.6	41660	13620	124384	2023	54.44
BSTS3.bin.123	56.91	0.21	Neural Network (Specific Model)	11	0.909	20284	355.307	1550206	0.52	1324	None	113	1550206	0	13718.6	20284	5817	91738	2060	52.49
BSTS3.bin.132	81.88	0.22	Neural Network (Specific Model)	11	0.901	26515	356.852	1782725	0.45	1502	None	119	1782725	0	14980.9	26515	6481	136724	2140	45.22
BSTS3.bin.133	73.16	2.49	Neural Network (Specific Model)	11	0.906	58056	360.929	2766123	0.44	2317	None	79	2766123	0	35014.2	58056	17105	159396	3147	43.52
BSTS3.bin.140	92.2	0	Gradient Boost (General Model)	11	0.89	24298	315.615	2071450	0.48	1952	None	139	2071450	0	14902.5	24298	7163	53064	2147	48.02
BSTS3.bin.142	80.89	0.51	Gradient Boost (General Model)	11	0.911	7094	311.962	2133745	0.45	2080	None	376	2133745	0	5674.85	7094	2857	25070	2030	45.35
BSTS3.bin.145	92.12	0.08	Neural Network (Specific Model)	11	0.918	93337	352.531	2195356	0.56	1908	None	34	2195356	0	64569.3	93337	36877	206565	3243	55.58
BSTS3.bin.148	60.33	0.09	Neural Network (Specific Model)	11	0.905	16348	323.166	1539501	0.58	1441	None	123	1539501	0	12516.3	16348	6394	37751	2167	57.67
BSTS3.bin.152	70.92	0.51	Neural Network (Specific Model)	11	0.911	39768	354.398	1530140	0.54	1313	None	52	1530140	0	29425.8	39768	14810	75820	3880	54.31
BSTS3.bin.155	86.07	0.38	Neural Network (Specific Model)	11	0.905	20247	365.433	2265460	0.51	1872	None	155	2265460	0	14615.9	20247	7916	73995	2162	50.78
BSTS3.bin.159	62.13	0.24	Gradient Boost (General Model)	11	0.936	19525	337.942	517906	0.5	479	None	31	517906	0	16706.6	19525	8947	59291	2288	49.72
BSTS3.bin.16	89.52	0.23	Neural Network (Specific Model)	11	0.914	12531	348.968	1943974	0.56	1699	None	199	1943974	0	9768.71	12531	5329	39299	2018	56.43
BSTS3.bin.160	63.43	0.19	Neural Network (Specific Model)	11	0.915	107637	369.432	1499599	0.52	1240	None	23	1499599	0	65200	107637	47398	172196	8811	51.67
BSTS3.bin.164	82.47	0.02	Neural Network (Specific Model)	11	0.877	21548	311.339	2240508	0.44	2107	None	178	2240508	0	12587.1	21548	4430	116243	2043	44.31
BSTS3.bin.168	85.08	0.55	Gradient Boost (General Model)	11	0.874	21739	308.132	2909515	0.45	2754	None	237	2909515	0	12276.4	21739	5225	114659	2080	44.6
BSTS3.bin.169	60.93	0.02	Neural Network (Specific Model)	11	0.934	6008	311.864	1284813	0.5	1285	None	247	1284813	0	5201.67	6008	2717	22934	2011	49.9
BSTS3.bin.175	89.52	1.56	Neural Network (Specific Model)	11	0.916	45953	366.956	2735456	0.5	2280	None	87	2735456	0	31442	45953	15214	218097	2169	50.25
BSTS3.bin.19	50.55	0.06	Gradient Boost (General Model)	11	0.895	99431	363.961	948413	0.48	779	None	15	948413	0	63227.5	99431	36960	166644	4711	48.29
BSTS3.bin.25	70.82	1.31	Neural Network (Specific Model)	11	0.938	7908	346.824	1644999	0.51	1485	None	271	1644999	0	6070.11	7908	2907	46059	2007	51.21
BSTS3.bin.30	74.2	1.78	Neural Network (Specific Model)	11	0.912	29608	345.493	1780847	0.5	1569	None	101	1780847	0	17632.2	29608	8192	80376	2661	50.04
BSTS3.bin.31	88.04	0.07	Neural Network (Specific Model)	11	0.915	51852	360.648	2057432	0.53	1742	None	57	2057432	0	36095.3	51852	14058	145572	3975	52.95
BSTS3.bin.35	73.01	0.38	Neural Network (Specific Model)	11	0.934	113371	376.421	1806611	0.49	1498	None	24	1806611	0	75275.5	113371	52909	238355	2088	48.62
BSTS3.bin.42	66.41	0.73	Gradient Boost (General Model)	11	0.87	4132	261.33	1397128	0.53	1555	None	359	1397128	0	3891.72	4132	2432	11168	2035	52.76
BSTS3.bin.63	87.81	0.48	Neural Network (Specific Model)	11	0.869	43632	304.137	2708170	0.45	2584	None	129	2708170	0	20993.6	43632	9036	223100	2007	45.31
BSTS3.bin.65	68.37	2.02	Neural Network (Specific Model)	11	0.939	9554	350.031	1851650	0.56	1658	None	255	1851650	0	7261.37	9554	3748	26834	2020	56.45
BSTS3.bin.68	83.85	2.27	Neural Network (Specific Model)	11	0.917	8553	344	2264972	0.54	2015	None	333	2264972	0	6801.72	8553	3378	40428	2008	54.11
BSTS3.bin.72	71.58	1.68	Neural Network (Specific Model)	11	0.892	5047	291.934	1833278	0.56	1872	None	408	1833278	0	4493.33	5047	2631	16251	2001	55.96
BSTS3.bin.75	72.48	1.2	Gradient Boost (General Model)	11	0.865	4550	274.21	1926171	0.6	2030	None	462	1926171	0	4169.2	4550	2440	18627	2006	59.97
BSTS3.bin.8	59.95	0.49	Neural Network (Specific Model)	11	0.923	14606	328.888	1662670	0.51	1558	None	173	1662670	0	9610.81	14606	4076	49715	2039	50.55
BSTS3.bin.83	56.27	0.5	Neural Network (Specific Model)	11	0.892	4524	280.27	1411835	0.56	1500	None	352	1411835	0	4010.89	4524	2368	14530	2001	56.08
BSTS3.bin.84	88.92	2.31	Gradient Boost (General Model)	11	0.928	12389	318.54	1897922	0.51	1846	None	227	1897922	0	8360.89	12389	3382	59958	2013	50.9
BSTS3.bin.85	71.37	3.48	Neural Network (Specific Model)	11	0.891	5418	304.804	2169072	0.66	2115	None	463	2169072	0	4684.82	5418	2508	22911	2001	65.8
BSTS3.bin.92	86.6	1.2	Gradient Boost (General Model)	11	0.937	9141	352.562	1932429	0.55	1714	None	273	1932429	0	7078.49	9141	3551	27448	2039	55.37
BSTS3.bin.93	90.51	0.08	Neural Network (Specific Model)	11	0.9	51805	347.629	2510876	0.49	2171	None	80	2510876	0	31386	51805	14594	133907	2396	48.98
BSTS3.bin.94	76.43	1.46	Neural Network (Specific Model)	11	0.899	8909	310.503	1939115	0.48	1875	None	285	1939115	0	6803.91	8909	3289	37259	2006	48.07
BSTS3.bin.95	67.6	0.14	Neural Network (Specific Model)	11	0.899	31953	354.462	1726389	0.52	1462	None	71	1726389	0	24315.3	31953	12711	99354	3428	52.24
BSTS3.bin.97	89.42	0.13	Gradient Boost (General Model)	11	0.885	97525	322.05	1621767	0.41	1487	None	29	1621767	0	55923	97525	30120	151161	4266	40.88
BSTS3.bin.99	90.6	1.52	Neural Network (Specific Model)	11	0.924	16639	340.436	2221162	0.53	2014	None	190	2221162	0	11690.3	16639	5416	88576	2018	53.41
BSTS4.bin.10	63.8	0.06	Neural Network (Specific Model)	11	0.938	5309	327.107	1316435	0.56	1261	None	279	1316435	0	4718.4	5309	2539	20835	2007	56.1
BSTS4.bin.105	73.25	2.55	Gradient Boost (General Model)	11	0.892	5649	279.025	1832038	0.67	1957	None	359	1832038	0	5103.17	5649	2647	30163	2009	67.49
BSTS4.bin.14	78.91	0.18	Gradient Boost (General Model)	11	0.907	11340	323.445	1411209	0.55	1320	None	171	1411209	0	8252.68	11340	3710	49764	2067	54.54
BSTS4.bin.15	96.74	2.97	Gradient Boost (General Model)	11	0.844	13791	308.671	3116113	0.59	2844	None	323	3116113	0	9647.41	13791	4647	47068	2009	58.56
BSTS4.bin.32	54.82	0.05	Neural Network (Specific Model)	11	0.918	3573	285.549	1075288	0.56	1155	None	313	1075288	0	3435.42	3573	2214	13587	2011	56.25
BSTS4.bin.38	67.6	1.79	Neural Network (Specific Model)	11	0.911	5278	288.871	1819580	0.46	1917	None	398	1819580	0	4571.81	5278	2629	14944	2001	45.61
BSTS4.bin.57	96.87	1.38	Gradient Boost (General Model)	11	0.916	42592	332.515	2638360	0.5	2427	None	97	2638360	0	27199.6	42592	11722	150054	2499	50.08
BSTS4.bin.62	72.85	3.97	Gradient Boost (General Model)	11	0.896	3704	276.412	1497101	0.59	1621	None	423	1497101	0	3539.25	3704	2265	17608	2001	58.93
BSTS4.bin.66	63.36	0.71	Neural Network (Specific Model)	11	0.933	4986	335.647	1329201	0.56	1233	None	298	1329201	0	4460.41	4986	2618	20009	2000	55.99
BSTS4.bin.7	92.75	3.97	Gradient Boost (General Model)	11	0.897	13513	301.694	2119388	0.63	2102	None	231	2119388	0	9174.84	13513	4258	41359	2000	62.64
BSTS4.bin.81	55.26	0.16	Neural Network (Specific Model)	11	0.939	5041	333.592	1247887	0.56	1173	None	273	1247887	0	4571.01	5041	2540	20250	2005	55.93
BSTS4.bin.89	72.7	3.03	Neural Network (Specific Model)	11	0.938	6000	313.463	1663979	0.55	1662	None	323	1663979	0	5151.64	6000	2707	30292	2006	54.71
BSTS5.bin.111	96.5	0.24	Gradient Boost (General Model)	11	0.877	28149	307.565	2139403	0.55	2039	None	131	2139403	0	16331.3	28149	7756	112596	2060	55.16
BSTS5.bin.117	90.63	0	Gradient Boost (General Model)	11	0.869	20111	317.12	2431480	0.61	2225	None	176	2431480	0	13815.2	20111	6729	67884	2032	61.12
BSTS5.bin.124	81.2	0.05	Gradient Boost (General Model)	11	0.862	14991	309.872	1460409	0.5	1356	None	128	1460409	0	11409.5	14991	5807	62113	2022	49.89
BSTS5.bin.125	70.11	1.95	Neural Network (Specific Model)	11	0.901	5326	290.379	1697661	0.48	1759	None	382	1697661	0	4444.14	5326	2353	14812	2013	48.38
BSTS5.bin.126	82.23	2.09	Neural Network (Specific Model)	11	0.907	8762	310.754	1945552	0.55	1897	None	271	1945552	0	7179.16	8762	3591	52533	2049	55.3
BSTS5.bin.136	99.18	1.3	Neural Network (Specific Model)	11	0.896	17509	354.389	2270634	0.53	1915	None	180	2270634	0	12614.6	17509	6183	62776	2374	52.99
BSTS5.bin.141	59.98	1.06	Neural Network (Specific Model)	11	0.89	6256	284.555	1588206	0.62	1659	None	307	1588206	0	5173.31	6256	2625	32308	2006	61.89
BSTS5.bin.151	79.81	0.27	Gradient Boost (General Model)	11	0.88	8974	307.707	1591848	0.48	1520	None	231	1591848	0	6891.12	8974	3446	35074	2005	48
BSTS5.bin.155	70.76	0.01	Neural Network (Specific Model)	11	0.931	6791	325.768	1493015	0.52	1424	None	257	1493015	0	5809.4	6791	3075	22473	2013	52.16
BSTS5.bin.156	85.95	2.76	Gradient Boost (General Model)	11	0.885	11674	300.547	2733789	0.56	2690	None	315	2733789	0	8678.7	11674	4440	37039	2005	55.9
BSTS5.bin.161	62.15	1.8	Neural Network (Specific Model)	11	0.896	5204	272.444	1656023	0.49	1817	None	352	1656023	0	4704.61	5204	2653	28934	2008	49.34
BSTS5.bin.165	94.04	0.02	Gradient Boost (General Model)	11	0.908	59262	318.099	1722609	0.42	1641	None	39	1722609	0	44169.5	59262	25767	148058	2243	42.29
BSTS5.bin.17	71.7	1.76	Gradient Boost (General Model)	11	0.898	6633	297.675	1682804	0.56	1694	None	298	1682804	0	5646.99	6633	2817	31525	2026	55.64
BSTS5.bin.180	51.77	0.12	Neural Network (Specific Model)	11	0.9	39896	329.636	1362155	0.51	1243	None	53	1362155	0	25701	39896	12311	115909	2378	51.21
BSTS5.bin.2	67.5	1.4	Neural Network (Specific Model)	11	0.915	5111	291.616	1242156	0.56	1301	None	268	1242156	0	4634.91	5111	2564	22104	2005	56.29
BSTS5.bin.38	75.54	0.72	Neural Network (Specific Model)	11	0.925	22011	343.813	1507107	0.48	1355	None	109	1507107	0	13826.7	22011	6177	66159	2005	48.34
BSTS5.bin.46	98.1	2.45	Gradient Boost (General Model)	11	0.868	11809	295.68	2460302	0.54	2415	None	292	2460302	0	8425.69	11809	3888	61394	2017	53.58
BSTS5.bin.6	90.27	1.35	Neural Network (Specific Model)	11	0.927	14396	335.225	1907001	0.57	1762	None	194	1907001	0	9829.9	14396	4617	54518	2022	57.31
BSTS5.bin.80	80.94	3.6	Gradient Boost (General Model)	11	0.929	7028	347.071	2348891	0.54	2099	None	395	2348891	0	5946.56	7028	3177	27925	2004	54.29
BSTS5.bin.90	91.96	1.9	Neural Network (Specific Model)	11	0.904	18722	333.312	1920299	0.51	1739	None	145	1920299	0	13243.4	18722	6700	72367	2087	50.73
BSTS5.bin.92	79.74	3.69	Neural Network (Specific Model)	11	0.933	8130	339.812	1818890	0.54	1668	None	287	1818890	0	6337.6	8130	3156	29982	2024	54.18
BSTS6.bin.102	85.96	3.57	Gradient Boost (General Model)	11	0.876	28254	298.67	2596021	0.53	2541	None	142	2596021	0	18281.8	28254	9777	75013	2072	52.76
BSTS6.bin.103	86.52	1.82	Gradient Boost (General Model)	11	0.923	8540	290.965	1472261	0.6	1558	None	223	1472261	0	6602.07	8540	3173	30028	2008	60.28
BSTS6.bin.107	76.64	0.82	Neural Network (Specific Model)	11	0.934	8313	346.58	1771635	0.56	1594	None	267	1771635	0	6635.34	8313	3359	30474	2000	55.86
BSTS6.bin.110	72.68	2.21	Gradient Boost (General Model)	11	0.89	7720	293.533	1626698	0.58	1650	None	271	1626698	0	6002.58	7720	3042	24059	2001	57.59
BSTS6.bin.116	75.56	1.23	Gradient Boost (General Model)	11	0.899	4525	280.785	1814113	0.58	1940	None	431	1814113	0	4209.08	4525	2438	20861	2000	58.15
BSTS6.bin.118	74.76	3.19	Neural Network (Specific Model)	11	0.928	6588	322.685	2053071	0.54	1972	None	370	2053071	0	5548.84	6588	2887	25718	2000	53.8
BSTS6.bin.122	92.47	0.72	Neural Network (Specific Model)	11	0.923	18545	343.045	2697354	0.48	2423	None	215	2697354	0	12545.8	18545	6286	70100	2259	47.69
BSTS6.bin.127	56	0.42	Neural Network (Specific Model)	11	0.902	12275	311.601	1390190	0.52	1344	None	156	1390190	0	8911.47	12275	4510	55811	2002	52.36
BSTS6.bin.129	61.92	0.21	Gradient Boost (General Model)	11	0.863	4549	278.134	1992725	0.6	2064	None	484	1992725	0	4117.2	4549	2374	19886	2002	60.34
BSTS6.bin.13	54.87	0.19	Neural Network (Specific Model)	11	0.926	7082	321.132	1382198	0.46	1331	None	233	1382198	0	5932.18	7082	3001	19403	2001	45.52
BSTS6.bin.131	78.74	0.68	Neural Network (Specific Model)	11	0.919	13483	314.907	1811406	0.4	1764	None	170	1811406	0	10655.3	13483	5368	50298	2028	39.87
BSTS6.bin.140	74.53	3.35	Gradient Boost (General Model)	11	0.892	19644	317.892	1476062	0.59	1382	None	122	1476062	0	12098.9	19644	5597	72452	2016	59
BSTS6.bin.149	88.47	0.04	Gradient Boost (General Model)	11	0.897	121891	315.768	1766620	0.4	1675	None	34	1766620	0	51959.4	121891	24402	251379	2032	40.22
BSTS6.bin.153	83.38	4.57	Gradient Boost (General Model)	11	0.858	5569	267.754	2105249	0.53	2255	None	445	2105249	0	4730.9	5569	2601	21100	2001	53.5
BSTS6.bin.158	55.1	0.01	Gradient Boost (General Model)	11	0.853	4075	240.467	368332	0.4	437	None	94	368332	0	3918.43	4075	2366	11787	2011	39.63
BSTS6.bin.159	56.07	0.07	Neural Network (Specific Model)	11	0.905	131739	348.953	1220111	0.44	1057	None	17	1220111	0	71771.2	131739	32570	446347	5856	44.38
BSTS6.bin.18	100	3.8	Gradient Boost (General Model)	11	0.885	51196	304.375	3054115	0.51	2964	None	78	3054115	0	39155.3	51196	22871	237668	2499	50.51
BSTS6.bin.19	85.97	0.89	Gradient Boost (General Model)	11	0.909	10118	298.263	1884931	0.48	1918	None	240	1884931	0	7853.88	10118	4106	33028	2019	47.55
BSTS6.bin.22	76.01	4.2	Gradient Boost (General Model)	11	0.894	4799	286.422	1951236	0.44	2034	None	451	1951236	0	4326.47	4799	2359	26218	2000	43.58
BSTS6.bin.24	68.45	2.75	Neural Network (Specific Model)	11	0.913	6833	344.628	2456021	0.52	2171	None	413	2456021	0	5946.78	6833	3050	28208	2015	51.77
BSTS6.bin.26	99.92	0.36	Neural Network (Specific Model)	11	0.916	77176	326.269	2365278	0.54	2218	None	66	2365278	0	35837.6	77176	19739	216403	2100	54.05
BSTS6.bin.27	83.08	2.1	Neural Network (Specific Model)	11	0.897	17297	311.491	2317868	0.51	2229	None	191	2317868	0	12135.4	17297	5815	65754	2031	51.08
BSTS6.bin.28	53.69	0.44	Neural Network (Specific Model)	11	0.897	4338	265.119	1485786	0.67	1680	None	353	1485786	0	4209.03	4338	2389	23613	2003	66.64
BSTS6.bin.30	64.53	0.58	Gradient Boost (General Model)	11	0.901	126647	342.77	1030179	0.48	904	None	14	1030179	0	73584.2	126647	41819	256534	11987	47.85
BSTS6.bin.31	77.93	0.46	Neural Network (Specific Model)	11	0.9	66223	337.319	2136371	0.48	1904	None	59	2136371	0	36209.7	66223	17915	129306	2531	48.49
BSTS6.bin.35	84.18	2.31	Neural Network (Specific Model)	11	0.881	15618	328.802	2833236	0.43	2535	None	264	2833236	0	10732	15618	5056	85054	2022	42.71
BSTS6.bin.36	89.73	1.32	Neural Network (Specific Model)	11	0.868	44797	318.965	2427603	0.51	2207	None	91	2427603	0	26677	44797	14026	144488	2100	51.19
BSTS6.bin.40	88.65	0.18	Gradient Boost (General Model)	11	0.873	7345	309.958	2012244	0.52	1892	None	320	2012244	0	6288.26	7345	3384	24092	2017	51.62
BSTS6.bin.46	76.54	3.24	Neural Network (Specific Model)	11	0.897	7426	300.042	1813779	0.48	1812	None	300	1813779	0	6045.93	7426	2981	31273	2014	47.68
BSTS6.bin.47	86.73	4.19	Gradient Boost (General Model)	11	0.929	8616	316.09	1748880	0.45	1715	None	256	1748880	0	6831.56	8616	3423	44396	2003	44.78
BSTS6.bin.57	85.76	4.94	Neural Network (Specific Model)	11	0.925	12415	339.321	2165709	0.51	1973	None	235	2165709	0	9215.78	12415	4596	41080	2083	50.5
BSTS6.bin.6	88.47	1.66	Neural Network (Specific Model)	11	0.9	11171	352.976	2087175	0.52	1775	None	236	2087175	0	8843.96	11171	4827	52399	2013	52.12
BSTS6.bin.61	69.09	2.91	Neural Network (Specific Model)	11	0.891	7361	323.706	1361321	0.61	1250	None	221	1361321	0	6159.82	7361	3029	35186	2005	61.07
BSTS6.bin.64	64.53	0.72	Gradient Boost (General Model)	11	0.868	3638	267.464	1873570	0.46	2030	None	520	1873570	0	3603.02	3638	2331	10332	2001	46.07
BSTS6.bin.66	75.25	1.66	Gradient Boost (General Model)	11	0.872	5932	271.108	1768965	0.54	1900	None	333	1768965	0	5312.21	5932	2858	34783	2008	54.18
BSTS6.bin.71	85.03	1.29	Gradient Boost (General Model)	11	0.916	12547	340.564	1972008	0.46	1771	None	224	1972008	0	8803.61	12547	3863	42724	2021	45.86
BSTS6.bin.72	83.04	1.41	Neural Network (Specific Model)	11	0.913	24508	336.274	2406623	0.44	2180	None	151	2406623	0	15937.9	24508	7337	97698	2046	44.32
BSTS6.bin.74	72.91	0.07	Neural Network (Specific Model)	11	0.88	93171	316.31	1828138	0.52	1700	None	34	1828138	0	53768.8	93171	29021	151092	2111	52.13
BSTS6.bin.83	84.61	0	Neural Network (Specific Model)	11	0.876	20782	309.694	2201739	0.44	2079	None	194	2201739	0	11349.2	20782	4636	103564	2002	44.13
BSTS6.bin.9	90.64	1.06	Gradient Boost (General Model)	11	0.86	25115	312.222	2273980	0.6	2094	None	140	2273980	0	16242.7	25115	7458	151212	2026	59.51
BSTS6.bin.90	90.12	3.88	Neural Network (Specific Model)	11	0.919	12501	335.794	2132037	0.53	1947	None	225	2132037	0	9475.72	12501	4638	34485	2116	53.42
BSTS6.bin.93	72.22	0.14	Gradient Boost (General Model)	11	0.925	5437	327.572	1338986	0.51	1262	None	265	1338986	0	5052.78	5437	2844	21294	2008	50.55
BSTS6.bin.95	63.46	1.09	Neural Network (Specific Model)	11	0.903	26724	330.496	2142348	0.44	1955	None	153	2142348	0	14002.3	26724	5048	121003	2023	44.35
BSTS7.bin.10	73.59	3.15	Neural Network (Specific Model)	11	0.907	20068	347.83	1999959	0.45	1740	None	149	1999959	0	13422.5	20068	6521	62097	2010	44.86
BSTS7.bin.101	61.77	0.11	Gradient Boost (General Model)	11	0.889	85064	361.09	1117039	0.46	918	None	20	1117039	0	55851.9	85064	33734	120255	7033	46.28
BSTS7.bin.103	77.38	0.42	Neural Network (Specific Model)	11	0.895	85144	340.03	1875895	0.5	1649	None	35	1875895	0	53597	85144	25151	233965	4138	50.27
BSTS7.bin.11	93.55	0.03	Neural Network (Specific Model)	11	0.897	69779	333.48	2987640	0.45	2685	None	80	2987640	0	37345.5	69779	17062	174806	2020	45
BSTS7.bin.112	80.39	0.01	Neural Network (Specific Model)	11	0.901	36757	311.492	1962203	0.59	1895	None	82	1962203	0	23929.3	36757	13063	98826	2036	58.89
BSTS7.bin.114	81.02	1.56	Gradient Boost (General Model)	11	0.896	18847	322.815	2133068	0.45	1978	None	166	2133068	0	12849.8	18847	6001	61117	2137	44.79
BSTS7.bin.121	71.1	1.21	Neural Network (Specific Model)	11	0.902	49821	308.666	1605961	0.52	1566	None	43	1605961	0	37347.9	49821	20008	146672	2327	52.28
BSTS7.bin.126	78.93	1.16	Neural Network (Specific Model)	11	0.936	47004	372.871	1927683	0.49	1616	None	67	1927683	0	28771.4	47004	15817	111876	2330	49.48
BSTS7.bin.127	77.03	2.07	Neural Network (Specific Model)	11	0.898	10165	289.104	1914712	0.49	1984	None	257	1914712	0	7450.24	10165	3725	53430	2001	48.82
BSTS7.bin.129	92.79	0.23	Neural Network (Specific Model)	11	0.922	21502	376.037	2832475	0.53	2317	None	187	2832475	0	15146.9	21502	7518	87179	2205	53.32
BSTS7.bin.131	83.6	4.09	Gradient Boost (General Model)	11	0.855	7767	283.807	2918228	0.45	2936	None	480	2918228	0	6079.64	7767	2898	32095	2007	44.95
BSTS7.bin.15	57.43	0.18	Gradient Boost (General Model)	11	0.869	55212	309.44	1226100	0.53	1149	None	31	1226100	0	39551.6	55212	18832	220095	3116	52.74
BSTS7.bin.17	54.39	0	Neural Network (Specific Model)	11	0.909	802690	336.462	1180602	0.41	1065	None	7	1180602	0	168657	802690	71887	802690	2360	41.07
BSTS7.bin.25	58.47	0.01	Gradient Boost (General Model)	11	0.901	154776	313.867	789635	0.42	757	None	6	789635	0	131606	154776	76764	284170	46778	42.23
BSTS7.bin.26	65.87	0.33	Neural Network (Specific Model)	11	0.906	66639	346.096	1699533	0.5	1486	None	39	1699533	0	43577.8	66639	21987	109332	3229	50.22
BSTS7.bin.27	92.76	0.02	Gradient Boost (General Model)	11	0.884	21546	313.003	2501677	0.56	2360	None	176	2501677	0	14214.1	21546	7068	76958	2128	55.75
BSTS7.bin.28	97.09	0.47	Gradient Boost (General Model)	11	0.917	58674	343.627	2895489	0.48	2579	None	74	2895489	0	39128.2	58674	26421	145644	2231	48.27
BSTS7.bin.3	72.69	3.37	Gradient Boost (General Model)	11	0.913	5704	294.65	1209984	0.56	1252	None	247	1209984	0	4898.72	5704	2680	33404	2037	56.03
BSTS7.bin.32	91.62	3.28	Neural Network (Specific Model)	11	0.871	59467	326.269	3587708	0.41	3196	None	103	3587708	0	34832.1	59467	19652	146975	2015	41.42
BSTS7.bin.34	83.84	1.28	Neural Network (Specific Model)	11	0.896	11344	308.438	2159961	0.48	2094	None	252	2159961	0	8571.27	11344	4235	56551	2065	47.57
BSTS7.bin.4	83.09	1.71	Neural Network (Specific Model)	11	0.931	13717	344.038	1915988	0.53	1731	None	186	1915988	0	10301	13717	5482	56308	2045	53.25
BSTS7.bin.47	57.86	0.97	Gradient Boost (General Model)	11	0.948	3584	291.287	775896	0.54	843	None	222	775896	0	3495.03	3584	2278	9278	2000	54.16
BSTS7.bin.49	75.32	0.22	Neural Network (Specific Model)	11	0.911	12671	316.76	1921477	0.57	1846	None	199	1921477	0	9655.66	12671	4691	45235	2120	57.33
BSTS7.bin.50	89.46	4.26	Gradient Boost (General Model)	11	0.874	7255	278.243	1830656	0.54	1919	None	312	1830656	0	5867.49	7255	2861	24171	2025	53.74
BSTS7.bin.51	75.32	0.84	Gradient Boost (General Model)	11	0.933	5329	304.805	1650889	0.54	1687	None	345	1650889	0	4785.19	5329	2747	27347	2016	54.35
BSTS7.bin.54	81.36	3.4	Gradient Boost (General Model)	11	0.926	6368	306.096	1669256	0.57	1686	None	312	1669256	0	5350.18	6368	2794	24836	2004	57.29
BSTS7.bin.55	80.32	2.62	Neural Network (Specific Model)	11	0.914	14546	334.442	2297458	0.46	2097	None	235	2297458	0	9776.42	14546	4368	57146	2032	45.61
BSTS7.bin.56	83.89	0.64	Neural Network (Specific Model)	11	0.888	14278	324.347	2042428	0.55	1866	None	193	2042428	0	10582.5	14278	5766	47328	2025	54.93
BSTS7.bin.60	87.79	0.27	Neural Network (Specific Model)	11	0.901	11479	317.343	1747893	0.48	1657	None	200	1747893	0	8739.46	11479	4092	71038	2022	48.01
BSTS7.bin.62	75.04	2.87	Gradient Boost (General Model)	11	0.921	6572	306.929	1867236	0.45	1872	None	335	1867236	0	5573.84	6572	2786	30516	2005	45.38
BSTS7.bin.64	63.02	0.14	Neural Network (Specific Model)	11	0.908	31691	358.196	1407569	0.48	1191	None	58	1407569	0	24268.4	31691	13512	107669	2244	47.8
BSTS7.bin.65	93.84	0.4	Gradient Boost (General Model)	11	0.89	28741	329.927	1847890	0.48	1664	None	90	1847890	0	20532.1	28741	10093	96207	2830	47.78
BSTS7.bin.68	83.19	0.91	Neural Network (Specific Model)	11	0.905	28427	322.664	2420999	0.46	2268	None	138	2420999	0	17543.5	28427	9316	78082	2152	45.54
BSTS7.bin.7	85.9	4.34	Gradient Boost (General Model)	11	0.886	6485	283.654	2086634	0.58	2177	None	374	2086634	0	5579.24	6485	2935	21388	2002	58.25
BSTS7.bin.73	82.08	3.72	Gradient Boost (General Model)	11	0.9	20703	322.739	2337527	0.4	2176	None	231	2337527	0	10119.2	20703	3404	86456	2005	39.8
BSTS7.bin.74	62.97	0.1	Gradient Boost (General Model)	11	0.9	19369	337.729	1555793	0.46	1383	None	116	1555793	0	13412	19369	6239	50403	2038	45.88
BSTS7.bin.75	85.24	2.76	Neural Network (Specific Model)	11	0.915	13916	347.736	2072141	0.5	1821	None	188	2072141	0	11022	13916	5624	54188	2037	50.09
BSTS7.bin.79	85.13	0.25	Neural Network (Specific Model)	11	0.917	18368	339.526	1961490	0.54	1770	None	142	1961490	0	13813.3	18368	6953	75784	2374	53.95
BSTS7.bin.8	53.25	0.65	Neural Network (Specific Model)	11	0.932	4621	297.675	1106719	0.52	1157	None	248	1106719	0	4462.58	4621	2611	18424	2020	51.51
BSTS7.bin.84	76.51	4.81	Gradient Boost (General Model)	11	0.888	14397	316.62	2102288	0.62	1969	None	198	2102288	0	10617.6	14397	4840	58528	2009	61.56
BSTS7.bin.85	51.57	0.01	Gradient Boost (General Model)	11	0.868	3880	248.664	351560	0.4	411	None	96	351560	0	3662.08	3880	2304	11243	2013	39.77
BSTS7.bin.88	70.62	0.21	Neural Network (Specific Model)	11	0.915	17465	345.958	1690237	0.5	1493	None	144	1690237	0	11737.8	17465	5396	74810	2005	50.29
BSTS7.bin.91	84.98	1.1	Gradient Boost (General Model)	11	0.877	100677	329.446	3564363	0.5	3167	None	61	3564363	0	58432.2	100677	34317	229999	2053	50.03
BSTS8.bin.10	85.44	0.03	Neural Network (Specific Model)	11	0.924	11830	331.448	1794785	0.57	1671	None	203	1794785	0	8841.31	11830	4380	55151	2024	57.4
BSTS8.bin.110	80.31	1.92	Neural Network (Specific Model)	11	0.914	16133	356.726	2560381	0.5	2191	None	236	2560381	0	10849.1	16133	4696	80018	2004	50.12
BSTS8.bin.112	71.36	3.59	Neural Network (Specific Model)	11	0.851	5704	293.69	1983210	0.46	1917	None	405	1983210	0	4896.81	5704	2551	25302	2007	45.85
BSTS8.bin.113	52.36	0.06	Gradient Boost (General Model)	11	0.892	3627	269.322	971637	0.55	1074	None	271	971637	0	3585.38	3627	2466	12668	2001	54.57
BSTS8.bin.116	98.68	0.95	Gradient Boost (General Model)	11	0.876	61183	309.555	3512799	0.44	3317	None	95	3512799	0	36976.8	61183	20755	291807	2004	43.66
BSTS8.bin.122	87.37	2.33	Neural Network (Specific Model)	11	0.902	8712	303.649	1976211	0.55	1961	None	302	1976211	0	6543.75	8712	3111	25532	2007	55.23
BSTS8.bin.129	82.66	0.08	Neural Network (Specific Model)	11	0.921	9899	336.102	1883466	0.51	1724	None	243	1883466	0	7750.89	9899	3800	35818	2021	51.06
BSTS8.bin.131	98.65	0	Neural Network (Specific Model)	11	0.859	17487	317.112	2188679	0.53	1980	None	197	2188679	0	11110	17487	4926	94459	2021	52.91
BSTS8.bin.134	73.27	1.72	Neural Network (Specific Model)	11	0.924	149616	357.108	1653795	0.48	1430	None	17	1653795	0	97282.1	149616	53051	296847	14969	47.55
BSTS8.bin.137	84.65	2.67	Neural Network (Specific Model)	11	0.927	10133	350.609	2234799	0.54	1973	None	285	2234799	0	7841.4	10133	3821	42250	2000	54.01
BSTS8.bin.138	60.72	0.76	Gradient Boost (General Model)	11	0.895	4629	302.84	1129080	0.48	1114	None	269	1129080	0	4197.32	4629	2494	13299	2000	48.26
BSTS8.bin.15	72.96	0.15	Neural Network (Specific Model)	11	0.914	19959	342.503	1900126	0.49	1693	None	140	1900126	0	13572.3	19959	7050	56954	2170	49.19
BSTS8.bin.2	82.1	0.04	Neural Network (Specific Model)	11	0.877	20212	309.965	2347114	0.53	2216	None	193	2347114	0	12161.2	20212	5664	101535	2008	53.49
BSTS8.bin.21	68.69	0.43	Neural Network (Specific Model)	11	0.878	18904	346.148	1645774	0.49	1394	None	120	1645774	0	13714.8	18904	7940	48903	2100	48.87
BSTS8.bin.29	66.12	1.82	Neural Network (Specific Model)	11	0.903	6772	342.543	1572524	0.58	1383	None	283	1572524	0	5556.62	6772	2846	20537	2007	58.15
BSTS8.bin.3	79.92	0.54	Neural Network (Specific Model)	11	0.916	10164	343.006	1944126	0.51	1733	None	251	1944126	0	7745.52	10164	3816	31501	2002	50.59
BSTS8.bin.30	98.01	0.28	Neural Network (Specific Model)	11	0.895	36033	356.524	1921177	0.53	1610	None	76	1921177	0	25278.6	36033	16420	166207	2413	52.59
BSTS8.bin.39	78.74	3.72	Neural Network (Specific Model)	11	0.916	10057	330.327	2222679	0.47	2057	None	304	2222679	0	7311.44	10057	3431	47927	2006	46.53
BSTS8.bin.43	66.35	0.01	Neural Network (Specific Model)	11	0.934	73645	365.983	1537620	0.54	1311	None	24	1537620	0	64067.5	73645	39130	277304	7293	53.95
BSTS8.bin.45	86.37	0.77	Gradient Boost (General Model)	11	0.879	15815	298.025	1559972	0.41	1536	None	165	1559972	0	9454.38	15815	4148	58007	2008	41.09
BSTS8.bin.46	51.1	0.18	Neural Network (Specific Model)	11	0.89	13772	331.175	1293807	0.48	1160	None	138	1293807	0	9375.41	13772	4170	66334	2010	48.4
BSTS8.bin.47	96.22	0.1	Gradient Boost (General Model)	11	0.915	34025	349.99	1714766	0.55	1496	None	103	1714766	0	16648.2	34025	6514	90410	2051	55.48
BSTS8.bin.49	85.9	1.1	Neural Network (Specific Model)	11	0.894	10620	311.446	2126150	0.48	2039	None	252	2126150	0	8437.1	10620	4272	42025	2018	48.14
BSTS8.bin.55	51.73	0.34	Neural Network (Specific Model)	11	0.932	4640	322.863	1436105	0.55	1384	None	335	1436105	0	4286.88	4640	2493	24267	2003	54.54
BSTS8.bin.6	95.14	1.59	Gradient Boost (General Model)	11	0.902	22287	333.372	1570015	0.6	1418	None	113	1570015	0	13893.9	22287	5621	104348	2107	59.84
BSTS8.bin.62	70.36	0.87	Neural Network (Specific Model)	11	0.902	26991	338.554	1520139	0.47	1351	None	102	1520139	0	14903.3	26991	6912	67410	2004	46.69
BSTS8.bin.63	78.43	3.73	Neural Network (Specific Model)	11	0.903	9293	313.136	2154508	0.47	2076	None	315	2154508	0	6839.71	9293	3173	28284	2002	46.52
BSTS8.bin.73	78.26	1	Gradient Boost (General Model)	11	0.897	6438	293.643	1513758	0.57	1544	None	273	1513758	0	5544.9	6438	3083	22944	2021	57.1
BSTS8.bin.77	79.59	2.85	Neural Network (Specific Model)	11	0.922	10157	333.468	1971899	0.53	1822	None	252	1971899	0	7825	10157	3942	43156	2000	53.28
BSTS8.bin.90	84.83	0.48	Neural Network (Specific Model)	11	0.888	14094	316.995	2199376	0.55	2057	None	215	2199376	0	10229.7	14094	5010	44792	2022	54.89
BSTS8.bin.95	84.29	2.41	Neural Network (Specific Model)	11	0.926	10624	332.267	2079061	0.54	1934	None	254	2079061	0	8185.28	10624	4309	30441	2049	54.07
BSTS8.bin.96	98.84	2.79	Gradient Boost (General Model)	11	0.893	26686	368.248	2251436	0.53	1821	None	123	2251436	0	18304.4	26686	9569	65713	2168	52.81
BSTS8.bin.97	63.34	0.71	Neural Network (Specific Model)	11	0.896	10237	335.91	1590355	0.49	1416	None	200	1590355	0	7951.77	10237	3535	44292	2102	49.23
BSTS8.bin.98	74.19	4.47	Gradient Boost (General Model)	11	0.882	4785	261.386	2182202	0.41	2460	None	505	2182202	0	4321.19	4785	2348	30319	2009	41.1
BSTS8.bin.99	67.79	3.37	Gradient Boost (General Model)	11	0.934	5148	302.871	1219375	0.56	1256	None	260	1219375	0	4689.9	5148	2726	19486	2046	55.8
BSTS9.bin.10	80.43	1.18	Neural Network (Specific Model)	11	0.909	13480	316.381	2182053	0.46	2093	None	231	2182053	0	9446.12	13480	4279	50759	2052	45.91
BSTS9.bin.104	77.91	0.08	Neural Network (Specific Model)	11	0.918	10757	332.859	2171641	0.44	2001	None	263	2171641	0	8257.19	10757	3916	44346	2000	44.23
BSTS9.bin.111	94.66	0.12	Gradient Boost (General Model)	11	0.856	27934	316.235	2701776	0.59	2441	None	147	2701776	0	18379.4	27934	9836	100313	2019	59.29
BSTS9.bin.116	83.63	0.17	Neural Network (Specific Model)	11	0.905	55820	336.353	2223444	0.48	1997	None	71	2223444	0	31316.1	55820	13826	144378	2357	48.44
BSTS9.bin.117	69.85	2.99	Neural Network (Specific Model)	11	0.928	5557	322.812	1939749	0.54	1862	None	376	1939749	0	5158.91	5557	2954	20178	2018	54
BSTS9.bin.118	72.85	0.04	Neural Network (Specific Model)	11	0.912	34849	337.647	1544177	0.46	1392	None	99	1544177	0	15597.8	34849	6741	69301	2027	45.6
BSTS9.bin.16	80.41	1.4	Neural Network (Specific Model)	11	0.895	10798	315.887	1727566	0.48	1634	None	219	1727566	0	7888.43	10798	3711	34712	2032	47.98
BSTS9.bin.19	82.31	1.55	Neural Network (Specific Model)	11	0.893	9385	289.155	2123507	0.49	2188	None	288	2123507	0	7373.29	9385	3669	31380	2007	48.78
BSTS9.bin.23	71.47	2.82	Neural Network (Specific Model)	11	0.921	11651	338.273	1942965	0.5	1765	None	210	1942965	0	9252.21	11651	4311	61375	2055	50.24
BSTS9.bin.3	60.7	0.21	Gradient Boost (General Model)	11	0.915	109039	326.105	740743	0.61	694	None	13	740743	0	56980.2	109039	31671	217027	3615	60.94
BSTS9.bin.33	59.19	0.93	Neural Network (Specific Model)	11	0.896	5158	305.805	1748278	0.43	1709	None	378	1748278	0	4625.07	5158	2542	17474	2005	43.2
BSTS9.bin.35	78.03	0.85	Neural Network (Specific Model)	11	0.898	24466	315.955	1564158	0.59	1484	None	98	1564158	0	15960.8	24466	6588	115702	2038	59.34
BSTS9.bin.40	74.43	1.77	Gradient Boost (General Model)	11	0.858	6765	292.535	2346542	0.49	2296	None	411	2346542	0	5709.35	6765	2997	25254	2033	49.09
BSTS9.bin.41	82.48	2.12	Gradient Boost (General Model)	11	0.907	21086	334.58	1840981	0.46	1666	None	124	1840981	0	14846.6	21086	6943	87309	2009	45.99
BSTS9.bin.44	64.92	0.71	Neural Network (Specific Model)	11	0.941	4340	278.857	1428259	0.57	1611	None	351	1428259	0	4069.11	4340	2422	20310	2000	57.02
BSTS9.bin.51	67.23	2.22	Neural Network (Specific Model)	11	0.908	8628	349.108	2561077	0.52	2223	None	394	2561077	0	6500.2	8628	3222	39324	2000	52.41
BSTS9.bin.56	67.55	0.14	Gradient Boost (General Model)	11	0.895	49266	361.671	1112174	0.47	918	None	37	1112174	0	30058.8	49266	14611	102151	2070	47.14
BSTS9.bin.57	80.16	0.41	Gradient Boost (General Model)	11	0.896	16455	331.752	1638798	0.43	1478	None	146	1638798	0	11224.6	16455	4934	135851	2050	43.1
BSTS9.bin.67	66.28	1.92	Neural Network (Specific Model)	11	0.902	4117	289.708	1501495	0.48	1561	None	386	1501495	0	3889.88	4117	2334	14737	2003	48.29
BSTS9.bin.68	81.21	1.51	Neural Network (Specific Model)	11	0.922	16888	337.95	2231837	0.49	2033	None	179	2231837	0	12468.4	16888	6284	60028	2053	49.35
BSTS9.bin.7	55.58	0.69	Neural Network (Specific Model)	11	0.926	5990	307.676	1267298	0.46	1274	None	250	1267298	0	5069.19	5990	2820	20607	2007	45.91
BSTS9.bin.75	58.44	0.07	Gradient Boost (General Model)	11	0.92	5085	288.438	1592634	0.48	1698	None	342	1592634	0	4656.82	5085	2502	18843	2003	48.02
BSTS9.bin.79	55.88	0.61	Gradient Boost (General Model)	11	0.901	4240	290.08	1335991	0.5	1386	None	330	1335991	0	4048.46	4240	2476	17893	2004	50.06
BSTS9.bin.82	83.55	0.86	Neural Network (Specific Model)	11	0.899	31163	360.84	3176726	0.51	2642	None	156	3176726	0	20363.6	31163	10436	102702	2011	51.39
BSTS9.bin.84	82.46	2.16	Neural Network (Specific Model)	11	0.92	11486	345	1961242	0.54	1745	None	221	1961242	0	8874.4	11486	4335	54865	2011	54.5
BSTS9.bin.86	77.66	0.53	Neural Network (Specific Model)	11	0.916	7789	323.948	2002151	0.46	1889	None	319	2002151	0	6276.34	7789	3130	34525	2023	46.46
BSTS9.bin.87	99.21	1.68	Gradient Boost (General Model)	11	0.878	113904	312.094	2627875	0.5	2468	None	48	2627875	0	54747.4	113904	23371	444182	2215	49.76
BSTS9.bin.97	69.84	2.77	Gradient Boost (General Model)	11	0.897	6372	300.624	1723954	0.46	1717	None	317	1723954	0	5438.34	6372	2944	22548	2018	45.69
BSTS9.bin.98	86.79	1.37	Neural Network (Specific Model)	11	0.895	9106	308.11	1748227	0.57	1695	None	250	1748227	0	6992.91	9106	3429	35777	2009	56.77
BV1.bin.105	59.28	0.4	Neural Network (Specific Model)	11	0.888	4663	309.533	1248858	0.47	1196	None	289	1248858	0	4321.31	4663	2467	15079	2008	46.67
BV1.bin.109	99.97	0.24	Neural Network (Specific Model)	11	0.938	110117	362.822	2179634	0.5	1884	None	39	2179634	0	55888.1	110117	24421	198725	4480	50.24
BV1.bin.110	73.61	3.53	Neural Network (Specific Model)	11	0.925	7753	337.169	1730559	0.54	1585	None	254	1730559	0	6813.22	7753	3669	35096	2017	54.46
BV1.bin.111	65.92	0	Neural Network (Specific Model)	11	0.9	10794	314.531	1218322	0.58	1163	None	161	1218322	0	7567.22	10794	3431	51513	2038	57.57
BV1.bin.115	90.65	1.11	Gradient Boost (General Model)	11	0.91	16193	361.651	2569907	0.51	2158	None	217	2569907	0	11842.9	16193	5614	60187	2048	51.13
BV1.bin.116	82.8	4.98	Neural Network (Specific Model)	11	0.914	11271	340.518	2280911	0.52	2044	None	285	2280911	0	8003.2	11271	3367	52174	2014	51.63
BV1.bin.118	89.14	4.62	Gradient Boost (General Model)	11	0.889	84957	329.757	2429439	0.45	2185	None	34	2429439	0	71454.1	84957	42192	207870	2608	44.89
BV1.bin.12	71.65	0.11	Gradient Boost (General Model)	11	0.876	48356	331.297	1371290	0.56	1210	None	40	1371290	0	34282.2	48356	18651	123498	2157	56.07
BV1.bin.123	80.49	0.61	Neural Network (Specific Model)	11	0.911	18099	328.434	1871745	0.45	1734	None	136	1871745	0	13762.8	18099	7242	68876	2019	45.24
BV1.bin.125	64.14	2.23	Neural Network (Specific Model)	11	0.911	5021	301.704	1674214	0.46	1688	None	371	1674214	0	4512.71	5021	2553	18351	2004	45.81
BV1.bin.130	97.27	0.57	Gradient Boost (General Model)	11	0.903	35526	333.864	3284876	0.51	2967	None	136	3284876	0	24153.5	35526	13079	112539	2088	51.36
BV1.bin.131	83.37	3.44	Gradient Boost (General Model)	11	0.923	9521	312.731	1536903	0.52	1514	None	225	1536903	0	6830.68	9521	3152	31393	2004	52.49
BV1.bin.132	68.58	1.08	Gradient Boost (General Model)	11	0.921	10813	312.626	1506481	0.5	1483	None	185	1506481	0	8143.14	10813	3828	48459	2019	50
BV1.bin.14	69.42	1.88	Neural Network (Specific Model)	11	0.928	6530	314.271	1745354	0.48	1721	None	324	1745354	0	5386.9	6530	2791	19865	2013	48
BV1.bin.149	88.59	0.01	Neural Network (Specific Model)	11	0.896	74601	378.668	2513765	0.53	1984	None	42	2513765	0	59851.6	74601	29225	214987	6834	53
BV1.bin.152	89.19	1.03	Gradient Boost (General Model)	11	0.895	70089	314.309	2849877	0.57	2708	None	156	2849877	0	18268.4	70089	7322	239025	2004	56.68
BV1.bin.155	90.92	2.13	Gradient Boost (General Model)	11	0.879	25200	300.097	2142902	0.53	2095	None	126	2142902	0	17007.2	25200	8851	76280	2015	52.53
BV1.bin.157	83.21	0	Neural Network (Specific Model)	11	0.897	41412	353.462	2370684	0.5	2010	None	86	2370684	0	27566.1	41412	14275	117375	3070	50.27
BV1.bin.18	60.95	1.58	Neural Network (Specific Model)	11	0.885	36514	376.524	1618302	0.57	1269	None	55	1618302	0	29423.7	36514	15880	129547	4490	57.05
BV1.bin.22	75.68	0.76	Neural Network (Specific Model)	11	0.891	11977	331.741	1805175	0.49	1619	None	208	1805175	0	8678.73	11977	3910	38410	2066	48.84
BV1.bin.29	89.66	0.83	Neural Network (Specific Model)	11	0.898	71702	366.803	2316674	0.57	1893	None	45	2316674	0	51481.6	71702	27018	143595	3667	56.59
BV1.bin.30	90.95	0.2	Neural Network (Specific Model)	11	0.913	41920	375.009	2022175	0.59	1642	None	72	2022175	0	28085.8	41920	15672	106690	2182	59.43
BV1.bin.31	91.04	0.51	Gradient Boost (General Model)	11	0.889	7377	283.33	1241352	0.45	1300	None	207	1241352	0	5996.87	7377	2934	25373	2042	45.14
BV1.bin.34	87.27	0.21	Neural Network (Specific Model)	11	0.917	33717	360.146	2476343	0.51	2104	None	109	2476343	0	22718.7	33717	10995	75600	2335	50.69
BV1.bin.36	78.64	1.29	Gradient Boost (General Model)	11	0.889	6598	275.229	2232994	0.46	2408	None	411	2232994	0	5433.08	6598	2678	24615	2001	45.76
BV1.bin.37	66.24	2.02	Neural Network (Specific Model)	11	0.921	5782	299.807	1370757	0.62	1405	None	269	1370757	0	5095.75	5782	2603	39421	2004	61.55
BV1.bin.38	89.35	3.06	Gradient Boost (General Model)	11	0.873	8424	282.176	1807839	0.54	1867	None	273	1807839	0	6622.12	8424	3162	39807	2008	53.85
BV1.bin.43	89.73	4.36	Neural Network (Specific Model)	11	0.901	13779	326.708	2100131	0.5	1933	None	221	2100131	0	9502.86	13779	4126	60861	2008	50.24
BV1.bin.44	76.56	0.88	Neural Network (Specific Model)	11	0.917	19349	357.741	1695248	0.53	1451	None	128	1695248	0	13244.1	19349	6158	69968	2098	52.89
BV1.bin.45	70.19	0.03	Neural Network (Specific Model)	11	0.927	28256	351.046	1465268	0.48	1292	None	81	1465268	0	18089.7	28256	8006	76230	2080	48.23
BV1.bin.5	97.85	1.53	Neural Network (Specific Model)	11	0.874	37707	302.181	2555782	0.52	2469	None	111	2555782	0	23025.1	37707	11006	108429	2067	51.7
BV1.bin.51	81.81	3.54	Neural Network (Specific Model)	11	0.901	10661	296.866	2275423	0.53	2305	None	295	2275423	0	7713.3	10661	3565	35460	2031	52.86
BV1.bin.60	82.01	1.85	Neural Network (Specific Model)	11	0.92	17381	322.38	2550726	0.5	2429	None	202	2550726	0	12627.4	17381	6136	79502	2081	49.75
BV1.bin.61	95.75	0.6	Gradient Boost (General Model)	11	0.901	61893	328.981	3265665	0.5	2986	None	71	3265665	0	45995.3	61893	32528	160608	2529	50.21
BV1.bin.63	95.63	0.5	Gradient Boost (General Model)	11	0.926	20192	334.432	2104525	0.52	1945	None	139	2104525	0	15140.5	20192	8351	76244	2005	52.46
BV1.bin.68	50.88	0.09	Neural Network (Specific Model)	11	0.93	22525	366.144	1336007	0.48	1133	None	78	1336007	0	17128.3	22525	8987	61217	2681	48.39
BV1.bin.71	86.4	1.56	Gradient Boost (General Model)	11	0.902	5582	284.448	2301563	0.49	2439	None	488	2301563	0	4716.32	5582	2513	23329	2004	48.69
BV1.bin.73	61.03	2.05	Neural Network (Specific Model)	11	0.884	37709	325.16	1567842	0.49	1423	None	56	1567842	0	27997.2	37709	15451	107875	2240	48.96
BV1.bin.8	80.39	3.11	Neural Network (Specific Model)	11	0.913	11208	334.826	2361214	0.46	2150	None	291	2361214	0	8114.14	11208	3622	43044	2008	45.83
BV1.bin.80	85.69	0.33	Neural Network (Specific Model)	11	0.908	46370	378.843	2203326	0.52	1763	None	71	2203326	0	31032.8	46370	14104	140051	2496	52.1
BV1.bin.83	98.1	4.73	Gradient Boost (General Model)	11	0.896	27871	295.413	2493822	0.48	2524	None	154	2493822	0	16193.6	27871	7087	71710	2015	48.1
BV1.bin.91	67.18	1.46	Gradient Boost (General Model)	11	0.877	9707	286.571	2007434	0.43	2052	None	288	2007434	0	6970.26	9707	2988	106015	2004	42.65
BV1.bin.99	80.03	3.27	Neural Network (Specific Model)	11	0.905	91569	333.182	1740333	0.6	1577	None	46	1740333	0	37833.3	91569	22541	277953	2110	59.89
BV10.bin.102	100	3.2	Gradient Boost (General Model)	11	0.883	56725	294.183	2537428	0.5	2542	None	82	2537428	0	30944.2	56725	14501	206136	2088	49.58
BV10.bin.11	71.81	2	Gradient Boost (General Model)	11	0.899	20648	331.267	1809971	0.46	1639	None	131	1809971	0	13816.6	20648	6580	73155	2041	45.71
BV10.bin.19	80.56	0.15	Neural Network (Specific Model)	11	0.929	17890	343.178	1592995	0.48	1441	None	142	1592995	0	11218.3	17890	4781	65636	2003	48.08
BV10.bin.22	74.24	1.86	Neural Network (Specific Model)	11	0.934	6434	297.057	1460920	0.46	1533	None	259	1460920	0	5640.62	6434	2894	31487	2010	45.89
BV10.bin.28	77.61	1.65	Gradient Boost (General Model)	11	0.909	17274	310.78	1864329	0.4	1821	None	161	1864329	0	11579.7	17274	5419	55426	2032	39.54
BV10.bin.30	68.39	3.1	Neural Network (Specific Model)	11	0.895	6153	328.534	1621334	0.61	1474	None	319	1621334	0	5082.55	6153	2649	20053	2009	61.25
BV10.bin.43	73.42	2.99	Gradient Boost (General Model)	11	0.884	5399	277.426	1843215	0.55	1961	None	389	1843215	0	4738.34	5399	2559	24318	2019	54.52
BV10.bin.51	67.28	0.99	Gradient Boost (General Model)	11	0.919	7429	304.824	1635645	0.5	1647	None	265	1635645	0	6172.25	7429	3209	40529	2006	49.62
BV10.bin.55	69.64	0.5	Neural Network (Specific Model)	11	0.854	5746	286.616	1748354	0.54	1740	None	346	1748354	0	5053.05	5746	2690	20463	2001	54.01
BV10.bin.56	83.52	4.26	Neural Network (Specific Model)	11	0.91	7110	316.512	2462427	0.46	2362	None	399	2462427	0	6171.5	7110	3070	28768	2017	45.93
BV10.bin.57	66.31	0.57	Neural Network (Specific Model)	11	0.89	7952	317.225	1500831	0.45	1406	None	251	1500831	0	5979.41	7952	2743	42988	2019	45.4
BV10.bin.63	74.89	1.82	Gradient Boost (General Model)	11	0.929	7710	297.202	1367322	0.57	1428	None	224	1367322	0	6104.12	7710	2887	35414	2028	57.39
BV10.bin.66	91.34	0.07	Neural Network (Specific Model)	11	0.929	28552	379.42	2184753	0.55	1785	None	110	2184753	0	19861.4	28552	10125	77681	2524	55
BV10.bin.76	78.72	0.52	Neural Network (Specific Model)	11	0.913	10009	348.147	2040841	0.51	1785	None	265	2040841	0	7701.29	10009	3507	35862	2003	51.34
BV10.bin.79	58.7	1.36	Gradient Boost (General Model)	11	0.918	15234	362.98	1758249	0.47	1484	None	178	1758249	0	9877.8	15234	4079	62172	2012	47.27
BV10.bin.8	86.62	0.81	Neural Network (Specific Model)	11	0.893	9405	310.792	1717458	0.57	1647	None	224	1717458	0	7667.22	9405	3768	52108	2005	56.83
BV10.bin.82	84.14	2.11	Neural Network (Specific Model)	11	0.908	10280	319.1	1888665	0.51	1794	None	247	1888665	0	7646.42	10280	3548	36493	2020	50.6
BV10.bin.83	96.37	1.35	Neural Network (Specific Model)	11	0.914	20722	365.157	2438835	0.56	2037	None	166	2438835	0	14691.8	20722	7017	60191	2075	56.43
BV12.bin.101	79.61	0.69	Neural Network (Specific Model)	11	0.902	83885	361.14	2194483	0.44	1830	None	45	2194483	0	48766.3	83885	28033	175149	2081	44.36
BV12.bin.105	85.07	3.79	Neural Network (Specific Model)	11	0.904	24927	327.79	2347923	0.48	2162	None	150	2347923	0	15652.8	24927	7595	78327	2010	48.26
BV12.bin.108	84.11	0.89	Neural Network (Specific Model)	11	0.909	31345	339.066	1818155	0.54	1627	None	87	1818155	0	20898.3	31345	9381	72252	2304	54.16
BV12.bin.11	80.42	3.58	Neural Network (Specific Model)	11	0.887	15329	314.686	1690114	0.47	1590	None	184	1690114	0	9185.4	15329	3657	41112	2000	46.8
BV12.bin.111	60.4	0.59	Neural Network (Specific Model)	11	0.921	6899	277.765	1093745	0.41	1212	None	186	1093745	0	5880.35	6899	2770	29796	2000	41.49
BV12.bin.112	60.62	1.21	Neural Network (Specific Model)	11	0.886	30377	351.363	1513075	0.47	1273	None	65	1513075	0	23278.1	30377	12340	136200	2083	47.27
BV12.bin.116	98.4	2.07	Gradient Boost (General Model)	11	0.895	110831	316.839	3302205	0.42	3115	None	59	3302205	0	55969.6	110831	30870	192029	2215	42.45
BV12.bin.12	89.64	0.19	Neural Network (Specific Model)	11	0.924	33441	364.078	2283040	0.51	1934	None	99	2283040	0	23061	33441	12429	115593	2038	50.83
BV12.bin.121	87.22	0.83	Neural Network (Specific Model)	11	0.92	41328	359.234	2681913	0.47	2293	None	97	2681913	0	27648.6	41328	13233	157241	2356	47.49
BV12.bin.126	86.43	0	Neural Network (Specific Model)	11	0.903	42441	364.12	2239579	0.53	1853	None	77	2239579	0	29085.4	42441	14854	94053	2562	53.23
BV12.bin.129	75.7	0	Neural Network (Specific Model)	11	0.907	8134	340.363	1873510	0.51	1667	None	295	1873510	0	6350.88	8134	3191	28334	2010	51.24
BV12.bin.134	82.94	3.95	Gradient Boost (General Model)	11	0.909	8949	309.616	2842961	0.52	2788	None	421	2842961	0	6752.88	8949	3232	40758	2003	51.76
BV12.bin.136	74.24	1.45	Gradient Boost (General Model)	11	0.912	6376	314.73	1280915	0.48	1239	None	241	1280915	0	5315	6376	2798	22346	2004	47.58
BV12.bin.15	65.56	1.43	Neural Network (Specific Model)	11	0.94	7015	333.968	1849783	0.56	1738	None	316	1849783	0	5853.74	7015	3076	28870	2029	56.02
BV12.bin.18	90.36	2.47	Neural Network (Specific Model)	11	0.891	21815	309.662	4162841	0.57	3998	None	267	4162841	0	15591.2	21815	7569	85457	2003	56.81
BV12.bin.20	98.17	0.11	Gradient Boost (General Model)	11	0.907	36861	336.915	3020132	0.47	2717	None	147	3020132	0	20545.1	36861	9745	89462	2271	47.38
BV12.bin.25	79.22	0.04	Neural Network (Specific Model)	11	0.911	36609	331.425	2195135	0.48	2016	None	99	2195135	0	22173.1	36609	12758	110647	2001	48.43
BV12.bin.3	99.98	0.1	Neural Network (Specific Model)	11	0.919	83746	389.866	2972958	0.53	2338	None	55	2972958	0	54053.8	83746	24476	248462	2864	53.14
BV12.bin.35	78.23	2.69	Neural Network (Specific Model)	11	0.945	7479	334.409	1361914	0.54	1285	None	215	1361914	0	6334.48	7479	3404	35837	2054	54.15
BV12.bin.37	83.62	3.05	Gradient Boost (General Model)	11	0.895	5888	283.333	2384791	0.53	2516	None	471	2384791	0	5063.25	5888	2743	23665	2015	52.81
BV12.bin.39	51.21	0.05	Neural Network (Specific Model)	11	0.909	22113	371.271	1300242	0.52	1062	None	77	1300242	0	16886.3	22113	9676	66406	2202	51.58
BV12.bin.41	75.05	2.71	Gradient Boost (General Model)	11	0.912	11054	318.685	2470088	0.52	2359	None	311	2470088	0	7942.41	11054	3668	42162	2012	52.31
BV12.bin.42	79.66	3.56	Neural Network (Specific Model)	11	0.91	14056	333.298	2167735	0.47	1976	None	224	2167735	0	9677.39	14056	4778	45207	2007	46.52
BV12.bin.47	86.07	1.22	Neural Network (Specific Model)	11	0.917	8557	334.905	1978523	0.56	1808	None	282	1978523	0	7016.04	8557	3671	29819	2052	56.16
BV12.bin.48	94.01	0.37	Neural Network (Specific Model)	11	0.91	47400	341.156	2817997	0.47	2510	None	103	2817997	0	27359.2	47400	13377	143489	2285	47.14
BV12.bin.49	77.33	4.81	Gradient Boost (General Model)	11	0.875	16134	294.882	2464872	0.6	2441	None	256	2464872	0	9628.41	16134	3650	53882	2013	60.4
BV12.bin.56	91.99	1.07	Gradient Boost (General Model)	11	0.91	26549	321.153	2383212	0.39	2254	None	120	2383212	0	19860.1	26549	10580	84477	2177	39.26
BV12.bin.59	87.83	0.56	Gradient Boost (General Model)	11	0.94	10716	348.397	1578487	0.58	1422	None	191	1578487	0	8264.33	10716	3951	41894	2037	58.25
BV12.bin.63	75.6	2	Neural Network (Specific Model)	11	0.932	5102	295.722	1501477	0.58	1580	None	326	1501477	0	4605.76	5102	2702	15174	2005	57.81
BV12.bin.65	81.54	0	Gradient Boost (General Model)	11	0.868	7004	308.597	1619945	0.57	1521	None	298	1619945	0	5436.06	7004	2820	21566	2009	56.61
BV12.bin.70	63.15	1.33	Neural Network (Specific Model)	11	0.868	6333	283.674	1603310	0.48	1638	None	297	1603310	0	5398.35	6333	2738	23031	2017	48.27
BV12.bin.71	64.34	1.58	Neural Network (Specific Model)	11	0.923	28803	350.256	1773922	0.47	1560	None	110	1773922	0	16126.6	28803	6621	194141	2176	47.24
BV12.bin.72	76.33	3.96	Gradient Boost (General Model)	11	0.925	6001	328.924	1982480	0.54	1862	None	391	1982480	0	5070.28	6001	2713	22995	2008	53.66
BV12.bin.77	93.53	0.02	Neural Network (Specific Model)	11	0.909	56490	364.579	2587711	0.53	2155	None	61	2587711	0	42421.5	56490	23356	192986	3022	52.72
BV12.bin.8	64.1	1.7	Neural Network (Specific Model)	11	0.898	8916	328.078	1831290	0.45	1673	None	270	1831290	0	6782.56	8916	3114	45417	2037	44.91
BV12.bin.86	65.81	3.15	Gradient Boost (General Model)	11	0.909	5570	325.86	1600299	0.53	1491	None	331	1600299	0	4834.74	5570	2686	21414	2001	52.51
BV12.bin.90	66.47	2.63	Neural Network (Specific Model)	11	0.919	4901	310.673	1724628	0.47	1702	None	378	1724628	0	4562.51	4901	2645	19887	2016	46.56
BV12.bin.95	64.33	0.24	Neural Network (Specific Model)	11	0.901	80980	362.094	1608505	0.52	1336	None	27	1608505	0	59574.3	80980	28573	160759	6585	51.87
BV13.bin.102	83.85	0.3	Neural Network (Specific Model)	11	0.876	11868	293.9	2372154	0.44	2360	None	296	2372154	0	8014.03	11868	3585	36568	2015	44.45
BV13.bin.103	60.62	0.63	Neural Network (Specific Model)	11	0.916	29926	355.439	1509121	0.5	1298	None	75	1509121	0	20121.6	29926	9353	102806	2918	49.89
BV13.bin.104	92.01	0.11	Neural Network (Specific Model)	11	0.894	80040	370.725	2895763	0.49	2330	None	65	2895763	0	44550.2	80040	26469	190645	2136	48.7
BV13.bin.16	99.85	2.1	Gradient Boost (General Model)	11	0.879	49247	302.016	2257670	0.52	2194	None	73	2257670	0	30927	49247	14841	185542	2317	52.29
BV13.bin.17	99.66	3.24	Neural Network (Specific Model)	11	0.911	45644	361.087	2302842	0.54	1940	None	79	2302842	0	29149.9	45644	12615	131503	2956	53.82
BV13.bin.19	72.82	1.41	Neural Network (Specific Model)	11	0.926	7317	311.542	1550902	0.44	1538	None	258	1550902	0	6011.25	7317	2854	40957	2003	44.35
BV13.bin.2	52.16	0.1	Neural Network (Specific Model)	11	0.909	19168	355.318	1731204	0.48	1479	None	136	1731204	0	12729.4	19168	5795	75747	2004	47.79
BV13.bin.22	80.9	0.23	Neural Network (Specific Model)	11	0.889	30895	339.096	2006819	0.47	1756	None	92	2006819	0	21813.2	30895	11714	81369	2434	47.35
BV13.bin.24	98.06	2.26	Gradient Boost (General Model)	11	0.902	101564	339.929	3738673	0.51	3310	None	55	3738673	0	67975.9	101564	35680	224867	2270	50.6
BV13.bin.26	61.4	2.16	Gradient Boost (General Model)	11	0.928	35815	379.473	1383735	0.5	1130	None	64	1383735	0	21620.9	35815	9154	135286	2167	49.91
BV13.bin.32	96.25	1.58	Gradient Boost (General Model)	11	0.881	60977	332.069	4153325	0.5	3678	None	125	4153325	0	33226.6	60977	19659	200720	2158	49.93
BV13.bin.33	85.18	4.2	Gradient Boost (General Model)	11	0.921	11961	318.211	2363346	0.51	2285	None	280	2363346	0	8440.52	11961	3872	47000	2018	50.7
BV13.bin.34	84.08	1.09	Gradient Boost (General Model)	11	0.899	8410	304.542	2015309	0.55	1986	None	297	2015309	0	6785.55	8410	3522	31340	2042	54.56
BV13.bin.38	78.19	1.35	Gradient Boost (General Model)	11	0.941	6667	337.151	1488820	0.58	1388	None	268	1488820	0	5555.3	6667	2920	18100	2028	58.37
BV13.bin.46	83.09	4.6	Gradient Boost (General Model)	11	0.917	6268	313.464	1909551	0.47	1865	None	356	1909551	0	5363.91	6268	2724	21467	2000	46.59
BV13.bin.52	83.97	1.51	Gradient Boost (General Model)	11	0.911	11287	335.092	2153036	0.56	1955	None	243	2153036	0	8860.23	11287	4476	49544	2005	56.27
BV13.bin.53	81.93	0.3	Neural Network (Specific Model)	11	0.901	6265	304.403	1809264	0.49	1788	None	336	1809264	0	5384.71	6265	2877	29026	2001	48.68
BV13.bin.55	91.23	1.36	Neural Network (Specific Model)	11	0.924	47334	342.834	2273716	0.48	2047	None	103	2273716	0	22074.9	47334	10751	121758	2066	48.05
BV13.bin.57	83.3	3.38	Neural Network (Specific Model)	11	0.907	35451	355.495	2545650	0.54	2169	None	95	2545650	0	26796.3	35451	13763	113162	2192	54.04
BV13.bin.59	92.95	0.51	Neural Network (Specific Model)	11	0.879	32069	314.437	2290410	0.48	2137	None	91	2290410	0	25169.3	32069	13376	164726	2137	47.81
BV13.bin.61	75.23	0.97	Neural Network (Specific Model)	11	0.896	6270	303.795	1700534	0.56	1674	None	311	1700534	0	5467.96	6270	2844	23165	2000	55.56
BV13.bin.65	66.77	1.16	Gradient Boost (General Model)	11	0.919	4573	278.613	1197357	0.59	1319	None	290	1197357	0	4128.82	4573	2405	18392	2002	58.53
BV13.bin.66	82.32	0.35	Gradient Boost (General Model)	11	0.911	6729	282.348	1650756	0.48	1780	None	292	1650756	0	5653.27	6729	2958	25957	2002	47.69
BV13.bin.68	72.84	0.1	Neural Network (Specific Model)	11	0.907	59204	362.433	1706104	0.5	1425	None	38	1706104	0	44897.5	59204	26083	169294	3132	50.25
BV13.bin.69	96.98	0.48	Gradient Boost (General Model)	11	0.875	50996	306.686	2434408	0.53	2320	None	92	2434408	0	26461	50996	11837	143421	2010	52.7
BV13.bin.7	69.93	2.83	Gradient Boost (General Model)	11	0.879	11871	292.327	2349734	0.63	2359	None	277	2349734	0	8482.79	11871	3883	85733	2010	63.45
BV13.bin.70	78.06	1.61	Neural Network (Specific Model)	11	0.928	7233	324.368	1541610	0.55	1473	None	254	1541610	0	6069.33	7233	3294	24092	2012	55.45
BV13.bin.71	85.31	0.75	Neural Network (Specific Model)	11	0.927	70027	374.987	2224578	0.58	1835	None	41	2224578	0	54258	70027	25701	245275	3965	58.09
BV13.bin.73	94.34	0.99	Neural Network (Specific Model)	11	0.928	17206	360.533	2283480	0.56	1961	None	165	2283480	0	13839.3	17206	7699	65662	2113	56.06
BV13.bin.74	95.39	2.4	Gradient Boost (General Model)	11	0.89	14041	308.951	1794001	0.56	1725	None	179	1794001	0	10022.4	14041	4590	55428	2033	56.47
BV13.bin.79	77.87	1.65	Neural Network (Specific Model)	11	0.892	21266	375.576	1932311	0.57	1532	None	125	1932311	0	15458.5	21266	8449	57710	2063	57.06
BV13.bin.80	58.14	0.29	Neural Network (Specific Model)	11	0.918	6753	305.652	2621154	0.57	2629	None	472	2621154	0	5553.29	6753	2581	35202	2001	56.86
BV13.bin.88	98.81	0.84	Neural Network (Specific Model)	11	0.894	83329	334.121	2622708	0.45	2344	None	47	2622708	0	55802.3	83329	27325	178345	3501	44.82
BV13.bin.9	64.92	1.92	Neural Network (Specific Model)	11	0.89	20936	369.505	1657111	0.48	1333	None	115	1657111	0	14409.7	20936	6288	68909	2103	47.91
BV13.bin.91	55.98	0.29	Neural Network (Specific Model)	11	0.914	5699	314.906	1035310	0.49	1003	None	198	1035310	0	5228.84	5699	2625	38528	2014	48.63
BV13.bin.92	69.65	1.26	Neural Network (Specific Model)	11	0.86	29973	303.927	2005405	0.58	1894	None	110	2005405	0	18231	29973	7488	96246	2017	57.79
BV13.bin.94	86.95	1.62	Gradient Boost (General Model)	11	0.888	66806	332.597	2287799	0.45	2038	None	48	2287799	0	47662.5	66806	25301	170476	3250	44.98
BV13.bin.96	55.65	0.89	Neural Network (Specific Model)	11	0.909	7388	324.543	1322278	0.49	1236	None	225	1322278	0	5876.79	7388	2920	30906	2005	48.79
BV14.H.bin.1	65.96	0.64	Neural Network (Specific Model)	11	0.926	6854	311.363	1717947	0.44	1707	None	310	1717947	0	5541.76	6854	2799	20720	2003	44.36
BV14.H.bin.104	99.5	0.48	Neural Network (Specific Model)	11	0.857	61046	301.809	2743254	0.5	2603	None	107	2743254	0	25637.9	61046	12309	241439	2033	50.23
BV14.H.bin.108	97.33	1.01	Neural Network (Specific Model)	11	0.918	53732	372.06	2574193	0.46	2120	None	87	2574193	0	29588.4	53732	16502	175223	2087	46
BV14.H.bin.111	76.21	4.62	Gradient Boost (General Model)	11	0.869	4744	275.544	2162182	0.52	2278	None	509	2162182	0	4247.9	4744	2446	19717	2003	52.03
BV14.H.bin.118	88.71	1.87	Neural Network (Specific Model)	11	0.871	38326	319.56	2361609	0.47	2149	None	101	2361609	0	23382.3	38326	11217	116040	2057	47.33
BV14.H.bin.119	76.79	3.48	Gradient Boost (General Model)	11	0.874	5754	284.732	2099130	0.54	2151	None	412	2099130	0	5094.98	5754	2655	27657	2000	53.77
BV14.H.bin.120	90.5	4.75	Neural Network (Specific Model)	11	0.92	13212	340.204	2078821	0.53	1876	None	213	2078821	0	9759.72	13212	4735	40162	2221	53.32
BV14.H.bin.19	97.62	2.98	Gradient Boost (General Model)	11	0.895	84767	324.631	3487385	0.5	3211	None	66	3487385	0	52839.2	84767	30441	294395	2344	49.64
BV14.H.bin.2	93.19	2.16	Gradient Boost (General Model)	11	0.88	18516	341.795	1524977	0.61	1310	None	110	1524977	0	13863.4	18516	7048	93830	2042	60.79
BV14.H.bin.25	98.39	0.27	Neural Network (Specific Model)	11	0.913	83894	365.654	2714458	0.55	2263	None	51	2714458	0	53224.7	83894	29787	291471	4114	54.93
BV14.H.bin.29	92.73	1.8	Gradient Boost (General Model)	11	0.921	36367	331.239	1554098	0.6	1442	None	82	1554098	0	18952.4	36367	8528	101471	2049	59.53
BV14.H.bin.32	79.39	2.18	Gradient Boost (General Model)	11	0.874	16870	292.638	1865542	0.53	1860	None	167	1865542	0	11170.9	16870	5553	72769	2031	52.86
BV14.H.bin.34	96.89	2.3	Gradient Boost (General Model)	11	0.896	12647	299.621	1610170	0.59	1608	None	176	1610170	0	9148.69	12647	4476	67835	2071	59.48
BV14.H.bin.36	87.4	1.66	Neural Network (Specific Model)	11	0.915	65699	345.439	3441434	0.49	3045	None	85	3441434	0	40487.5	65699	22333	142789	2556	48.76
BV14.H.bin.37	96.1	1.24	Gradient Boost (General Model)	11	0.871	136283	325.703	4623314	0.49	4128	None	54	4623314	0	85616.9	136283	45117	362822	2972	49.09
BV14.H.bin.38	78.78	2.93	Gradient Boost (General Model)	11	0.886	7538	284.899	1932623	0.66	2008	None	323	1932623	0	5983.35	7538	2936	34238	2005	66.18
BV14.H.bin.40	94.02	4.76	Gradient Boost (General Model)	11	0.875	18999	301.451	2621747	0.53	2541	None	188	2621747	0	13945.5	18999	6395	95544	2233	52.86
BV14.H.bin.45	81.05	1.46	Gradient Boost (General Model)	11	0.9	5726	287.206	1983585	0.46	2077	None	412	1983585	0	4814.53	5726	2612	18302	2004	45.56
BV14.H.bin.48	71.59	3.62	Neural Network (Specific Model)	11	0.918	5877	310.519	2001007	0.46	1974	None	396	2001007	0	5053.05	5877	2697	29891	2001	46.26
BV14.H.bin.49	90.91	2.46	Gradient Boost (General Model)	11	0.916	21536	332.064	2730437	0.44	2515	None	189	2730437	0	14446.8	21536	7016	62969	2025	44.1
BV14.H.bin.50	82.09	0.51	Neural Network (Specific Model)	11	0.912	26049	342.37	2379262	0.55	2116	None	138	2379262	0	17241	26049	9101	52753	2408	54.5
BV14.H.bin.51	97.69	0.06	Gradient Boost (General Model)	11	0.905	122715	322.62	1839102	0.41	1722	None	29	1839102	0	63417.3	122715	27676	244460	2423	41.21
BV14.H.bin.52	70.52	1.86	Gradient Boost (General Model)	11	0.9	4382	283.671	1034691	0.57	1096	None	251	1034691	0	4122.27	4382	2411	12676	2006	56.97
BV14.H.bin.53	93.46	0.25	Neural Network (Specific Model)	11	0.91	40314	347.78	2063628	0.54	1803	None	64	2063628	0	32244.2	40314	15502	119066	5938	53.67
BV14.H.bin.54	50.83	0	Gradient Boost (General Model)	11	0.875	40555	338.777	876199	0.57	755	None	28	876199	0	31292.8	40555	19977	100850	2742	56.88
BV14.H.bin.56	76.85	2.06	Neural Network (Specific Model)	11	0.902	13329	334.986	2024693	0.45	1820	None	216	2024693	0	9373.58	13329	4315	44415	2000	44.57
BV14.H.bin.69	97.73	2.59	Gradient Boost (General Model)	11	0.9	138024	329.007	2937316	0.44	2682	None	31	2937316	0	94752.1	138024	48659	270562	4015	43.51
BV14.H.bin.70	81.9	0.9	Gradient Boost (General Model)	11	0.911	28835	349.016	2293171	0.44	1999	None	117	2293171	0	19599.8	28835	10423	97016	2050	44.44
BV14.H.bin.73	90.51	1.77	Neural Network (Specific Model)	11	0.921	68046	366.513	2663719	0.48	2236	None	72	2663719	0	36996.1	68046	19692	147362	2049	48.21
BV14.H.bin.74	77.45	1.91	Gradient Boost (General Model)	11	0.876	11860	294.843	2243831	0.54	2226	None	251	2243831	0	8939.57	11860	4552	35977	2027	54.03
BV14.H.bin.78	56.89	0.15	Neural Network (Specific Model)	11	0.888	39989	311.062	1037414	0.54	989	None	36	1037414	0	28817	39989	16262	116703	2573	54.29
BV14.H.bin.79	82.01	0.25	Gradient Boost (General Model)	11	0.89	362475	320.413	1811159	0.5	1680	None	8	1811159	0	226395	362475	122806	492492	46228	50.28
BV14.H.bin.81	93.51	0.36	Neural Network (Specific Model)	11	0.898	122597	350.71	3016806	0.49	2580	None	39	3016806	0	77354	122597	36983	332451	5634	48.52
BV14.H.bin.82	78.36	1.27	Gradient Boost (General Model)	11	0.91	9541	307.904	1723545	0.4	1701	None	231	1723545	0	7461.23	9541	3827	27503	2007	40.05
BV14.H.bin.85	83.9	0.02	Neural Network (Specific Model)	11	0.901	79825	323.732	2581165	0.43	2400	None	50	2581165	0	51623.3	79825	35374	175687	2043	43.31
BV14.H.bin.86	68.42	1.31	Neural Network (Specific Model)	11	0.918	5830	313.666	1459041	0.47	1425	None	286	1459041	0	5101.54	5830	2816	32835	2002	47.32
BV14.H.bin.88	97.04	0.32	Gradient Boost (General Model)	11	0.882	66281	322.338	1896285	0.49	1731	None	50	1896285	0	37925.7	66281	20575	372432	2254	49.22
BV14.H.bin.89	67.79	0.67	Gradient Boost (General Model)	11	0.865	4033	278.026	1494765	0.53	1553	None	377	1494765	0	3964.89	4033	2475	20500	2007	53.18
BV14.H.bin.95	92.72	0.34	Neural Network (Specific Model)	11	0.886	18089	337.3	2463980	0.49	2160	None	195	2463980	0	12635.8	18089	6091	57563	2125	48.58
BV16.bin.105	71.54	3.17	Gradient Boost (General Model)	11	0.92	6522	324.457	1596025	0.56	1511	None	289	1596025	0	5522.58	6522	2879	21049	2040	56.35
BV16.bin.106	92.54	1.99	Neural Network (Specific Model)	11	0.898	16334	308.354	2626210	0.45	2554	None	241	2626210	0	10897.1	16334	5090	87113	2041	44.98
BV16.bin.107	68.42	2.54	Neural Network (Specific Model)	11	0.922	10078	338.519	1702985	0.47	1549	None	221	1702985	0	7705.81	10078	3652	41019	2003	46.84
BV16.bin.111	84.99	0.01	Gradient Boost (General Model)	11	0.861	127109	315.19	2169067	0.54	1978	None	41	2169067	0	52904.1	127109	20960	375611	2102	54.06
BV16.bin.116	87.89	1.44	Neural Network (Specific Model)	11	0.908	41717	356.18	3164245	0.44	2693	None	125	3164245	0	25314	41717	12448	133211	2071	43.69
BV16.bin.117	92.3	4.71	Gradient Boost (General Model)	11	0.904	12323	327.744	2724961	0.49	2509	None	311	2724961	0	8761.93	12323	4126	64409	2005	49.14
BV16.bin.123	74.26	1.43	Gradient Boost (General Model)	11	0.897	5181	293.688	1290500	0.57	1316	None	278	1290500	0	4642.09	5181	2499	19238	2031	57.32
BV16.bin.124	83.91	4.42	Neural Network (Specific Model)	11	0.916	14698	340.672	1703631	0.55	1530	None	155	1703631	0	10991.2	14698	5448	37892	2226	55.17
BV16.bin.13	87.21	0.08	Gradient Boost (General Model)	11	0.899	84261	329.836	1557897	0.54	1417	None	30	1557897	0	51929.9	84261	24168	149813	8395	53.82
BV16.bin.21	70.28	0.33	Neural Network (Specific Model)	11	0.898	74400	362.812	1762223	0.47	1456	None	37	1762223	0	47627.7	74400	25946	199477	2055	46.57
BV16.bin.38	90.85	1.35	Neural Network (Specific Model)	11	0.896	46320	346.182	2296267	0.48	1984	None	86	2296267	0	26700.8	46320	13900	128449	2214	47.73
BV16.bin.40	57.92	0.58	Neural Network (Specific Model)	11	0.934	6677	319.882	1151276	0.56	1123	None	206	1151276	0	5588.72	6677	2930	22833	2006	55.65
BV16.bin.49	85.62	4.83	Gradient Boost (General Model)	11	0.869	12112	302.279	2340781	0.61	2247	None	246	2340781	0	9515.37	12112	4822	53977	2053	61.47
BV16.bin.5	79.74	0.76	Gradient Boost (General Model)	11	0.922	7956	336.479	1683046	0.53	1540	None	251	1683046	0	6705.36	7956	3476	32644	2046	52.66
BV16.bin.55	79.53	0.38	Gradient Boost (General Model)	11	0.929	4812	286.261	1353151	0.46	1467	None	307	1353151	0	4407.66	4812	2549	18078	2008	45.73
BV16.bin.62	92.77	1.28	Gradient Boost (General Model)	11	0.911	108130	332.755	2988755	0.47	2732	None	53	2988755	0	56391.6	108130	46634	225625	2147	47.33
BV16.bin.64	82.99	0.19	Neural Network (Specific Model)	11	0.92	36118	335.361	2281636	0.52	2089	None	86	2281636	0	26530.7	36118	13957	95593	2010	51.92
BV16.bin.67	82.12	3.36	Neural Network (Specific Model)	11	0.908	8820	313.151	2645350	0.5	2560	None	373	2645350	0	7092.09	8820	3578	30903	2008	49.72
BV16.bin.69	88.36	0.55	Gradient Boost (General Model)	11	0.874	31095	315.659	1943847	0.47	1796	None	109	1943847	0	17833.5	31095	7811	84262	2062	46.72
BV16.bin.78	73.12	3.75	Neural Network (Specific Model)	11	0.917	7554	350.616	1883362	0.52	1644	None	311	1883362	0	6055.83	7554	3131	21294	2010	51.71
BV16.bin.79	74.49	1.77	Neural Network (Specific Model)	11	0.932	7755	317.281	1483309	0.49	1455	None	240	1483309	0	6180.45	7755	2988	38402	2004	49.47
BV16.bin.82	83.37	0.93	Neural Network (Specific Model)	11	0.876	15800	303.008	2345924	0.54	2265	None	209	2345924	0	11224.5	15800	5241	67078	2003	54.31
BV16.bin.83	92.37	2.67	Gradient Boost (General Model)	11	0.889	16132	313.271	1926986	0.57	1827	None	175	1926986	0	11011.4	16132	5455	47161	2062	56.53
BV16.bin.87	51.7	0.17	Neural Network (Specific Model)	11	0.904	5551	314.412	1267341	0.5	1216	None	257	1267341	0	4931.29	5551	2662	17195	2032	49.66
BV16.bin.88	72.7	0.76	Neural Network (Specific Model)	11	0.911	15899	309.15	1797501	0.4	1767	None	164	1797501	0	10960.4	15899	5359	47767	2005	39.65
BV17.H.bin.12	82.6	0.76	Neural Network (Specific Model)	11	0.878	34428	333.667	2270013	0.54	1993	None	93	2270013	0	24408.7	34428	12197	78834	2096	53.88
BV17.H.bin.21	88.84	3.48	Gradient Boost (General Model)	11	0.91	13114	318.809	2239932	0.46	2135	None	250	2239932	0	8959.73	13114	4489	47555	2003	46.19
BV17.H.bin.22	87.09	0.06	Neural Network (Specific Model)	11	0.905	46653	355.929	2972451	0.42	2522	None	102	2972451	0	29141.7	46653	15768	161253	2088	42.3
BV17.H.bin.25	68.3	0.81	Neural Network (Specific Model)	11	0.912	8671	295.149	1617365	0.4	1668	None	249	1617365	0	6495.44	8671	3110	33709	2006	40
BV17.H.bin.26	94.85	1.96	Gradient Boost (General Model)	11	0.915	73653	334.77	2701602	0.5	2465	None	58	2701602	0	46579.3	73653	23493	206103	2384	49.72
BV17.H.bin.28	94.61	0.94	Gradient Boost (General Model)	11	0.892	27989	314.622	2939061	0.57	2782	None	165	2939061	0	17812.5	27989	8323	132223	2053	57.03
BV17.H.bin.29	91.56	0.45	Gradient Boost (General Model)	11	0.908	36097	328.658	2395157	0.49	2211	None	94	2395157	0	25480.4	36097	14567	111591	2090	48.96
BV17.H.bin.4	75.77	3.11	Neural Network (Specific Model)	11	0.919	70994	350.186	2318396	0.47	2031	None	83	2318396	0	27932.5	70994	14607	146467	2026	47.26
BV17.H.bin.43	84.69	2.51	Neural Network (Specific Model)	11	0.914	18800	337.456	2258767	0.48	2042	None	188	2258767	0	12014.7	18800	5873	80764	2026	48.22
BV17.H.bin.46	84.65	0.19	Neural Network (Specific Model)	11	0.92	22787	361.195	2323469	0.51	1975	None	142	2323469	0	16362.5	22787	8111	89067	2188	50.99
BV17.H.bin.49	79.01	4.61	Neural Network (Specific Model)	11	0.947	6557	325.865	1753642	0.56	1702	None	329	1753642	0	5330.22	6557	2744	24934	2026	55.51
BV17.H.bin.51	83.38	0.17	Gradient Boost (General Model)	11	0.94	9172	332.768	1477570	0.58	1393	None	216	1477570	0	6840.6	9172	3313	26467	2002	58.06
BV17.H.bin.52	94.69	0.62	Neural Network (Specific Model)	11	0.894	55322	304.709	2393532	0.48	2344	None	73	2393532	0	32788.1	55322	15459	193642	2041	48.49
BV17.H.bin.54	94.09	4.4	Gradient Boost (General Model)	11	0.888	72397	331.512	4613426	0.48	4127	None	123	4613426	0	37507.5	72397	20337	165362	2144	47.7
BV17.H.bin.57	74.09	3.23	Neural Network (Specific Model)	11	0.916	5878	278.966	1773789	0.6	1944	None	344	1773789	0	5156.36	5878	2655	40312	2004	59.85
BV17.H.bin.63	72.27	1.83	Neural Network (Specific Model)	11	0.928	6027	320.249	1830247	0.52	1771	None	354	1830247	0	5170.19	6027	2596	48322	2013	52.12
BV17.H.bin.67	79.32	1.15	Neural Network (Specific Model)	11	0.901	15007	332.323	1598761	0.46	1447	None	170	1598761	0	9404.48	15007	4070	33519	2106	46.27
BV17.H.bin.70	57.88	0.04	Neural Network (Specific Model)	11	0.89	105051	303.569	1169601	0.44	1145	None	23	1169601	0	50852.2	105051	25904	131180	3289	44.44
BV17.H.bin.72	96.1	0.05	Gradient Boost (General Model)	11	0.86	14771	295.371	2847896	0.45	2770	None	287	2847896	0	9922.98	14771	4296	58142	2016	44.55
BV17.H.bin.74	93.16	0.26	Neural Network (Specific Model)	11	0.908	40260	344.435	2207180	0.5	1942	None	83	2207180	0	26592.5	40260	12758	114390	2029	49.74
BV17.H.bin.77	85.74	0.17	Gradient Boost (General Model)	11	0.895	8767	314.311	1308185	0.58	1243	None	199	1308185	0	6573.79	8767	3020	45128	2003	57.51
BV17.H.bin.85	96.68	0.89	Gradient Boost (General Model)	11	0.888	33071	311.439	1969590	0.41	1874	None	115	1969590	0	17126.9	33071	7154	144087	2221	40.53
BV18.H.bin.10	91.86	2.01	Gradient Boost (General Model)	11	0.879	88243	332.094	3567985	0.5	3153	None	71	3567985	0	50253.3	88243	31061	147286	2348	49.82
BV18.H.bin.102	92.1	0.23	Neural Network (Specific Model)	11	0.904	57316	353.378	3356441	0.43	2866	None	79	3356441	0	42486.6	57316	24346	157643	2163	42.55
BV18.H.bin.104	53.73	0.41	Gradient Boost (General Model)	11	0.913	3799	283.724	1243927	0.46	1337	None	336	1243927	0	3702.16	3799	2288	15860	2003	46.48
BV18.H.bin.105	96.97	0.31	Gradient Boost (General Model)	11	0.895	18668	307.232	1802381	0.52	1753	None	141	1802381	0	12782.8	18668	5726	120248	2144	52
BV18.H.bin.108	87.93	0.1	Neural Network (Specific Model)	11	0.918	95289	371.188	1608704	0.51	1327	None	30	1608704	0	53623.5	95289	27172	214663	4229	51.48
BV18.H.bin.109	73.19	0.12	Neural Network (Specific Model)	11	0.893	152612	352.466	2248188	0.49	1902	None	19	2248188	0	118326	152612	59895	441552	9660	48.77
BV18.H.bin.110	88.49	2.11	Neural Network (Specific Model)	11	0.906	24326	332.917	1968451	0.46	1789	None	149	1968451	0	13211.1	24326	6206	95006	2004	46.36
BV18.H.bin.111	81.74	2.14	Gradient Boost (General Model)	11	0.881	12925	295.686	2913284	0.47	2899	None	319	2913284	0	9132.55	12925	4377	44086	2004	47.49
BV18.H.bin.112	76.35	2.32	Gradient Boost (General Model)	11	0.912	9054	333.065	2102823	0.56	1922	None	301	2102823	0	6986.12	9054	3471	34747	2013	55.94
BV18.H.bin.113	98.36	0.03	Gradient Boost (General Model)	11	0.909	50790	342.763	1785210	0.47	1581	None	52	1785210	0	34331	50790	16445	108751	2530	47.01
BV18.H.bin.114	82.43	0.05	Neural Network (Specific Model)	11	0.893	9394	327.612	2027067	0.44	1845	None	273	2027067	0	7425.15	9394	3682	30889	2075	43.72
BV18.H.bin.115	65.88	0.22	Gradient Boost (General Model)	11	0.871	21125	294.824	1493507	0.53	1473	None	105	1493507	0	14223.9	21125	6577	71037	2020	52.9
BV18.H.bin.117	64.54	0.47	Gradient Boost (General Model)	11	0.867	5651	297.023	1468472	0.56	1431	None	298	1468472	0	4927.76	5651	2763	16077	2006	56.02
BV18.H.bin.123	71.54	0.02	Neural Network (Specific Model)	11	0.92	24954	332.605	1540272	0.43	1422	None	91	1540272	0	16926.1	24954	11095	87826	2213	42.5
BV18.H.bin.124	79.63	1	Neural Network (Specific Model)	11	0.92	80206	342.838	2208280	0.46	1980	None	41	2208280	0	53860.5	80206	36185	248046	2098	46.1
BV18.H.bin.14	65	1.1	Gradient Boost (General Model)	11	0.917	5698	322.589	1350511	0.55	1282	None	273	1350511	0	4946.93	5698	2722	21288	2006	54.69
BV18.H.bin.16	92.86	1.36	Neural Network (Specific Model)	11	0.895	19926	317.035	2134200	0.47	2012	None	171	2134200	0	12480.7	19926	5708	61693	2163	46.91
BV18.H.bin.20	93.48	0.96	Gradient Boost (General Model)	11	0.905	44247	336.352	1636651	0.61	1470	None	68	1636651	0	24068.4	44247	12007	93481	3054	60.99
BV18.H.bin.26	96.31	0.5	Gradient Boost (General Model)	11	0.937	27901	370.458	1873811	0.52	1583	None	93	1873811	0	20148.5	27901	9950	79856	2139	52.44
BV18.H.bin.27	79.36	2.46	Neural Network (Specific Model)	11	0.928	23050	354.319	2272055	0.49	1986	None	161	2272055	0	14112.1	23050	6013	83739	2009	49.04
BV18.H.bin.29	86.12	1.48	Gradient Boost (General Model)	11	0.915	8074	310.482	1725577	0.46	1698	None	263	1725577	0	6561.13	8074	2989	58259	2008	45.59
BV18.H.bin.31	92.36	0.45	Gradient Boost (General Model)	11	0.884	33778	310.748	1977491	0.49	1877	None	97	1977491	0	20386.5	33778	10411	129986	2083	49.06
BV18.H.bin.38	100	0.15	Gradient Boost (General Model)	11	0.859	35962	304.839	3126938	0.44	2941	None	132	3126938	0	23688.9	35962	11528	137332	2264	43.91
BV18.H.bin.4	76.01	3.24	Gradient Boost (General Model)	11	0.925	6267	295.34	1388345	0.63	1452	None	270	1388345	0	5142.02	6267	2692	19426	2007	62.97
BV18.H.bin.42	71.99	0.7	Gradient Boost (General Model)	11	0.86	46040	320.978	2111967	0.6	1889	None	84	2111967	0	25142.5	46040	12709	191151	2016	60.16
BV18.H.bin.47	93.98	0.79	Gradient Boost (General Model)	11	0.881	70808	328.045	2624815	0.56	2352	None	66	2624815	0	39769.9	70808	20348	148175	2292	56.35
BV18.H.bin.48	89.58	3.43	Neural Network (Specific Model)	11	0.89	64902	333.444	2145786	0.47	1911	None	53	2145786	0	40486.5	64902	19112	252723	2707	47.37
BV18.H.bin.5	77.86	0.6	Neural Network (Specific Model)	11	0.886	7239	279.066	2042611	0.53	2164	None	344	2042611	0	5937.82	7239	2990	32168	2012	52.78
BV18.H.bin.59	81.4	3.22	Neural Network (Specific Model)	11	0.911	17070	329.57	2482836	0.52	2292	None	211	2482836	0	11767	17070	5583	84935	2020	52.31
BV18.H.bin.60	56.44	0.42	Gradient Boost (General Model)	11	0.946	4919	317.907	1018412	0.56	1012	None	235	1018412	0	4333.67	4919	2541	14376	2002	56.31
BV18.H.bin.69	97.96	3.85	Gradient Boost (General Model)	11	0.881	146522	303.813	2373691	0.49	2298	None	44	2373691	0	53947.5	146522	28341	250206	2226	49.5
BV18.H.bin.70	54.11	0.05	Neural Network (Specific Model)	11	0.92	3906	268.85	1333244	0.52	1526	None	355	1333244	0	3755.62	3906	2390	23286	2023	52
BV18.H.bin.72	57.68	0.49	Neural Network (Specific Model)	11	0.88	41847	345.216	1511834	0.49	1286	None	47	1511834	0	32166.7	41847	23109	91129	3235	48.58
BV18.H.bin.76	81.01	0.35	Neural Network (Specific Model)	11	0.91	70457	338.86	2247651	0.48	2015	None	45	2247651	0	49947.8	70457	29067	297367	2351	47.56
BV18.H.bin.79	98.18	0.16	Gradient Boost (General Model)	11	0.876	19687	307.138	2526291	0.54	2405	None	195	2526291	0	12955.3	19687	6129	53385	2071	53.74
BV18.H.bin.86	67.83	0.02	Neural Network (Specific Model)	11	0.875	54463	311.986	1540543	0.48	1442	None	46	1540543	0	33490.1	54463	16916	107414	2467	48.2
BV18.H.bin.88	91.73	1.33	Neural Network (Specific Model)	11	0.888	34897	321.427	2643454	0.65	2438	None	116	2643454	0	22788.4	34897	11228	200306	2144	65.45
BV18.H.bin.89	85.96	0.57	Neural Network (Specific Model)	11	0.908	19104	307.071	1735128	0.56	1714	None	140	1735128	0	12393.8	19104	5815	90831	2185	55.99
BV18.H.bin.91	54.52	0.08	Neural Network (Specific Model)	11	0.857	5678	271.156	986194	0.5	1041	None	198	986194	0	4980.78	5678	2726	21352	2029	49.52
BV18.H.bin.94	95.73	0.17	Gradient Boost (General Model)	11	0.877	20606	283.83	768890	0.48	794	None	54	768890	0	14238.7	20606	7233	40658	2103	47.87
BV18.H.bin.95	87.44	1.22	Neural Network (Specific Model)	11	0.911	22329	345	2053818	0.5	1811	None	119	2053818	0	17259	22329	9239	71483	2551	50.46
BV18.H.bin.98	97.58	0.35	Gradient Boost (General Model)	11	0.886	52267	333.678	3412036	0.41	3025	None	92	3412036	0	37087.3	52267	21185	208155	2061	41.22
BV19.bin.1	75.75	1.62	Neural Network (Specific Model)	11	0.909	6742	329.543	1739852	0.66	1602	None	304	1739852	0	5723.2	6742	3012	32159	2014	65.79
BV19.bin.6	92.3	0.11	Neural Network (Specific Model)	11	0.932	143432	385.118	2144880	0.57	1734	None	22	2144880	0	97494.6	143432	50412	236595	2620	56.53
BV19.bin.8	87.55	0.67	Neural Network (Specific Model)	11	0.906	17877	360.887	2465880	0.53	2066	None	177	2465880	0	13931.5	17877	6810	80834	2022	52.8
BV20.bin.12	98.45	3.64	Gradient Boost (General Model)	11	0.893	43661	304.093	3878093	0.44	3804	None	154	3878093	0	25182.4	43661	14178	122822	2009	43.69
BV20.bin.13	63.73	1.42	Neural Network (Specific Model)	11	0.93	12167	329.921	1332151	0.48	1254	None	153	1332151	0	8706.87	12167	4423	34749	2013	48.43
BV20.bin.17	75.93	0.39	Neural Network (Specific Model)	11	0.917	7057	313.987	1945746	0.48	1897	None	333	1945746	0	5843.08	7057	2864	35884	2007	48.31
BV20.bin.20	100	0.51	Neural Network (Specific Model)	11	0.845	31564	306.633	2797501	0.37	2572	None	123	2797501	0	22743.9	31564	11821	124649	2231	36.89
BV20.bin.22	98.41	2.77	Neural Network (Specific Model)	11	0.878	22296	296.01	2324712	0.52	2301	None	145	2324712	0	16032.5	22296	8388	79973	2042	51.78
BV20.bin.23	80.13	0.17	Neural Network (Specific Model)	11	0.925	196247	345.695	1711955	0.62	1529	None	12	1711955	0	142663	196247	104470	260700	7487	62.22
BV20.bin.32	85.46	0.04	Neural Network (Specific Model)	11	0.908	42968	352.99	2709872	0.47	2326	None	129	2709872	0	21006.8	42968	10777	107346	2025	47.45
BV20.bin.37	95.52	2.59	Neural Network (Specific Model)	11	0.9	37906	318.276	4656078	0.56	4394	None	207	4656078	0	22493.1	37906	10933	127404	2004	55.63
BV20.bin.39	61.59	0.28	Gradient Boost (General Model)	11	0.897	4955	292.394	1145583	0.38	1173	None	252	1145583	0	4545.96	4955	2476	26972	2004	37.8
BV20.bin.41	77.96	1.97	Neural Network (Specific Model)	11	0.923	6087	319.152	2035557	0.49	1965	None	387	2035557	0	5259.84	6087	2822	23913	2002	48.64
BV20.bin.42	77.51	0.64	Neural Network (Specific Model)	11	0.908	20802	302.524	2141842	0.59	2146	None	154	2141842	0	13908.1	20802	6491	128626	2010	58.91
BV20.bin.54	87.22	0.82	Neural Network (Specific Model)	11	0.925	15562	335.313	2415422	0.47	2225	None	245	2415422	0	9858.87	15562	4452	40618	2026	46.87
BV20.bin.59	92.22	2.47	Gradient Boost (General Model)	11	0.9	19198	306.97	1850818	0.6	1810	None	134	1850818	0	13812.1	19198	6809	76470	2025	60.18
BV20.bin.6	80.09	0.1	Neural Network (Specific Model)	11	0.902	34606	362.427	2181150	0.46	1812	None	107	2181150	0	20384.6	34606	9561	99392	2017	46.07
BV20.bin.8	63.11	0.12	Neural Network (Specific Model)	11	0.861	41146	306.57	598404	0.45	561	None	24	598404	0	24933.5	41146	12733	47135	2640	45.33
BV20.bin.9	88.69	3.53	Neural Network (Specific Model)	11	0.92	18479	347.143	2535523	0.48	2245	None	194	2535523	0	13069.7	18479	6503	67098	2050	48.15
BV21.bin.10	98.8	1.58	Gradient Boost (General Model)	11	0.901	43962	349.235	2166194	0.46	1865	None	76	2166194	0	28502.5	43962	15066	155333	2016	46.37
BV21.bin.102	69.84	0.04	Neural Network (Specific Model)	11	0.912	36854	354.723	1646348	0.5	1413	None	59	1646348	0	27904.2	36854	12431	126193	4480	50.23
BV21.bin.104	88.59	0.24	Neural Network (Specific Model)	11	0.922	34745	366.569	2259648	0.54	1897	None	87	2259648	0	25973	34745	13848	105918	2558	53.88
BV21.bin.105	75.07	0.01	Gradient Boost (General Model)	11	0.882	44397	334.685	2057396	0.46	1809	None	61	2057396	0	33727.8	44397	17521	178407	3116	45.63
BV21.bin.110	94.87	0.5	Neural Network (Specific Model)	11	0.901	73914	363.009	2578387	0.48	2135	None	56	2578387	0	46042.6	73914	21331	220841	2070	47.64
BV21.bin.123	65.62	1.09	Neural Network (Specific Model)	11	0.92	6519	288.384	1365924	0.6	1455	None	247	1365924	0	5530.06	6519	2719	34406	2003	60.48
BV21.bin.128	58.76	0.2	Neural Network (Specific Model)	11	0.888	71980	377.607	1353797	0.56	1062	None	28	1353797	0	48349.9	71980	21906	99270	8034	55.57
BV21.bin.130	74.99	1.62	Neural Network (Specific Model)	11	0.884	8250	315.743	2033379	0.48	1900	None	300	2033379	0	6777.93	8250	3398	39140	2009	48
BV21.bin.131	80.8	1.99	Neural Network (Specific Model)	11	0.914	49403	352.695	1824634	0.54	1579	None	51	1824634	0	35777.1	49403	17177	155006	7694	54.21
BV21.bin.133	96	0.42	Gradient Boost (General Model)	11	0.861	24314	320.228	2439228	0.56	2191	None	148	2439228	0	16481.3	24314	8495	55316	2216	55.57
BV21.bin.14	64.01	0.6	Neural Network (Specific Model)	11	0.905	4774	265.768	1143266	0.56	1301	None	281	1143266	0	4068.56	4774	2417	14160	2003	55.6
BV21.bin.140	85.2	0.08	Neural Network (Specific Model)	11	0.915	28095	356.305	1935835	0.54	1660	None	98	1935835	0	19753.4	28095	9744	79149	2351	53.54
BV21.bin.142	79.77	0.42	Gradient Boost (General Model)	11	0.92	68755	327.763	517269	0.49	485	None	11	517269	0	47024.4	68755	18488	136434	4807	48.54
BV21.bin.145	93.13	2.68	Neural Network (Specific Model)	11	0.907	73612	357.817	2563868	0.45	2169	None	64	2563868	0	40060.4	73612	24316	222338	2054	45.44
BV21.bin.146	85.07	0.5	Neural Network (Specific Model)	11	0.901	37483	326.533	2521410	0.45	2323	None	89	2521410	0	28330.5	37483	14828	110730	2535	45.31
BV21.bin.147	91.42	0.5	Neural Network (Specific Model)	11	0.885	55287	315.251	2630853	0.5	2468	None	97	2630853	0	27122.2	55287	12106	192044	2073	49.95
BV21.bin.15	98.38	0.83	Neural Network (Specific Model)	11	0.874	16659	308.864	2677869	0.44	2531	None	258	2677869	0	10379.3	16659	4241	90686	2021	43.68
BV21.bin.154	78.29	3.02	Gradient Boost (General Model)	11	0.867	5590	290.203	2349053	0.46	2342	None	487	2349053	0	4823.52	5590	2557	26164	2007	45.77
BV21.bin.2	91.67	1.26	Neural Network (Specific Model)	11	0.929	15836	346.214	2003496	0.53	1796	None	181	2003496	0	11069	15836	5282	44711	2120	53.21
BV21.bin.29	83.11	4.84	Neural Network (Specific Model)	11	0.914	11198	348.411	1989650	0.54	1741	None	232	1989650	0	8576.08	11198	4194	48341	2042	54.36
BV21.bin.3	97.28	0.05	Gradient Boost (General Model)	11	0.908	200558	367.046	1826750	0.48	1509	None	28	1826750	0	65241.1	200558	32142	418538	2913	47.58
BV21.bin.30	75.17	1.76	Gradient Boost (General Model)	11	0.935	4071	272.956	1481122	0.57	1696	None	382	1481122	0	3877.28	4071	2402	12969	2014	57
BV21.bin.36	98.01	0.13	Gradient Boost (General Model)	11	0.883	49064	317.916	2963845	0.42	2750	None	105	2963845	0	28227.1	49064	15244	141111	2148	42.35
BV21.bin.37	57.54	0.17	Neural Network (Specific Model)	11	0.924	5615	307.23	1149841	0.48	1155	None	230	1149841	0	4999.31	5615	2743	18917	2031	47.79
BV21.bin.40	81.16	0.4	Neural Network (Specific Model)	11	0.892	85772	343.567	1925890	0.5	1670	None	38	1925890	0	50681.3	85772	24248	152966	3266	50.26
BV21.bin.41	81.45	1.23	Neural Network (Specific Model)	11	0.887	28657	326.672	2011617	0.62	1824	None	110	2011617	0	18287.4	28657	8704	92222	2215	61.58
BV21.bin.45	83.01	0.77	Neural Network (Specific Model)	11	0.923	9951	321.919	1830114	0.57	1752	None	250	1830114	0	7320.46	9951	3625	29405	2006	57.13
BV21.bin.46	73.25	0.01	Neural Network (Specific Model)	11	0.903	76460	357.699	1871553	0.5	1577	None	37	1871553	0	50582.5	76460	27168	203033	3686	49.88
BV21.bin.48	96.33	3.58	Gradient Boost (General Model)	11	0.904	29571	328.322	2871947	0.44	2642	None	147	2871947	0	19537	29571	9955	114686	2051	44.13
BV21.bin.5	91.73	0.49	Gradient Boost (General Model)	11	0.913	21047	333.174	1499865	0.56	1371	None	107	1499865	0	14017.4	21047	7531	62704	2013	55.76
BV21.bin.51	62.19	0.37	Neural Network (Specific Model)	11	0.851	5774	272.047	529027	0.43	553	None	104	529027	0	5086.8	5774	2980	15563	2087	43.49
BV21.bin.52	78.46	1.26	Neural Network (Specific Model)	11	0.915	17812	349.679	2426877	0.44	2121	None	209	2426877	0	11611.9	17812	5031	56090	2028	44.48
BV21.bin.58	63.62	0.92	Gradient Boost (General Model)	11	0.909	13621	352.043	1665586	0.46	1435	None	177	1665586	0	9410.09	13621	4224	59463	2065	46.4
BV21.bin.65	93.09	0.23	Gradient Boost (General Model)	11	0.864	7118	294.862	1792423	0.41	1753	None	307	1792423	0	5838.51	7118	2882	42773	2035	41.1
BV21.bin.74	95.51	3.02	Gradient Boost (General Model)	11	0.895	46416	324.226	1615650	0.61	1488	None	53	1615650	0	30484	46416	18028	119950	2113	60.91
BV21.bin.77	79.27	2.38	Gradient Boost (General Model)	11	0.905	17392	326.613	2247726	0.45	2078	None	172	2247726	0	13068.2	17392	6310	90431	2070	44.6
BV21.bin.78	75.73	0.08	Neural Network (Specific Model)	11	0.9	62843	377.484	2021156	0.53	1609	None	51	2021156	0	39630.5	62843	21001	194028	2136	52.74
BV21.bin.89	93.76	0.15	Neural Network (Specific Model)	11	0.917	55417	367.671	2756282	0.55	2295	None	66	2756282	0	41761.8	55417	22364	169914	3714	55.05
BV21.bin.94	91.53	0.21	Neural Network (Specific Model)	11	0.919	31116	365.636	2439532	0.54	2047	None	120	2439532	0	20329.4	31116	9440	100623	2533	53.56
BV21.bin.98	67.69	0.96	Gradient Boost (General Model)	11	0.899	4610	266.4	1348358	0.43	1520	None	325	1348358	0	4148.79	4610	2389	22743	2009	42.85
BV21.bin.99	83.21	0.24	Neural Network (Specific Model)	11	0.919	27065	345.959	2302402	0.52	2044	None	111	2302402	0	20742.4	27065	10965	96925	2016	52.03
BV22.bin.100	56.21	0.15	Neural Network (Specific Model)	11	0.861	14053	295.211	545145	0.53	531	None	45	545145	0	12114.3	14053	5757	66880	2875	52.69
BV22.bin.104	82.11	3.56	Neural Network (Specific Model)	11	0.923	9952	328.153	2292314	0.47	2153	None	309	2292314	0	7418.49	9952	3494	40292	2007	47.44
BV22.bin.106	92.58	0.45	Neural Network (Specific Model)	11	0.895	30555	307.709	1988093	0.54	1930	None	94	1988093	0	21149.9	30555	11003	105309	2137	53.57
BV22.bin.113	84.14	0.13	Neural Network (Specific Model)	11	0.91	20788	332.674	2036152	0.49	1860	None	134	2036152	0	15195.2	20788	7906	60553	2015	49.5
BV22.bin.119	97.01	0.32	Gradient Boost (General Model)	11	0.907	39887	329.064	2047133	0.57	1883	None	82	2047133	0	24965	39887	12234	108320	2179	56.6
BV22.bin.120	82.55	0.04	Gradient Boost (General Model)	11	0.917	14007	323.064	1373926	0.56	1302	None	139	1373926	0	9884.36	14007	4829	50773	2029	55.93
BV22.bin.124	76.56	0.38	Neural Network (Specific Model)	11	0.884	10477	309.168	1846652	0.45	1763	None	249	1846652	0	7416.27	10477	3191	46851	2032	44.88
BV22.bin.13	68.89	3.09	Gradient Boost (General Model)	11	0.92	4379	267.033	1041618	0.57	1198	None	251	1041618	0	4149.87	4379	2413	16253	2008	56.7
BV22.bin.133	89.74	0.66	Neural Network (Specific Model)	11	0.925	75936	374.064	2040482	0.52	1684	None	38	2040482	0	53696.9	75936	24813	206153	5378	52.36
BV22.bin.134	87.35	2.67	Neural Network (Specific Model)	11	0.892	10781	308.075	2182901	0.48	2110	None	273	2182901	0	7995.97	10781	3783	45813	2001	47.88
BV22.bin.137	99.96	0.05	Neural Network (Specific Model)	11	0.915	45816	346	2134519	0.5	1884	None	70	2134519	0	30493.1	45816	13841	110622	3992	50.47
BV22.bin.139	94.83	0.27	Neural Network (Specific Model)	11	0.896	52067	378.487	2208742	0.52	1744	None	58	2208742	0	38081.8	52067	20691	117242	4173	51.95
BV22.bin.143	70.14	0.62	Neural Network (Specific Model)	11	0.871	38784	306.812	1886766	0.52	1788	None	67	1886766	0	28160.7	38784	14226	81191	3533	52.44
BV22.bin.148	97.78	0.14	Gradient Boost (General Model)	11	0.888	63168	327.235	1992728	0.48	1805	None	50	1992728	0	39854.6	63168	20709	128336	3921	47.69
BV22.bin.26	87.13	2.09	Neural Network (Specific Model)	11	0.901	43250	329.901	3497695	0.44	3189	None	131	3497695	0	26700	43250	13617	134947	2027	44.13
BV22.bin.28	67.26	0.08	Gradient Boost (General Model)	11	0.876	20054	298.21	1586834	0.43	1556	None	132	1586834	0	12021.5	20054	5360	57836	2084	42.87
BV22.bin.3	86.13	0.22	Neural Network (Specific Model)	11	0.909	23879	351.167	2120477	0.5	1833	None	142	2120477	0	14932.9	23879	7292	72799	2009	49.97
BV22.bin.31	83.37	2.67	Gradient Boost (General Model)	11	0.876	9452	305.659	2236663	0.59	2140	None	315	2236663	0	7100.52	9452	3094	109373	2004	59.47
BV22.bin.32	75.58	1.12	Neural Network (Specific Model)	11	0.895	41771	353.808	1850054	0.47	1561	None	69	1850054	0	26812.4	41771	13000	199086	2273	46.69
BV22.bin.42	87.08	0.9	Neural Network (Specific Model)	11	0.931	18809	342.855	1892722	0.48	1716	None	158	1892722	0	11979.2	18809	5273	66664	2006	48.36
BV22.bin.43	94.64	0.63	Gradient Boost (General Model)	11	0.883	45858	316.943	1898823	0.41	1765	None	65	1898823	0	29212.7	45858	13964	157708	2200	40.77
BV22.bin.45	51.49	0	Neural Network (Specific Model)	11	0.903	26836	339.097	1160309	0.46	1031	None	70	1160309	0	16575.8	26836	8114	63115	2038	45.77
BV22.bin.47	79.22	0.22	Gradient Boost (General Model)	11	0.921	10008	314.17	1643525	0.49	1609	None	213	1643525	0	7716.08	10008	3860	35886	2080	48.73
BV22.bin.55	99.85	0.22	Neural Network (Specific Model)	11	0.945	29101	369.163	1996916	0.52	1707	None	87	1996916	0	22953.1	29101	12123	86920	3005	52.36
BV22.bin.61	81.14	1.96	Neural Network (Specific Model)	11	0.914	12385	340.409	2244599	0.46	2012	None	247	2244599	0	9087.45	12385	4331	36482	2028	46.09
BV22.bin.63	75.93	4.22	Neural Network (Specific Model)	11	0.928	5898	319.689	2047940	0.48	1984	None	399	2047940	0	5132.68	5898	2715	26532	2002	48.42
BV22.bin.66	75.25	1.92	Neural Network (Specific Model)	11	0.923	15641	359.748	2827457	0.5	2422	None	267	2827457	0	10589.7	15641	5078	56952	2026	49.66
BV22.bin.70	98.39	2.37	Gradient Boost (General Model)	11	0.879	127545	298.147	2328679	0.52	2290	None	32	2328679	0	72771.2	127545	35215	285791	5305	52.43
BV22.bin.81	80.27	4.52	Gradient Boost (General Model)	11	0.928	21856	332.072	1504240	0.63	1404	None	94	1504240	0	16002.5	21856	8375	88134	2056	63.41
BV22.bin.84	86.6	2.82	Neural Network (Specific Model)	11	0.916	22359	346.479	2336279	0.52	2063	None	131	2336279	0	17834.2	22359	9600	70740	2180	52.21
BV22.bin.90	88.81	0.42	Gradient Boost (General Model)	11	0.886	22371	331.717	1847260	0.4	1647	None	151	1847260	0	12233.5	22371	4953	101084	2068	39.87
BV22.bin.95	82.04	2.66	Gradient Boost (General Model)	11	0.909	6789	306.321	1563569	0.43	1549	None	271	1563569	0	5769.63	6789	2958	27582	2001	43.34
BV23.bin.101	90.36	0	Gradient Boost (General Model)	11	0.881	101884	317.642	1908648	0.44	1766	None	31	1908648	0	61569.3	101884	30017	291176	3992	43.95
BV23.bin.105	81.87	2.9	Neural Network (Specific Model)	11	0.904	17804	348.225	2208550	0.54	1914	None	183	2208550	0	12068.6	17804	5238	79447	2032	53.91
BV23.bin.107	63.74	1.34	Neural Network (Specific Model)	11	0.907	4898	291.624	1235706	0.49	1283	None	278	1235706	0	4444.99	4898	2580	26064	2001	48.89
BV23.bin.108	81.96	0.27	Neural Network (Specific Model)	11	0.923	75555	364.105	1672149	0.56	1415	None	36	1672149	0	46448.6	75555	25493	219991	3026	55.76
BV23.bin.11	92.46	3.54	Neural Network (Specific Model)	11	0.909	20604	336.02	2572859	0.52	2324	None	190	2572859	0	13541.4	20604	6703	50974	2037	52.41
BV23.bin.112	96.96	2.87	Gradient Boost (General Model)	11	0.85	99616	301.548	3062183	0.5	2882	None	50	3062183	0	61243.7	99616	29762	341320	2326	50.17
BV23.bin.116	94.22	2.24	Neural Network (Specific Model)	11	0.912	110343	342.781	2317211	0.43	2059	None	30	2317211	0	77240.4	110343	30289	320967	13682	43.35
BV23.bin.117	95.7	0.11	Gradient Boost (General Model)	11	0.926	41383	336.057	1029438	0.48	948	None	29	1029438	0	35497.9	41383	20391	123704	7207	48.3
BV23.bin.118	74.23	1.39	Gradient Boost (General Model)	11	0.871	4743	270.24	1662939	0.54	1791	None	375	1662939	0	4434.5	4743	2528	21710	2012	54.21
BV23.bin.126	99.85	0.01	Neural Network (Specific Model)	11	0.88	163159	329.555	2680392	0.44	2390	None	30	2680392	0	89346.4	163159	41334	235337	5717	44.28
BV23.bin.13	86.83	1.42	Gradient Boost (General Model)	11	0.886	7818	289.246	2182028	0.48	2232	None	354	2182028	0	6163.92	7818	2946	24948	2009	47.98
BV23.bin.131	72.14	4.08	Neural Network (Specific Model)	11	0.904	15831	341.522	1735891	0.52	1535	None	140	1735891	0	12399.2	15831	6331	52147	2016	52.41
BV23.bin.138	99.46	1.37	Neural Network (Specific Model)	11	0.918	96188	389.167	2975842	0.53	2343	None	63	2975842	0	47235.6	96188	22927	265299	2422	53.01
BV23.bin.140	82.8	1.11	Neural Network (Specific Model)	11	0.903	33532	319.551	2840613	0.45	2682	None	126	2840613	0	22544.5	33532	11597	138456	2016	44.63
BV23.bin.142	96.38	1.3	Gradient Boost (General Model)	11	0.904	426220	340.11	3681042	0.5	3264	None	19	3681042	0	193739	426220	70678	684232	13880	50.41
BV23.bin.144	94.32	0.14	Neural Network (Specific Model)	11	0.91	37862	337.09	2348230	0.5	2117	None	93	2348230	0	25249.8	37862	12087	123042	2228	49.73
BV23.bin.147	77.72	0.3	Neural Network (Specific Model)	11	0.913	20519	337.851	1689399	0.55	1525	None	119	1689399	0	14196.6	20519	6951	48019	2104	54.77
BV23.bin.149	66.43	2.39	Gradient Boost (General Model)	11	0.893	4870	260.354	611930	0.45	701	None	142	611930	0	4309.37	4870	2534	12576	2013	45.43
BV23.bin.17	88.35	1.96	Gradient Boost (General Model)	11	0.92	8421	308.065	1395798	0.53	1391	None	219	1395798	0	6373.51	8421	3151	35478	2019	52.78
BV23.bin.2	87.17	0	Neural Network (Specific Model)	11	0.914	50313	366.266	2682075	0.52	2236	None	71	2682075	0	37775.7	50313	19651	130897	7458	51.55
BV23.bin.26	83.48	0	Neural Network (Specific Model)	11	0.921	249519	339.85	1765919	0.45	1597	None	14	1765919	0	126137	249519	64069	762988	2180	45.16
BV23.bin.27	92.5	0.23	Neural Network (Specific Model)	11	0.915	56254	382.573	2595573	0.53	2073	None	68	2595573	0	38170.2	56254	16918	193198	3094	53.27
BV23.bin.34	97.86	0.67	Neural Network (Specific Model)	11	0.908	67193	367.388	2310832	0.55	1906	None	59	2310832	0	39166.6	67193	19565	174235	2106	54.67
BV23.bin.39	98.71	1.34	Gradient Boost (General Model)	11	0.919	21945	309.544	1747672	0.6	1732	None	110	1747672	0	15887.9	21945	7758	70568	2074	59.87
BV23.bin.4	67.39	2.05	Neural Network (Specific Model)	11	0.886	8291	292.458	1922594	0.61	1945	None	288	1922594	0	6675.67	8291	3309	89269	2009	61.07
BV23.bin.40	51.34	0	Gradient Boost (General Model)	11	0.926	3840	268.145	669482	0.49	772	None	184	669482	0	3638.49	3840	2306	11113	2000	49.1
BV23.bin.42	94.55	0.81	Gradient Boost (General Model)	11	0.916	27697	327.444	2567958	0.48	2399	None	145	2567958	0	17710	27697	8878	105542	2125	48.07
BV23.bin.45	66.82	0.14	Neural Network (Specific Model)	11	0.92	39706	359.925	1592706	0.57	1358	None	60	1592706	0	26545.1	39706	15027	102961	2223	56.86
BV23.bin.53	83	0.02	Neural Network (Specific Model)	11	0.911	19130	353.72	2395432	0.44	2058	None	179	2395432	0	13382.3	19130	6162	71365	2018	43.54
BV23.bin.60	79.2	0.25	Neural Network (Specific Model)	11	0.928	6977	319.097	1692218	0.53	1644	None	283	1692218	0	5979.57	6977	3121	26855	2003	53.38
BV23.bin.69	91.02	2.58	Gradient Boost (General Model)	11	0.867	7087	282.161	2439733	0.48	2502	None	410	2439733	0	5950.57	7087	3021	24442	2000	47.85
BV23.bin.75	92.07	0.15	Gradient Boost (General Model)	11	0.882	50442	326.485	2658140	0.43	2398	None	96	2658140	0	27689	50442	14938	159515	2044	42.72
BV23.bin.82	94.66	0.55	Neural Network (Specific Model)	11	0.919	29064	317.935	2085840	0.56	2015	None	100	2085840	0	20858.4	29064	10324	103705	2094	55.9
BV23.bin.89	61.34	0.91	Gradient Boost (General Model)	11	0.879	3892	281.609	1100411	0.57	1147	None	299	1100411	0	3680.3	3892	2282	13758	2009	56.72
BV23.bin.9	95.63	0.1	Gradient Boost (General Model)	11	0.92	149767	379.177	2328152	0.5	1885	None	38	2328152	0	61267.2	149767	25310	354717	2213	49.55
BV23.bin.95	78.11	1.3	Gradient Boost (General Model)	11	0.941	5052	309.022	1200361	0.54	1220	None	258	1200361	0	4652.56	5052	2687	20942	2002	53.84
BV23.bin.96	85.82	0.12	Neural Network (Specific Model)	11	0.902	27685	320.549	2183227	0.51	2051	None	134	2183227	0	16292.7	27685	7326	84238	2022	50.94
BV23.bin.97	91.6	2.31	Neural Network (Specific Model)	11	0.902	74091	336.675	2946847	0.44	2636	None	66	2946847	0	44649.2	74091	29044	187797	2352	44.1
BV23.bin.99	61.62	0.88	Neural Network (Specific Model)	11	0.872	9507	300.737	1412298	0.42	1367	None	202	1412298	0	6991.57	9507	3121	48623	2031	41.57
BV24.bin.10	83.66	0.87	Neural Network (Specific Model)	11	0.889	29166	328.095	3016575	0.48	2728	None	153	3016575	0	19716.2	29166	9404	79936	2281	48.02
BV24.bin.101	99.8	2.99	Neural Network (Specific Model)	11	0.905	73491	316.466	2288367	0.54	2187	None	56	2288367	0	40863.7	73491	20733	152452	2497	54.36
BV24.bin.104	98.02	0.07	Neural Network (Specific Model)	11	0.893	27675	360.959	2421113	0.52	1998	None	127	2421113	0	19063.9	27675	8757	91848	2288	52.37
BV24.bin.109	98.52	1.95	Neural Network (Specific Model)	11	0.868	131303	301.871	2670424	0.51	2564	None	30	2670424	0	89014.1	131303	52637	267120	3477	50.79
BV24.bin.110	63.54	0.12	Gradient Boost (General Model)	11	0.931	5480	337.979	1574266	0.56	1447	None	314	1574266	0	5013.59	5480	2764	26691	2002	55.57
BV24.bin.111	77.87	0.59	Gradient Boost (General Model)	11	0.903	61243	329.968	2621042	0.43	2394	None	73	2621042	0	35904.7	61243	21620	260807	2051	43.5
BV24.bin.119	88.94	0.06	Neural Network (Specific Model)	11	0.907	30412	325.225	2060014	0.57	1920	None	95	2060014	0	21684.4	30412	10579	126617	2085	57.1
BV24.bin.120	95.34	0.18	Neural Network (Specific Model)	11	0.893	30296	305.057	1830718	0.55	1790	None	98	1830718	0	18680.8	30296	10070	88386	2117	54.92
BV24.bin.129	92.47	0	Neural Network (Specific Model)	11	0.905	39783	352.833	2161088	0.56	1851	None	75	2161088	0	28814.5	39783	14056	118900	2209	56.47
BV24.bin.131	84.33	1.25	Neural Network (Specific Model)	11	0.922	20201	348.096	2264842	0.47	2002	None	149	2264842	0	15200.3	20201	7950	60964	2084	47.08
BV24.bin.134	89.69	0.45	Neural Network (Specific Model)	11	0.899	27720	334.02	2812813	0.51	2527	None	165	2812813	0	17047.3	27720	8020	99767	2166	51.48
BV24.bin.136	78.93	3.19	Neural Network (Specific Model)	11	0.908	6719	310.341	2532622	0.46	2475	None	463	2532622	0	5470.03	6719	2668	28776	2001	46.22
BV24.bin.139	82.91	0.18	Neural Network (Specific Model)	11	0.903	59656	306.093	1271629	0.34	1252	None	33	1271629	0	38534.2	59656	23897	172469	2521	33.94
BV24.bin.14	92.22	2.48	Gradient Boost (General Model)	11	0.917	8004	295.626	2265318	0.48	2347	None	363	2265318	0	6240.55	8004	2817	40824	2012	47.83
BV24.bin.141	69.71	1.74	Neural Network (Specific Model)	11	0.891	4756	277.336	1935186	0.51	2078	None	446	1935186	0	4338.98	4756	2440	17247	2001	50.57
BV24.bin.147	99.08	1.31	Neural Network (Specific Model)	11	0.888	54745	308.108	2409490	0.5	2320	None	90	2409490	0	26772.1	54745	12691	225458	2000	49.73
BV24.bin.154	96.04	2.84	Neural Network (Specific Model)	11	0.892	48250	320.901	2478179	0.47	2299	None	98	2478179	0	25287.5	48250	12256	108429	2106	47.27
BV24.bin.157	63.87	2.41	Gradient Boost (General Model)	11	0.924	13579	327.594	1283870	0.63	1208	None	136	1283870	0	9440.22	13579	3991	49266	2011	63.03
BV24.bin.158	80.56	0.61	Neural Network (Specific Model)	11	0.891	35686	368.555	2548050	0.49	2055	None	114	2548050	0	22351.3	35686	11341	136419	2019	48.56
BV24.bin.20	75.71	0.29	Neural Network (Specific Model)	11	0.926	42492	369.686	2178492	0.49	1822	None	91	2178492	0	23939.5	42492	12323	160339	2160	48.54
BV24.bin.23	99.75	0	Neural Network (Specific Model)	11	0.889	126845	328.066	2339885	0.53	2118	None	26	2339885	0	89995.6	126845	68133	228639	4262	53.07
BV24.bin.25	93.61	2.42	Gradient Boost (General Model)	11	0.883	10764	279.604	908953	0.45	959	None	113	908953	0	8043.83	10764	3852	29926	2219	44.95
BV24.bin.30	56.29	0.06	Neural Network (Specific Model)	11	0.919	69511	367.009	1467965	0.53	1228	None	34	1467965	0	43175.4	69511	21980	140349	7155	53.26
BV24.bin.31	78.47	0.22	Neural Network (Specific Model)	11	0.896	64435	320.081	2069811	0.44	1934	None	40	2069811	0	51745.3	64435	28584	370257	4714	43.72
BV24.bin.33	56.1	0	Neural Network (Specific Model)	11	0.907	66530	352.068	1497293	0.49	1288	None	40	1497293	0	37432.3	66530	16479	165354	3706	49.29
BV24.bin.37	82.75	2.36	Gradient Boost (General Model)	11	0.909	13341	316.438	1695952	0.56	1627	None	190	1695952	0	8926.06	13341	3624	50897	2009	55.63
BV24.bin.39	100	0.02	Gradient Boost (General Model)	11	0.916	111582	339.164	2113106	0.43	1905	None	42	2113106	0	50312.1	111582	26725	279377	2200	42.93
BV24.bin.40	71.08	4.05	Gradient Boost (General Model)	11	0.894	6927	292.805	2355753	0.46	2402	None	420	2355753	0	5608.94	6927	2917	28967	2003	45.57
BV24.bin.42	78.38	0.2	Neural Network (Specific Model)	11	0.903	32084	372.238	2113846	0.53	1712	None	101	2113846	0	20929.2	32084	10120	80259	2589	52.84
BV24.bin.46	62.72	1.7	Gradient Boost (General Model)	11	0.947	4364	306.655	1038081	0.54	1070	None	260	1038081	0	3992.62	4364	2465	10784	2000	54.28
BV24.bin.53	85.7	0.14	Neural Network (Specific Model)	11	0.907	22601	344.568	2168034	0.5	1906	None	141	2168034	0	15376.1	22601	7845	76072	2426	49.73
BV24.bin.57	75.55	1.59	Gradient Boost (General Model)	11	0.932	5047	311.761	1680317	0.54	1678	None	359	1680317	0	4680.55	5047	2653	20124	2007	54.41
BV24.bin.58	83.26	1.59	Neural Network (Specific Model)	11	0.916	9886	315.748	2262152	0.48	2191	None	305	2262152	0	7416.89	9886	3569	39210	2016	48.23
BV24.bin.59	76.73	1.68	Neural Network (Specific Model)	11	0.917	29456	358.286	2502234	0.48	2138	None	155	2502234	0	16143.5	29456	6939	106337	2029	47.55
BV24.bin.61	92.5	4.18	Gradient Boost (General Model)	11	0.862	56288	260.714	1316936	0.29	1459	None	33	1316936	0	39907.2	56288	22694	130596	3694	28.62
BV24.bin.66	98.17	0.29	Gradient Boost (General Model)	11	0.932	97099	368.436	1567433	0.57	1324	None	23	1567433	0	68149.3	97099	39370	410566	4789	57.08
BV24.bin.7	83.34	0.1	Neural Network (Specific Model)	11	0.898	34201	362.393	2585466	0.51	2139	None	94	2585466	0	27505	34201	16147	160245	2093	50.75
BV24.bin.74	96.49	0.06	Gradient Boost (General Model)	11	0.906	40417	315.016	1782965	0.42	1712	None	67	1782965	0	26611.4	40417	13760	134250	2125	41.51
BV24.bin.79	93.19	2.88	Gradient Boost (General Model)	11	0.905	40187	347.116	1892441	0.59	1646	None	85	1892441	0	22264	40187	12277	131972	2061	58.75
BV24.bin.84	98.02	0.01	Gradient Boost (General Model)	11	0.907	148761	346.065	3267128	0.49	2861	None	39	3267128	0	83772.5	148761	40193	273511	3213	48.53
BV24.bin.85	87.4	3.23	Neural Network (Specific Model)	11	0.889	72708	368.931	2481619	0.54	1996	None	58	2481619	0	42786.5	72708	21690	140590	2514	53.92
BV24.bin.93	72.88	0.82	Gradient Boost (General Model)	11	0.922	8313	310.975	1151451	0.49	1140	None	176	1151451	0	6542.34	8313	3174	32335	2016	49.14
BV25.bin.101	69.13	0.31	Neural Network (Specific Model)	11	0.884	23153	339.427	1767974	0.48	1537	None	92	1767974	0	19217.1	23153	10246	65769	2617	48.44
BV25.bin.104	65.24	0.9	Neural Network (Specific Model)	11	0.933	6123	296.79	1367060	0.46	1435	None	254	1367060	0	5382.13	6123	2689	27002	2008	46.33
BV25.bin.105	72.7	0.28	Neural Network (Specific Model)	11	0.902	10110	325.724	1590030	0.46	1470	None	215	1590030	0	7395.49	10110	3272	29209	2011	46.23
BV25.bin.106	59.03	1.32	Gradient Boost (General Model)	11	0.93	5304	297.723	740081	0.47	772	None	155	740081	0	4774.72	5304	2531	20602	2013	46.93
BV25.bin.110	94.3	1.13	Gradient Boost (General Model)	11	0.943	8865	331.933	1390732	0.54	1319	None	194	1390732	0	7168.72	8865	3629	24317	2072	53.68
BV25.bin.112	99.95	0.55	Gradient Boost (General Model)	11	0.891	131621	317.523	2118909	0.51	1985	None	25	2118909	0	84756.4	131621	46506	411707	2621	50.89
BV25.bin.114	97.62	3.33	Gradient Boost (General Model)	11	0.902	33757	299.502	2038523	0.41	2049	None	147	2038523	0	13867.5	33757	5046	149720	2022	41.4
BV25.bin.115	95.14	1.12	Neural Network (Specific Model)	11	0.909	38000	352.718	1719403	0.61	1479	None	82	1719403	0	20968.3	38000	9972	110859	2250	60.95
BV25.bin.12	90.52	2.14	Gradient Boost (General Model)	11	0.88	6936	292.777	2146265	0.55	2154	None	378	2146265	0	5677.95	6936	2939	25750	2013	54.7
BV25.bin.25	86.97	2.45	Neural Network (Specific Model)	11	0.904	99118	349.719	3299037	0.44	2848	None	71	3299037	0	46465.3	99118	25379	275274	2391	43.83
BV25.bin.28	96.43	4.35	Gradient Boost (General Model)	11	0.917	55707	329.381	2529832	0.5	2352	None	68	2529832	0	37203.4	55707	21175	172060	2219	50.08
BV25.bin.3	75.03	4.08	Gradient Boost (General Model)	11	0.914	9332	302.605	2101171	0.45	2119	None	318	2101171	0	6607.46	9332	3039	36207	2007	45.39
BV25.bin.34	92.02	0.85	Neural Network (Specific Model)	11	0.906	28551	328.003	2108553	0.58	1946	None	110	2108553	0	19168.7	28551	9235	122776	2294	57.58
BV25.bin.35	78.59	0.22	Neural Network (Specific Model)	11	0.927	6011	339.948	2134891	0.55	1943	None	404	2134891	0	5284.38	6011	2801	19345	2009	54.54
BV25.bin.38	99.72	0.04	Neural Network (Specific Model)	11	0.91	51276	360.1	2843176	0.47	2398	None	83	2843176	0	34255.1	51276	19796	134180	2072	47.04
BV25.bin.41	97.34	2.84	Gradient Boost (General Model)	11	0.899	91013	324.244	3374996	0.5	3126	None	77	3374996	0	43831.1	91013	24165	324659	2005	50.28
BV25.bin.55	80.09	0.5	Neural Network (Specific Model)	11	0.91	18099	373.538	2031949	0.53	1652	None	170	2031949	0	11952.6	18099	5652	54821	2002	53.11
BV25.bin.56	85.05	3.5	Neural Network (Specific Model)	11	0.855	9738	296.913	2672310	0.49	2569	None	367	2672310	0	7281.5	9738	3269	40815	2016	48.62
BV25.bin.58	79.75	4.33	Gradient Boost (General Model)	11	0.877	9393	288.711	3027825	0.56	3072	None	468	3027825	0	6469.71	9393	2909	35084	2002	55.71
BV25.bin.66	88.62	2.4	Gradient Boost (General Model)	11	0.898	7400	296.344	2038743	0.48	2063	None	343	2038743	0	5943.86	7400	2987	28817	2002	47.59
BV25.bin.7	87.59	3.79	Neural Network (Specific Model)	11	0.87	21097	311.729	2630270	0.62	2449	None	175	2630270	0	15030.1	21097	7159	88090	2084	62.41
BV25.bin.76	96.13	1.54	Gradient Boost (General Model)	11	0.906	16856	307.606	1623389	0.56	1597	None	125	1623389	0	12987.1	16856	7495	47468	2069	56.05
BV25.bin.78	85.35	0.59	Gradient Boost (General Model)	11	0.944	15421	372.799	1703219	0.58	1440	None	148	1703219	0	11508.2	15421	5604	66089	2176	58.09
BV25.bin.79	95.25	1.74	Gradient Boost (General Model)	11	0.877	91359	329.105	3675003	0.5	3267	None	65	3675003	0	56538.5	91359	33533	223295	2322	50.38
BV25.bin.8	88.64	2.12	Gradient Boost (General Model)	11	0.877	55617	341.342	2532315	0.48	2171	None	81	2532315	0	31263.2	55617	15698	117156	2324	47.83
BV25.bin.82	72.02	0.89	Gradient Boost (General Model)	11	0.871	5852	286.281	1597574	0.49	1623	None	309	1597574	0	5170.14	5852	2667	25012	2020	48.52
BV25.bin.85	99.13	0.04	Gradient Boost (General Model)	11	0.875	51096	326.324	1892470	0.53	1695	None	71	1892470	0	26654.5	51096	12902	100352	2137	52.59
BV25.bin.88	53.21	0.44	Gradient Boost (General Model)	11	0.905	4940	281.826	1003328	0.6	1075	None	220	1003328	0	4560.58	4940	2686	15586	2041	59.69
BV25.bin.90	80.59	0.01	Neural Network (Specific Model)	11	0.906	14547	351.515	1922434	0.54	1653	None	175	1922434	0	10985.3	14547	5450	37142	2222	54.19
BV25.bin.92	87.98	0.53	Gradient Boost (General Model)	11	0.878	28335	325.347	2461791	0.57	2218	None	133	2461791	0	18509.7	28335	8492	92264	2055	56.58
BV27.bin.1	85.19	3.48	Gradient Boost (General Model)	11	0.88	7937	306.877	3533749	0.51	3382	None	566	3533749	0	6243.37	7937	3010	32285	2012	50.86
BV27.bin.11	82.99	0.99	Neural Network (Specific Model)	11	0.919	34210	332.612	2424426	0.5	2236	None	100	2424426	0	24244.3	34210	12029	125384	2123	49.93
BV27.bin.13	71.51	1.73	Neural Network (Specific Model)	11	0.859	3906	271.198	2003456	0.46	2117	None	524	2003456	0	3823.39	3906	2335	18886	2000	45.69
BV27.bin.16	82.73	3.45	Gradient Boost (General Model)	11	0.925	5171	298.831	1312058	0.61	1356	None	289	1312058	0	4539.99	5171	2485	24338	2002	61.16
BV27.bin.2	82.48	1.16	Neural Network (Specific Model)	11	0.897	79087	329.522	2280962	0.66	2073	None	48	2280962	0	47520	79087	21884	150856	3081	66.17
BV27.bin.23	85.46	0	Gradient Boost (General Model)	11	0.871	62785	313.782	2433349	0.53	2255	None	75	2433349	0	32444.7	62785	18883	188115	2011	53.1
BV27.bin.24	81.12	3.46	Gradient Boost (General Model)	11	0.915	5565	313.842	2006726	0.56	1953	None	410	2006726	0	4894.45	5565	2698	20409	2005	56.18
BV27.bin.3	65.17	2.47	Neural Network (Specific Model)	11	0.912	4525	304.365	1584829	0.58	1585	None	378	1584829	0	4192.67	4525	2461	16251	2007	57.88
BV27.bin.4	71.51	3.88	Neural Network (Specific Model)	11	0.907	4394	285.407	2207506	0.47	2344	None	545	2207506	0	4050.47	4394	2350	19543	2002	46.54
BV27.bin.6	88.93	3.33	Gradient Boost (General Model)	11	0.898	11519	286.094	4219919	0.43	4427	None	497	4219919	0	8490.78	11519	3949	88294	2000	42.52
BV27.bin.7	53	0.34	Gradient Boost (General Model)	11	0.916	4180	315.935	1365262	0.54	1321	None	349	1365262	0	3911.93	4180	2447	12824	2004	53.62
BV28.bin.1	96.61	2.53	Gradient Boost (General Model)	11	0.93	33062	370.826	1935771	0.52	1621	None	84	1935771	0	23044.9	33062	11927	78190	2537	51.67
BV28.bin.100	71.21	0.04	Neural Network (Specific Model)	11	0.922	8250	317.786	1212981	0.51	1175	None	172	1212981	0	7052.22	8250	3591	29455	2103	51.39
BV28.bin.102	72.48	2.2	Gradient Boost (General Model)	11	0.886	4660	280.295	1376190	0.47	1452	None	321	1376190	0	4287.2	4660	2462	14669	2012	47.35
BV28.bin.104	65.03	2.31	Neural Network (Specific Model)	11	0.934	4719	306.884	1470444	0.58	1494	None	326	1470444	0	4510.56	4719	2657	18682	2003	57.78
BV28.bin.119	84.77	2.8	Neural Network (Specific Model)	11	0.918	14269	344.725	2563169	0.51	2280	None	247	2563169	0	10377.2	14269	5115	53878	2036	50.64
BV28.bin.122	79.54	1.1	Neural Network (Specific Model)	11	0.915	7644	310.43	1900789	0.51	1872	None	295	1900789	0	6443.35	7644	3621	30456	2011	50.72
BV28.bin.125	85.28	4.97	Gradient Boost (General Model)	11	0.918	12118	324.902	1617351	0.61	1525	None	200	1617351	0	8086.75	12118	3447	173732	2031	60.69
BV28.bin.127	99.12	1.6	Gradient Boost (General Model)	11	0.933	34691	363.666	1823654	0.53	1562	None	90	1823654	0	20262.8	34691	8858	85132	2670	52.77
BV28.bin.128	91.78	0.01	Gradient Boost (General Model)	11	0.887	16306	307.246	2133162	0.48	2057	None	199	2133162	0	10719.4	16306	4583	45766	2035	47.89
BV28.bin.129	83.72	0.09	Neural Network (Specific Model)	11	0.899	54105	353.007	2040053	0.51	1734	None	58	2040053	0	35173.3	54105	17033	135067	2396	50.69
BV28.bin.135	73.21	1.79	Neural Network (Specific Model)	11	0.902	5389	274.145	1430443	0.56	1571	None	292	1430443	0	4898.78	5389	2750	18449	2002	55.55
BV28.bin.139	93.44	1.75	Gradient Boost (General Model)	11	0.908	113541	332.31	1707817	0.58	1557	None	32	1707817	0	53369.3	113541	24567	263658	2208	57.88
BV28.bin.14	91.66	2.21	Neural Network (Specific Model)	11	0.873	14297	297.561	2284230	0.45	2238	None	247	2284230	0	9247.89	14297	3719	72614	2020	44.98
BV28.bin.19	93.71	1.6	Gradient Boost (General Model)	11	0.91	42862	375.021	1843969	0.53	1494	None	62	1843969	0	29741.4	42862	16126	104763	2673	52.85
BV28.bin.28	83.04	3.87	Gradient Boost (General Model)	11	0.926	8429	334.068	2185207	0.54	2022	None	332	2185207	0	6581.95	8429	3378	22196	2041	53.85
BV28.bin.29	97.12	4.82	Neural Network (Specific Model)	11	0.884	21157	293.07	2403666	0.5	2419	None	162	2403666	0	14837.4	21157	7159	82928	2081	50.11
BV28.bin.3	82.24	0.1	Neural Network (Specific Model)	11	0.917	76908	342.504	1916276	0.47	1713	None	41	1916276	0	46738.4	76908	24739	136378	2705	46.64
BV28.bin.31	67.27	0.53	Neural Network (Specific Model)	11	0.93	6653	328.803	1855170	0.53	1752	None	328	1855170	0	5656.01	6653	3085	20795	2022	53.46
BV28.bin.32	75.2	2.27	Gradient Boost (General Model)	11	0.918	6806	303.569	1751331	0.49	1769	None	314	1751331	0	5577.49	6806	2760	23363	2004	49.01
BV28.bin.33	100	0.11	Gradient Boost (General Model)	11	0.938	37711	387.625	2083987	0.57	1684	None	85	2083987	0	24517.5	37711	12163	124315	2034	56.89
BV28.bin.39	88.04	0.92	Gradient Boost (General Model)	11	0.896	25959	337.129	2764448	0.49	2454	None	190	2764448	0	14549.7	25959	6398	80461	2046	48.68
BV28.bin.4	86.81	0.4	Neural Network (Specific Model)	11	0.912	72456	355.485	2051686	0.45	1756	None	36	2051686	0	56991.3	72456	33200	167342	2417	44.76
BV28.bin.45	74.27	2.55	Neural Network (Specific Model)	11	0.92	5911	325.693	2047222	0.49	1931	None	379	2047222	0	5401.64	5911	2830	31118	2018	48.52
BV28.bin.46	91.23	0.15	Gradient Boost (General Model)	11	0.902	88396	323.566	2174150	0.43	2025	None	34	2174150	0	63945.6	88396	38560	197660	2511	43.33
BV28.bin.54	74.23	3.3	Neural Network (Specific Model)	11	0.924	19145	339.227	2454200	0.49	2232	None	192	2454200	0	12782.3	19145	6046	62470	2089	49.47
BV28.bin.55	99.93	0	Neural Network (Specific Model)	11	0.912	40874	358.997	2777004	0.47	2356	None	82	2777004	0	33865.9	40874	20605	138358	2358	47.19
BV28.bin.56	55.6	0.91	Neural Network (Specific Model)	11	0.898	3926	289.573	1395561	0.46	1445	None	371	1395561	0	3761.62	3926	2303	16043	2000	45.89
BV28.bin.57	71.63	0.97	Neural Network (Specific Model)	11	0.916	9120	323.384	1753692	0.43	1659	None	241	1753692	0	7276.73	9120	3643	35480	2004	43.01
BV28.bin.61	81.97	1.17	Gradient Boost (General Model)	11	0.89	7347	297.49	1681848	0.56	1681	None	280	1681848	0	6006.6	7347	2859	41451	2014	56.39
BV28.bin.67	76.05	0.39	Gradient Boost (General Model)	11	0.91	23462	330.797	1633895	0.46	1501	None	84	1633895	0	19451.1	23462	11767	77551	2116	45.55
BV28.bin.68	93.87	3.26	Gradient Boost (General Model)	11	0.931	19919	345.694	2464026	0.5	2216	None	175	2464026	0	14080.1	19919	6962	56272	2088	50.22
BV28.bin.69	99.79	0.29	Neural Network (Specific Model)	11	0.938	54063	374.455	2194224	0.54	1837	None	74	2194224	0	29651.7	54063	14192	120466	2193	54.05
BV28.bin.70	79.92	4.76	Gradient Boost (General Model)	11	0.865	17919	299.405	3195805	0.6	3083	None	275	3195805	0	11621.1	17919	5288	54308	2015	59.61
BV28.bin.71	58.49	0.82	Gradient Boost (General Model)	11	0.917	3979	280.256	1329779	0.48	1454	None	348	1329779	0	3821.2	3979	2324	14986	2000	48.11
BV28.bin.72	81.55	1.06	Neural Network (Specific Model)	11	0.906	13892	323.412	3043165	0.44	2848	None	331	3043165	0	9193.85	13892	4139	42003	2002	43.56
BV28.bin.79	95.08	0.15	Gradient Boost (General Model)	11	0.867	15873	298.775	2485814	0.47	2408	None	209	2485814	0	11893.9	15873	5545	70766	2138	47.35
BV28.bin.9	88.32	0.47	Gradient Boost (General Model)	11	0.94	14102	355.564	1770525	0.53	1563	None	174	1770525	0	10175.4	14102	4629	53176	2012	52.78
BV28.bin.90	59.65	0.38	Neural Network (Specific Model)	11	0.894	4394	321.057	1399606	0.61	1302	None	336	1399606	0	4165.49	4394	2443	19896	2009	61.05
BV28.bin.93	90.71	0.1	Neural Network (Specific Model)	11	0.872	28324	308.744	2541997	0.44	2398	None	183	2541997	0	13890.7	28324	5202	88830	2046	44.06
BV3.bin.10	90.66	0.59	Neural Network (Specific Model)	11	0.902	23715	351.58	2047374	0.47	1752	None	125	2047374	0	16379	23715	8520	90374	2042	46.63
BV3.bin.101	55.73	0.31	Neural Network (Specific Model)	11	0.924	56078	329.401	1686369	0.42	1579	None	42	1686369	0	40151.6	56078	22146	114638	2153	42.3
BV3.bin.105	89.03	0.04	Neural Network (Specific Model)	11	0.871	39706	337.174	2481820	0.55	2140	None	108	2481820	0	22979.8	39706	11024	83578	2599	54.97
BV3.bin.106	83.6	1.55	Gradient Boost (General Model)	11	0.905	41564	330.904	2485850	0.51	2270	None	110	2485850	0	22598.6	41564	11623	100274	2028	51.31
BV3.bin.115	74.99	0.02	Gradient Boost (General Model)	11	0.902	143423	352.581	1559133	0.45	1331	None	22	1559133	0	70869.7	143423	40175	373519	2061	45.29
BV3.bin.117	53.38	0.27	Gradient Boost (General Model)	11	0.896	4309	293.674	1361119	0.5	1387	None	344	1361119	0	3956.74	4309	2365	24465	2003	49.52
BV3.bin.118	96.38	0.32	Gradient Boost (General Model)	11	0.844	15997	294.694	2505373	0.52	2399	None	225	2505373	0	11135	15997	4751	74064	2084	52.27
BV3.bin.119	78.16	3.5	Neural Network (Specific Model)	11	0.917	6923	320.275	1919075	0.5	1834	None	347	1919075	0	5530.48	6923	2904	32515	2001	50.37
BV3.bin.12	92.24	0.24	Neural Network (Specific Model)	11	0.915	54789	331.871	2385777	0.43	2196	None	67	2385777	0	35608.6	54789	19094	143201	2026	42.75
BV3.bin.122	91.17	0.01	Neural Network (Specific Model)	11	0.9	89409	360.554	2627527	0.49	2189	None	34	2627527	0	77280.2	89409	42928	410810	11277	49.32
BV3.bin.123	78.35	0.46	Neural Network (Specific Model)	11	0.903	62490	362.95	2395585	0.47	1990	None	65	2395585	0	36855.2	62490	20162	187103	2013	46.71
BV3.bin.124	84.27	3.86	Neural Network (Specific Model)	11	0.879	31177	297.767	2904058	0.6	2861	None	166	2904058	0	17494.3	31177	8065	121435	2056	59.69
BV3.bin.125	85.03	1.48	Neural Network (Specific Model)	11	0.925	81323	368.058	2335401	0.46	1959	None	46	2335401	0	50769.6	81323	25606	155794	2462	46.38
BV3.bin.126	98	0.08	Neural Network (Specific Model)	11	0.921	71631	360.007	2068751	0.53	1766	None	46	2068751	0	44972.8	71631	22339	195947	4569	53.31
BV3.bin.130	77.99	4.16	Gradient Boost (General Model)	11	0.894	7051	280.889	1314329	0.41	1396	None	234	1314329	0	5616.79	7051	2629	30350	2017	40.89
BV3.bin.132	74	3.3	Neural Network (Specific Model)	11	0.904	6387	304.356	1643504	0.51	1630	None	295	1643504	0	5571.2	6387	3101	20610	2067	50.85
BV3.bin.133	58.43	0.58	Neural Network (Specific Model)	11	0.898	7125	316.328	1398912	0.48	1325	None	234	1398912	0	5978.26	7125	3135	21575	2028	48.02
BV3.bin.24	85.85	0	Neural Network (Specific Model)	11	0.92	86380	343.802	2804742	0.48	2505	None	47	2804742	0	59675.4	86380	34849	263086	2141	48.34
BV3.bin.25	60.35	0.08	Neural Network (Specific Model)	11	0.903	29017	317.158	1781809	0.46	1694	None	89	1781809	0	20020.3	29017	10446	103964	2186	46.16
BV3.bin.30	98.63	0.02	Neural Network (Specific Model)	11	0.922	59896	343.756	2482332	0.48	2224	None	61	2482332	0	40694	59896	22929	200371	2598	48.04
BV3.bin.33	88.83	0.07	Neural Network (Specific Model)	11	0.9	39273	318.416	2469885	0.51	2332	None	95	2469885	0	25998.8	39273	13744	149871	2172	51.26
BV3.bin.41	61.06	0.02	Neural Network (Specific Model)	11	0.895	5369	272.398	904452	0.45	993	None	191	904452	0	4735.35	5369	2651	14715	2003	45.13
BV3.bin.45	59.22	1.1	Neural Network (Specific Model)	11	0.878	41697	331.63	1474596	0.44	1303	None	66	1474596	0	22342.4	41697	12370	119442	2048	44.05
BV3.bin.47	80.7	3.3	Gradient Boost (General Model)	11	0.871	4556	277.093	2173564	0.5	2283	None	514	2173564	0	4228.72	4556	2468	16611	2000	50.3
BV3.bin.50	79.61	1.9	Neural Network (Specific Model)	11	0.895	11676	315.711	1549721	0.57	1466	None	181	1549721	0	8561.99	11676	3930	45603	2022	57.11
BV3.bin.56	81.22	0.75	Neural Network (Specific Model)	11	0.901	53796	368.774	2194091	0.51	1789	None	58	2194091	0	37829.2	53796	19545	141953	2265	51.05
BV3.bin.58	94.68	1.61	Gradient Boost (General Model)	11	0.913	26721	323.69	1450393	0.63	1366	None	96	1450393	0	15108.3	26721	7551	73810	2077	63.2
BV3.bin.60	72.3	0.02	Neural Network (Specific Model)	11	0.92	19539	331.631	1776948	0.39	1646	None	122	1776948	0	14565.1	19539	7341	67146	2175	38.7
BV3.bin.64	95.77	0.08	Neural Network (Specific Model)	11	0.913	62761	359.976	2818188	0.51	2387	None	71	2818188	0	39692.8	62761	19151	230111	2586	51.12
BV3.bin.65	81.76	3.99	Neural Network (Specific Model)	11	0.87	7545	288.71	2201723	0.48	2214	None	363	2201723	0	6065.35	7545	3056	29814	2042	48.45
BV3.bin.72	93.23	1.69	Gradient Boost (General Model)	11	0.862	17739	288.444	3539654	0.53	3535	None	328	3539654	0	10791.6	17739	4562	70666	2003	53.15
BV3.bin.73	95.04	0.18	Gradient Boost (General Model)	11	0.924	33783	338.463	1950097	0.46	1778	None	76	1950097	0	25659.2	33783	12902	109263	2033	46.47
BV3.bin.76	81.85	1.35	Gradient Boost (General Model)	11	0.89	9705	299.354	1602930	0.56	1592	None	213	1602930	0	7525.49	9705	3774	49021	2053	56.46
BV3.bin.77	58.84	1.21	Gradient Boost (General Model)	11	0.863	3820	259.949	1560027	0.59	1733	None	427	1560027	0	3653.46	3820	2308	13696	2001	58.89
BV3.bin.8	99.07	0.06	Gradient Boost (General Model)	11	0.916	700883	373.034	1616298	0.52	1325	None	4	1616298	0	404074	700883	700883	781199	26317	52.28
BV3.bin.82	68.97	0.69	Neural Network (Specific Model)	11	0.912	7615	328.735	1654271	0.53	1531	None	255	1654271	0	6487.34	7615	3551	34890	2019	52.59
BV3.bin.85	77.15	0.91	Neural Network (Specific Model)	11	0.913	13422	334.702	2330943	0.46	2123	None	249	2330943	0	9361.22	13422	4037	69268	2013	45.61
BV3.bin.95	89.04	0.55	Gradient Boost (General Model)	11	0.89	53733	330.923	2194666	0.45	1969	None	73	2194666	0	30063.9	53733	18794	133440	2001	45.09
BV3.bin.96	95.68	2.8	Gradient Boost (General Model)	11	0.872	93996	325.894	4358239	0.49	3891	None	72	4358239	0	60531.1	93996	32605	204960	2457	49.09
BV4.bin.1	68.04	0.05	Neural Network (Specific Model)	11	0.894	78434	374.534	1660041	0.52	1323	None	36	1660041	0	46112.2	78434	21248	154444	2031	51.8
BV4.bin.113	98.1	0.37	Gradient Boost (General Model)	11	0.907	21833	343.917	2315952	0.49	2040	None	138	2315952	0	16782.3	21833	9597	112286	2135	49.48
BV4.bin.117	73.92	0.07	Neural Network (Specific Model)	11	0.877	32201	324.324	1733518	0.53	1565	None	78	1733518	0	22224.6	32201	10907	101775	2025	53.42
BV4.bin.123	67.23	0.32	Neural Network (Specific Model)	11	0.902	5704	290.641	1306879	0.49	1354	None	270	1306879	0	4840.29	5704	2641	21497	2007	49.17
BV4.bin.126	64.53	0.71	Neural Network (Specific Model)	11	0.906	12611	344.958	1731797	0.45	1518	None	190	1731797	0	9114.72	12611	4091	52608	2005	45.16
BV4.bin.138	95.04	4.39	Gradient Boost (General Model)	11	0.931	26661	356.673	1802971	0.63	1570	None	110	1802971	0	16390.6	26661	8784	167193	2011	63.3
BV4.bin.140	75.68	0.24	Neural Network (Specific Model)	11	0.923	164535	361.554	1720857	0.56	1467	None	20	1720857	0	86042.9	164535	38134	213686	12424	56.22
BV4.bin.143	93.61	0.35	Gradient Boost (General Model)	11	0.867	26993	330.935	2099247	0.41	1836	None	120	2099247	0	17493.7	26993	8952	83594	2082	40.78
BV4.bin.147	72.01	0.21	Neural Network (Specific Model)	11	0.91	40700	355.895	1789627	0.5	1528	None	64	1789627	0	27962.9	40700	15956	162124	4169	49.66
BV4.bin.148	58.56	0.12	Neural Network (Specific Model)	11	0.904	42642	328.124	1459597	0.53	1343	None	57	1459597	0	25607	42642	10896	101706	2380	52.62
BV4.bin.153	79.43	0.2	Neural Network (Specific Model)	11	0.903	14498	352.175	2305567	0.51	1973	None	213	2305567	0	10824.3	14498	5543	67881	2039	51.4
BV4.bin.160	95.54	2.56	Gradient Boost (General Model)	11	0.876	11833	292.239	2251811	0.47	2253	None	268	2251811	0	8402.28	11833	3664	47815	2030	46.63
BV4.bin.161	78.42	0.72	Neural Network (Specific Model)	11	0.913	30533	340.7	1677039	0.55	1500	None	81	1677039	0	20704.2	30533	9720	91599	2586	54.69
BV4.bin.164	80.95	4.86	Gradient Boost (General Model)	11	0.905	7380	298.679	1372236	0.55	1388	None	226	1372236	0	6071.84	7380	3154	30754	2000	54.98
BV4.bin.2	82.36	2.68	Neural Network (Specific Model)	11	0.927	8576	322.215	2003875	0.54	1925	None	280	2003875	0	7156.7	8576	3597	62894	2003	53.73
BV4.bin.24	91.28	0.83	Gradient Boost (General Model)	11	0.917	51330	334.325	2286558	0.51	2095	None	61	2286558	0	37484.6	51330	21117	132324	2147	51.26
BV4.bin.27	58.29	1.61	Neural Network (Specific Model)	11	0.905	3874	289.926	1416948	0.48	1478	None	380	1416948	0	3728.81	3874	2344	11671	2017	47.93
BV4.bin.31	59.43	1.73	Gradient Boost (General Model)	11	0.84	5605	295.55	1174758	0.42	1115	None	234	1174758	0	5020.33	5605	2606	23306	2022	41.54
BV4.bin.35	73.67	0.27	Neural Network (Specific Model)	11	0.882	165235	305.019	1365823	0.5	1320	None	15	1365823	0	91054.9	165235	36432	217037	22270	50.46
BV4.bin.37	65.1	0.23	Gradient Boost (General Model)	11	0.914	7833	296.009	1461564	0.48	1508	None	247	1461564	0	5917.26	7833	2835	31098	2001	47.99
BV4.bin.39	75.7	3.66	Gradient Boost (General Model)	11	0.898	5663	282.243	1994333	0.57	2120	None	410	1994333	0	4864.23	5663	2772	22288	2021	57.17
BV4.bin.41	82.18	1.06	Neural Network (Specific Model)	11	0.917	16976	347.812	2465718	0.46	2169	None	226	2465718	0	10910.3	16976	5017	44652	2000	45.98
BV4.bin.44	82.31	4.75	Neural Network (Specific Model)	11	0.905	17210	325.836	1805915	0.47	1674	None	176	1805915	0	10260.9	17210	4341	48670	2018	46.83
BV4.bin.47	66.21	0.07	Gradient Boost (General Model)	11	0.886	44236	314.178	1453302	0.55	1368	None	67	1453302	0	21691.1	44236	11043	109048	2027	54.6
BV4.bin.5	78.75	0.03	Neural Network (Specific Model)	11	0.893	46359	347.689	2235641	0.42	1917	None	68	2235641	0	32877.1	46359	17220	89719	2045	41.98
BV4.bin.55	75.29	4.2	Gradient Boost (General Model)	11	0.902	11702	312.63	1849546	0.45	1780	None	214	1849546	0	8642.74	11702	4031	46321	2063	44.78
BV4.bin.58	93.68	1.5	Gradient Boost (General Model)	11	0.935	10452	336.301	1465232	0.53	1360	None	187	1465232	0	7835.47	10452	4006	38587	2023	53.35
BV4.bin.64	90.75	1	Gradient Boost (General Model)	11	0.901	13313	320.299	1895236	0.43	1780	None	221	1895236	0	8575.73	13313	3639	56538	2002	43.07
BV4.bin.65	98.58	0.32	Gradient Boost (General Model)	11	0.94	21676	368.426	1775606	0.57	1513	None	123	1775606	0	14435.8	21676	6346	78259	2068	57.34
BV4.bin.69	63.99	2.73	Neural Network (Specific Model)	11	0.891	5883	285.031	1452200	0.51	1515	None	296	1452200	0	4906.08	5883	2674	19661	2004	50.7
BV4.bin.7	96.24	0.43	Gradient Boost (General Model)	11	0.896	98851	321.067	3410744	0.5	3180	None	56	3410744	0	60906.1	98851	32637	243061	3112	49.73
BV4.bin.73	87.61	4.1	Gradient Boost (General Model)	11	0.924	19105	329.779	2503134	0.49	2342	None	202	2503134	0	12391.8	19105	5050	66085	2051	48.82
BV4.bin.74	78.71	2.49	Gradient Boost (General Model)	11	0.888	23768	323.719	2213386	0.61	2026	None	147	2213386	0	15057	23768	6971	70725	2028	61.37
BV4.bin.76	98.72	1.6	Gradient Boost (General Model)	11	0.898	41193	314.285	2919640	0.43	2786	None	103	2919640	0	28346	41193	14297	171384	2225	42.69
BV4.bin.8	96.79	3.23	Gradient Boost (General Model)	11	0.877	91310	322.458	4339446	0.49	3942	None	75	4339446	0	57859.3	91310	27316	303800	2709	49.42
BV4.bin.84	75.7	1.01	Neural Network (Specific Model)	11	0.925	8684	335.018	2022400	0.53	1865	None	289	2022400	0	6997.92	8684	3383	34362	2017	53.14
BV4.bin.86	95.7	0.09	Neural Network (Specific Model)	11	0.892	38754	367.602	2436517	0.52	1973	None	94	2436517	0	25920.4	38754	12227	90781	2752	52.19
BV4.bin.87	74.91	1.02	Neural Network (Specific Model)	11	0.932	26637	365.785	2004182	0.49	1704	None	118	2004182	0	16984.6	26637	8124	56780	2080	48.95
BV4.bin.95	74.19	1.22	Neural Network (Specific Model)	11	0.903	43278	315.157	2276170	0.45	2179	None	100	2276170	0	22761.7	43278	10805	94013	2037	44.59
BV4.bin.97	82.61	1.17	Neural Network (Specific Model)	11	0.905	6543	296.638	2593663	0.48	2644	None	478	2593663	0	5426.07	6543	2826	32175	2003	47.57
BV5.bin.1	79.22	0.09	Gradient Boost (General Model)	11	0.859	10271	292.923	1924788	0.43	1885	None	255	1924788	0	7548.19	10271	3357	46356	2010	42.74
BV5.bin.100	77.55	2.85	Neural Network (Specific Model)	11	0.902	8505	325.5	2073626	0.42	1918	None	313	2073626	0	6625	8505	3155	41380	2007	42.35
BV5.bin.103	87.45	3.37	Gradient Boost (General Model)	11	0.909	9112	297.259	1825558	0.48	1864	None	262	1825558	0	6967.78	9112	3391	31262	2017	47.73
BV5.bin.104	66.85	0.43	Neural Network (Specific Model)	11	0.911	16745	331.177	1385053	0.42	1272	None	151	1385053	0	9172.54	16745	3467	69164	2008	42.08
BV5.bin.105	93.16	0.06	Gradient Boost (General Model)	11	0.881	33859	371.092	986871	0.49	782	None	36	986871	0	27413.1	33859	18284	69438	2296	48.77
BV5.bin.110	96.34	2.07	Gradient Boost (General Model)	11	0.89	14782	313.904	1745851	0.56	1653	None	161	1745851	0	10843.8	14782	4998	61380	2060	56.22
BV5.bin.112	86.71	1.86	Gradient Boost (General Model)	11	0.925	7537	338.735	2045912	0.56	1865	None	327	2045912	0	6256.61	7537	3381	26025	2009	55.87
BV5.bin.115	82.52	0.54	Gradient Boost (General Model)	11	0.911	5814	292.737	2013067	0.48	2093	None	402	2013067	0	5007.63	5814	2689	37214	2020	47.89
BV5.bin.12	84.22	0.17	Neural Network (Specific Model)	11	0.877	46576	314.785	2132460	0.48	1983	None	74	2132460	0	28817	46576	13619	108549	2208	47.65
BV5.bin.126	97.04	3.42	Gradient Boost (General Model)	11	0.871	11958	301.249	2707336	0.46	2614	None	331	2707336	0	8179.26	11958	3416	59426	2015	45.89
BV5.bin.20	90.48	0.1	Neural Network (Specific Model)	11	0.919	32207	345.49	2050833	0.56	1822	None	95	2050833	0	21587.7	32207	11623	103603	2260	56.32
BV5.bin.30	60.39	1.27	Gradient Boost (General Model)	11	0.913	4476	295.645	1080331	0.49	1114	None	259	1080331	0	4171.16	4476	2483	15982	2005	48.93
BV5.bin.34	71.57	0.1	Neural Network (Specific Model)	11	0.906	37524	322.233	1141306	0.51	1072	None	47	1141306	0	24283.1	37524	11875	102430	3069	50.84
BV5.bin.38	70.52	1.38	Gradient Boost (General Model)	11	0.916	5966	291.662	1252382	0.41	1313	None	242	1252382	0	5175.13	5966	2567	25195	2012	41.23
BV5.bin.4	99.14	3.74	Gradient Boost (General Model)	11	0.898	77464	328.128	3228428	0.5	2951	None	60	3228428	0	53807.1	77464	26446	268410	3235	50.33
BV5.bin.41	77.17	1.52	Neural Network (Specific Model)	11	0.912	12098	342.695	1928330	0.56	1712	None	198	1928330	0	9739.04	12098	4851	48995	2006	55.56
BV5.bin.48	82.28	1.65	Gradient Boost (General Model)	11	0.889	16047	307.47	2343174	0.57	2264	None	200	2343174	0	11715.9	16047	6050	64426	2007	56.73
BV5.bin.5	63.15	0.18	Neural Network (Specific Model)	11	0.903	4938	308.972	1524215	0.49	1487	None	339	1524215	0	4496.21	4938	2668	19590	2005	49.49
BV5.bin.53	98.98	0.06	Neural Network (Specific Model)	11	0.894	48149	315.596	1947193	0.5	1841	None	65	1947193	0	29956.8	48149	15187	164002	2171	50.3
BV5.bin.54	77.33	2.11	Neural Network (Specific Model)	11	0.917	8733	329.117	2169892	0.46	2018	None	321	2169892	0	6759.79	8733	3294	34675	2020	46.18
BV5.bin.73	76.1	1.4	Gradient Boost (General Model)	11	0.911	7895	306.503	2006250	0.46	1991	None	318	2006250	0	6308.96	7895	3131	26318	2015	46.22
BV5.bin.74	88.98	0.34	Gradient Boost (General Model)	11	0.886	13294	289.439	1842659	0.4	1884	None	231	1842659	0	7976.88	13294	3049	67782	2007	40.34
BV5.bin.77	72.46	4.37	Neural Network (Specific Model)	11	0.898	40125	371.303	3051218	0.49	2462	None	111	3051218	0	27488.5	40125	13483	163289	2090	49.22
BV5.bin.8	89.85	1.53	Neural Network (Specific Model)	11	0.917	12496	338.318	2373739	0.48	2149	None	251	2373739	0	9457.13	12496	4651	50518	2029	47.86
BV5.bin.83	84.55	2.06	Neural Network (Specific Model)	11	0.913	35230	331.173	1407685	0.53	1296	None	74	1407685	0	19022.8	35230	8719	159437	2207	52.82
BV5.bin.84	64.31	1.8	Gradient Boost (General Model)	11	0.924	9633	323.321	1500254	0.49	1431	None	201	1500254	0	7463.95	9633	3612	33097	2035	49.15
BV5.bin.85	62.47	0.82	Neural Network (Specific Model)	11	0.913	70739	318.898	1227287	0.57	1173	None	29	1227287	0	42320.2	70739	26094	202478	2404	56.81
BV5.bin.86	99.23	0.24	Gradient Boost (General Model)	11	0.919	31038	313.118	1699770	0.6	1665	None	68	1699770	0	24996.6	31038	13121	194289	2409	59.76
BV5.bin.88	82.92	0.73	Neural Network (Specific Model)	11	0.93	22436	351.938	2408706	0.55	2125	None	146	2408706	0	16498	22436	8608	58092	2280	54.97
BV5.bin.89	59.1	0.96	Neural Network (Specific Model)	11	0.866	9437	308.868	1686959	0.49	1580	None	233	1686959	0	7240.17	9437	3776	26929	2015	48.65
BV5.bin.9	59.42	0.02	Gradient Boost (General Model)	11	0.861	4924	263.386	466358	0.39	510	None	105	466358	0	4441.5	4924	2499	13189	2027	39.45
BV5.bin.92	85.83	1.72	Neural Network (Specific Model)	11	0.879	28900	320.003	3934191	0.5	3606	None	204	3934191	0	19285.2	28900	9584	114676	2030	49.94
BV5.bin.95	58.11	0.1	Gradient Boost (General Model)	11	0.902	55461	325.53	1220339	0.53	1129	None	32	1220339	0	38135.6	55461	25085	112981	2059	53.2
BV5.bin.98	82.54	0.84	Neural Network (Specific Model)	11	0.884	13035	336.941	1985819	0.48	1739	None	203	1985819	0	9782.36	13035	4848	51677	2010	48.29
BV6.H.bin.1	89.14	1.56	Gradient Boost (General Model)	11	0.908	16260	323.168	2134300	0.46	2002	None	180	2134300	0	11857.2	16260	5898	79521	2103	46.06
BV6.H.bin.10	84.43	0.96	Neural Network (Specific Model)	11	0.914	22269	344.015	1973664	0.54	1752	None	122	1973664	0	16177.6	22269	8189	69749	2058	53.91
BV6.H.bin.11	52.08	0.1	Neural Network (Specific Model)	11	0.92	62989	358.14	1503309	0.47	1290	None	59	1503309	0	25479.8	62989	11644	121009	2030	46.73
BV6.H.bin.12	83.21	4.41	Gradient Boost (General Model)	11	0.934	8847	301.219	1607131	0.46	1663	None	244	1607131	0	6586.6	8847	3083	30135	2047	45.53
BV6.H.bin.14	85.58	0.52	Neural Network (Specific Model)	11	0.883	20719	298.886	1579696	0.45	1559	None	110	1579696	0	14360.9	20719	6611	83969	2032	44.58
BV6.H.bin.15	71.25	0.3	Neural Network (Specific Model)	11	0.912	6333	311.705	1737535	0.48	1698	None	319	1737535	0	5446.82	6333	2995	28047	2018	47.79
BV6.H.bin.19	89.96	0.39	Neural Network (Specific Model)	11	0.898	65922	339.025	2476894	0.43	2190	None	50	2476894	0	49537.9	65922	29367	175408	2056	42.93
BV6.H.bin.2	67.21	2.23	Neural Network (Specific Model)	11	0.92	5200	292.967	1238040	0.62	1297	None	270	1238040	0	4585.33	5200	2491	17681	2015	62.04
BV6.H.bin.21	83.26	1.09	Gradient Boost (General Model)	11	0.927	11107	306.926	1506291	0.57	1519	None	188	1506291	0	8012.19	11107	3646	62983	2014	56.93
BV6.H.bin.3	87.62	2.23	Neural Network (Specific Model)	11	0.901	93053	334.009	3099058	0.49	2790	None	53	3099058	0	58472.8	93053	40413	285852	2181	48.7
BV6.H.bin.37	90.2	0	Neural Network (Specific Model)	11	0.904	23159	316.01	2311029	0.52	2208	None	153	2311029	0	15104.8	23159	6889	68935	2146	51.82
BV6.H.bin.44	92.08	0.44	Neural Network (Specific Model)	11	0.911	27769	330.562	2662191	0.48	2450	None	145	2662191	0	18359.9	27769	9456	77158	2035	47.74
BV6.H.bin.47	83.25	1.27	Neural Network (Specific Model)	11	0.899	47086	337.727	2578799	0.45	2293	None	82	2578799	0	31448.8	47086	16015	112125	2003	45.4
BV6.H.bin.48	60.78	0.97	Gradient Boost (General Model)	11	0.919	5278	283.288	1046459	0.64	1133	None	220	1046459	0	4756.63	5278	2715	25108	2039	63.61
BV6.H.bin.59	99.16	2.11	Neural Network (Specific Model)	11	0.892	25687	357.899	2564747	0.52	2134	None	133	2564747	0	19283.8	25687	9953	94267	2247	52.06
BV6.H.bin.63	86.75	1.58	Gradient Boost (General Model)	11	0.895	28762	333.144	2008236	0.45	1800	None	113	2008236	0	17772	28762	9035	54297	2143	45.48
BV6.H.bin.69	92.85	0	Gradient Boost (General Model)	11	0.889	62737	343.654	2985420	0.41	2577	None	68	2985420	0	43903.2	62737	26226	129018	2488	41.4
BV6.H.bin.7	99.12	1.49	Gradient Boost (General Model)	11	0.873	94089	329.859	4377705	0.49	3867	None	76	4377705	0	57601.4	94089	31819	227839	2214	49.2
BV6.H.bin.72	78.46	0.14	Gradient Boost (General Model)	11	0.906	11866	340.484	2035048	0.45	1807	None	244	2035048	0	8340.36	11866	3828	62298	2010	44.57
BV6.H.bin.83	86.27	2.71	Neural Network (Specific Model)	11	0.889	9269	338.106	1923705	0.61	1689	None	267	1923705	0	7204.89	9269	3557	28521	2017	60.76
BV6.H.bin.84	66.27	1.7	Gradient Boost (General Model)	11	0.919	5707	287.107	1447387	0.48	1548	None	290	1447387	0	4990.99	5707	2590	22945	2000	48.05
BV6.H.bin.87	75.6	1.79	Neural Network (Specific Model)	11	0.84	6931	278.672	1961318	0.53	1973	None	333	1961318	0	5889.84	6931	3087	32635	2025	53.33
BV6.H.bin.89	99.94	2.13	Gradient Boost (General Model)	11	0.856	27816	317.204	3151187	0.46	2838	None	192	3151187	0	16412.4	27816	8471	116443	2021	45.54
BV6.H.bin.91	84.56	0.38	Neural Network (Specific Model)	11	0.891	108442	329.402	2329006	0.66	2103	None	34	2329006	0	68500.2	108442	37587	178254	7240	65.77
BV6.H.bin.93	87.01	3.71	Neural Network (Specific Model)	11	0.872	27532	290.743	2861965	0.45	2865	None	163	2861965	0	17558.1	27532	7664	116900	2023	44.82
BV7.H.bin.108	76.16	2.91	Gradient Boost (General Model)	11	0.904	6444	299.019	1213974	0.57	1225	None	229	1213974	0	5301.2	6444	2765	17902	2010	57.35
BV7.H.bin.109	99.88	0.93	Neural Network (Specific Model)	11	0.885	44681	329.991	2579740	0.65	2311	None	99	2579740	0	26058	44681	12415	132375	2030	65.5
BV7.H.bin.123	83.04	0.52	Neural Network (Specific Model)	11	0.93	10410	347.251	2069472	0.55	1850	None	261	2069472	0	7929.01	10410	4039	34078	2069	54.78
BV7.H.bin.124	94.01	1.96	Gradient Boost (General Model)	11	0.92	23956	323.302	1479664	0.63	1406	None	99	1479664	0	14946.1	23956	6611	82100	2067	62.6
BV7.H.bin.14	86.75	0.01	Neural Network (Specific Model)	11	0.897	42829	343.901	2674174	0.42	2330	None	102	2674174	0	26217.4	42829	12621	104713	2187	41.84
BV7.H.bin.16	88.87	0.26	Neural Network (Specific Model)	11	0.902	33175	324.444	2207238	0.52	2050	None	91	2207238	0	24255.4	33175	11836	117350	3028	51.87
BV7.H.bin.22	86.15	1.75	Neural Network (Specific Model)	11	0.887	8124	291.575	2361398	0.53	2400	None	366	2361398	0	6451.91	8124	3094	30815	2009	53.19
BV7.H.bin.24	53.39	0.05	Neural Network (Specific Model)	11	0.903	26090	338.58	1298772	0.5	1157	None	66	1298772	0	19678.4	26090	11255	68848	2321	50.37
BV7.H.bin.28	75.84	0.06	Neural Network (Specific Model)	11	0.903	56488	347.657	1712232	0.47	1484	None	44	1712232	0	38914.4	56488	21251	121524	7263	46.94
BV7.H.bin.29	54.47	0.54	Neural Network (Specific Model)	11	0.882	21337	311.908	955000	0.42	901	None	66	955000	0	14469.7	21337	7276	75138	2050	42.17
BV7.H.bin.31	85.17	0.37	Neural Network (Specific Model)	11	0.909	32999	345	1999350	0.54	1760	None	82	1999350	0	24382.3	32999	11053	77478	4029	53.95
BV7.H.bin.35	53.29	0.59	Neural Network (Specific Model)	11	0.893	4435	275.755	972473	0.45	1052	None	234	972473	0	4155.87	4435	2483	18653	2000	44.96
BV7.H.bin.36	88.31	0.11	Neural Network (Specific Model)	11	0.874	23676	327.005	2389148	0.55	2131	None	139	2389148	0	17188.1	23676	8485	101250	2135	55.28
BV7.H.bin.5	84.01	2.58	Neural Network (Specific Model)	11	0.914	12241	345.403	2086676	0.5	1843	None	226	2086676	0	9233.08	12241	4763	35093	2043	50.1
BV7.H.bin.52	83.84	1.83	Neural Network (Specific Model)	11	0.911	9191	327.549	1836665	0.47	1704	None	278	1836665	0	6606.71	9191	3028	34331	2005	46.77
BV7.H.bin.54	85.25	0	Neural Network (Specific Model)	11	0.906	85437	335.423	1854919	0.45	1672	None	41	1854919	0	45241.9	85437	23052	287441	2272	44.73
BV7.H.bin.56	86.15	1.1	Neural Network (Specific Model)	11	0.894	21703	306.058	2603928	0.58	2539	None	163	2603928	0	15975	21703	8152	81575	2004	57.77
BV7.H.bin.61	95.98	2.41	Neural Network (Specific Model)	11	0.881	109458	298.421	2396010	0.5	2362	None	49	2396010	0	48898.2	109458	28636	311259	2239	49.57
BV7.H.bin.62	82.99	2.08	Neural Network (Specific Model)	11	0.904	52198	331.792	3039090	0.49	2763	None	98	3039090	0	31011.1	52198	15775	102607	2315	49.02
BV7.H.bin.64	94.56	0.52	Neural Network (Specific Model)	11	0.88	31336	321.686	2301522	0.48	2102	None	95	2301522	0	24226.5	31336	13186	88911	2138	47.94
BV7.H.bin.7	75.48	2.35	Gradient Boost (General Model)	11	0.918	6602	308.604	2171741	0.47	2157	None	388	2171741	0	5597.27	6602	2688	39667	2005	46.85
BV7.H.bin.77	63.78	0.04	Neural Network (Specific Model)	11	0.91	20003	350.782	1931786	0.45	1672	None	148	1931786	0	13052.6	20003	5325	80119	2017	44.86
BV7.H.bin.8	69.53	2.77	Neural Network (Specific Model)	11	0.898	21224	331.18	2658688	0.5	2408	None	218	2658688	0	12195.8	21224	5231	60555	2016	49.66
BV7.H.bin.9	77.61	1.15	Gradient Boost (General Model)	11	0.897	4829	275.125	1284338	0.57	1398	None	280	1284338	0	4586.92	4829	2751	21770	2011	57.06
BV7.H.bin.93	98.72	0.64	Gradient Boost (General Model)	11	0.921	21138	304.788	1651979	0.6	1666	None	112	1651979	0	14749.8	21138	6598	85165	2037	59.92
BV7.H.bin.97	95.49	0	Neural Network (Specific Model)	11	0.914	61445	368.09	2716903	0.47	2252	None	64	2716903	0	42451.6	61445	21592	177115	2384	46.94
BV8.H.bin.104	78.63	3.14	Gradient Boost (General Model)	11	0.89	6555	304.193	2915218	0.52	2849	None	524	2915218	0	5563.39	6555	2889	29155	2007	51.65
BV8.H.bin.109	78.8	0.18	Neural Network (Specific Model)	11	0.915	42704	350.302	1642377	0.47	1432	None	55	1642377	0	29861.4	42704	14435	87437	4136	46.91
BV8.H.bin.111	95.82	0.95	Gradient Boost (General Model)	11	0.9	100509	333.647	2583220	0.45	2327	None	38	2583220	0	67979.5	100509	40295	284475	2539	45.2
BV8.H.bin.113	93.47	0.92	Neural Network (Specific Model)	11	0.913	19351	353.618	2795445	0.47	2410	None	247	2795445	0	11317.6	19351	4642	83863	2073	47.26
BV8.H.bin.116	83.72	0.1	Neural Network (Specific Model)	11	0.896	60423	313.644	682503	0.49	651	None	17	682503	0	40147.2	60423	23524	88427	4764	49.31
BV8.H.bin.14	94.11	0.14	Gradient Boost (General Model)	11	0.896	89050	316.654	1834165	0.52	1732	None	28	1834165	0	65505.9	89050	41585	198360	4784	51.9
BV8.H.bin.16	84.89	2.9	Gradient Boost (General Model)	11	0.894	9263	307.869	1625973	0.57	1577	None	225	1625973	0	7226.55	9263	3895	24715	2021	56.59
BV8.H.bin.21	80.91	4.74	Neural Network (Specific Model)	11	0.917	23251	336.069	2718307	0.49	2476	None	175	2718307	0	15533.2	23251	6996	156187	2105	49.39
BV8.H.bin.24	88.29	1.46	Neural Network (Specific Model)	11	0.9	23185	342.637	1904529	0.47	1670	None	135	1904529	0	14107.6	23185	6725	68703	2094	46.75
BV8.H.bin.27	77.17	1.97	Neural Network (Specific Model)	11	0.907	10238	294.503	2038608	0.59	2096	None	265	2038608	0	7692.86	10238	3600	35233	2032	58.68
BV8.H.bin.28	64.71	0.17	Neural Network (Specific Model)	11	0.931	5902	328.652	1659555	0.54	1570	None	314	1659555	0	5285.21	5902	3008	21166	2018	54.06
BV8.H.bin.30	81.82	1.53	Neural Network (Specific Model)	11	0.919	37752	334.082	2315656	0.52	2127	None	102	2315656	0	22702.5	37752	10875	163398	2432	51.67
BV8.H.bin.34	82.14	3.09	Neural Network (Specific Model)	11	0.879	7776	284.472	2734663	0.48	2820	None	431	2734663	0	6344.93	7776	3296	27034	2007	48.22
BV8.H.bin.38	84.31	3.93	Gradient Boost (General Model)	11	0.896	6449	324.339	1912488	0.57	1763	None	350	1912488	0	5464.25	6449	2856	23911	2014	56.7
BV8.H.bin.41	66.75	0.08	Neural Network (Specific Model)	11	0.91	4929	287.275	1252735	0.54	1324	None	280	1252735	0	4474.05	4929	2520	19011	2009	54.15
BV8.H.bin.46	62.35	1.03	Neural Network (Specific Model)	11	0.948	4806	310.942	1109302	0.54	1130	None	254	1109302	0	4367.33	4806	2665	20942	2007	54.15
BV8.H.bin.50	90.41	4.42	Gradient Boost (General Model)	11	0.864	18361	306.709	2491624	0.53	2344	None	202	2491624	0	12334.8	18361	5883	92837	2024	53.22
BV8.H.bin.56	72.13	3.33	Neural Network (Specific Model)	11	0.92	6649	325.016	1933380	0.47	1827	None	341	1933380	0	5669.74	6649	2945	24618	2033	46.53
BV8.H.bin.60	72.58	2.16	Neural Network (Specific Model)	11	0.914	26709	334.694	2599841	0.44	2372	None	143	2599841	0	18180.7	26709	10784	68807	2036	44.16
BV8.H.bin.64	77.38	4.98	Gradient Boost (General Model)	11	0.892	13511	293.527	1745551	0.53	1770	None	186	1745551	0	9384.68	13511	4010	36835	2015	52.54
BV8.H.bin.66	92.73	0.05	Neural Network (Specific Model)	11	0.9	132521	331.171	2524944	0.42	2292	None	30	2524944	0	84164.8	132521	61116	204615	2245	41.73
BV8.H.bin.68	88.29	2.4	Neural Network (Specific Model)	11	0.928	12672	331.795	1867458	0.57	1744	None	207	1867458	0	9021.54	12672	4194	58195	2026	57.13
BV8.H.bin.76	86.53	1.03	Neural Network (Specific Model)	11	0.924	31106	347.801	2531086	0.49	2245	None	127	2531086	0	19929.8	31106	10511	80376	2014	49.1
BV8.H.bin.81	88.56	0.13	Neural Network (Specific Model)	11	0.911	24047	339.451	2141503	0.5	1919	None	136	2141503	0	15746.4	24047	7536	80796	2375	49.78
BV8.H.bin.83	72.89	1.52	Gradient Boost (General Model)	11	0.911	6090	295.115	1479914	0.58	1525	None	282	1479914	0	5247.92	6090	2918	16189	2013	57.57
BV8.H.bin.85	97.48	0.17	Neural Network (Specific Model)	11	0.889	42004	357.748	2697083	0.5	2238	None	91	2697083	0	29638.3	42004	15496	154128	2882	49.77
BV8.H.bin.93	82.03	4.45	Gradient Boost (General Model)	11	0.914	14785	317.557	2240327	0.49	2152	None	226	2240327	0	9912.95	14785	4742	54047	2048	49.49
BV8.H.bin.99	73.23	1.61	Neural Network (Specific Model)	11	0.895	32026	331.869	2381088	0.51	2145	None	127	2381088	0	18748.7	32026	9310	97779	2014	50.99
BV9.H.bin.10	100	0.05	Gradient Boost (General Model)	11	0.888	200642	319.468	2138347	0.51	1983	None	16	2138347	0	133647	200642	80354	431612	14841	50.94
BV9.H.bin.106	66.63	1.67	Neural Network (Specific Model)	11	0.908	67941	352.494	2544013	0.44	2189	None	94	2544013	0	27064	67941	14134	137300	2126	43.8
BV9.H.bin.108	96.87	1.45	Neural Network (Specific Model)	11	0.853	36169	309.454	2839977	0.52	2612	None	125	2839977	0	22719.8	36169	10633	123727	2428	51.68
BV9.H.bin.16	95.65	1.28	Gradient Boost (General Model)	11	0.88	18680	345.659	1510705	0.61	1283	None	117	1510705	0	12912	18680	6915	48502	2011	60.87
BV9.H.bin.19	97.61	0.69	Gradient Boost (General Model)	11	0.907	62918	318.393	2606624	0.39	2478	None	63	2606624	0	41375	62918	21407	162935	2026	39.07
BV9.H.bin.20	100	2.05	Gradient Boost (General Model)	11	0.896	28394	321.612	2971079	0.44	2763	None	161	2971079	0	18453.9	28394	8931	86040	2361	43.82
BV9.H.bin.23	83.48	0.44	Neural Network (Specific Model)	11	0.92	141938	335.151	2605326	0.41	2389	None	39	2605326	0	66803.2	141938	39226	456136	2132	40.97
BV9.H.bin.24	86.83	0.01	Gradient Boost (General Model)	11	0.92	61820	347.516	2280484	0.46	2016	None	62	2280484	0	36782	61820	23527	163241	2064	45.82
BV9.H.bin.28	99.06	2.07	Gradient Boost (General Model)	11	0.895	42648	301.243	2428697	0.48	2408	None	86	2428697	0	28240.7	42648	13998	146501	2271	48.16
BV9.H.bin.29	71.73	1.95	Gradient Boost (General Model)	11	0.896	12445	312.725	1932665	0.45	1848	None	229	1932665	0	8439.58	12445	3741	50182	2053	45.32
BV9.H.bin.42	88.86	0.98	Neural Network (Specific Model)	11	0.915	18651	332.074	2057777	0.5	1892	None	146	2057777	0	14094.4	18651	7383	79182	2175	50.43
BV9.H.bin.44	98.28	0.86	Gradient Boost (General Model)	11	0.901	154617	319.04	2771987	0.42	2614	None	35	2771987	0	79199.6	154617	38775	457612	2808	42.41
BV9.H.bin.45	82.62	1.27	Gradient Boost (General Model)	11	0.898	27157	322.856	2072934	0.46	1926	None	109	2072934	0	19017.7	27157	9789	75731	2050	45.91
BV9.H.bin.47	77.13	0.03	Neural Network (Specific Model)	11	0.938	9547	343.03	1510844	0.53	1379	None	198	1510844	0	7630.53	9547	3972	36233	2020	53.36
BV9.H.bin.49	83.78	4.31	Neural Network (Specific Model)	11	0.888	22653	320.15	2571221	0.65	2381	None	192	2571221	0	13391.8	22653	5950	86832	2001	65.23
BV9.H.bin.5	76.85	4.92	Neural Network (Specific Model)	11	0.904	12916	349.918	2658496	0.51	2292	None	277	2658496	0	9597.46	12916	4508	62259	2017	50.98
BV9.H.bin.50	73.27	3.68	Neural Network (Specific Model)	11	0.891	18733	307.469	1749163	0.63	1692	None	131	1749163	0	13352.4	18733	6635	61429	2042	62.89
BV9.H.bin.51	85.4	0.26	Neural Network (Specific Model)	11	0.88	39189	318	2243952	0.48	2072	None	88	2243952	0	25499.5	39189	12844	101166	2836	47.76
BV9.H.bin.52	98.59	1.31	Gradient Boost (General Model)	11	0.876	33052	311.047	2390784	0.54	2248	None	122	2390784	0	19596.6	33052	9262	75966	2064	54
BV9.H.bin.6	71.02	1.11	Neural Network (Specific Model)	11	0.913	8261	340.675	1925792	0.51	1722	None	286	1925792	0	6733.54	8261	3465	22434	2021	51.15
BV9.H.bin.61	90.65	1.07	Gradient Boost (General Model)	11	0.904	44628	322.964	2373441	0.43	2219	None	86	2373441	0	27598.2	44628	12901	167101	2080	43.48
BV9.H.bin.62	63.05	0.22	Neural Network (Specific Model)	11	0.931	11452	323.824	1328001	0.48	1276	None	142	1328001	0	9352.12	11452	4858	68552	2317	48.27
BV9.H.bin.68	87.93	2.44	Gradient Boost (General Model)	11	0.912	24640	333.388	1972035	0.49	1802	None	144	1972035	0	13694.7	24640	5400	140989	2013	49.12
BV9.H.bin.69	80.07	0.36	Neural Network (Specific Model)	11	0.927	9017	296.828	1765714	0.42	1841	None	248	1765714	0	7119.81	9017	3333	53111	2014	41.99
BV9.H.bin.7	98.14	0.08	Gradient Boost (General Model)	11	0.888	28328	323.13	1851096	0.56	1698	None	103	1851096	0	17971.8	28328	8760	71926	2167	55.89
BV9.H.bin.82	95.09	1.25	Gradient Boost (General Model)	11	0.849	53752	329.899	3263026	0.59	2803	None	97	3263026	0	33639.4	53752	15241	287979	2757	59.12
BV9.H.bin.98	60.04	1.82	Neural Network (Specific Model)	11	0.905	24658	335.473	2065126	0.49	1861	None	131	2065126	0	15764.3	24658	7293	95599	2195	49.21
BVI9.bin.102	77.84	2.03	Neural Network (Specific Model)	11	0.899	10101	303.913	2097395	0.51	2073	None	267	2097395	0	7855.41	10101	3817	46705	2005	51.23
BVI9.bin.106	88.58	2.56	Neural Network (Specific Model)	11	0.882	28942	296.769	2461771	0.53	2442	None	134	2461771	0	18371.4	28942	8902	72676	2025	53.02
BVI9.bin.110	83.38	3.36	Neural Network (Specific Model)	11	0.919	15501	322.176	1927806	0.47	1836	None	197	1927806	0	9785.82	15501	4140	96830	2001	47.44
BVI9.bin.112	82.45	0.06	Neural Network (Specific Model)	11	0.898	43012	338.265	2575818	0.52	2284	None	80	2575818	0	32197.7	43012	21885	106001	2016	52.05
BVI9.bin.114	69.15	0.74	Neural Network (Specific Model)	11	0.935	4615	301.324	1324188	0.58	1372	None	304	1324188	0	4355.88	4615	2572	18103	2014	57.84
BVI9.bin.12	80.19	4.99	Gradient Boost (General Model)	11	0.924	10893	306.391	1366842	0.61	1376	None	180	1366842	0	7593.57	10893	3356	62286	2026	61.05
BVI9.bin.121	67.15	0.13	Gradient Boost (General Model)	11	0.933	25130	346.398	1023655	0.52	921	None	62	1023655	0	16510.6	25130	7439	92528	2134	51.54
BVI9.bin.122	98.26	0.47	Gradient Boost (General Model)	11	0.91	54777	352.11	1830061	0.55	1579	None	51	1830061	0	35883.6	54777	17657	150824	2211	55.49
BVI9.bin.125	88.51	2.76	Gradient Boost (General Model)	11	0.891	23661	319.626	2593863	0.45	2414	None	154	2593863	0	16843.3	23661	8982	58381	2021	44.79
BVI9.bin.126	83.32	0.47	Neural Network (Specific Model)	11	0.89	11718	326.4	1985611	0.48	1807	None	221	1985611	0	8984.67	11718	4322	39290	2012	48.13
BVI9.bin.20	83.86	4.86	Gradient Boost (General Model)	11	0.867	31727	305.548	2066299	0.53	1958	None	95	2066299	0	21750.5	31727	12031	123745	2096	52.93
BVI9.bin.25	81.75	0.55	Neural Network (Specific Model)	11	0.916	16587	336.987	1712702	0.55	1554	None	133	1712702	0	12877.5	16587	6979	54257	2331	54.84
BVI9.bin.29	97.92	1.24	Gradient Boost (General Model)	11	0.934	18804	353.422	1841561	0.52	1625	None	138	1841561	0	13344.6	18804	6638	46877	2073	51.94
BVI9.bin.3	100	4.66	Gradient Boost (General Model)	11	0.878	138859	297.663	2534731	0.49	2497	None	39	2534731	0	64993.1	138859	35038	240208	2142	49.2
BVI9.bin.33	85.29	0.4	Gradient Boost (General Model)	11	0.895	12187	297.735	1991402	0.49	1997	None	219	1991402	0	9093.16	12187	4298	41851	2028	49.16
BVI9.bin.34	68.41	1.12	Neural Network (Specific Model)	11	0.928	7825	328.228	1503758	0.55	1419	None	227	1503758	0	6624.48	7825	3566	35320	2004	54.81
BVI9.bin.35	86.65	1.26	Neural Network (Specific Model)	11	0.888	18063	333.724	2390681	0.49	2123	None	183	2390681	0	13063.8	18063	6525	48778	2042	48.86
BVI9.bin.39	54.9	0.49	Neural Network (Specific Model)	11	0.931	6754	332.672	1411547	0.55	1319	None	256	1411547	0	5513.86	6754	2999	22098	2002	55.02
BVI9.bin.4	95.8	0.01	Neural Network (Specific Model)	11	0.886	34806	321.972	2278962	0.54	2095	None	104	2278962	0	21913.1	34806	9697	98063	2221	53.99
BVI9.bin.47	95.13	1.17	Neural Network (Specific Model)	11	0.893	31956	359.237	2246285	0.51	1864	None	97	2246285	0	23157.6	31956	10448	121011	2446	50.89
BVI9.bin.48	87.61	0.06	Gradient Boost (General Model)	11	0.909	67961	340.899	2337795	0.47	2082	None	44	2337795	0	53131.7	67961	31300	264226	3089	47.4
BVI9.bin.5	86.14	3.07	Neural Network (Specific Model)	11	0.91	22326	367.6	2501360	0.5	2067	None	179	2501360	0	13974.1	22326	5648	117271	2085	49.84
BVI9.bin.54	82.05	2.67	Neural Network (Specific Model)	11	0.887	10504	293.195	2529541	0.65	2555	None	324	2529541	0	7807.23	10504	3650	64906	2030	65.26
BVI9.bin.64	99	3.3	Gradient Boost (General Model)	11	0.882	48696	316.168	3020504	0.44	2813	None	93	3020504	0	32478.5	48696	18937	243102	2035	44.27
BVI9.bin.70	52.84	0.22	Neural Network (Specific Model)	11	0.908	80589	355.086	1867841	0.5	1595	None	38	1867841	0	49153.7	80589	28187	174619	2588	49.58
BVI9.bin.71	97.9	0.23	Neural Network (Specific Model)	11	0.886	20106	313.056	2492423	0.58	2356	None	167	2492423	0	14924.7	20106	6735	84753	2162	57.52
BVI9.bin.74	82.59	3.99	Neural Network (Specific Model)	11	0.928	31540	363.092	2293492	0.49	1956	None	123	2293492	0	18646.3	31540	9082	107257	2027	49.05
BVI9.bin.79	87.86	2.45	Gradient Boost (General Model)	11	0.904	7390	295.145	1413572	0.55	1445	None	235	1413572	0	6015.2	7390	3169	26000	2018	54.85
BVI9.bin.80	73.67	0	Neural Network (Specific Model)	11	0.867	5061	289.334	1699566	0.53	1701	None	369	1699566	0	4605.87	5061	2648	31791	2003	53.35
BVI9.bin.89	93.54	1.2	Neural Network (Specific Model)	11	0.874	33253	313.87	2265457	0.48	2107	None	96	2265457	0	23598.5	33253	11780	134467	2262	47.74
BVI9.bin.92	77.16	1.32	Neural Network (Specific Model)	11	0.898	6030	297.934	1838859	0.48	1850	None	352	1838859	0	5224.03	6030	2933	26343	2004	48.03
CD1.bin.1	97.5	0.67	Gradient Boost (General Model)	11	0.89	23434	305.997	2149861	0.42	2087	None	155	2149861	0	13870.1	23434	5408	139579	2010	42.22
CD1.bin.10	84.56	0.03	Neural Network (Specific Model)	11	0.906	26604	345.5	2120685	0.5	1857	None	110	2120685	0	19279	26604	10621	76411	2093	50.16
CD1.bin.2	74.17	0.11	Gradient Boost (General Model)	11	0.889	5428	276.256	1349672	0.44	1451	None	288	1349672	0	4686.36	5428	2602	17726	2008	43.8
CD1.bin.21	99.45	0.07	Neural Network (Specific Model)	11	0.898	43832	356.762	2211667	0.53	1859	None	78	2211667	0	28354.7	43832	13607	122339	2240	52.75
CD1.bin.22	51.37	0	Gradient Boost (General Model)	11	0.887	69988	320.679	1608652	0.47	1487	None	35	1608652	0	45961.5	69988	20835	249708	2442	46.88
CD1.bin.24	80.48	0.81	Gradient Boost (General Model)	11	0.879	34694	314.137	2357402	0.59	2201	None	105	2357402	0	22451.5	34694	11108	101775	2713	58.63
CD1.bin.25	98.59	0.05	Neural Network (Specific Model)	11	0.921	57451	341.966	2099304	0.48	1889	None	70	2099304	0	29990.1	57451	13671	130965	2510	48.18
CD1.bin.7	81.49	0.02	Gradient Boost (General Model)	11	0.925	10320	300.285	1535990	0.41	1580	None	201	1535990	0	7641.74	10320	3722	44919	2023	40.63
CD1.bin.8	88.22	2.53	Gradient Boost (General Model)	11	0.896	11424	312.266	2994514	0.6	2870	None	368	2994514	0	8137.27	11424	3665	44093	2001	60.45
CD1.bin.9	99.96	0.15	Neural Network (Specific Model)	11	0.904	75567	358.054	2539547	0.58	2142	None	45	2539547	0	56434.4	75567	39033	135845	2467	58.01
DF1.bin.101	70.81	1.7	Gradient Boost (General Model)	11	0.899	10426	295.567	1887403	0.61	1917	None	254	1887403	0	7430.72	10426	3549	38171	2020	60.82
DF1.bin.12	71.49	0.43	Neural Network (Specific Model)	11	0.876	60422	320.202	2170411	0.48	1984	None	53	2170411	0	40951.2	60422	20564	183744	3050	48.42
DF1.bin.26	90.71	0.81	Gradient Boost (General Model)	11	0.892	57837	336.08	3036368	0.49	2689	None	83	3036368	0	36582.8	57837	16106	263694	2313	49.49
DF1.bin.30	91.37	2.75	Gradient Boost (General Model)	11	0.857	6013	277.833	2601377	0.42	2682	None	506	2601377	0	5141.06	6013	2602	28320	2003	41.97
DF1.bin.32	91.77	0.35	Gradient Boost (General Model)	11	0.868	16653	289.618	2787100	0.52	2788	None	248	2787100	0	11238.3	16653	5165	69822	2040	52.14
DF1.bin.37	83.46	1.66	Gradient Boost (General Model)	11	0.916	6501	322.39	1881349	0.46	1783	None	356	1881349	0	5284.69	6501	2823	25404	2030	46
DF1.bin.41	98.25	1	Gradient Boost (General Model)	11	0.899	56793	331.531	2989089	0.49	2706	None	74	2989089	0	40393.1	56793	22032	189365	2358	48.86
DF1.bin.43	86.22	4.86	Gradient Boost (General Model)	11	0.884	9552	284.217	2108189	0.53	2188	None	291	2108189	0	7244.64	9552	3453	40273	2007	52.89
DF1.bin.47	67.48	0.97	Gradient Boost (General Model)	11	0.931	4374	285.724	1194748	0.57	1301	None	300	1194748	0	3982.49	4374	2374	13883	2002	56.77
DF1.bin.50	98.41	3.71	Gradient Boost (General Model)	11	0.902	46334	325.688	3470734	0.5	3212	None	124	3470734	0	27989.8	46334	15452	120723	2185	50.04
DF1.bin.51	90.7	0.34	Gradient Boost (General Model)	11	0.942	9030	337.141	1392197	0.54	1299	None	199	1392197	0	6995.96	9030	3529	29697	2082	53.79
DF1.bin.53	69.92	1.42	Neural Network (Specific Model)	11	0.886	66706	332.507	2564711	0.49	2281	None	63	2564711	0	40709.7	66706	29292	185995	2114	48.99
DF1.bin.58	96.93	0.39	Gradient Boost (General Model)	11	0.876	84093	292.373	879005	0.46	879	None	18	879005	0	48833.6	84093	24789	112784	3642	46.11
DF1.bin.67	96.68	4.79	Gradient Boost (General Model)	11	0.859	25032	289.426	2959223	0.49	2933	None	197	2959223	0	15021.4	25032	6677	138189	2047	49.34
DF1.bin.71	96.07	1.31	Neural Network (Specific Model)	11	0.916	58325	297.752	1736806	0.41	1785	None	46	1736806	0	37756.7	58325	25369	183044	2050	40.57
DF1.bin.72	76.51	3.72	Neural Network (Specific Model)	11	0.888	11057	325.576	2384087	0.43	2170	None	287	2384087	0	8306.92	11057	4083	39315	2092	43.44
DF1.bin.8	92.75	1.97	Gradient Boost (General Model)	11	0.899	15331	322.46	1601915	0.65	1490	None	158	1601915	0	10138.7	15331	4642	125861	2020	64.7
DF1.bin.80	79.56	0.88	Gradient Boost (General Model)	11	0.911	6946	311.871	1309698	0.42	1276	None	223	1309698	0	5873.08	6946	2994	34985	2038	41.84
DF1.bin.81	95.09	0.39	Gradient Boost (General Model)	11	0.817	19984	308.378	1841017	0.42	1629	None	148	1841017	0	12439.3	19984	5708	77110	2066	41.63
DF1.bin.84	78.99	1.68	Neural Network (Specific Model)	11	0.904	29910	333.068	2236226	0.45	2026	None	100	2236226	0	22362.3	29910	13915	77199	2028	45.19
DF10.bin.13	60.89	0.58	Neural Network (Specific Model)	11	0.904	8853	345.414	2181297	0.46	1906	None	308	2181297	0	7082.13	8853	3538	36307	2014	46.24
DF10.bin.16	87.79	2.99	Gradient Boost (General Model)	11	0.918	74761	339.594	2262919	0.5	2042	None	57	2262919	0	39700.3	74761	19932	183528	3326	49.92
DF10.bin.2	95.78	1.65	Gradient Boost (General Model)	11	0.938	17035	345.387	1801871	0.57	1634	None	158	1801871	0	11404.2	17035	4787	89481	2044	56.67
DF10.bin.22	91.09	1.91	Gradient Boost (General Model)	11	0.911	65968	328.667	2464238	0.5	2280	None	55	2464238	0	44804.3	65968	21032	182162	2409	50.12
DF10.bin.24	93.74	2.79	Gradient Boost (General Model)	11	0.889	56555	332.499	3244792	0.5	2897	None	97	3244792	0	33451.5	56555	20312	199407	2049	49.51
DF10.bin.32	64.88	2.73	Gradient Boost (General Model)	11	0.91	3798	282.454	1154442	0.48	1241	None	316	1154442	0	3653.3	3798	2299	10912	2001	47.96
DF10.bin.33	78.4	1.21	Gradient Boost (General Model)	11	0.907	5662	282.711	1165774	0.47	1249	None	239	1165774	0	4877.72	5662	2635	17749	2002	47.4
DF10.bin.38	84.36	0.92	Neural Network (Specific Model)	11	0.92	25805	308.936	2159270	0.37	2146	None	133	2159270	0	16235.1	25805	7046	96778	2026	36.64
DF10.bin.47	92.99	1.81	Neural Network (Specific Model)	11	0.933	23644	354.74	2280890	0.51	2006	None	143	2280890	0	15950.3	23644	8046	93127	2017	51.1
DF10.bin.50	77.82	4.75	Neural Network (Specific Model)	11	0.944	8335	318.553	1618477	0.51	1603	None	252	1618477	0	6422.53	8335	3043	36213	2012	51.39
DF10.bin.58	53.67	0.01	Neural Network (Specific Model)	11	0.913	18652	344.353	1329746	0.47	1177	None	97	1329746	0	13708.7	18652	6391	71750	2051	47
DF10.bin.61	82.24	0.39	Gradient Boost (General Model)	11	0.917	15680	310.935	2134157	0.48	2100	None	191	2134157	0	11173.6	15680	5234	55059	2030	48.35
DF10.bin.63	99.95	0.32	Neural Network (Specific Model)	11	0.871	51735	311.768	2758211	0.47	2576	None	109	2758211	0	25304.7	51735	11656	159134	2014	46.8
DF10.bin.69	66.01	2.1	Gradient Boost (General Model)	11	0.901	5243	300.027	1204334	0.61	1207	None	259	1204334	0	4649.94	5243	2406	20892	2001	60.91
DF10.bin.72	73.67	3.03	Neural Network (Specific Model)	11	0.922	6612	330.7	1716268	0.51	1597	None	310	1716268	0	5536.35	6612	2875	19930	2003	50.7
DF10.bin.76	73.39	3.75	Neural Network (Specific Model)	11	0.898	5983	282.969	2296122	0.66	2434	None	437	2296122	0	5254.28	5983	2629	35458	2010	65.59
DF10.bin.77	93.18	0.43	Gradient Boost (General Model)	11	0.9	66828	348.172	2320706	0.36	2004	None	55	2320706	0	42194.7	66828	27705	243600	2002	36.25
DF10.bin.78	96.51	0.23	Gradient Boost (General Model)	11	0.906	30422	344.495	1750507	0.6	1536	None	90	1750507	0	19450.1	30422	9193	106827	2153	59.6
DF10.bin.8	70.62	0.22	Gradient Boost (General Model)	11	0.942	9114	326.186	780346	0.53	752	None	111	780346	0	7030.14	9114	3620	32844	2006	52.83
DF10.bin.83	95.67	1.2	Gradient Boost (General Model)	11	0.901	127197	313.689	2665381	0.39	2557	None	41	2665381	0	65009.3	127197	29936	271268	2021	38.86
DF10.bin.95	53.05	0.16	Neural Network (Specific Model)	11	0.902	3676	293.266	1170645	0.54	1201	None	336	1170645	0	3484.06	3676	2292	9381	2012	53.89
DF10.bin.96	88.58	1.24	Gradient Boost (General Model)	11	0.892	16303	292.906	2595524	0.45	2637	None	228	2595524	0	11383.9	16303	5301	91260	2039	44.79
DF11.bin.10	62.75	0.1	Neural Network (Specific Model)	11	0.914	30347	346.338	1542106	0.43	1359	None	88	1542106	0	17523.9	30347	7582	62314	2650	43.15
DF11.bin.13	78.44	3.35	Neural Network (Specific Model)	11	0.909	6384	290.105	2448314	0.44	2562	None	452	2448314	0	5416.62	6384	2782	25623	2021	43.67
DF11.bin.17	76.43	4.04	Neural Network (Specific Model)	11	0.903	118221	334.88	2633986	0.5	2372	None	49	2633986	0	53754.8	118221	27994	212366	2168	50.46
DF11.bin.2	87.63	1.02	Gradient Boost (General Model)	11	0.944	9170	351.095	1331028	0.54	1194	None	176	1331028	0	7562.66	9170	3659	28703	2008	53.65
DF11.bin.27	66.87	0.95	Neural Network (Specific Model)	11	0.914	6299	317.758	1836345	0.46	1763	None	347	1836345	0	5292.06	6299	2898	26241	2008	45.86
DF11.bin.38	57.12	0.77	Gradient Boost (General Model)	11	0.917	9595	307.443	966957	0.63	963	None	135	966957	0	7162.64	9595	3265	29333	2054	63.25
DF11.bin.40	79.2	2.62	Neural Network (Specific Model)	11	0.909	16540	306.667	2448793	0.36	2424	None	212	2448793	0	11550.9	16540	5379	57938	2067	35.71
DF11.bin.58	71.79	3.64	Neural Network (Specific Model)	11	0.913	7028	293.549	2774145	0.41	2881	None	485	2774145	0	5719.89	7028	2803	59992	2005	40.87
DF11.bin.6	88.59	1.24	Gradient Boost (General Model)	11	0.884	28180	281.283	1418576	0.26	1489	None	77	1418576	0	18423.1	28180	9301	103154	2024	25.89
DF11.bin.65	89.13	0.43	Neural Network (Specific Model)	11	0.893	106516	316.51	3272815	0.42	3085	None	57	3272815	0	57417.8	106516	41250	272830	2286	42.18
DF11.bin.69	78.84	3.44	Gradient Boost (General Model)	11	0.897	12072	292.846	2049119	0.63	2094	None	247	2049119	0	8296.03	12072	3511	64152	2051	62.89
DF11.bin.74	86.61	4.02	Gradient Boost (General Model)	11	0.877	126802	319.66	4166222	0.49	3819	None	52	4166222	0	80119.7	126802	40326	399461	2129	49.21
DF11.bin.79	90.7	0.1	Neural Network (Specific Model)	11	0.905	79893	375.486	2807637	0.47	2259	None	58	2807637	0	48407.5	79893	24001	209382	2063	46.8
DF11.bin.82	64.82	0.96	Neural Network (Specific Model)	11	0.915	14836	316.315	1826983	0.49	1764	None	175	1826983	0	10439.9	14836	5407	35697	2063	49.23
DF11.bin.83	84.14	1.17	Gradient Boost (General Model)	11	0.944	11696	353.429	1554001	0.58	1385	None	179	1554001	0	8681.57	11696	4128	35762	2023	57.84
DF12.bin.1	87.08	4.2	Neural Network (Specific Model)	11	0.923	22408	368.724	2654217	0.48	2217	None	194	2654217	0	13681.5	22408	6454	78863	2001	47.94
DF12.bin.13	99.98	0.05	Neural Network (Specific Model)	11	0.934	179841	316.427	1688733	0.37	1665	None	19	1688733	0	88880.7	179841	72055	271867	7665	36.8
DF12.bin.17	99	0.07	Neural Network (Specific Model)	11	0.915	60475	358.247	2747621	0.47	2343	None	61	2747621	0	45043	60475	25698	148034	2076	47.02
DF12.bin.19	81.86	0.39	Neural Network (Specific Model)	11	0.88	11464	296.733	2256412	0.54	2235	None	268	2256412	0	8419.45	11464	3886	53525	2031	53.73
DF12.bin.24	98.91	2.13	Gradient Boost (General Model)	11	0.874	62090	312.692	3015426	0.43	2813	None	100	3015426	0	30154.3	62090	13828	144026	2018	43.19
DF12.bin.25	80.8	0.01	Neural Network (Specific Model)	11	0.899	38584	352.333	2349159	0.5	2002	None	95	2349159	0	24728	38584	11711	122265	2481	49.56
DF12.bin.42	84.47	4.38	Gradient Boost (General Model)	11	0.923	8579	303.984	1744981	0.51	1770	None	258	1744981	0	6763.49	8579	3294	34438	2034	50.95
DF12.bin.48	70.52	0.01	Neural Network (Specific Model)	11	0.94	7457	327.114	1252890	0.53	1202	None	204	1252890	0	6141.62	7457	3084	25195	2059	53.18
DF12.bin.52	83.31	2.69	Gradient Boost (General Model)	11	0.938	13403	347.489	1967846	0.48	1776	None	199	1967846	0	9888.67	13403	4824	37895	2017	48.45
DF12.bin.53	91.44	1.44	Neural Network (Specific Model)	11	0.867	15931	307.095	2732967	0.4	2580	None	256	2732967	0	10675.6	15931	4857	63739	2000	40.28
DF12.bin.58	99.96	0	Neural Network (Specific Model)	11	0.839	39280	319.716	2575943	0.52	2256	None	96	2575943	0	26832.7	39280	15317	130320	2069	52.46
DF12.bin.63	91.96	1.3	Gradient Boost (General Model)	11	0.89	54831	289.777	1441220	0.25	1478	None	42	1441220	0	34314.8	54831	19497	164987	2089	24.54
DF12.bin.69	97.65	0.25	Gradient Boost (General Model)	11	0.938	49196	388.04	2054373	0.56	1658	None	68	2054373	0	30211.4	49196	16000	109701	2148	56.32
DF12.bin.70	88.47	0.66	Neural Network (Specific Model)	11	0.912	26271	328.442	2173743	0.57	2015	None	120	2173743	0	18114.5	26271	8380	88438	2168	56.83
DF12.bin.76	98.83	1.25	Gradient Boost (General Model)	11	0.881	18259	294.59	2254532	0.53	2250	None	169	2254532	0	13340.4	18259	6317	62063	2232	52.62
DF12.bin.83	70.72	0.56	Neural Network (Specific Model)	11	0.915	6438	312.845	1747943	0.45	1707	None	320	1747943	0	5462.32	6438	2796	26663	2001	45.48
DF12.bin.85	83.68	0.46	Neural Network (Specific Model)	11	0.908	16472	355.246	2225910	0.53	1898	None	198	2225910	0	11242	16472	5246	50727	2017	52.84
DF12.bin.90	97.64	0.01	Gradient Boost (General Model)	11	0.91	479269	357.312	1850860	0.48	1573	None	5	1850860	0	370172	479269	297511	618367	143190	47.71
DF12.bin.92	71.47	1.96	Gradient Boost (General Model)	11	0.892	5195	276.835	1502060	0.49	1617	None	307	1502060	0	4892.7	5195	2818	14320	2001	48.72
DF13.bin.12	65.26	1.59	Gradient Boost (General Model)	11	0.948	4554	303.198	1313056	0.52	1372	None	315	1313056	0	4168.43	4554	2550	15683	2022	51.77
DF13.bin.15	54.83	0.5	Neural Network (Specific Model)	11	0.884	3724	259.462	1673427	0.47	1904	None	466	1673427	0	3591.05	3724	2272	10766	2004	46.7
DF13.bin.18	91.18	3.35	Neural Network (Specific Model)	11	0.867	44988	322.615	2820563	0.4	2533	None	151	2820563	0	18679.2	44988	7703	167081	2014	39.79
DF13.bin.23	80.22	0	Gradient Boost (General Model)	11	0.914	12758	319.576	2606499	0.44	2490	None	294	2606499	0	8865.64	12758	3847	62640	2011	43.74
DF13.bin.25	95.05	0.01	Gradient Boost (General Model)	11	0.895	11577	270.932	900745	0.47	994	None	109	900745	0	8263.72	11577	4021	31948	2013	46.56
DF13.bin.27	97.75	1.17	Neural Network (Specific Model)	11	0.904	159632	333.942	3204137	0.48	2896	None	34	3204137	0	94239.3	159632	43125	542136	7208	48.38
DF13.bin.33	71.1	1.46	Neural Network (Specific Model)	11	0.883	8717	284.769	1772986	0.53	1834	None	265	1772986	0	6690.51	8717	3161	28005	2001	52.93
DF13.bin.34	81.3	0.49	Neural Network (Specific Model)	11	0.87	11500	281.518	2642292	0.45	2727	None	308	2642292	0	8578.87	11500	3979	52895	2008	45.16
DF13.bin.36	97.68	3.31	Gradient Boost (General Model)	11	0.894	27536	295.513	2171699	0.49	2193	None	113	2171699	0	19218.6	27536	11032	69298	2061	49.27
DF13.bin.37	88.2	0.31	Gradient Boost (General Model)	11	0.94	8085	332.464	1301831	0.54	1229	None	203	1301831	0	6412.96	8085	3282	28086	2111	53.62
DF13.bin.45	59.1	0.85	Neural Network (Specific Model)	11	0.884	4900	277.625	1108187	0.39	1177	None	246	1108187	0	4504.83	4900	2601	23237	2030	39.21
DF13.bin.48	86.16	0.3	Neural Network (Specific Model)	11	0.891	23981	327.229	1912398	0.56	1738	None	131	1912398	0	14598.5	23981	6664	88250	2121	56.06
DF13.bin.57	100	0	Gradient Boost (General Model)	11	0.876	126145	327.282	2348103	0.54	2098	None	29	2348103	0	80969.1	126145	40142	166572	4884	53.69
DF13.bin.64	86.27	0.1	Neural Network (Specific Model)	11	0.935	113590	325.883	1812584	0.45	1737	None	30	1812584	0	60419.5	113590	25599	316809	2731	44.62
DF13.bin.71	91.98	0.11	Neural Network (Specific Model)	11	0.933	12617	290.966	1714058	0.36	1837	None	195	1714058	0	8790.04	12617	3807	58011	2021	36.24
DF13.bin.72	72.82	1.56	Gradient Boost (General Model)	11	0.882	9342	301.604	1387057	0.44	1354	None	193	1387057	0	7186.82	9342	3228	110312	2016	43.77
DF13.bin.84	98.82	0.01	Neural Network (Specific Model)	11	0.898	138078	333.796	2466761	0.41	2215	None	27	2466761	0	91361.5	138078	47840	246071	3823	41.07
DF13.bin.86	69.07	1.57	Neural Network (Specific Model)	11	0.927	5164	304.389	1387319	0.49	1410	None	306	1387319	0	4533.72	5164	2551	16205	2005	49.11
DF13.bin.93	99.32	0	Neural Network (Specific Model)	11	0.899	153860	351.108	2660909	0.49	2274	None	23	2660909	0	115692	153860	73983	330877	5609	49.13
DF13.bin.96	96.59	0.95	Gradient Boost (General Model)	11	0.906	138061	329.327	3347824	0.46	3077	None	53	3347824	0	63166.5	138061	29790	256324	2023	46.49
DF14.bin.21	99.93	0.28	Neural Network (Specific Model)	11	0.878	51627	321.766	2637175	0.53	2406	None	82	2637175	0	32160.7	51627	16813	155093	2119	52.66
DF14.bin.28	79.16	2.48	Neural Network (Specific Model)	11	0.923	17552	321.733	2208152	0.52	2116	None	175	2208152	0	12618	17552	6141	68557	2017	51.8
DF14.bin.39	83.35	0.41	Gradient Boost (General Model)	11	0.902	123865	337.229	2400237	0.45	2143	None	36	2400237	0	66673.2	123865	33511	270587	2310	44.77
DF14.bin.49	92.58	0.22	Gradient Boost (General Model)	11	0.941	9528	332.853	1446934	0.54	1366	None	209	1446934	0	6923.13	9528	3215	33613	2017	53.58
DF14.bin.54	66.89	0.62	Gradient Boost (General Model)	11	0.871	11637	246.862	605463	0.29	715	None	73	605463	0	8294.01	11637	4342	28600	2028	29.01
DF14.bin.55	99.44	2.2	Gradient Boost (General Model)	11	0.86	29883	299.709	2671603	0.46	2559	None	160	2671603	0	16697.5	29883	7019	111737	2029	45.52
DF14.bin.57	65.18	0.76	Gradient Boost (General Model)	11	0.955	8289	297.559	599979	0.47	644	None	93	599979	0	6451.39	8289	3041	26432	2002	46.68
DF14.bin.68	55.61	0.07	Neural Network (Specific Model)	11	0.908	29127	346.151	1497964	0.47	1311	None	87	1497964	0	17218	29127	8517	104590	2033	46.65
DF14.bin.74	57.89	0.17	Neural Network (Specific Model)	11	0.885	84592	313.271	1452664	0.48	1370	None	30	1452664	0	48422.1	84592	20614	176511	3677	48.22
DF14.bin.78	87.67	2.88	Gradient Boost (General Model)	11	0.912	9945	290.003	1672714	0.43	1756	None	242	1672714	0	6912.04	9945	3261	41393	2000	42.54
DF14.bin.86	100	1.42	Gradient Boost (General Model)	11	0.888	22475	297.063	2481670	0.48	2475	None	181	2481670	0	13710.9	22475	6166	91442	2051	47.89
DF14.bin.9	73.03	0.38	Gradient Boost (General Model)	11	0.912	29363	329.58	1264777	0.48	1168	None	69	1264777	0	18330.1	29363	10124	68397	2047	47.76
DF15.bin.11	92.81	0	Gradient Boost (General Model)	11	0.927	147058	333.731	1963238	0.49	1821	None	31	1963238	0	63330.3	147058	41322	218250	2020	49.45
DF15.bin.19	91.18	0.4	Neural Network (Specific Model)	11	0.928	176424	378.534	2260291	0.49	1848	None	27	2260291	0	83714.5	176424	35774	308261	9449	48.56
DF15.bin.21	84.29	0.6	Neural Network (Specific Model)	11	0.911	9475	286.431	1981310	0.42	2103	None	281	1981310	0	7050.93	9475	3659	37830	2004	41.53
DF15.bin.33	91.49	2.68	Neural Network (Specific Model)	11	0.88	23684	307.671	2651203	0.53	2532	None	187	2651203	0	14177.6	23684	6056	68057	2042	52.76
DF15.bin.35	85.62	1.95	Neural Network (Specific Model)	11	0.92	11884	331.922	2054386	0.45	1900	None	242	2054386	0	8489.2	11884	3937	46418	2014	45.08
DF15.bin.48	57.93	1.47	Neural Network (Specific Model)	11	0.922	4395	298.136	1458185	0.5	1505	None	351	1458185	0	4154.37	4395	2493	17540	2009	49.71
DF15.bin.5	53.09	0.46	Gradient Boost (General Model)	11	0.942	3819	289.403	832566	0.53	905	None	227	832566	0	3667.69	3819	2333	11770	2009	52.78
DF15.bin.51	99.19	1.83	Gradient Boost (General Model)	11	0.916	16528	337.615	1920905	0.51	1741	None	173	1920905	0	11103.5	16528	5771	45173	2010	50.9
DF15.bin.64	88.77	0.05	Neural Network (Specific Model)	11	0.906	146951	357.552	2478371	0.5	2096	None	34	2478371	0	72893.3	146951	44906	270721	6121	49.93
DF15.bin.70	87.97	0.84	Neural Network (Specific Model)	11	0.895	15825	302.175	2457319	0.48	2431	None	244	2457319	0	10071	15825	4342	57367	2015	47.57
DF15.bin.73	88.57	1.72	Gradient Boost (General Model)	11	0.941	8384	339.701	1336757	0.53	1236	None	199	1336757	0	6717.37	8384	3442	34352	2007	53.43
DF15.bin.78	96.36	0.65	Gradient Boost (General Model)	11	0.943	10492	334.396	1637990	0.58	1542	None	213	1637990	0	7690.09	10492	3680	34462	2120	57.69
DF16.bin.28	88.4	1.42	Gradient Boost (General Model)	11	0.901	34112	329.292	2985332	0.45	2729	None	176	2985332	0	16962.1	34112	7750	89122	2045	44.87
DF16.bin.3	71.81	1.8	Neural Network (Specific Model)	11	0.908	6680	312.787	1837917	0.53	1782	None	319	1837917	0	5761.5	6680	2973	24690	2021	53.11
DF16.bin.37	74.43	2.51	Neural Network (Specific Model)	11	0.915	11299	348.894	2783703	0.52	2436	None	337	2783703	0	8260.25	11299	3979	38620	2006	51.71
DF16.bin.38	63.01	0.5	Neural Network (Specific Model)	11	0.943	8027	343.599	1078549	0.54	988	None	166	1078549	0	6497.28	8027	3325	32077	2019	53.99
DF16.bin.39	84.89	2.85	Gradient Boost (General Model)	11	0.899	7317	315.468	2240483	0.5	2132	None	369	2240483	0	6071.77	7317	3215	24805	2030	49.86
DF16.bin.44	94.19	2.34	Gradient Boost (General Model)	11	0.872	23383	299.012	2829435	0.46	2756	None	210	2829435	0	13473.5	23383	6097	57696	2060	45.77
DF16.bin.50	77.19	1.37	Gradient Boost (General Model)	11	0.87	30401	308.753	2407857	0.53	2264	None	127	2407857	0	18959.5	30401	10180	117653	2003	53.21
DF16.bin.53	71.93	0.66	Gradient Boost (General Model)	11	0.878	6778	279.863	1907002	0.6	1998	None	331	1907002	0	5761.34	6778	2839	37700	2038	59.97
DF16.bin.58	75.61	0.54	Neural Network (Specific Model)	11	0.913	5028	273.71	1871414	0.51	2089	None	412	1871414	0	4542.27	5028	2585	15767	2010	51.47
DF16.bin.6	86.1	2.76	Gradient Boost (General Model)	11	0.884	8150	283.718	2583077	0.52	2688	None	388	2583077	0	6657.42	8150	3464	33269	2002	52.41
DF16.bin.66	60.33	1.15	Neural Network (Specific Model)	11	0.882	6077	279.896	1807153	0.65	1901	None	366	1807153	0	4937.58	6077	2485	31350	2004	65.22
DF16.bin.67	92.98	0.03	Gradient Boost (General Model)	11	0.943	9152	335.057	1544095	0.58	1451	None	222	1544095	0	6955.38	9152	3248	31528	2010	58.23
DF16.bin.68	99.89	1.78	Gradient Boost (General Model)	11	0.897	153168	342.71	3696175	0.5	3230	None	54	3696175	0	68447.7	153168	34063	535307	2257	50.19
DF16.bin.73	97.53	2.32	Gradient Boost (General Model)	11	0.869	101184	326.619	4324301	0.49	3841	None	68	4324301	0	63592.7	101184	37175	392177	2502	49.06
DF17.bin.1	75.45	2.98	Gradient Boost (General Model)	11	0.901	7728	304.435	1211646	0.61	1197	None	203	1211646	0	5968.7	7728	2892	42163	2019	60.94
DF17.bin.11	94.04	3.89	Neural Network (Specific Model)	11	0.884	69645	303.91	2455522	0.52	2385	None	57	2455522	0	43079.3	69645	20941	181450	3852	51.58
DF17.bin.12	80.52	2.71	Neural Network (Specific Model)	11	0.922	7215	274.438	1562082	0.37	1754	None	262	1562082	0	5962.15	7215	2990	36538	2011	37.33
DF17.bin.16	63.83	0.59	Neural Network (Specific Model)	11	0.912	27042	336.717	2027564	0.52	1833	None	122	2027564	0	16619.4	27042	6657	131641	2084	51.85
DF17.bin.18	85.68	0.04	Neural Network (Specific Model)	11	0.9	48875	356.365	2696188	0.5	2274	None	77	2696188	0	35015.4	48875	18670	184890	2045	49.96
DF17.bin.2	83.22	1.75	Neural Network (Specific Model)	11	0.934	13812	319.869	1687952	0.47	1646	None	167	1687952	0	10107.5	13812	4634	77751	2030	46.51
DF17.bin.22	97.97	0.29	Gradient Boost (General Model)	11	0.896	28579	310.423	1979140	0.41	1909	None	111	1979140	0	17830.1	28579	9046	90894	2037	41.02
DF17.bin.27	54.46	0.76	Gradient Boost (General Model)	11	0.949	4248	307.702	1255570	0.55	1294	None	310	1255570	0	4050.23	4248	2518	14070	2002	55.08
DF17.bin.28	99.71	0.32	Neural Network (Specific Model)	11	0.932	28808	297.579	1869064	0.36	1956	None	116	1869064	0	16112.6	28808	6817	118306	2002	36.03
DF17.bin.31	92.31	2.83	Gradient Boost (General Model)	11	0.937	7358	328.065	1588881	0.52	1515	None	255	1588881	0	6230.91	7358	3198	27686	2016	51.95
DF17.bin.35	80.59	4.16	Gradient Boost (General Model)	11	0.924	9535	313.072	1472367	0.5	1451	None	211	1472367	0	6978.04	9535	3404	31994	2021	49.79
DF17.bin.38	63.87	1.91	Gradient Boost (General Model)	11	0.906	4552	286.075	1318135	0.44	1394	None	319	1318135	0	4132.08	4552	2381	17141	2001	44.21
DF17.bin.44	82.65	2.26	Neural Network (Specific Model)	11	0.888	8538	286.947	2423832	0.52	2507	None	366	2423832	0	6622.49	8538	3134	29655	2003	51.56
DF17.bin.50	92.21	0.01	Gradient Boost (General Model)	11	0.944	15699	374.357	1762608	0.58	1483	None	151	1762608	0	11672.9	15699	5597	55485	2075	57.61
DF17.bin.51	73.94	1.1	Gradient Boost (General Model)	11	0.919	4347	272.44	1760564	0.54	1985	None	436	1760564	0	4037.99	4347	2392	15345	2002	54.38
DF17.bin.53	72.46	0.4	Neural Network (Specific Model)	11	0.908	5609	289.463	1619570	0.37	1696	None	320	1619570	0	5061.16	5609	2637	32235	2008	36.79
DF17.bin.56	97.83	1.66	Neural Network (Specific Model)	11	0.869	50670	307.705	2327052	0.46	2195	None	94	2327052	0	24755.9	50670	9710	150591	2703	46.04
DF17.bin.57	97.12	2.42	Gradient Boost (General Model)	11	0.885	44858	292.563	2415112	0.5	2438	None	90	2415112	0	26834.6	44858	15472	102007	2021	49.55
DF17.bin.66	81.03	0.49	Gradient Boost (General Model)	11	0.884	12159	323.495	2193146	0.49	2000	None	269	2193146	0	8152.96	12159	3863	33244	2020	48.7
DF17.bin.67	93.38	0.62	Gradient Boost (General Model)	11	0.906	44570	333.617	2354605	0.42	2135	None	96	2354605	0	24527.1	44570	11972	132829	2099	42.29
DF17.bin.83	65.44	0.95	Gradient Boost (General Model)	11	0.907	19178	297.984	1548388	0.6	1575	None	125	1548388	0	12387.1	19178	5129	67447	2013	60.37
DF17.bin.88	91.62	0.61	Gradient Boost (General Model)	11	0.94	7267	324.342	1172852	0.54	1135	None	185	1172852	0	6339.74	7267	3256	30196	2079	53.9
DF17.bin.9	91.78	2.44	Gradient Boost (General Model)	11	0.921	10712	313.825	2264346	0.5	2219	None	285	2264346	0	7945.07	10712	3941	35098	2039	50.07
DF18.bin.1	99.98	4.01	Neural Network (Specific Model)	11	0.907	169797	334.147	3666542	0.48	3323	None	43	3666542	0	85268.4	169797	50895	289142	2191	47.62
DF18.bin.102	97.9	3.78	Gradient Boost (General Model)	11	0.917	46707	323.979	3190268	0.48	3016	None	122	3190268	0	26149.7	46707	12652	243607	2226	47.89
DF18.bin.104	94.65	1.93	Gradient Boost (General Model)	11	0.949	10531	360.654	1505675	0.54	1322	None	184	1505675	0	8183.02	10531	4103	38325	2041	53.66
DF18.bin.110	99.33	3.65	Gradient Boost (General Model)	11	0.885	15819	307.732	3050551	0.36	2931	None	303	3050551	0	10067.8	15819	4055	57415	2004	36.32
DF18.bin.111	80.44	3.87	Gradient Boost (General Model)	11	0.94	8485	329.659	1874296	0.53	1785	None	269	1874296	0	6967.64	8485	3629	35902	2010	53.11
DF18.bin.114	78.54	0.89	Gradient Boost (General Model)	11	0.861	5625	272.204	2203594	0.43	2328	None	453	2203594	0	4864.45	5625	2610	26060	2004	43.37
DF18.bin.115	80.14	1.48	Neural Network (Specific Model)	11	0.895	14542	302.772	2381729	0.48	2351	None	245	2381729	0	9721.34	14542	4332	42022	2013	47.78
DF18.bin.119	72.32	2.03	Gradient Boost (General Model)	11	0.92	4713	276.818	1403892	0.39	1559	None	330	1403892	0	4254.22	4713	2380	19197	2008	38.65
DF18.bin.12	56.83	0.93	Neural Network (Specific Model)	11	0.891	5571	311.13	1352475	0.46	1292	None	274	1352475	0	4936.04	5571	2714	14331	2002	45.57
DF18.bin.123	85.1	0	Neural Network (Specific Model)	11	0.922	154110	373.529	2665285	0.51	2197	None	39	2665285	0	68340.6	154110	30111	214704	4766	51.22
DF18.bin.15	95.67	0.06	Gradient Boost (General Model)	11	0.703	42997	260.912	1366685	0.36	1233	None	56	1366685	0	24405.1	42997	14392	143263	2041	36.34
DF18.bin.17	85.01	2.53	Neural Network (Specific Model)	11	0.929	19166	356.358	1860374	0.49	1618	None	131	1860374	0	14201.3	19166	7419	49995	2062	49.35
DF18.bin.19	78.86	3.7	Gradient Boost (General Model)	11	0.921	6500	294.275	1212955	0.59	1267	None	229	1212955	0	5296.75	6500	2678	35540	2003	59.34
DF18.bin.21	98.47	1.31	Neural Network (Specific Model)	11	0.9	24864	346.987	2629043	0.5	2277	None	165	2629043	0	15933.6	24864	7400	124473	2216	49.69
DF18.bin.22	83.13	3.99	Neural Network (Specific Model)	11	0.877	47012	299.928	3164286	0.35	3090	None	128	3164286	0	24721	47012	12148	157510	2076	34.58
DF18.bin.30	90.19	3.02	Neural Network (Specific Model)	11	0.879	19936	292.435	2423201	0.52	2432	None	184	2423201	0	13169.6	19936	6977	48843	2034	51.57
DF18.bin.4	71.66	1.8	Gradient Boost (General Model)	11	0.918	5899	295.65	1109375	0.48	1150	None	220	1109375	0	5042.61	5899	2538	27756	2002	47.9
DF18.bin.40	84.41	0.39	Neural Network (Specific Model)	11	0.909	25027	362.706	2513103	0.44	2102	None	157	2513103	0	16007	25027	7682	78694	2017	43.84
DF18.bin.43	73.69	0.41	Gradient Boost (General Model)	11	0.898	23798	274.79	723399	0.26	789	None	37	723399	0	19551.3	23798	11639	46334	2031	26.47
DF18.bin.47	91.78	2	Neural Network (Specific Model)	11	0.881	37386	295.05	2374189	0.52	2367	None	105	2374189	0	22611.3	37386	11710	147599	2022	52.42
DF18.bin.49	98.77	1.28	Gradient Boost (General Model)	11	0.878	22087	297.912	3212383	0.52	3163	None	216	3212383	0	14872.1	22087	7161	93030	2112	51.95
DF18.bin.51	95.33	2.08	Gradient Boost (General Model)	11	0.931	57217	365.246	1840467	0.54	1567	None	47	1840467	0	39158.9	57217	21697	152167	2518	53.65
DF18.bin.59	87.12	2.83	Gradient Boost (General Model)	11	0.89	32162	317.054	2061057	0.62	1932	None	97	2061057	0	21248	32162	11621	79702	2811	62.5
DF18.bin.62	52.16	0.11	Neural Network (Specific Model)	11	0.894	48820	345.131	1253410	0.42	1083	None	48	1253410	0	26112.7	48820	12843	95596	2024	41.5
DF18.bin.63	89.86	0.87	Neural Network (Specific Model)	11	0.891	11119	302.198	2572652	0.5	2534	None	304	2572652	0	8462.67	11119	4013	45157	2011	50.4
DF18.bin.64	87.37	0.92	Neural Network (Specific Model)	11	0.91	13956	329.463	2342152	0.45	2159	None	234	2342152	0	10009.2	13956	4452	67867	2034	44.64
DF18.bin.67	88.83	2.43	Neural Network (Specific Model)	11	0.915	12549	296.469	2351055	0.39	2424	None	268	2351055	0	8772.59	12549	3750	52194	2007	39.36
DF18.bin.73	82.96	1.06	Neural Network (Specific Model)	11	0.907	15928	349.765	2195392	0.53	1901	None	183	2195392	0	11996.7	15928	5841	63165	2000	52.99
DF18.bin.79	83.23	1.62	Gradient Boost (General Model)	11	0.905	73496	315.767	2804740	0.49	2684	None	54	2804740	0	51939.6	73496	34467	186837	2922	49.02
DF18.bin.80	88.87	0.2	Gradient Boost (General Model)	11	0.885	54877	295.086	894851	0.45	896	None	30	894851	0	29828.4	54877	18359	138152	2064	44.56
DF18.bin.81	93.12	0.03	Gradient Boost (General Model)	11	0.867	22931	325.621	1077304	0.49	958	None	66	1077304	0	16322.8	22931	8513	64142	2265	49.13
DF18.bin.88	78.66	3	Gradient Boost (General Model)	11	0.907	6987	316.994	2052927	0.57	1960	None	352	2052927	0	5832.18	6987	3159	19779	2010	57.04
DF18.bin.90	95.82	0.23	Neural Network (Specific Model)	11	0.885	36631	338.645	2243303	0.49	1958	None	90	2243303	0	24925.6	36631	11872	149035	3684	48.58
DF18.bin.97	94.7	3.78	Gradient Boost (General Model)	11	0.893	51341	322.398	3504198	0.44	3239	None	109	3504198	0	32148.6	51341	15731	212953	2045	43.55
DF18.bin.99	92.48	0.79	Gradient Boost (General Model)	11	0.944	15945	365.406	1837459	0.57	1584	None	154	1837459	0	11931.5	15945	5781	65753	2070	57.46
DF19.bin.14	65.12	1.47	Neural Network (Specific Model)	11	0.913	5314	307.704	1833229	0.46	1816	None	381	1833229	0	4811.62	5314	2677	26026	2001	45.79
DF19.bin.18	99.63	0.21	Neural Network (Specific Model)	11	0.933	24535	291.153	1832580	0.36	1962	None	127	1832580	0	14429.8	24535	6830	81139	2033	35.86
DF19.bin.19	93.67	1.04	Gradient Boost (General Model)	11	0.898	57441	312.329	2546071	0.39	2444	None	70	2546071	0	36372.4	57441	19653	112778	2256	38.91
DF19.bin.20	95.01	1.79	Gradient Boost (General Model)	11	0.911	107427	336.708	2702583	0.49	2441	None	43	2702583	0	62850.8	107427	36559	247018	2522	49.38
DF19.bin.23	95.12	0.08	Gradient Boost (General Model)	11	0.941	12216	352.38	1683475	0.57	1501	None	185	1683475	0	9099.87	12216	4373	37371	2010	57.48
DF19.bin.24	90.65	0.94	Neural Network (Specific Model)	11	0.905	33544	349.913	2203537	0.46	1903	None	97	2203537	0	22716.9	33544	10960	106626	2275	46.32
DF19.bin.38	83.76	0.01	Neural Network (Specific Model)	11	0.909	229319	372.581	2205783	0.52	1796	None	15	2205783	0	147052	229319	74161	380257	21753	52.36
DF19.bin.41	57.29	0.75	Gradient Boost (General Model)	11	0.836	3308	267.466	1279607	0.36	1335	None	379	1279607	0	3376.27	3308	2245	11541	2001	36.21
DF19.bin.42	87.75	0.03	Gradient Boost (General Model)	11	0.949	8474	329.984	1151959	0.54	1106	None	175	1151959	0	6582.62	8474	3225	44022	2021	53.84
DF19.bin.44	68.1	1.09	Neural Network (Specific Model)	11	0.907	37341	335.87	2092210	0.51	1887	None	94	2092210	0	22257.5	37341	9670	135074	2166	51.46
DF19.bin.50	56.94	0.08	Gradient Boost (General Model)	11	0.919	11728	344.367	1132239	0.44	1009	None	117	1132239	0	9677.26	11728	5430	30764	2011	43.54
DF19.bin.52	100	0.01	Gradient Boost (General Model)	11	0.889	183940	305.705	2518939	0.45	2444	None	25	2518939	0	100758	183940	45594	355826	13891	45.25
DF19.bin.57	93.45	0.3	Gradient Boost (General Model)	11	0.937	8040	333.766	1588374	0.52	1489	None	244	1588374	0	6509.73	8040	3472	29407	2014	52.19
DF19.bin.59	67.02	0.36	Neural Network (Specific Model)	11	0.881	61936	328.671	1629640	0.46	1458	None	52	1629640	0	31339.2	61936	15260	148773	2013	46.19
DF19.bin.60	79.9	1.47	Neural Network (Specific Model)	11	0.889	11260	283.811	2079568	0.49	2175	None	256	2079568	0	8123.31	11260	3557	49926	2001	48.85
DF19.bin.62	82.35	1.42	Gradient Boost (General Model)	11	0.905	47184	327.851	2446961	0.43	2256	None	81	2446961	0	30209.4	47184	19315	154477	2061	43.31
DF19.bin.65	67.58	0.57	Gradient Boost (General Model)	11	0.86	4450	258.67	2042390	0.43	2268	None	496	2042390	0	4117.72	4450	2429	17616	2006	43.13
DF19.bin.68	89.47	1.62	Neural Network (Specific Model)	11	0.899	33614	317.152	2329744	0.48	2205	None	141	2329744	0	16523	33614	7669	128598	2082	47.7
DF19.bin.70	99.7	0	Neural Network (Specific Model)	11	0.899	56894	320.52	2385728	0.54	2235	None	70	2385728	0	34081.8	56894	17916	130756	2282	53.52
DF19.bin.72	88.76	0.42	Gradient Boost (General Model)	11	0.885	8879	263.91	890828	0.47	998	None	131	890828	0	6800.21	8879	3516	27722	2051	46.71
DF19.bin.87	75.37	0.01	Neural Network (Specific Model)	11	0.915	101358	353.413	1970454	0.45	1703	None	55	1970454	0	35826.4	101358	15105	397216	2373	44.56
DF2.bin.1	91.18	0.41	Gradient Boost (General Model)	11	0.876	56455	315.186	3021666	0.43	2804	None	103	3021666	0	29336.6	56455	12810	147151	2353	43.34
DF2.bin.107	68.45	0.35	Gradient Boost (General Model)	11	0.925	12546	333.302	1149594	0.63	1065	None	133	1149594	0	8643.56	12546	3694	69866	2032	62.6
DF2.bin.114	80.72	1.21	Gradient Boost (General Model)	11	0.875	6022	277.14	1934434	0.55	2043	None	374	1934434	0	5172.28	6022	2821	23620	2023	55.47
DF2.bin.115	68.85	3.21	Gradient Boost (General Model)	11	0.935	4564	292.085	1352540	0.47	1446	None	312	1352540	0	4335.06	4564	2555	16471	2010	46.73
DF2.bin.117	69.12	0.29	Neural Network (Specific Model)	11	0.877	52754	338.743	1569634	0.47	1357	None	53	1569634	0	29615.7	52754	13621	99130	2006	47.13
DF2.bin.2	74.5	3.09	Gradient Boost (General Model)	11	0.923	6065	322.634	1695218	0.53	1619	None	321	1695218	0	5281.05	6065	2869	22002	2002	53.09
DF2.bin.22	71.15	3.52	Neural Network (Specific Model)	11	0.911	5853	315.357	2165843	0.46	2088	None	428	2165843	0	5060.38	5853	2747	19069	2034	46.01
DF2.bin.26	99.94	0.15	Neural Network (Specific Model)	11	0.914	80553	322.692	2519315	0.54	2386	None	51	2519315	0	49398.3	80553	26953	197124	2977	54.23
DF2.bin.27	58.4	0.02	Gradient Boost (General Model)	11	0.942	3943	302.215	923893	0.53	961	None	240	923893	0	3849.55	3943	2297	12391	2014	52.55
DF2.bin.31	89.21	0.44	Gradient Boost (General Model)	11	0.941	8688	343.545	1433367	0.53	1311	None	206	1433367	0	6958.09	8688	3391	28866	2019	53.38
DF2.bin.32	75.39	3.63	Gradient Boost (General Model)	11	0.879	6290	274.595	1966588	0.58	2102	None	375	1966588	0	5244.23	6290	2694	22967	2008	57.82
DF2.bin.40	81.44	2.91	Gradient Boost (General Model)	11	0.91	10638	313.777	1593996	0.47	1543	None	195	1593996	0	8174.34	10638	3756	50524	2004	46.9
DF2.bin.41	95.42	1.94	Gradient Boost (General Model)	11	0.892	13418	288.506	2719746	0.5	2812	None	321	2719746	0	8472.73	13418	3303	65712	2000	49.81
DF2.bin.60	71.22	3.62	Neural Network (Specific Model)	11	0.922	6253	295.9	1987549	0.51	2067	None	392	1987549	0	5070.28	6253	2736	18884	2001	50.63
DF2.bin.70	87.53	3.61	Neural Network (Specific Model)	11	0.913	7028	311	2109974	0.49	2069	None	363	2109974	0	5812.6	7028	3058	23268	2008	49.22
DF2.bin.74	86.54	1.49	Gradient Boost (General Model)	11	0.896	33036	325.341	2230455	0.45	2051	None	124	2230455	0	17987.5	33036	7641	96054	2114	45.07
DF2.bin.77	84.74	2.67	Neural Network (Specific Model)	11	0.913	9290	310.316	1637922	0.5	1609	None	229	1637922	0	7152.5	9290	3425	39831	2024	49.91
DF2.bin.79	97.31	1.64	Neural Network (Specific Model)	11	0.867	22664	295.499	2680321	0.46	2627	None	150	2680321	0	17868.8	22664	8966	136343	2050	45.84
DF2.bin.84	85.07	0.21	Neural Network (Specific Model)	11	0.92	14162	342.667	2074268	0.45	1858	None	211	2074268	0	9830.65	14162	4576	45129	2008	44.97
DF2.bin.92	74.73	4.54	Gradient Boost (General Model)	11	0.896	24629	308.975	2174214	0.63	2104	None	145	2174214	0	14994.6	24629	7411	122571	2014	62.96
DF2.bin.98	59.22	1.29	Gradient Boost (General Model)	11	0.922	5091	281.55	953295	0.52	1043	None	202	953295	0	4719.28	5091	2605	21540	2029	52.23
DF20.bin.1	76.57	3.09	Neural Network (Specific Model)	11	0.912	13937	330.667	1914385	0.46	1763	None	200	1914385	0	9571.92	13937	4572	56315	2031	45.7
DF20.bin.21	56.93	0.31	Gradient Boost (General Model)	11	0.905	4934	306.265	1629378	0.5	1607	None	358	1629378	0	4551.33	4934	2576	21419	2006	50.29
DF20.bin.26	78.06	3.35	Neural Network (Specific Model)	11	0.858	14548	292.618	2126806	0.41	2083	None	224	2126806	0	9494.67	14548	4045	56043	2034	40.67
DF20.bin.32	90.2	2.77	Gradient Boost (General Model)	11	0.943	13434	364.143	1653023	0.53	1429	None	174	1653023	0	9500.13	13434	4484	33620	2007	53.15
DF20.bin.39	58.57	0.05	Gradient Boost (General Model)	11	0.924	5090	286.542	1209450	0.63	1303	None	257	1209450	0	4706.03	5090	2534	25314	2003	63.38
DF20.bin.43	57.53	1.11	Gradient Boost (General Model)	11	0.912	5972	290.877	1145558	0.61	1199	None	229	1145558	0	5002.44	5972	2532	25161	2003	60.89
DF20.bin.45	99.23	0.38	Gradient Boost (General Model)	11	0.901	68053	340.485	2489717	0.36	2200	None	67	2489717	0	37160	68053	19817	380250	2226	36.09
DF20.bin.47	89.06	1.89	Gradient Boost (General Model)	11	0.877	7150	292.605	2273889	0.61	2277	None	388	2273889	0	5860.54	7150	2909	35439	2018	61.01
DF20.bin.48	88.46	2.39	Gradient Boost (General Model)	11	0.889	23889	311.122	2254811	0.62	2151	None	142	2254811	0	15879	23889	8067	76838	2010	61.8
DF20.bin.5	99.38	0.22	Gradient Boost (General Model)	11	0.892	67663	326.99	3302487	0.43	3007	None	72	3302487	0	45867.9	67663	22243	366844	2600	43.22
DF20.bin.50	74.2	1.95	Gradient Boost (General Model)	11	0.924	10062	329.372	1919679	0.48	1798	None	245	1919679	0	7835.42	10062	3796	43353	2016	47.81
DF20.bin.62	82.98	1.08	Neural Network (Specific Model)	11	0.899	11158	301.376	2244506	0.66	2235	None	272	2244506	0	8251.86	11158	3682	76727	2020	65.92
DF20.bin.65	81.07	0.81	Gradient Boost (General Model)	11	0.869	27094	308.71	3087062	0.44	2901	None	196	3087062	0	15750.3	27094	7496	95594	2040	43.8
DF20.bin.77	61.36	0.81	Gradient Boost (General Model)	11	0.916	14667	319.728	988180	0.64	945	None	107	988180	0	9235.33	14667	3910	104229	2001	63.59
DF3.bin.15	63.43	2.34	Neural Network (Specific Model)	11	0.909	5183	307.93	1665973	0.48	1641	None	370	1665973	0	4502.63	5183	2468	23721	2006	47.96
DF3.bin.19	95.44	0	Gradient Boost (General Model)	11	0.881	46529	289.707	1011247	0.47	1026	None	36	1011247	0	28090.2	46529	16656	92717	3111	46.94
DF3.bin.28	80.9	2.25	Gradient Boost (General Model)	11	0.847	26071	278.154	1234681	0.29	1256	None	67	1234681	0	18428.1	26071	10251	77196	2379	29.34
DF3.bin.33	89.94	1.13	Neural Network (Specific Model)	11	0.934	50972	362.904	2129906	0.51	1832	None	61	2129906	0	34916.5	50972	17838	206945	2602	50.51
DF3.bin.36	60.25	1.54	Gradient Boost (General Model)	11	0.88	3666	256.721	1612757	0.53	1846	None	456	1612757	0	3536.75	3666	2268	10908	2002	53.45
DF3.bin.37	78.14	2.26	Neural Network (Specific Model)	11	0.901	9525	298.909	2159751	0.48	2174	None	299	2159751	0	7223.25	9525	3528	32543	2012	47.78
DF3.bin.4	61.4	0.19	Neural Network (Specific Model)	11	0.881	6034	266.507	2128090	0.46	2349	None	421	2128090	0	5054.85	6034	2554	31277	2011	45.74
DF3.bin.42	85.04	0.52	Gradient Boost (General Model)	11	0.921	39869	328.31	2317132	0.51	2171	None	97	2317132	0	23888	39869	13435	113662	2054	50.9
DF3.bin.43	99.42	0.2	Neural Network (Specific Model)	11	0.904	50535	353.457	2255999	0.47	1927	None	74	2255999	0	30486.5	50535	14981	168407	2132	46.64
DF3.bin.46	89.7	2.12	Gradient Boost (General Model)	11	0.921	15126	319.042	1559089	0.58	1503	None	151	1559089	0	10325.1	15126	4763	69361	2020	58.28
DF3.bin.47	88.83	1.4	Gradient Boost (General Model)	11	0.94	8733	349.403	1350038	0.53	1212	None	178	1350038	0	7584.48	8733	3950	31436	2024	53.45
DF3.bin.53	83.33	0.15	Neural Network (Specific Model)	11	0.871	20110	284.909	913580	0.46	933	None	64	913580	0	14274.7	20110	5609	114905	2037	46.1
DF3.bin.59	76.49	2.16	Neural Network (Specific Model)	11	0.917	8868	325.512	1839481	0.46	1729	None	259	1839481	0	7102.24	8868	3601	60276	2056	45.57
DF3.bin.63	61.82	0.13	Gradient Boost (General Model)	11	0.896	24144	330.754	956262	0.47	865	None	67	956262	0	14272.6	24144	6466	60153	2006	46.58
DF3.bin.79	77.12	3.08	Neural Network (Specific Model)	11	0.902	55084	343.943	2745738	0.44	2403	None	98	2745738	0	28017.7	55084	14494	183509	2168	43.52
DF3.bin.89	60.39	0.71	Neural Network (Specific Model)	11	0.906	5211	308.337	1360627	0.43	1335	None	288	1360627	0	4724.4	5211	2718	20940	2009	42.66
DF3.bin.90	82.83	1.87	Gradient Boost (General Model)	11	0.926	7711	306.344	1672850	0.57	1688	None	265	1672850	0	6312.64	7711	3274	25199	2000	56.56
DF3.bin.96	64.83	2.7	Gradient Boost (General Model)	11	0.891	4152	264.349	2109821	0.5	2378	None	545	2109821	0	3871.23	4152	2317	16924	2002	50.11
DF3.bin.98	78.55	3.05	Neural Network (Specific Model)	11	0.924	28306	337.147	2502294	0.49	2290	None	150	2502294	0	16682	28306	6919	131810	2020	49.07
DF4.bin.12	51.03	0.17	Gradient Boost (General Model)	11	0.912	22007	319.191	728488	0.46	695	None	55	728488	0	13245.2	22007	5592	40874	2004	45.77
DF4.bin.17	99.39	2.02	Gradient Boost (General Model)	11	0.866	20525	290.339	2698491	0.46	2688	None	218	2698491	0	12378.4	20525	5294	125622	2006	45.83
DF4.bin.3	51.78	0.28	Neural Network (Specific Model)	11	0.904	3837	290.707	1400675	0.47	1455	None	375	1400675	0	3735.13	3837	2309	15498	2012	47.24
DF4.bin.31	71.17	1.04	Gradient Boost (General Model)	11	0.924	4291	283.382	1243990	0.59	1354	None	304	1243990	0	4092.07	4291	2420	15001	2010	58.78
DF4.bin.33	95.51	0.06	Neural Network (Specific Model)	11	0.92	140220	367.817	3026261	0.51	2529	None	30	3026261	0	100875	140220	61659	408377	3739	50.58
DF4.bin.43	79.54	1.61	Neural Network (Specific Model)	11	0.88	22130	338.913	2214222	0.49	1919	None	143	2214222	0	15484.1	22130	7779	61044	2094	48.63
DF4.bin.55	98.45	2.85	Gradient Boost (General Model)	11	0.884	82771	314.832	3734759	0.41	3504	None	69	3734759	0	54126.9	82771	29430	243122	2198	40.98
DF4.bin.56	79.74	3.46	Neural Network (Specific Model)	11	0.911	21549	314.938	2472042	0.49	2386	None	195	2472042	0	12677.1	21549	5389	96493	2000	48.54
DF4.bin.58	98.58	0.36	Gradient Boost (General Model)	11	0.877	51685	324.748	1604904	0.45	1446	None	41	1604904	0	39144	51685	24316	230705	3058	45.22
DF4.bin.60	59.06	0.05	Neural Network (Specific Model)	11	0.899	73937	323.791	2042243	0.46	1894	None	44	2042243	0	46414.6	73937	21211	161104	3058	45.89
DF4.bin.66	58.26	0.38	Neural Network (Specific Model)	11	0.91	18354	378.618	1760361	0.51	1412	None	126	1760361	0	13971.1	18354	7572	52203	2016	50.65
DF4.bin.67	64.65	1.46	Neural Network (Specific Model)	11	0.913	6820	289.864	1934887	0.44	2035	None	358	1934887	0	5404.71	6820	2765	24153	2015	43.57
DF4.bin.71	64.91	0.24	Neural Network (Specific Model)	11	0.947	8278	328.207	1139084	0.54	1097	None	173	1139084	0	6584.3	8278	3398	30261	2037	54.01
DF4.bin.81	79.56	1.21	Neural Network (Specific Model)	11	0.917	34967	334.017	2511551	0.47	2302	None	121	2511551	0	20756.6	34967	13428	81755	2055	46.92
DF5.bin.14	92.59	0.5	Gradient Boost (General Model)	11	0.884	65728	299.627	2537029	0.53	2498	None	58	2537029	0	43741.9	65728	19273	207478	5124	52.7
DF5.bin.18	97	0.1	Gradient Boost (General Model)	11	0.887	82753	314.239	1730210	0.4	1630	None	33	1730210	0	52430.6	82753	36123	147856	5288	39.58
DF5.bin.20	82.77	1.91	Gradient Boost (General Model)	11	0.921	12373	309.785	1475802	0.58	1465	None	174	1475802	0	8481.62	12373	3982	69572	2023	58.11
DF5.bin.21	68.24	0.13	Neural Network (Specific Model)	11	0.907	105500	358.46	1430916	0.43	1209	None	21	1430916	0	68138.9	105500	37367	167160	3757	43.41
DF5.bin.23	82.09	3.06	Gradient Boost (General Model)	11	0.942	7797	323.991	1765159	0.49	1715	None	284	1765159	0	6215.35	7797	3170	28990	2009	48.96
DF5.bin.24	71.32	1.52	Gradient Boost (General Model)	11	0.865	9091	288.486	2768350	0.6	2771	None	393	2768350	0	7044.15	9091	3275	37959	2003	60.05
DF5.bin.27	61.12	1.42	Neural Network (Specific Model)	11	0.913	4690	295.131	1542631	0.49	1593	None	359	1542631	0	4297.02	4690	2540	16839	2009	49.26
DF5.bin.28	82.32	0.6	Gradient Boost (General Model)	11	0.919	13525	338.187	2025644	0.44	1837	None	200	2025644	0	10128.2	13525	5165	46026	2007	44.14
DF5.bin.32	81.27	4.93	Gradient Boost (General Model)	11	0.888	39289	303.049	4327714	0.43	4235	None	243	4327714	0	17809.5	39289	6627	168376	2019	42.5
DF5.bin.36	87.76	1.9	Neural Network (Specific Model)	11	0.865	54871	330.256	2729038	0.4	2386	None	90	2729038	0	30322.6	54871	15136	152753	2108	40.16
DF5.bin.49	81.28	0.18	Neural Network (Specific Model)	11	0.922	33865	348.107	2883191	0.44	2551	None	149	2883191	0	19350.3	33865	8965	93549	2016	43.85
DF5.bin.57	91.74	4.65	Gradient Boost (General Model)	11	0.874	6210	277.166	2198212	0.54	2314	None	415	2198212	0	5296.9	6210	2703	22485	2002	53.7
DF5.bin.61	70.74	0.13	Gradient Boost (General Model)	11	0.912	92001	378.013	1387617	0.54	1117	None	31	1387617	0	44761.8	92001	21316	194551	3600	53.55
DF5.bin.64	75.23	2.55	Neural Network (Specific Model)	11	0.898	93836	333.035	2586271	0.5	2329	None	44	2586271	0	58778.9	93836	32297	201821	2161	49.78
DF5.bin.65	85.76	0.01	Neural Network (Specific Model)	11	0.902	47233	297.508	1465735	0.33	1483	None	72	1465735	0	20357.4	47233	7903	98288	2256	33.06
DF5.bin.7	91.39	1.64	Gradient Boost (General Model)	11	0.889	23397	312.477	2400728	0.62	2281	None	146	2400728	0	16443.3	23397	7632	76919	2127	61.64
DF5.bin.71	58.91	0.01	Neural Network (Specific Model)	11	0.926	4706	261.28	1148282	0.37	1360	None	271	1148282	0	4237.2	4706	2437	23271	2001	36.81
DF5.bin.82	61.77	0.37	Neural Network (Specific Model)	11	0.926	43886	343.15	1666940	0.52	1502	None	66	1666940	0	25256.7	43886	12254	94910	2296	52.04
DF5.bin.87	62.59	0.83	Gradient Boost (General Model)	11	0.89	5170	288.862	1416764	0.55	1458	None	297	1416764	0	4770.25	5170	2622	35720	2029	55.06
DF5.bin.93	79.3	0.6	Neural Network (Specific Model)	11	0.881	85433	332.296	2609415	0.42	2309	None	44	2609415	0	59304.9	85433	33880	200697	2753	42.46
DF5.bin.97	99.21	1.57	Gradient Boost (General Model)	11	0.886	31070	291.468	2363817	0.49	2398	None	124	2363817	0	19063	31070	8481	85316	2007	48.71
DF6.bin.1	95.79	2.55	Gradient Boost (General Model)	11	0.837	78337	319.744	1492420	0.46	1304	None	28	1492420	0	53300.7	78337	26529	194440	8059	46.12
DF6.bin.17	86.2	1.54	Gradient Boost (General Model)	11	0.929	45278	346.237	1399954	0.51	1254	None	48	1399954	0	29165.7	45278	13031	118852	2471	50.52
DF6.bin.19	70.2	2.26	Gradient Boost (General Model)	11	0.929	8769	334.74	1802838	0.54	1672	None	261	1802838	0	6907.43	8769	3651	32424	2007	53.9
DF6.bin.25	79.02	0.22	Gradient Boost (General Model)	11	0.943	8787	329.794	1457011	0.58	1391	None	223	1457011	0	6533.68	8787	3164	25671	2016	58.27
DF6.bin.27	93.19	1.11	Gradient Boost (General Model)	11	0.94	8322	336.265	1231298	0.53	1149	None	187	1231298	0	6584.48	8322	3207	22660	2052	53.38
DF6.bin.29	81.64	2.68	Gradient Boost (General Model)	11	0.898	23568	303.566	2651253	0.61	2617	None	188	2651253	0	14102.4	23568	6490	119052	2002	60.95
DF6.bin.31	84.62	4.85	Neural Network (Specific Model)	11	0.904	8428	296	3539545	0.43	3609	None	538	3539545	0	6579.08	8428	3134	68832	2034	43.23
DF6.bin.33	80.02	1.13	Gradient Boost (General Model)	11	0.912	10661	317.854	1466223	0.45	1404	None	198	1466223	0	7405.17	10661	3529	48218	2002	45.22
DF6.bin.34	77.26	4.37	Gradient Boost (General Model)	11	0.895	5397	288.821	1229737	0.54	1272	None	254	1229737	0	4841.48	5397	2566	22400	2012	53.84
DF6.bin.35	94.59	0.01	Gradient Boost (General Model)	11	0.858	36808	317.207	2600003	0.53	2347	None	98	2600003	0	26530.6	36808	15594	207709	2028	53.27
DF6.bin.4	98.2	0.24	Neural Network (Specific Model)	11	0.94	27565	348.929	2055113	0.51	1850	None	106	2055113	0	19387.9	27565	9450	90943	2550	51.13
DF6.bin.42	81.64	1.28	Gradient Boost (General Model)	11	0.894	6680	297.026	1504349	0.61	1512	None	274	1504349	0	5490.32	6680	2804	28065	2006	61.22
DF6.bin.44	83.39	1.04	Neural Network (Specific Model)	11	0.91	92969	366.473	2323339	0.47	1925	None	55	2323339	0	42242.5	92969	19673	254510	2011	47.37
DF6.bin.54	81.35	4.56	Gradient Boost (General Model)	11	0.893	32347	295.894	2003856	0.53	2019	None	105	2003856	0	19084.3	32347	8447	78478	2175	53.16
DF6.bin.56	90.48	0.54	Gradient Boost (General Model)	11	0.913	9571	327.435	1295612	0.43	1206	None	179	1295612	0	7238.06	9571	3424	43578	2032	42.8
DF6.bin.6	66.85	1.2	Neural Network (Specific Model)	11	0.931	18812	334.703	1712023	0.53	1590	None	110	1712023	0	15563.9	18812	8765	77888	2094	52.5
DF6.bin.63	98.57	1.12	Gradient Boost (General Model)	11	0.874	30166	324.351	3965159	0.5	3568	None	186	3965159	0	21318.1	30166	10353	99371	2050	49.91
DF6.bin.65	54.71	0.64	Neural Network (Specific Model)	11	0.908	31138	319.892	1718793	0.44	1629	None	77	1718793	0	22322	31138	14829	92607	2117	43.9
DF6.bin.7	93.66	2.75	Gradient Boost (General Model)	11	0.885	7730	306.555	1856155	0.48	1790	None	300	1856155	0	6187.18	7730	3022	25901	2026	48.24
DF6.bin.77	82.51	0.2	Neural Network (Specific Model)	11	0.882	49509	329.535	2729157	0.46	2439	None	90	2729157	0	30324	49509	16418	103188	2305	46.16
DF6.bin.78	100	0.15	Gradient Boost (General Model)	11	0.874	118320	318.59	2726867	0.53	2496	None	35	2726867	0	77910.5	118320	40458	276261	2126	52.57
DF6.bin.90	78.86	4.21	Gradient Boost (General Model)	11	0.906	11375	302.671	2765983	0.47	2764	None	332	2765983	0	8331.27	11375	3795	65966	2005	47.36
DF6.bin.95	92.42	0.03	Neural Network (Specific Model)	11	0.877	93372	331.607	1975853	0.46	1745	None	34	1975853	0	58113.3	93372	27080	170713	2000	46.47
DF6.bin.98	53.98	0	Neural Network (Specific Model)	11	0.876	57323	304.817	1803443	0.46	1731	None	50	1803443	0	36068.9	57323	24250	116197	2405	46.11
DF7.bin.103	94.76	0.1	Gradient Boost (General Model)	11	0.924	299393	351.399	942163	0.46	828	None	3	942163	0	314054	299393	271816	370954	271816	45.98
DF7.bin.106	84.28	0.53	Gradient Boost (General Model)	11	0.943	10494	349.416	1841398	0.57	1659	None	235	1841398	0	7835.74	10494	3649	31891	2003	57.27
DF7.bin.11	65.67	0.02	Neural Network (Specific Model)	11	0.922	98331	370.531	761813	0.46	633	None	11	761813	0	69255.7	98331	37646	162438	12986	45.92
DF7.bin.126	90.67	0.52	Gradient Boost (General Model)	11	0.946	7637	326.254	1222119	0.54	1183	Low confidence prediction _ substantial (27%) disagreement between completeness prediction models	193	1222119	0	6332.22	7637	3276	33893	2070	53.7
DF7.bin.13	80.06	1.71	Neural Network (Specific Model)	11	0.927	15616	330.264	2408867	0.5	2258	None	228	2408867	0	10565.2	15616	4543	106885	2012	49.8
DF7.bin.16	81.71	4.36	Gradient Boost (General Model)	11	0.908	5299	292.492	1348304	0.49	1397	None	279	1348304	0	4832.63	5299	2627	27102	2004	49.28
DF7.bin.17	97.55	1.44	Gradient Boost (General Model)	11	0.891	22093	306.38	3038404	0.45	2950	None	222	3038404	0	13686.5	22093	6210	141053	2019	44.79
DF7.bin.19	63.01	0.05	Neural Network (Specific Model)	11	0.918	76512	379.099	1796774	0.52	1453	None	33	1796774	0	54447.7	76512	31849	132809	5078	52.34
DF7.bin.21	81.47	0.57	Neural Network (Specific Model)	11	0.876	12606	282.151	1980403	0.33	2052	None	233	1980403	0	8499.58	12606	3757	39991	2006	33.16
DF7.bin.24	73.61	1.79	Gradient Boost (General Model)	11	0.899	11121	339.199	2248750	0.51	1990	None	279	2248750	0	8060.04	11121	3837	43551	2021	51.17
DF7.bin.29	73.17	3.11	Neural Network (Specific Model)	11	0.889	7478	286.615	1487095	0.39	1540	None	262	1487095	0	5675.94	7478	2733	30033	2005	39.46
DF7.bin.30	86.94	2	Neural Network (Specific Model)	11	0.87	19816	307.653	2377466	0.54	2245	None	173	2377466	0	13742.6	19816	6680	76060	2045	53.88
DF7.bin.38	91.25	1.49	Neural Network (Specific Model)	11	0.927	77305	359.285	2385532	0.5	2056	None	51	2385532	0	46775.1	77305	20918	303498	2086	50.39
DF7.bin.5	97.65	0.12	Gradient Boost (General Model)	11	0.894	220029	319.087	2064928	0.41	1932	None	24	2064928	0	86038.7	220029	35965	647883	3245	40.59
DF7.bin.51	60.29	1.81	Gradient Boost (General Model)	11	0.91	3780	279.122	1186142	0.48	1291	None	317	1186142	0	3741.77	3780	2339	15118	2000	48.1
DF7.bin.56	98	0.63	Neural Network (Specific Model)	11	0.911	42766	358.173	3122425	0.49	2652	None	119	3122425	0	26238.9	42766	13798	107725	2167	48.73
DF7.bin.60	80.52	0.35	Gradient Boost (General Model)	11	0.845	12073	288.153	1200369	0.41	1176	None	136	1200369	0	8826.24	12073	4209	33324	2019	40.75
DF7.bin.68	96.24	0.33	Gradient Boost (General Model)	11	0.902	21583	307.901	966817	0.41	946	None	57	966817	0	16961.7	21583	9070	72962	2257	40.89
DF7.bin.71	79.44	1.41	Gradient Boost (General Model)	11	0.899	27075	315.798	1496006	0.6	1421	None	84	1496006	0	17809.6	27075	7800	148809	2043	60.21
DF7.bin.73	88.08	4.68	Gradient Boost (General Model)	11	0.91	7309	301.331	1509317	0.56	1521	None	249	1509317	0	6061.51	7309	2904	35269	2012	56.14
DF7.bin.77	58.29	0.2	Neural Network (Specific Model)	11	0.887	3953	281.244	1455338	0.27	1532	None	384	1455338	0	3789.94	3953	2375	15900	2015	27.33
DF7.bin.81	91.31	0.58	Gradient Boost (General Model)	11	0.888	26872	271.373	1413936	0.28	1546	None	87	1413936	0	16252.1	26872	7227	73459	2201	27.89
DF7.bin.82	93.01	2.27	Gradient Boost (General Model)	11	0.873	11040	296.864	2346472	0.54	2305	None	289	2346472	0	8119.28	11040	3655	42886	2026	53.95
DF7.bin.84	90.59	0.23	Neural Network (Specific Model)	11	0.876	262239	303.802	1244045	0.31	1198	None	8	1244045	0	155506	262239	125898	381242	5400	31.3
DF7.bin.87	93.2	0.05	Gradient Boost (General Model)	11	0.783	37213	312.15	1236670	0.46	1036	None	49	1236670	0	25238.2	37213	12447	97742	2194	45.65
DF7.bin.9	93.54	0.05	Gradient Boost (General Model)	11	0.915	183204	332.724	894612	0.39	822	None	6	894612	0	149102	183204	128788	400013	2827	39.34
DF7.bin.90	92.86	0.07	Gradient Boost (General Model)	11	0.854	32337	284.959	1259175	0.4	1262	None	86	1259175	0	14641.6	32337	5454	75399	2004	39.65
DF7.bin.91	61.75	0.73	Neural Network (Specific Model)	11	0.906	24886	373.016	2257135	0.46	1830	None	140	2257135	0	16122.4	24886	7311	153704	2007	46.18
DF7.bin.93	97.4	0.06	Gradient Boost (General Model)	11	0.879	73640	317.199	2737572	0.52	2534	None	47	2737572	0	58246.2	73640	32391	254731	3738	52.42
DF7.bin.96	83.72	0.1	Neural Network (Specific Model)	11	0.91	406109	370.069	2255875	0.52	1852	None	9	2255875	0	250653	406109	136830	432545	54623	52.23
DF7.bin.97	96.06	0.25	Gradient Boost (General Model)	11	0.914	143094	324.896	2147823	0.57	2017	None	25	2147823	0	85912.9	143094	51164	271349	2238	57.21
DF7.bin.99	99.11	0	Gradient Boost (General Model)	11	0.9	20204	311.398	1289638	0.43	1245	None	85	1289638	0	15172.2	20204	7946	58254	2441	43.05
DF8.bin.11	89.02	3.39	Neural Network (Specific Model)	11	0.88	89061	309.958	2332689	0.52	2211	None	47	2332689	0	49631.7	89061	26635	149601	2005	51.57
DF8.bin.14	74.74	0.01	Neural Network (Specific Model)	11	0.897	107371	324.855	1403091	0.52	1293	None	18	1403091	0	77949.5	107371	40591	185805	4618	52.29
DF8.bin.2	93.14	2.51	Neural Network (Specific Model)	11	0.865	49059	332.241	2805673	0.4	2440	None	105	2805673	0	26720.7	49059	11983	164617	2020	40.45
DF8.bin.35	84.28	0.91	Neural Network (Specific Model)	11	0.876	11183	273.222	2344230	0.49	2511	None	266	2344230	0	8812.89	11183	4179	49019	2005	48.99
DF8.bin.39	90.19	2.54	Neural Network (Specific Model)	11	0.894	21533	310.424	2453128	0.48	2359	None	178	2453128	0	13781.6	21533	5928	72683	2030	47.72
DF8.bin.44	70.98	0.04	Neural Network (Specific Model)	11	0.945	8180	333.74	1185465	0.54	1121	None	179	1185465	0	6622.71	8180	3543	23707	2060	53.74
DF8.bin.51	68.39	0.35	Neural Network (Specific Model)	11	0.923	60589	338.143	1923526	0.51	1754	None	47	1923526	0	40926.1	60589	26418	125076	2529	51.07
DF8.bin.68	95.11	4.42	Neural Network (Specific Model)	11	0.886	24307	273.884	2656599	0.49	2869	None	183	2656599	0	14516.9	24307	6029	119702	2004	48.68
DF8.bin.69	82.83	1.2	Neural Network (Specific Model)	11	0.877	28773	325.457	2191679	0.54	1971	None	117	2191679	0	18732.3	28773	9368	76993	2377	53.88
DF8.bin.72	97.67	0.6	Gradient Boost (General Model)	11	0.909	50430	310.729	1807758	0.41	1765	None	65	1807758	0	27811.7	50430	12372	226640	2035	41.18
DF8.bin.82	83.18	0	Neural Network (Specific Model)	11	0.897	27219	345.578	2513745	0.49	2179	None	151	2513745	0	16647.3	27219	7698	63366	2163	49.5
DF8.bin.87	70.56	0.22	Gradient Boost (General Model)	11	0.94	5822	318.317	1367934	0.58	1349	None	267	1367934	0	5123.35	5822	2699	19756	2004	57.8
DF9.bin.100	78.85	0.66	Neural Network (Specific Model)	11	0.897	7457	280.457	2168984	0.66	2317	None	374	2168984	0	5799.42	7457	2795	28223	2005	65.95
DF9.bin.106	61.21	0.47	Gradient Boost (General Model)	11	0.917	3778	260.701	440475	0.4	518	None	121	440475	0	3640.29	3778	2439	11705	2013	39.8
DF9.bin.107	97.31	0.16	Gradient Boost (General Model)	11	0.882	24910	315.488	1848115	0.48	1724	None	105	1848115	0	17601.1	24910	9340	84849	2049	47.58
DF9.bin.19	96.2	4.71	Gradient Boost (General Model)	11	0.899	37170	326.6	3968103	0.5	3647	None	162	3968103	0	24494.5	37170	13432	100286	2110	49.93
DF9.bin.24	66.73	1.84	Neural Network (Specific Model)	11	0.923	4776	295.814	1412842	0.49	1472	None	317	1412842	0	4456.92	4776	2468	19566	2013	49.23
DF9.bin.27	67.15	0.55	Gradient Boost (General Model)	11	0.901	6520	294.58	1169959	0.61	1195	None	221	1169959	0	5293.93	6520	2683	28032	2046	61.06
DF9.bin.28	81.46	0.68	Neural Network (Specific Model)	11	0.905	34692	360.903	2162912	0.53	1810	None	88	2162912	0	24578.5	34692	12328	124683	2378	52.75
DF9.bin.3	93.9	1.3	Neural Network (Specific Model)	11	0.915	16519	337.338	2361908	0.45	2139	None	204	2361908	0	11578	16519	5884	54082	2012	44.81
DF9.bin.36	67.18	0.5	Neural Network (Specific Model)	11	0.918	8456	305.137	1578720	0.44	1587	None	236	1578720	0	6689.49	8456	3404	42752	2024	43.99
DF9.bin.39	72.37	1.41	Gradient Boost (General Model)	11	0.923	13849	338.342	1405748	0.5	1280	None	161	1405748	0	8731.35	13849	3843	44910	2042	49.73
DF9.bin.44	99.46	0.92	Neural Network (Specific Model)	11	0.893	95767	332.277	2672572	0.65	2397	None	52	2672572	0	51395.6	95767	24803	257061	2185	65.12
DF9.bin.55	97.32	0.05	Gradient Boost (General Model)	11	0.94	115890	402.622	1986635	0.57	1548	None	28	1986635	0	70951.2	115890	33396	198837	3262	56.81
DF9.bin.56	85.9	4.16	Gradient Boost (General Model)	11	0.891	11560	283.589	2207801	0.61	2315	None	269	2207801	0	8207.44	11560	3923	47645	2022	61
DF9.bin.66	59.7	1.52	Neural Network (Specific Model)	11	0.921	4240	262.819	1077184	0.51	1262	None	271	1077184	0	3974.85	4240	2319	15608	2019	50.6
DF9.bin.71	63.74	0.63	Neural Network (Specific Model)	11	0.945	7367	335.795	1118370	0.54	1050	None	188	1118370	0	5948.78	7367	2909	30274	2003	53.93
DF9.bin.72	76.47	0	Gradient Boost (General Model)	11	0.916	48165	356.988	2167320	0.46	1857	None	59	2167320	0	36734.2	48165	19316	133006	2025	46.15
DF9.bin.78	95.18	1.47	Gradient Boost (General Model)	11	0.94	11219	345.302	1753197	0.52	1593	None	208	1753197	0	8428.83	11219	4280	30114	2027	52.04
DF9.bin.95	85.06	1.61	Neural Network (Specific Model)	11	0.912	21939	329.362	3046166	0.49	2818	None	251	3046166	0	12136.1	21939	4824	71558	2000	48.92
DF9.bin.97	69.7	0.93	Neural Network (Specific Model)	11	0.923	22216	367.439	1951677	0.53	1637	None	125	1951677	0	15613.4	22216	7545	65594	2304	52.75
DF9.bin.98	78.24	1.92	Neural Network (Specific Model)	11	0.947	5752	314.097	1630655	0.52	1643	None	317	1630655	0	5144.02	5752	2778	34082	2004	51.65
DX10	100	0.13	Neural Network (Specific Model)	11	0.861	242215	286.889	2640321	0.35	2645	None	152	2640321	0	17370.5	242215	41176	524433	100	34.75
DX11	100	0.14	Neural Network (Specific Model)	11	0.855	1200309	279.357	4688699	0.4	4789	None	88	4688699	0	53280.7	1200309	130212	1207177	100	40.09
DX23	100	0.24	Neural Network (Specific Model)	11	0.875	153506	300.948	2878693	0.37	2794	None	137	2878693	0	21012.4	153506	34064	369959	100	37.47
DX29	99.58	0.58	Neural Network (Specific Model)	11	0.869	212831	290.084	3195998	0.46	3197	None	95	3195998	0	33642.1	212831	74349	364991	100	46.17
DX40	100	0.05	Neural Network (Specific Model)	11	0.853	285452	284.054	4241994	0.45	4255	None	94	4241994	0	45127.6	285452	64346	751430	100	44.82
DX45	100	0.1	Neural Network (Specific Model)	11	0.869	190077	284.068	4398686	0.49	4493	None	81	4398686	0	54304.8	190077	54962	846627	100	48.6
DX74	100	0.03	Neural Network (Specific Model)	11	0.895	229428	326.931	4665877	0.56	4264	None	77	4665877	0	60595.8	229428	111406	680611	100	56.09
DY14	100	0.02	Neural Network (Specific Model)	11	0.882	932455	318	5216792	0.58	4831	None	85	5216792	0	61374	932455	107786	1966888	103	57.91
DY22	99.99	0.23	Neural Network (Specific Model)	11	0.883	381164	315.93	2762167	0.37	2577	None	26	2762167	0	106237	381164	219509	1223140	101	37.45
DY30	100	0.02	Neural Network (Specific Model)	11	0.894	813462	319.832	4762010	0.56	4446	None	55	4762010	0	86582	813462	163169	1938465	105	55.75
DY41	100	0.16	Neural Network (Specific Model)	11	0.883	220959	319.833	5185579	0.51	4783	None	120	5185579	0	43213.2	220959	64728	1112013	100	50.53
DY44	100	0.07	Neural Network (Specific Model)	11	0.879	598368	314.001	5584457	0.57	5221	None	76	5584457	0	73479.7	598368	132642	1054277	100	57.26
DY57	99.99	0.2	Neural Network (Specific Model)	11	0.885	584609	321.206	2696079	0.38	2480	None	22	2696079	0	122549	584609	148045	855685	164	37.66
DY58	100	0.02	Neural Network (Specific Model)	11	0.836	575725	279.564	5704176	0.35	5694	None	140	5704176	0	40744.1	575725	64823	905024	100	34.85
DY59	100	0.94	Neural Network (Specific Model)	11	0.879	444367	320.016	5368164	0.56	4922	None	75	5368164	0	71575.5	444367	109288	841219	101	55.96
DY60	100	0.17	Neural Network (Specific Model)	11	0.847	156084	293.365	3366430	0.38	3246	None	109	3366430	0	30884.7	156084	44066	353076	100	37.87
DY64	100	0.01	Neural Network (Specific Model)	11	0.884	477797	290.277	3715303	0.41	3780	None	37	3715303	0	100414	477797	93376	862756	103	41.33
DY66	100	0.13	Neural Network (Specific Model)	11	0.845	271078	267.86	5705149	0.35	6007	None	419	5705149	0	13616.1	271078	47880	623479	100	35.08
DY71	100	0.88	Neural Network (Specific Model)	11	0.876	120229	307.158	5551395	0.55	5286	None	243	5551395	0	22845.2	120229	34932	361429	100	54.58
DY72	100	0.01	Neural Network (Specific Model)	11	0.847	115433	298.398	3135128	0.38	2971	None	94	3135128	0	33352.4	115433	53336	614051	100	38.27
DY73	100	0.01	Neural Network (Specific Model)	11	0.883	259190	302.686	4966885	0.56	4840	None	389	4966885	0	12768.3	259190	73510	856378	100	55.61
ERR3357615.bin.12	86.01	0.43	Neural Network (Specific Model)	11	0.907	104448	362.733	1789880	0.6	1494	None	28	1789880	0	63924.3	104448	41982	194549	3979	59.69
ERR3357615.bin.15	98.39	0.01	Gradient Boost (General Model)	11	0.904	153129	327.288	2169752	0.43	2001	None	24	2169752	0	90406.3	153129	56045	312423	2094	43.31
ERR3357615.bin.19	57.78	0.79	Neural Network (Specific Model)	11	0.896	20450	332.2	2139876	0.43	1927	None	155	2139876	0	13805.6	20450	6661	74039	2310	43.24
ERR3357615.bin.21	97.41	0.21	Neural Network (Specific Model)	11	0.913	193183	313.984	1931741	0.34	1875	None	18	1931741	0	107319	193183	58249	248123	9376	34.2
ERR3357615.bin.26	80.1	0.6	Neural Network (Specific Model)	11	0.855	8615	275.604	2795761	0.31	2897	None	407	2795761	0	6869.19	8615	3123	74664	2015	30.62
ERR3357615.bin.30	80.93	3.85	Neural Network (Specific Model)	11	0.902	8626	300.044	3262039	0.47	3274	None	471	3262039	0	6925.77	8626	3353	41723	2004	46.65
ERR3357615.bin.31	55.56	0.23	Neural Network (Specific Model)	11	0.921	5032	265.751	1263979	0.39	1464	None	277	1263979	0	4563.1	5032	2464	21628	2010	38.53
ERR3357615.bin.33	96.25	0.31	Neural Network (Specific Model)	11	0.897	25596	338.153	2272606	0.53	2013	None	125	2272606	0	18180.8	25596	8007	140413	2156	52.7
ERR3357615.bin.35	80.1	4.26	Neural Network (Specific Model)	11	0.877	24948	340.895	1841323	0.63	1581	None	120	1841323	0	15344.4	24948	6492	128831	2051	63.4
ERR3357615.bin.38	74.47	0.35	Gradient Boost (General Model)	11	0.903	109584	316.789	1610398	0.38	1532	None	24	1610398	0	67099.9	109584	34013	248785	6313	37.68
ERR3357615.bin.46	92.95	0.71	Neural Network (Specific Model)	11	0.921	17949	344.994	2094981	0.55	1868	None	158	2094981	0	13259.4	17949	6524	74052	2008	55.41
ERR3357615.bin.47	65.95	0.02	Neural Network (Specific Model)	11	0.915	72350	342.798	1582255	0.5	1411	None	30	1582255	0	52741.8	72350	27549	174223	4772	50.43
ERR3357615.bin.55	68.19	0.06	Neural Network (Specific Model)	11	0.907	71989	344.894	1492934	0.54	1312	None	28	1492934	0	53319.1	71989	29569	197030	5353	53.89
ERR3357615.bin.60	74.01	0.5	Gradient Boost (General Model)	11	0.894	6058	276.504	1854005	0.63	2002	None	366	1854005	0	5065.59	6058	2635	19530	2001	63
ERR3357615.bin.63	96.37	0.68	Neural Network (Specific Model)	11	0.916	65014	303.401	1877416	0.34	1892	None	44	1877416	0	42668.6	65014	23975	179472	2307	34.44
ERR3357615.bin.69	87.81	0.23	Neural Network (Specific Model)	11	0.92	47795	364.063	2275556	0.49	1919	None	81	2275556	0	28093.3	47795	11646	95631	2188	49.27
ERR3357615.bin.72	80.83	0.11	Neural Network (Specific Model)	11	0.913	70417	361.252	1941670	0.46	1638	None	39	1941670	0	49786.4	70417	24478	288375	2809	45.79
ERR3357615.bin.94	90.34	1.35	Neural Network (Specific Model)	11	0.912	43834	355.983	4589518	0.45	3926	None	189	4589518	0	24283.2	43834	11153	158690	2010	44.76
ERR3357616.bin.19	83.8	0.04	Neural Network (Specific Model)	11	0.854	123082	355.466	1934479	0.61	1552	None	30	1934479	0	64482.6	123082	26367	229615	4105	60.66
ERR3357616.bin.26	76.74	1.3	Gradient Boost (General Model)	11	0.896	184916	331.857	3182499	0.47	2869	None	30	3182499	0	106083	184916	59208	351581	11604	46.91
ERR3357616.bin.29	57.61	0.16	Neural Network (Specific Model)	11	0.897	4753	267.905	2004301	0.46	2243	None	459	2004301	0	4366.67	4753	2513	23526	2021	46.22
ERR3357616.bin.3	84.15	0.01	Neural Network (Specific Model)	11	0.858	62760	302.144	2256675	0.36	2139	None	62	2256675	0	36398	62760	15814	214539	2529	36.48
ERR3357616.bin.40	97.19	1.18	Gradient Boost (General Model)	11	0.852	16908	286.395	2783176	0.62	2766	None	227	2783176	0	12260.7	16908	5709	58408	2043	61.6
ERR3357616.bin.50	74.53	0.1	Neural Network (Specific Model)	11	0.886	111236	327.025	2559355	0.46	2314	None	35	2559355	0	73124.4	111236	40956	262277	2078	45.74
ERR3357616.bin.51	82.24	0.26	Neural Network (Specific Model)	11	0.925	40625	301.142	1463498	0.39	1502	None	57	1463498	0	25675.4	40625	13742	116490	2020	39.47
ERR3357616.bin.53	98.55	0	Gradient Boost (General Model)	11	0.902	157174	322.213	2251733	0.43	2105	None	21	2251733	0	107225	157174	55639	336954	12883	43.32
ERR3357616.bin.58	92.12	0.21	Gradient Boost (General Model)	11	0.843	11901	307.688	1431688	0.34	1310	None	172	1431688	0	8323.77	11901	3837	70687	2013	33.9
ERR3357616.bin.64	95.63	1.36	Gradient Boost (General Model)	11	0.889	64856	304.944	4391780	0.49	4277	None	98	4391780	0	44814.1	64856	24915	199846	2247	48.58
ERR3357616.bin.65	98.96	1.68	Gradient Boost (General Model)	11	0.857	37869	322.843	3524054	0.35	3124	None	177	3524054	0	19909.9	37869	8645	109096	2069	35.11
ERR3357616.bin.74	77.31	2.32	Gradient Boost (General Model)	11	0.908	9472	293.707	2386899	0.49	2464	None	323	2386899	0	7389.78	9472	3530	39279	2023	49.11
ERR3357617.bin.20	68.29	1.51	Neural Network (Specific Model)	11	0.908	5169	285.186	2766109	0.52	2941	None	595	2766109	0	4648.92	5169	2511	49586	2003	51.91
ERR3357617.bin.22	90.94	3.96	Neural Network (Specific Model)	11	0.838	9700	286.313	2612095	0.43	2552	None	333	2612095	0	7844.13	9700	4054	33913	2066	43.39
ERR3357617.bin.27	81.85	1.54	Gradient Boost (General Model)	11	0.914	35707	325.475	3128132	0.46	2934	None	131	3128132	0	23878.9	35707	12704	110806	2124	46.2
ERR3357617.bin.3	66.02	0.05	Gradient Boost (General Model)	11	0.907	294044	318.087	1112724	0.34	1060	None	10	1112724	0	111272	294044	76323	331588	2034	34.32
ERR3357617.bin.32	92.15	1.2	Gradient Boost (General Model)	11	0.886	41040	310.869	2542514	0.62	2419	None	117	2542514	0	21730.9	41040	9499	135858	2038	62.44
ERR3357617.bin.38	96.13	0.46	Gradient Boost (General Model)	11	0.878	129750	324.444	3221752	0.48	2913	None	44	3221752	0	73221.6	129750	43339	272899	2588	47.91
ERR3357617.bin.42	97.15	0.01	Gradient Boost (General Model)	11	0.899	129224	337.235	3508821	0.46	3122	None	42	3508821	0	83543.4	129224	40978	256885	2667	45.92
ERR3357617.bin.7	94.31	1.13	Gradient Boost (General Model)	11	0.908	98270	375.177	2203177	0.55	1781	None	35	2203177	0	62947.9	98270	32441	182901	2984	54.86
ERR3357618.bin.10	97.44	0.15	Neural Network (Specific Model)	11	0.852	99931	346.956	2151745	0.6	1763	None	30	2151745	0	71724.8	99931	40478	330471	3914	60.29
ERR3357618.bin.20	94.59	3.57	Gradient Boost (General Model)	11	0.869	39708	301.215	4551529	0.39	4386	None	241	4551529	0	18886	39708	8018	208929	2028	39.21
ERR3357618.bin.22	93.94	2.12	Gradient Boost (General Model)	11	0.878	46188	322.243	4581264	0.46	4168	None	215	4581264	0	21308.2	46188	9792	161896	2010	45.58
ERR3357618.bin.34	65.52	0.94	Neural Network (Specific Model)	11	0.902	4855	284.65	1664168	0.44	1761	None	364	1664168	0	4571.89	4855	2584	25489	2001	44.39
ERR3357618.bin.36	88.12	1.12	Gradient Boost (General Model)	11	0.892	12352	288.883	2546804	0.58	2626	None	293	2546804	0	8692.16	12352	3602	88028	2001	57.59
ERR3357618.bin.43	79.23	3.79	Gradient Boost (General Model)	11	0.867	77199	325.199	3864542	0.45	3440	None	62	3864542	0	62331.3	77199	37587	329880	2577	44.79
ERR3357619.bin.13	79.23	0	Neural Network (Specific Model)	11	0.869	68621	346.904	2214773	0.49	1852	None	42	2214773	0	52732.7	68621	29733	191288	2492	48.61
ERR3357619.bin.14	64.76	1.42	Neural Network (Specific Model)	11	0.893	20665	347.052	2743381	0.42	2356	None	188	2743381	0	14592.5	20665	7171	86382	2038	41.94
ERR3357619.bin.19	85.96	0.64	Gradient Boost (General Model)	11	0.875	18002	303.799	2451343	0.64	2358	None	190	2451343	0	12901.8	18002	6325	76566	2000	63.67
ERR3357619.bin.20	95.41	0.17	Neural Network (Specific Model)	11	0.91	59168	358.685	2979532	0.47	2523	None	87	2979532	0	34247.5	59168	17040	208521	2001	46.82
ERR3357619.bin.32	89.49	2.44	Gradient Boost (General Model)	11	0.886	16453	296.012	2020873	0.63	2020	None	170	2020873	0	11887.5	16453	5192	61612	2051	63.03
ERR3357619.bin.38	51.38	0.17	Neural Network (Specific Model)	11	0.893	4941	305.298	1240967	0.52	1211	None	266	1240967	0	4665.29	4941	2794	14816	2015	51.61
ERR3357619.bin.43	92.85	2.04	Neural Network (Specific Model)	11	0.848	168265	289.961	3176210	0.31	3103	None	64	3176210	0	49628.3	168265	27587	479725	2017	30.84
ERR3357619.bin.44	85.4	1.32	Neural Network (Specific Model)	11	0.904	29951	301.286	2370309	0.57	2374	None	134	2370309	0	17688.9	29951	7944	87390	2576	57.13
ERR3357619.bin.5	94.59	0.02	Gradient Boost (General Model)	11	0.86	35856	310.816	2427614	0.55	2243	None	106	2427614	0	22902	35856	11144	124999	2723	55.42
ERR3357619.bin.50	86.35	0.51	Gradient Boost (General Model)	11	0.863	76685	328.691	3635144	0.46	3189	None	72	3635144	0	50488.1	76685	26288	349443	2004	46.17
ERR3357619.bin.58	72.03	3.48	Gradient Boost (General Model)	11	0.894	5179	280.588	2433714	0.47	2589	None	525	2433714	0	4635.65	5179	2619	26183	2010	46.81
ERR3357619.bin.6	71.91	2.29	Gradient Boost (General Model)	11	0.907	6352	287.221	3176364	0.48	3351	None	576	3176364	0	5514.52	6352	2904	32331	2013	47.63
ERR3357619.bin.68	95	2.99	Gradient Boost (General Model)	11	0.879	21482	305.585	4143729	0.47	3984	None	293	4143729	0	14142.4	21482	6675	98802	2042	47.25
ERR3357620.bin.11	97.07	1.75	Gradient Boost (General Model)	11	0.884	160161	335.026	1931564	0.41	1700	None	32	1931564	0	60361.4	160161	29597	247539	5184	40.58
ERR3357620.bin.16	98.9	0.15	Neural Network (Specific Model)	11	0.924	307157	298.915	1690198	0.34	1745	None	11	1690198	0	153654	307157	91972	627558	2185	34.49
ERR3357620.bin.17	83.36	3.62	Neural Network (Specific Model)	11	0.897	10429	323.441	4048063	0.42	3750	None	548	4048063	0	7386.98	10429	3150	74555	2004	42.13
ERR3357620.bin.23	84.84	0.02	Neural Network (Specific Model)	11	0.93	60102	359.808	2283327	0.52	1970	None	48	2283327	0	47569.3	60102	26291	164158	3177	51.69
ERR3357620.bin.25	61.2	0.64	Neural Network (Specific Model)	11	0.849	4332	241.484	1675990	0.49	1968	None	422	1675990	0	3971.54	4332	2338	15936	2004	49.36
ERR3357620.bin.27	85.68	0.96	Neural Network (Specific Model)	11	0.906	136234	372.361	2414806	0.51	1962	None	32	2414806	0	75462.7	136234	38295	247544	3103	51.41
ERR3357620.bin.28	95.73	0.16	Gradient Boost (General Model)	11	0.88	42088	335.105	1775279	0.41	1556	None	74	1775279	0	23990.3	42088	10897	104455	2172	40.57
ERR3357620.bin.29	96.73	0.25	Neural Network (Specific Model)	4	0.933	39641	341.259	610122	0.24	557	None	24	610122	0	25421.8	39641	12624	83884	2204	23.52
ERR3357620.bin.34	60.95	2.16	Gradient Boost (General Model)	11	0.916	5342	269.88	2368460	0.5	2684	None	498	2368460	0	4755.94	5342	2582	31196	2002	50.08
ERR3357620.bin.35	54.36	0.15	Neural Network (Specific Model)	11	0.931	4364	291.005	1196975	0.56	1279	None	289	1196975	0	4141.78	4364	2432	16353	2014	56.3
ERR3357620.bin.40	99.76	0.29	Neural Network (Specific Model)	11	0.882	160610	348.982	2052805	0.57	1732	None	17	2052805	0	120753	160610	67357	438787	14012	57.35
ERR3357620.bin.42	69.37	0.82	Neural Network (Specific Model)	11	0.901	5335	310.825	1467020	0.66	1419	None	302	1467020	0	4857.68	5335	2599	23968	2008	66.14
ERR3357620.bin.44	97.68	0	Gradient Boost (General Model)	11	0.906	76495	316.459	2259185	0.43	2159	None	66	2259185	0	34230.1	76495	18792	164419	2014	43.45
ERR3357620.bin.49	90.27	0.3	Gradient Boost (General Model)	11	0.893	13092	299.452	1445431	0.46	1439	None	160	1445431	0	9033.94	13092	4054	42354	2045	46.47
ERR3357620.bin.50	93.65	0.24	Gradient Boost (General Model)	11	0.907	53113	347.333	2274741	0.49	1983	None	74	2274741	0	30739.7	53113	14886	136777	2909	49.11
ERR3357620.bin.52	97.34	0.04	Gradient Boost (General Model)	11	0.916	160711	314.937	1991665	0.39	1934	None	26	1991665	0	76602.5	160711	57649	267787	2491	38.59
ERR3357620.bin.53	92.17	1.47	Gradient Boost (General Model)	11	0.864	47590	302.729	4725649	0.4	4504	None	227	4725649	0	20817.8	47590	8257	156578	2048	39.77
ERR3357620.bin.54	82.96	0.05	Neural Network (Specific Model)	11	0.894	73216	354.739	3130343	0.47	2632	None	62	3130343	0	50489.4	73216	24940	363009	2868	46.59
ERR3357620.bin.58	93.74	0.45	Neural Network (Specific Model)	11	0.885	25307	284.17	2028987	0.4	2109	None	119	2028987	0	17050.3	25307	8482	84704	2048	39.97
ERR3357620.bin.64	97.22	0.45	Neural Network (Specific Model)	11	0.919	33997	357.075	2324434	0.53	1997	None	104	2324434	0	22350.3	33997	9758	97340	2227	53.14
ERR3357620.bin.66	84.42	0.12	Neural Network (Specific Model)	11	0.9	32054	350.087	2016231	0.52	1730	None	90	2016231	0	22402.6	32054	11081	118331	2030	52.11
ERR3357620.bin.70	99.65	0.27	Neural Network (Specific Model)	11	0.888	16522	295.233	4385251	0.51	4402	None	382	4385251	0	11479.7	16522	5326	83232	2033	50.86
ERR3357620.bin.71	83.46	0.15	Gradient Boost (General Model)	11	0.879	34695	302.368	1956007	0.62	1899	None	88	1956007	0	22227.3	34695	10755	94070	2242	62.18
ERR3357620.bin.73	74.2	0.81	Neural Network (Specific Model)	11	0.915	141712	358.45	3251333	0.45	2771	None	33	3251333	0	98525.2	141712	51750	420465	2605	45.5
ERR3357620.bin.78	62	1.02	Gradient Boost (General Model)	11	0.868	4435	270.441	1243686	0.34	1333	None	307	1243686	0	4051.09	4435	2402	15433	2004	34.39
ERR3357620.bin.84	88.51	1.22	Neural Network (Specific Model)	11	0.904	19353	343.453	2028803	0.53	1783	None	148	2028803	0	13708.1	19353	6947	76312	2224	52.54
ERR3357620.bin.88	89.44	0.03	Neural Network (Specific Model)	11	0.909	33212	349.598	2132574	0.55	1852	None	91	2132574	0	23434.9	33212	10557	137329	2975	55.23
ERR3357620.bin.90	87.3	4.13	Neural Network (Specific Model)	11	0.896	13739	328.267	2021331	0.61	1841	None	204	2021331	0	9908.49	13739	4467	99164	2007	60.84
ERR3357621.bin.21	96.51	0	Gradient Boost (General Model)	11	0.81	57143	325.265	1743082	0.31	1449	None	43	1743082	0	40536.8	57143	21612	283959	2166	31.08
ERR3357621.bin.25	95.8	0	Gradient Boost (General Model)	11	0.88	162188	288.357	1071013	0.46	1091	None	10	1071013	0	107101	162188	35486	209671	24303	45.77
ERR3357621.bin.35	97.74	0.33	Neural Network (Specific Model)	4	0.927	36159	350.413	693052	0.23	612	None	23	693052	0	30132.7	36159	17623	80059	3942	23.28
ERR3357621.bin.38	90.04	0	Neural Network (Specific Model)	11	0.921	158643	355.694	2212416	0.43	1912	None	30	2212416	0	73747.2	158643	33980	228740	2927	43.34
ERR3357621.bin.39	89.55	0.5	Gradient Boost (General Model)	11	0.886	167520	338.392	1668686	0.49	1459	None	17	1668686	0	98158	167520	40145	406920	18164	48.51
ERR3357621.bin.43	66.58	0.24	Neural Network (Specific Model)	11	0.91	70453	365.269	1321482	0.6	1099	None	23	1321482	0	57455.7	70453	38028	182145	4549	60.15
ERR3357621.bin.45	68.92	1.05	Gradient Boost (General Model)	11	0.902	5013	279.838	2586068	0.36	2786	None	569	2586068	0	4544.94	5013	2417	33913	2001	35.54
ERR3357621.bin.49	59.48	1.18	Neural Network (Specific Model)	11	0.877	4863	260.786	1956038	0.57	2196	None	445	1956038	0	4395.59	4863	2368	24421	2000	56.76
ERR3357621.bin.5	94.57	0.6	Gradient Boost (General Model)	11	0.926	20574	332.428	1622148	0.54	1508	None	131	1622148	0	12382.8	20574	5457	70840	2025	54.12
ERR3357621.bin.51	92.66	2.18	Neural Network (Specific Model)	11	0.889	14681	283.146	1994496	0.4	2090	None	209	1994496	0	9543.04	14681	4118	72857	2035	40.02
ERR3357621.bin.58	73.96	1.27	Neural Network (Specific Model)	11	0.872	8532	286.692	2786664	0.48	2832	None	409	2786664	0	6813.36	8532	3296	50256	2003	48.12
ERR3357621.bin.59	74.06	1.09	Gradient Boost (General Model)	11	0.896	49349	338.772	3201109	0.47	2827	None	89	3201109	0	35967.5	49349	16545	167442	2530	46.54
ERR3357621.bin.62	96.48	0.85	Gradient Boost (General Model)	11	0.858	80659	330.272	3821580	0.35	3312	None	68	3821580	0	56199.7	80659	29809	228228	2306	35.03
ERR3357621.bin.83	57.99	0.11	Neural Network (Specific Model)	11	0.911	35434	347.027	1265021	0.54	1109	None	60	1265021	0	21083.7	35434	8922	83723	2159	54.24
ERR3357621.bin.85	89.45	0.14	Neural Network (Specific Model)	11	0.8	22317	336.887	2248514	0.59	1783	None	134	2248514	0	16780	22317	7637	214669	2186	59.27
ERR3357621.bin.88	55.57	0.03	Neural Network (Specific Model)	11	0.916	120927	372.607	1474676	0.5	1210	None	21	1474676	0	70222.7	120927	38739	210950	7739	49.68
ERR3357622.bin.14	71.54	0.31	Gradient Boost (General Model)	11	0.911	5408	286.161	1124915	0.56	1196	None	237	1124915	0	4746.48	5408	2680	23914	2005	56.05
ERR3357622.bin.17	97.1	2.14	Gradient Boost (General Model)	11	0.903	47523	329.524	1598877	0.48	1463	None	55	1598877	0	29070.5	47523	10900	142743	2980	48.28
ERR3357622.bin.24	99.08	0.29	Gradient Boost (General Model)	11	0.913	46870	344.909	1895637	0.32	1677	None	58	1895637	0	32683.4	46870	17627	130406	2257	32.25
ERR3357622.bin.26	77.18	0.01	Gradient Boost (General Model)	11	0.907	61247	343.65	1157745	0.48	1020	None	28	1157745	0	41348	61247	21370	150772	3173	47.62
ERR3357622.bin.35	97.58	0.66	Gradient Boost (General Model)	11	0.917	15065	312.562	1402058	0.49	1373	None	126	1402058	0	11127.4	15065	5207	59326	2056	48.55
ERR3357622.bin.37	69.6	1.33	Neural Network (Specific Model)	11	0.926	9617	327.536	1667124	0.48	1574	None	213	1667124	0	7826.87	9617	3856	45894	2140	48.24
ERR3357622.bin.4	84.85	3.96	Neural Network (Specific Model)	11	0.892	48146	306.704	3672655	0.5	3569	None	118	3672655	0	31124.2	48146	17154	158420	2502	49.55
ERR3357622.bin.42	81.18	3.47	Gradient Boost (General Model)	11	0.907	7581	292.493	2800970	0.49	2901	None	452	2800970	0	6196.84	7581	3176	29115	2014	48.63
ERR3357622.bin.45	59.99	1.58	Gradient Boost (General Model)	11	0.883	5172	267.242	2062677	0.49	2276	None	451	2062677	0	4573.56	5172	2478	28495	2007	48.65
ERR3357622.bin.46	79.4	0.21	Neural Network (Specific Model)	11	0.911	45235	367.465	1622381	0.59	1342	None	62	1622381	0	26167.4	45235	12427	101894	2037	59.32
ERR3357622.bin.49	99.84	0.1	Neural Network (Specific Model)	11	0.919	56548	359.556	2419544	0.54	2064	None	62	2419544	0	39024.9	56548	21014	319268	3289	53.88
ERR3357622.bin.55	66.17	0.41	Gradient Boost (General Model)	11	0.858	29916	307.019	2044907	0.61	1909	None	126	2044907	0	16229.4	29916	8040	95467	2000	60.58
ERR3357622.bin.58	96.59	2.34	Gradient Boost (General Model)	11	0.926	18455	323.7	1468102	0.45	1402	None	108	1468102	0	13593.5	18455	7122	70903	2115	45.32
ERR3357622.bin.67	56.39	0.34	Neural Network (Specific Model)	11	0.89	62125	362.522	1724915	0.5	1414	None	39	1724915	0	44228.6	62125	20943	288295	4574	49.52
ERR3357622.bin.77	94.28	1.6	Gradient Boost (General Model)	11	0.898	33904	329.468	3734572	0.46	3398	None	172	3734572	0	21712.6	33904	10851	119576	2088	46.36
ERR3357622.bin.8	58.13	0	Gradient Boost (General Model)	11	0.906	162527	330.766	946545	0.49	866	None	12	946545	0	78878.8	162527	34110	210779	7171	49.48
ERR3357622.bin.84	96.2	0	Gradient Boost (General Model)	11	0.88	52789	292.364	935861	0.51	940	None	27	935861	0	34661.5	52789	19693	145268	2332	51.23
ERR3357622.bin.9	84.26	0.39	Neural Network (Specific Model)	11	0.9	38363	310.212	1600822	0.37	1550	None	56	1600822	0	28586.1	38363	17599	77127	3808	37.44
ERR3357622.bin.96	71.41	0.01	Neural Network (Specific Model)	11	0.867	88186	332.102	1400603	0.63	1221	None	27	1400603	0	51874.2	88186	31225	166905	2744	63.27
ERR3357623.bin.14	89.64	0.28	Gradient Boost (General Model)	11	0.869	47757	309.26	2487614	0.63	2334	None	77	2487614	0	32306.7	47757	16740	120166	2119	63.05
ERR3357623.bin.15	89.05	0.43	Neural Network (Specific Model)	11	0.877	95674	311.432	3504483	0.46	3296	None	61	3504483	0	57450.5	95674	50993	213800	2018	45.54
ERR3357623.bin.2	72.89	0.06	Neural Network (Specific Model)	11	0.866	13178	304.268	2052946	0.34	1950	None	208	2052946	0	9869.93	13178	4754	49502	2018	33.82
ERR3357623.bin.20	96.6	3.15	Gradient Boost (General Model)	11	0.904	15278	307.45	2986832	0.36	2932	None	272	2986832	0	10981	15278	4947	77655	2000	36.4
ERR3357623.bin.21	55.22	0.16	Neural Network (Specific Model)	11	0.871	5607	291.893	2157279	0.48	2149	None	429	2157279	0	5028.62	5607	2646	23641	2015	47.54
ERR3357623.bin.31	68.73	0.45	Neural Network (Specific Model)	11	0.897	50149	335.037	2937812	0.47	2626	None	80	2937812	0	36722.7	50149	19261	212370	3030	46.86
ERR3357623.bin.32	61.13	1.33	Gradient Boost (General Model)	11	0.87	95523	323.682	2378031	0.48	2135	None	51	2378031	0	46628.1	95523	25309	186055	2031	47.56
ERR3357623.bin.33	81.68	1.99	Gradient Boost (General Model)	11	0.873	31116	304.341	3015694	0.6	2890	None	181	3015694	0	16661.3	31116	7854	105526	2010	59.62
ERR3357623.bin.37	56.5	0.08	Gradient Boost (General Model)	11	0.903	4403	263.36	721718	0.47	827	None	181	721718	0	3987.39	4403	2340	13643	2011	47.36
ERR3357623.bin.43	89.94	0.7	Gradient Boost (General Model)	11	0.893	39524	309.209	3523590	0.5	3398	None	144	3523590	0	24469.4	39524	12188	112250	2311	49.66
ERR3357623.bin.44	78.71	2.59	Neural Network (Specific Model)	11	0.902	8922	302.712	3457199	0.47	3441	None	483	3457199	0	7157.76	8922	3359	52467	2000	46.59
ERR3357623.bin.45	84.74	1.53	Gradient Boost (General Model)	11	0.861	6972	272.441	1936213	0.56	2044	None	329	1936213	0	5885.15	6972	3072	27849	2016	55.58
ERR3357623.bin.48	90.52	0.14	Neural Network (Specific Model)	11	0.804	23437	344.888	2349129	0.59	1829	None	152	2349129	0	15454.8	23437	6579	108661	2124	58.75
ERR3357623.bin.6	52.98	0	Neural Network (Specific Model)	11	0.915	148026	314.588	1090320	0.36	1060	None	13	1090320	0	83870.8	148026	49781	287977	2347	35.75
ERR3357624.bin.10	82.48	3.11	Gradient Boost (General Model)	11	0.889	26136	324.77	3629829	0.51	3316	None	208	3629829	0	17451.1	26136	9004	217475	2103	50.7
ERR3357624.bin.12	77.83	1.41	Gradient Boost (General Model)	11	0.848	5970	275.793	2054567	0.59	2109	None	394	2054567	0	5214.64	5970	2862	24560	2004	59.17
ERR3357624.bin.16	93.2	0.72	Gradient Boost (General Model)	11	0.878	66102	314.791	3212664	0.48	2993	None	67	3212664	0	47950.2	66102	25115	233827	2718	48.11
ERR3357624.bin.17	83.87	0.08	Gradient Boost (General Model)	11	0.894	7851	291.731	1092430	0.48	1118	None	163	1092430	0	6702.02	7851	3318	29916	2068	47.5
ERR3357624.bin.23	57.02	1.19	Gradient Boost (General Model)	11	0.873	5433	286.159	2938330	0.57	2994	None	601	2938330	0	4889.07	5433	2766	40957	2006	56.59
ERR3357624.bin.32	83	0.57	Gradient Boost (General Model)	11	0.917	8309	299.581	2550382	0.43	2607	None	373	2550382	0	6837.49	8309	3455	38949	2013	42.77
ERR3357624.bin.35	83.83	1.77	Gradient Boost (General Model)	11	0.883	63527	344.117	2952878	0.52	2529	None	64	2952878	0	46138.7	63527	26491	256025	3406	51.61
ERR3357624.bin.37	90.04	0.29	Neural Network (Specific Model)	11	0.907	106757	357.318	1877872	0.6	1591	None	33	1877872	0	56905.2	106757	33855	170662	2401	59.61
ERR3357624.bin.4	74.46	0.89	Gradient Boost (General Model)	11	0.858	5551	292.62	1287440	0.61	1261	None	256	1287440	0	5029.06	5551	2685	21351	2005	61.46
ERR3357624.bin.46	72.48	0.57	Gradient Boost (General Model)	11	0.873	8161	282.541	2413098	0.52	2490	None	344	2413098	0	7014.82	8161	3814	53838	2046	52.12
ERR3357624.bin.5	81.98	0.85	Neural Network (Specific Model)	11	0.921	22600	340.626	1750886	0.55	1580	None	116	1750886	0	15093.8	22600	7140	88498	2064	55.18
ERR3357624.bin.53	94.74	1.43	Gradient Boost (General Model)	11	0.909	22545	329.122	1613838	0.47	1488	None	110	1613838	0	14671.2	22545	6599	75273	2221	46.76
ERR3357624.bin.57	69.06	0.94	Neural Network (Specific Model)	11	0.851	53843	317.092	2978507	0.35	2668	None	75	2978507	0	39713.4	53843	23225	287333	2339	34.87
ERR3357624.bin.59	73.04	4.18	Gradient Boost (General Model)	11	0.931	6365	300.371	1781663	0.5	1844	None	340	1781663	0	5240.19	6365	2765	22684	2006	49.7
ERR3357624.bin.6	87.39	0.42	Gradient Boost (General Model)	11	0.89	115748	325.954	3249594	0.43	2962	None	47	3249594	0	69140.3	115748	42566	289536	2245	43.06
ERR3357624.bin.8	71.01	0.99	Neural Network (Specific Model)	11	0.907	4384	254.143	1379588	0.33	1647	None	341	1379588	0	4045.71	4384	2340	16989	2002	33.06
ERR3357625.bin.1	99.95	1.85	Neural Network (Specific Model)	11	0.893	23932	335.887	3041067	0.49	2698	None	200	3041067	0	15205.3	23932	7095	146615	2005	48.52
ERR3357625.bin.10	70.7	1.66	Neural Network (Specific Model)	11	0.916	9967	325.795	2131476	0.49	2001	None	286	2131476	0	7452.71	9967	3676	36053	2030	48.83
ERR3357625.bin.11	98.25	0.05	Gradient Boost (General Model)	11	0.902	64172	323.138	2167367	0.44	2019	None	49	2167367	0	44232	64172	23324	155516	2100	43.56
ERR3357625.bin.21	88.9	1.25	Gradient Boost (General Model)	11	0.892	32144	311.036	3689440	0.5	3535	None	185	3689440	0	19942.9	32144	10081	98809	2163	49.53
ERR3357625.bin.26	94.29	0.44	Gradient Boost (General Model)	11	0.896	30348	316.372	1355063	0.47	1281	None	69	1355063	0	19638.6	30348	10485	98912	2064	46.9
ERR3357625.bin.27	78.58	3.57	Gradient Boost (General Model)	11	0.872	7954	292.881	3995112	0.56	3974	None	630	3995112	0	6341.45	7954	3213	41646	2001	56.22
ERR3357625.bin.28	65.57	2.94	Neural Network (Specific Model)	11	0.874	5537	276.771	2512475	0.44	2652	None	512	2512475	0	4907.18	5537	2572	30637	2000	43.55
ERR3357625.bin.30	81.97	1.61	Neural Network (Specific Model)	11	0.923	35375	335.592	2394269	0.49	2200	None	101	2394269	0	23705.6	35375	11765	104880	2204	48.99
ERR3357625.bin.31	83.06	0.5	Neural Network (Specific Model)	11	0.885	99252	317.744	3855793	0.45	3588	None	103	3855793	0	37434.9	99252	19322	303496	2032	44.98
ERR3357625.bin.37	93.02	0.35	Gradient Boost (General Model)	11	0.899	152891	331.235	3531262	0.46	3200	None	50	3531262	0	70625.2	152891	35724	263199	3451	45.86
ERR3357625.bin.47	92.29	1.52	Gradient Boost (General Model)	11	0.885	64198	344.11	3649700	0.51	3132	None	90	3649700	0	40552.2	64198	19510	223812	2360	51.41
ERR3357625.bin.52	92.51	0.36	Neural Network (Specific Model)	11	0.908	100001	339.518	3198549	0.51	2855	None	61	3198549	0	52435.2	100001	25785	272224	2124	51.19
ERR3357625.bin.53	87.17	0.74	Neural Network (Specific Model)	11	0.899	84666	348.895	3020891	0.45	2597	None	49	3020891	0	61650.8	84666	30585	266755	6381	44.76
ERR3357625.bin.57	92.48	2.91	Gradient Boost (General Model)	11	0.888	21762	325.235	3668142	0.51	3345	None	243	3668142	0	15095.2	21762	7734	100118	2018	50.51
ERR3357625.bin.58	62.25	0.09	Neural Network (Specific Model)	11	0.913	73113	288.265	1080974	0.37	1144	None	28	1080974	0	38606.2	73113	19101	147775	2158	37.24
ERR3357625.bin.6	96.37	1.89	Gradient Boost (General Model)	11	0.856	89851	325.29	3628954	0.35	3187	None	72	3628954	0	50402.1	89851	27977	188326	2000	35.16
ERR3357625.bin.66	71.62	0.2	Neural Network (Specific Model)	11	0.908	101858	350.282	2760148	0.52	2388	None	39	2760148	0	70773	101858	37343	302274	3807	52.47
ERR3357625.bin.8	87.08	0.05	Gradient Boost (General Model)	11	0.893	73619	314.832	3170823	0.46	3004	None	70	3170823	0	45297.5	73619	27789	166295	2227	45.89
ERR3357625.bin.9	91.74	2.18	Gradient Boost (General Model)	11	0.882	15550	300.82	3211891	0.48	3145	None	310	3211891	0	10360.9	15550	4737	78490	2002	48.11
ERR3357626.bin.12	84.56	1.1	Neural Network (Specific Model)	11	0.908	72858	333.263	4000126	0.46	3640	None	91	4000126	0	43957.4	72858	22348	226811	2082	46.23
ERR3357626.bin.2	59.53	0.04	Neural Network (Specific Model)	11	0.888	4044	251.97	1190054	0.34	1400	None	299	1190054	0	3980.11	4044	2291	27326	2001	33.72
ERR3357626.bin.53	64.38	1.14	Neural Network (Specific Model)	11	0.879	5882	306.857	2282627	0.5	2183	None	448	2282627	0	5095.15	5882	2799	25192	2021	49.99
ERR3357626.bin.54	67.96	0.22	Neural Network (Specific Model)	11	0.897	34233	291.038	683293	0.44	703	None	26	683293	0	26280.5	34233	15571	94694	2124	43.9
ERR3357626.bin.58	88.52	0.32	Neural Network (Specific Model)	11	0.902	60763	348.214	3092176	0.48	2674	None	101	3092176	0	30615.6	60763	14073	226230	2016	48.4
ERR3357626.bin.62	54.03	0.53	Neural Network (Specific Model)	11	0.902	22433	359.253	1310501	0.54	1098	None	102	1310501	0	12848	22433	5657	46983	2201	54.42
ERR3357626.bin.65	64.87	0.1	Neural Network (Specific Model)	11	0.88	41418	288.536	1187278	0.4	1209	None	47	1187278	0	25261.2	41418	13761	121002	2129	39.6
ERR3357626.bin.70	82.15	2.99	Gradient Boost (General Model)	11	0.867	26662	318.986	3869649	0.5	3511	None	232	3869649	0	16679.5	26662	8041	97892	2010	50.13
ERR3357626.bin.74	65.92	0.42	Neural Network (Specific Model)	11	0.864	20702	305.224	692649	0.44	655	None	38	692649	0	18227.6	20702	9602	56073	2972	44.34
ERR3357626.bin.90	99.92	2.29	Neural Network (Specific Model)	11	0.847	27942	293.896	3389412	0.33	3261	None	228	3389412	0	14865.8	27942	6060	90340	2049	32.78
ERR3357626.bin.94	73.43	0.16	Neural Network (Specific Model)	11	0.921	60395	348.728	1712019	0.51	1510	None	43	1712019	0	39814.4	60395	21748	161429	2245	50.83
ERR3357627.bin.104	75.08	0.07	Neural Network (Specific Model)	11	0.903	80704	381.701	2090403	0.51	1651	None	28	2090403	0	74657.2	80704	45061	211294	14621	51.18
ERR3357627.bin.105	75.84	0	Neural Network (Specific Model)	11	0.927	55098	354.708	1906044	0.52	1663	None	55	1906044	0	34655.3	55098	16784	146542	2464	52.13
ERR3357627.bin.12	72.21	0.11	Neural Network (Specific Model)	11	0.882	71962	353.104	1472740	0.66	1227	None	32	1472740	0	46023.1	71962	21133	137940	5081	65.97
ERR3357627.bin.16	99.99	0.04	Neural Network (Specific Model)	11	0.907	56819	300.726	1750314	0.33	1765	None	56	1750314	0	31255.6	56819	15269	116228	2077	33.21
[truncated: 7,931 more rows]

## Sheet: Supplementary Table 2
Supplementary Table 2. Detailed overview of genes involved in the biosynthesis of vitamins B and K2, including relevant characteristics.
Vitamin	Number of genes	KO ID	Enzyme	EC No.
Biotin	61256	K00059	3-oxoacyl-[acyl-carrier protein] reductase	[EC:1.1.1.100]
Biotin		K00208	enoyl-[acyl-carrier protein] reductase I	[EC:1.3.1.9 1.3.1.10]
Biotin		K00647	3-oxoacyl-[acyl-carrier-protein] synthase I	[EC:2.3.1.41]
Biotin		K00652	8-amino-7-oxononanoate synthase	[EC:2.3.1.47]
Biotin		K00833	adenosylmethionine---8-amino-7-oxononanoate aminotransferase	[EC:2.6.1.62]
Biotin		K01012	biotin synthase	[EC:2.8.1.6]
Biotin		K01906	6-carboxyhexanoate--CoA ligase	[EC:6.2.1.14]
Biotin		K01935	dethiobiotin synthetase	[EC:6.3.3.3]
Biotin		K02169	malonyl-CoA O-methyltransferase	[EC:2.1.1.197]
Biotin		K02170	pimeloyl-[acyl-carrier protein] methyl ester esterase	[EC:3.1.1.85]
Biotin		K02372	3-hydroxyacyl-[acyl-carrier-protein] dehydratase	[EC:4.2.1.59]
Biotin		K09458	3-oxoacyl-[acyl-carrier-protein] synthase II	[EC:2.3.1.179]
Biotin		K09789	pimeloyl-[acyl-carrier protein] methyl ester esterase	[EC:3.1.1.85]
Biotin		K16593	pimeloyl-[acyl-carrier protein] synthase	[EC:1.14.14.46]
Biotin		K19561	pimeloyl-[acyl-carrier protein] methyl ester esterase	[EC:3.1.1.85]
Biotin		K19563	lysine---8-amino-7-oxononanoate aminotransferase	[EC:2.6.1.105]
Cobalamin	47084	K00595	precorrin-6B C5,15-methyltransferase / cobalt-precorrin-6B C5,C15-methyltransferase	[EC:2.1.1.132 2.1.1.289 2.1.1.196]
Cobalamin		K00768	nicotinate-nucleotide--dimethylbenzimidazole phosphoribosyltransferase	[EC:2.4.2.21]
Cobalamin		K00798	cob(I)alamin adenosyltransferase	[EC:2.5.1.17]
Cobalamin		K02188	cobalt-precorrin-5B (C1)-methyltransferase	[EC:2.1.1.195]
Cobalamin		K02189	cobalt-precorrin 5A hydrolase	[EC:3.7.1.12]
Cobalamin		K02190	sirohydrochlorin cobaltochelatase	[EC:4.99.1.3]
Cobalamin		K02191	cobalt-precorrin-6B (C15)-methyltransferase	[EC:2.1.1.196]
Cobalamin		K02224	cobyrinic acid a,c-diamide synthase	[EC:6.3.5.9 6.3.5.11]
Cobalamin		K02225	cobalamin biosynthesis protein CobC
Cobalamin		K02226	alpha-ribazole phosphatase	[EC:3.1.3.73]
Cobalamin		K02227	adenosylcobinamide-phosphate synthase	[EC:6.3.1.10]
Cobalamin		K02228	precorrin-6A synthase	[EC:2.1.1.152]
Cobalamin		K02229	precorrin-3B synthase	[EC:1.14.13.83]
Cobalamin		K02230	cobaltochelatase CobN	[EC:6.6.1.2]
Cobalamin		K02231	adenosylcobinamide kinase / adenosylcobinamide-phosphate guanylyltransferase	[EC:2.7.1.156 2.7.7.62]
Cobalamin		K02232	adenosylcobyric acid synthase	[EC:6.3.5.10]
Cobalamin		K02233	adenosylcobinamide-GDP ribazoletransferase	[EC:2.7.8.26]
Cobalamin		K02302	uroporphyrin-III C-methyltransferase / precorrin-2 dehydrogenase / sirohydrochlorin ferrochelatase	[EC:2.1.1.107 1.3.1.76 4.99.1.4]
Cobalamin		K03394	precorrin-2/cobalt-factor-2 C20-methyltransferase	[EC:2.1.1.130 2.1.1.151]
Cobalamin		K03399	cobalt-precorrin-7 (C5)-methyltransferase	[EC:2.1.1.289]
Cobalamin		K03795	sirohydrochlorin cobaltochelatase	[EC:4.99.1.3]
Cobalamin		K04720	threonine-phosphate decarboxylase	[EC:4.1.1.81]
Cobalamin		K05895	precorrin-6A/cobalt-precorrin-6A reductase	[EC:1.3.1.54 1.3.1.106]
Cobalamin		K05934	precorrin-3B C17-methyltransferase / cobalt-factor III methyltransferase	[EC:2.1.1.131 2.1.1.272]
Cobalamin		K05936	precorrin-4/cobalt-precorrin-4 C11-methyltransferase	[EC:2.1.1.133 2.1.1.271]
Cobalamin		K06042	precorrin-8X/cobalt-precorrin-8 methylmutase	[EC:5.4.99.61 5.4.99.60]
Cobalamin		K08260	adenosylcobinamide hydrolase	[EC:3.5.1.90]
Cobalamin		K09882	cobaltochelatase CobS	[EC:6.6.1.2]
Cobalamin		K09883	cobaltochelatase CobT	[EC:6.6.1.2]
Cobalamin		K13540	precorrin-2 C20-methyltransferase / precorrin-3B C17-methyltransferase	[EC:2.1.1.130 2.1.1.131]
Cobalamin		K13541	cobalt-precorrin 5A hydrolase / cobalt-factor III methyltransferase / precorrin-3B C17-methyltransferase	[EC:3.7.1.12 2.1.1.272 2.1.1.131]
Cobalamin		K13786	cob(II)yrinic acid a,c-diamide reductase	[EC:1.16.8.-]
Cobalamin		K16651	L-threonine kinase	[EC:2.7.1.177]
Cobalamin		K19221	cob(I)alamin adenosyltransferase	[EC:2.5.1.17]
Cobalamin		K19712	adenosylcobinamide-phosphate guanylyltransferase	[EC:2.7.7.62]
Cobalamin		K21479	cobalt-factor III methyltransferase	[EC:2.1.1.272]
Cobalamin		K22011	sirohydrochlorin cobalto/nickelchelatase	[EC:4.99.1.3 4.99.1.11]
Cobalamin		K22316	ribonuclease H / adenosylcobalamin/alpha-ribazole phosphatase	[EC:3.1.26.4 3.1.3.73]
Cobalamin		K24866	precorrin-2 dehydrogenase	[EC:1.3.1.76]
Cobalamin		K25496	adenosylcobalamin phosphodiesterase
Folate	54151	K00287	dihydrofolate reductase	[EC:1.5.1.3]
Folate		K00796	dihydropteroate synthase	[EC:2.5.1.15]
Folate		K00950	2-amino-4-hydroxy-6-hydroxymethyldihydropteridine diphosphokinase	[EC:2.7.6.3]
Folate		K01077	alkaline phosphatase	[EC:3.1.3.1]
Folate		K01113	alkaline phosphatase D	[EC:3.1.3.1]
Folate		K01495	GTP cyclohydrolase IA	[EC:3.5.4.16]
Folate		K01633	7,8-dihydroneopterin aldolase/epimerase/oxygenase	[EC:4.1.2.25 5.1.99.8 1.13.11.81]
Folate		K01664	para-aminobenzoate synthetase component II	[EC:2.6.1.85]
Folate		K01665	para-aminobenzoate synthetase component I	[EC:2.6.1.85]
Folate		K02619	4-amino-4-deoxychorismate lyase	[EC:4.1.3.38]
Folate		K03342	para-aminobenzoate synthetase / 4-amino-4-deoxychorismate lyase	[EC:2.6.1.85 4.1.3.38]
Folate		K07142	2-amino-4-hydroxy-6-hydroxymethyldihydropteridine diphosphokinase	[EC:2.7.6.3]
Folate		K09007	GTP cyclohydrolase IB	[EC:3.5.4.16]
Folate		K09739	dihydroneopterin aldolase	[EC:4.1.2.25]
Folate		K11754	dihydrofolate synthase / folylpolyglutamate synthase	[EC:6.3.2.12 6.3.2.17]
Folate		K13938	dihydromonapterin reductase / dihydrofolate reductase	[EC:1.5.1.50 1.5.1.3]
Folate		K13940	dihydroneopterin aldolase / 2-amino-4-hydroxy-6-hydroxymethyldihydropteridine diphosphokinase	[EC:4.1.2.25 2.7.6.3]
Folate		K13941	2-amino-4-hydroxy-6-hydroxymethyldihydropteridine diphosphokinase / dihydropteroate synthase	[EC:2.7.6.3 2.5.1.15]
Folate		K13950	para-aminobenzoate synthetase	[EC:2.6.1.85]
Folate		K17487	7,8-dihydroneopterin 2',3'-cyclic phosphate phosphodiesterase	[EC:3.1.4.56]
Folate		K17488	GTP cyclohydrolase IV	[EC:3.5.4.39]
Folate		K18482	4-amino-4-deoxychorismate lyase	[EC:4.1.3.38]
Folate		K18589	dihydrofolate reductase (trimethoprim resistance protein)	[EC:1.5.1.3]
Folate		K18590	dihydrofolate reductase (trimethoprim resistance protein)	[EC:1.5.1.3]
Folate		K18591	dihydrofolate reductase (trimethoprim resistance protein)	[EC:1.5.1.3]
Folate		K18824	dihydropteroate synthase type 2	[EC:2.5.1.15]
Folate		K18974	dihydropteroate synthase type 1	[EC:2.5.1.15]
Folate		K19644	dihydrofolate reductase (trimethoprim resistance protein)	[EC:1.5.1.3]
Folate		K22099	dihydrofolate synthase / folylpolyglutamate synthase	[EC:6.3.2.12 6.3.2.17]
Folate		K22391	GTP cyclohydrolase I	[EC:3.5.4.16]
Folate		K25575	4-amino-4-deoxychorismate synthase (2-amino-4-deoxychorismate-forming) component II	[EC:2.6.1.123]
Folate		K25578	4-amino-4-deoxychorismate synthase (2-amino-4-deoxychorismate-forming) component I	[EC:2.6.1.123]
Menaquinone	2637	K11782	chorismate dehydratase	[EC:4.2.1.151]
Menaquinone		K11783	futalosine hydrolase	[EC:3.2.2.26]
Menaquinone		K11784	cyclic dehypoxanthinyl futalosine synthase	[EC:1.21.98.1]
Menaquinone		K11785	1,4-dihydroxy-6-naphthoate synthase	[EC:1.14.-.-]
Menaquinone		K18284	adenosylhomocysteine/aminodeoxyfutalosine nucleosidase	[EC:3.2.2.9 3.2.2.30]
Menaquinone		K18285	aminodeoxyfutalosine synthase	[EC:2.5.1.120]
Menaquinone		K18286	aminodeoxyfutalosine deaminase	[EC:3.5.4.40]
Menaquinone		K20810	aminodeoxyfutalosine deaminase	[EC:3.5.4.40]
Niacin	41688	K00278	L-aspartate oxidase	[EC:1.4.3.16]
Niacin		K00767	nicotinate-nucleotide pyrophosphorylase (carboxylating)	[EC:2.4.2.19]
Niacin		K00952	nicotinamide-nucleotide adenylyltransferase	[EC:2.7.7.1]
Niacin		K00969	nicotinate-nucleotide adenylyltransferase	[EC:2.7.7.18]
Niacin		K01513	ectonucleotide pyrophosphatase/phosphodiesterase family member 1/3	[EC:3.1.4.1 3.6.1.9]
Niacin		K01916	NAD+ synthase	[EC:6.3.1.5]
Niacin		K01950	NAD+ synthase (glutamine-hydrolysing)	[EC:6.3.5.1]
Niacin		K03426	NAD+ diphosphatase	[EC:3.6.1.22]
Niacin		K03517	quinolinate synthase	[EC:2.5.1.72]
Niacin		K06211	HTH-type transcriptional regulator, transcriptional repressor of NAD biosynthesis genes	[EC:2.7.7.1 2.7.1.22]
Niacin		K06989	aspartate dehydrogenase	[EC:1.4.1.21]
Niacin		K13522	bifunctional NMN adenylyltransferase/nudix hydrolase	[EC:2.7.7.1 3.6.1.-]
Pantothenate	96294	K00053	ketol-acid reductoisomerase	[EC:1.1.1.86]
Pantothenate		K00077	2-dehydropantoate 2-reductase	[EC:1.1.1.169]
Pantothenate		K00128	aldehyde dehydrogenase (NAD+)	[EC:1.2.1.3]
Pantothenate		K00207	dihydropyrimidine dehydrogenase (NADP+)	[EC:1.3.1.2]
Pantothenate		K00606	3-methyl-2-oxobutanoate hydroxymethyltransferase	[EC:2.1.2.11]
Pantothenate		K00859	dephospho-CoA kinase	[EC:2.7.1.24]
Pantothenate		K00867	type I pantothenate kinase	[EC:2.7.1.33]
Pantothenate		K00954	pantetheine-phosphate adenylyltransferase	[EC:2.7.7.3]
Pantothenate		K00997	holo-[acyl-carrier protein] synthase	[EC:2.7.8.7]
Pantothenate		K01431	beta-ureidopropionase	[EC:3.5.1.6]
Pantothenate		K01464	dihydropyrimidinase	[EC:3.5.2.2]
Pantothenate		K01579	aspartate 1-decarboxylase	[EC:4.1.1.11]
Pantothenate		K01598	phosphopantothenoylcysteine decarboxylase	[EC:4.1.1.36]
Pantothenate		K01652	acetolactate synthase I/II/III large subunit	[EC:2.2.1.6]
Pantothenate		K01653	acetolactate synthase I/III small subunit	[EC:2.2.1.6]
Pantothenate		K01687	dihydroxy-acid dehydratase	[EC:4.2.1.9]
Pantothenate		K01918	pantoate--beta-alanine ligase	[EC:6.3.2.1]
Pantothenate		K02201	pantetheine-phosphate adenylyltransferase	[EC:2.7.7.3]
Pantothenate		K03525	type III pantothenate kinase	[EC:2.7.1.33]
Pantothenate		K04765	nucleoside triphosphate diphosphatase	[EC:3.6.1.9]
Pantothenate		K06016	beta-ureidopropionase / N-carbamoyl-L-amino-acid hydrolase	[EC:3.5.1.6 3.5.1.87]
Pantothenate		K06133	4'-phosphopantetheinyl transferase	[EC:2.7.8.-]
Pantothenate		K06982	pantoate kinase	[EC:2.7.1.169]
Pantothenate		K08682	acyl carrier protein phosphodiesterase	[EC:3.1.4.14]
Pantothenate		K09680	type II pantothenate kinase	[EC:2.7.1.33]
Pantothenate		K09722	4-phosphopantoate---beta-alanine ligase	[EC:6.3.2.36]
Pantothenate		K09735	GTP-dependent dephospho-CoA kinase	[EC:2.7.1.237]
Pantothenate		K11258	acetolactate synthase II small subunit	[EC:2.2.1.6]
Pantothenate		K13038	phosphopantothenoylcysteine decarboxylase / phosphopantothenate---cysteine ligase	[EC:4.1.1.36 6.3.2.5]
Pantothenate		K13799	pantoate ligase / CMP/dCMP kinase	[EC:6.3.2.1 2.7.4.25]
Pantothenate		K17722	dihydropyrimidine dehydrogenase (NAD+) subunit PreT	[EC:1.3.1.1]
Pantothenate		K17723	dihydropyrimidine dehydrogenase (NAD+) subunit PreA	[EC:1.3.1.1]
Pantothenate		K17839	polyamine oxidase	[EC:1.5.3.17 1.5.3.-]
Pantothenate		K18933	tyrosine decarboxylase / aspartate 1-decarboxylase	[EC:4.1.1.25 4.1.1.11]
Pantothenate		K21977	phosphopantothenate---cysteine ligase (CTP)	[EC:6.3.2.5]
Pantothenate		K24263	2-dehydropantoate 2-reductase	[EC:1.1.1.169]
Pantothenate		K24264	aspartate 1-decarboxylase	[EC:4.1.1.11]
Pyridoxine	35990	K00097	4-hydroxythreonine-4-phosphate dehydrogenase	[EC:1.1.1.262]
Pyridoxine		K00275	pyridoxamine 5'-phosphate oxidase	[EC:1.4.3.5]
Pyridoxine		K00831	phosphoserine aminotransferase	[EC:2.6.1.52]
Pyridoxine		K00868	pyridoxine kinase	[EC:2.7.1.35]
Pyridoxine		K01733	threonine synthase	[EC:4.2.3.1]
Pyridoxine		K03472	D-erythrose 4-phosphate dehydrogenase	[EC:1.2.1.72]
Pyridoxine		K03473	erythronate-4-phosphate dehydrogenase	[EC:1.1.1.290]
Pyridoxine		K03474	pyridoxine 5-phosphate synthase	[EC:2.6.99.2]
Pyridoxine		K05275	pyridoxine 4-dehydrogenase	[EC:1.1.1.65]
Pyridoxine		K06215	pyridoxal 5'-phosphate synthase pdxS subunit	[EC:4.3.3.6]
Pyridoxine		K08681	pyridoxal 5'-phosphate synthase pdxT subunit	[EC:4.3.3.6]
Pyridoxine		K18607	pyridoxine 4-oxidase	[EC:1.1.3.12]
Pyridoxine		K18608	pyridoxamine---pyruvate transaminase	[EC:2.6.1.30]
Riboflavin	48901	K00793	riboflavin synthase	[EC:2.5.1.9]
Riboflavin		K00794	6,7-dimethyl-8-ribityllumazine synthase	[EC:2.5.1.78]
Riboflavin		K00861	riboflavin kinase	[EC:2.7.1.26]
Riboflavin		K01093	4-phytase / acid phosphatase	[EC:3.1.3.26 3.1.3.2]
Riboflavin		K01497	GTP cyclohydrolase II	[EC:3.5.4.25]
Riboflavin		K02858	3,4-dihydroxy 2-butanone 4-phosphate synthase	[EC:4.1.99.12]
Riboflavin		K03788	acid phosphatase (class B)	[EC:3.1.3.2]
Riboflavin		K07732	riboflavin kinase, archaea type	[EC:2.7.1.161]
Riboflavin		K08096	GTP cyclohydrolase IIa	[EC:3.5.4.29]
Riboflavin		K09474	acid phosphatase (class A)	[EC:3.1.3.2]
Riboflavin		K11752	diaminohydroxyphosphoribosylaminopyrimidine deaminase / 5-amino-6-(5-phosphoribosylamino)uracil reductase	[EC:3.5.4.26 1.1.1.193]
Riboflavin		K11753	riboflavin kinase / FMN adenylyltransferase	[EC:2.7.1.26 2.7.7.2]
Riboflavin		K14379	tartrate-resistant acid phosphatase type 5	[EC:3.1.3.2]
Riboflavin		K14652	3,4-dihydroxy 2-butanone 4-phosphate synthase / GTP cyclohydrolase II	[EC:4.1.99.12 3.5.4.25]
Riboflavin		K14653	2-amino-5-formylamino-6-ribosylaminopyrimidin-4(3H)-one 5'-monophosphate deformylase	[EC:3.5.1.102]
Riboflavin		K14656	FAD synthetase	[EC:2.7.7.2]
Riboflavin		K20861	FMN hydrolase / 5-amino-6-(5-phospho-D-ribitylamino)uracil phosphatase	[EC:3.1.3.102 3.1.3.104]
Riboflavin		K20862	FMN hydrolase / 5-amino-6-(5-phospho-D-ribitylamino)uracil phosphatase	[EC:3.1.3.102 3.1.3.104]
Riboflavin		K20884	riboflavin kinase / FMN hydrolase	[EC:2.7.1.26 3.1.3.102]
Riboflavin		K21063	5-amino-6-(5-phospho-D-ribitylamino)uracil phosphatase	[EC:3.1.3.104]
Riboflavin		K21064	5-amino-6-(5-phospho-D-ribitylamino)uracil phosphatase	[EC:3.1.3.104]
Thiamine	80910	K00788	thiamine-phosphate pyrophosphorylase	[EC:2.5.1.3]
Thiamine		K00941	hydroxymethylpyrimidine/phosphomethylpyrimidine kinase	[EC:2.7.1.49 2.7.4.7]
Thiamine		K00946	thiamine-monophosphate kinase	[EC:2.7.4.16]
Thiamine		K00949	thiamine pyrophosphokinase	[EC:2.7.6.2]
Thiamine		K01077	alkaline phosphatase	[EC:3.1.3.1]
Thiamine		K01662	1-deoxy-D-xylulose-5-phosphate synthase	[EC:2.2.1.7]
Thiamine		K03147	phosphomethylpyrimidine synthase	[EC:4.1.99.17]
Thiamine		K03148	sulfur carrier protein ThiS adenylyltransferase	[EC:2.7.7.73]
Thiamine		K03149	thiazole synthase	[EC:2.8.1.10]
Thiamine		K03150	2-iminoacetate synthase	[EC:4.1.99.19]
Thiamine		K03151	tRNA uracil 4-sulfurtransferase	[EC:2.8.1.4]
Thiamine		K03153	glycine oxidase	[EC:1.4.3.19]
Thiamine		K04487	cysteine desulfurase	[EC:2.8.1.7]
Thiamine		K06928	nucleoside-triphosphatase	[EC:3.6.1.15]
Thiamine		K06949	ribosome biogenesis GTPase / thiamine phosphate phosphatase	[EC:3.6.1.- 3.1.3.100]
Thiamine		K07251	thiamine kinase	[EC:2.7.1.89]
Thiamine		K10810	thiazole tautomerase (transcriptional regulator TenI)	[EC:5.3.99.10]
Thiamine		K14153	hydroxymethylpyrimidine kinase / phosphomethylpyrimidine kinase / thiamine-phosphate diphosphorylase	[EC:2.7.1.49 2.7.4.7 2.5.1.3]
Thiamine		K21219	hydroxymethylpyrimidine kinase / phosphomethylpyrimidine kinase / thiamine-phosphate diphosphorylase	[EC:2.7.1.49 2.7.4.7 2.5.1.3]
Thiamine		K21220	thiamine-phosphate diphosphorylase	[EC:2.5.1.3]
Thiamine		K22699	sulfide-dependent adenosine diphosphate thiazole synthase	[EC:2.4.2.59]

## Sheet: Supplementary Table 3
Supplementary Table 3. Taxonomic classification of 3,522 high-quality genomes, including their respective categories and levels.
Genome name	Vitamin biosynthesis capability	Phlyogenetic taxonomy
		Phylum	Class	Order	Family	Genus	Species
H1682	YES	p__Bacillota_A	c__Clostridia	o__Lachnospirales	f__Lachnospiraceae	g__Enterocloster	s__Enterocloster clostridioformis
HJ20.bin.43	YES	p__Bacillota_A	c__Clostridia	o__Lachnospirales	f__Lachnospiraceae	g__MGBC164599	s__MGBC164599 sp910575625
S5.bin.12	YES	p__Bacillota_A	c__Clostridia	o__Lachnospirales	f__Lachnospiraceae	g__MGBC164599	s__
SRR11425441.bin.21	YES	p__Bacteroidota	c__Bacteroidia	o__Bacteroidales	f__Muribaculaceae	g__CAG-485	s__
HJ8.bin.120	YES	p__Bacillota_A	c__Clostridia	o__Peptostreptococcales	f__Anaerovoracaceae	g__Zhenpiania	s__
HJX3.bin.6	YES	p__Deferribacterota	c__Deferribacteres	o__Deferribacterales	f__Mucispirillaceae	g__Mucispirillum	s__
MF6.bin.76	YES	p__Bacteroidota	c__Bacteroidia	o__Bacteroidales	f__Muribaculaceae	g__CAG-873	s__
H779	YES	p__Pseudomonadota	c__Gammaproteobacteria	o__Enterobacterales	f__Enterobacteriaceae	g__Escherichia	s__Escherichia coli
HXJS1.bin.69	YES	p__Bacteroidota	c__Bacteroidia	o__Bacteroidales	f__Muribaculaceae	g__Paramuribaculum	s__
HJ11.bin.259	YES	p__Desulfobacterota	c__Desulfovibrionia	o__Desulfovibrionales	f__Desulfovibrionaceae	g__Desulfovibrio	s__
HJX2.bin.8	YES	p__Bacillota_A	c__Clostridia	o__Lachnospirales	f__Lachnospiraceae	g__1XD42-69	s__
RF6.bin.66	YES	p__Bacillota_A	c__Clostridia	o__Oscillospirales	f__Acutalibacteraceae	g__	s__
HJ2.bin.45	YES	p__Actinomycetota	c__Coriobacteriia	o__Coriobacteriales	f__Eggerthellaceae	g__Adlercreutzia	s__
SRR23368216.bin.4	YES	p__Bacillota_A	c__Clostridia	o__Oscillospirales	f__Acutalibacteraceae	g__Ruminococcus_E	s__
FDSW210084421_12MC.bin.87	YES	p__Bacteroidota	c__Bacteroidia	o__Bacteroidales	f__Muribaculaceae	g__CAG-485	s__
SRR11852057.bin.7	YES	p__Bacteroidota	c__Bacteroidia	o__Bacteroidales	f__P3	g__Phil12	s__Phil12 sp021443125
BSTS18.bin.30	YES	p__Bacillota_A	c__Clostridia	o__Lachnospirales	f__Lachnospiraceae	g__JAAVZI01	s__
RF17.bin.89	YES	p__Bacteroidota	c__Bacteroidia	o__Bacteroidales	f__Bacteroidaceae	g__Prevotella	s__
ERR3357635.bin.25	YES	p__Pseudomonadota	c__Gammaproteobacteria	o__Enterobacterales	f__Enterobacteriaceae	g__Escherichia	s__Escherichia ruysiae
SRR21350760.bin.25	YES	p__Bacteroidota	c__Bacteroidia	o__Bacteroidales	f__Muribaculaceae	g__CAG-873	s__
RNX2.bin.65	YES	p__Bacillota_A	c__Clostridia	o__Clostridiales	f__Clostridiaceae	g__Clostridium_S	s__
DX29	YES	p__Bacillota	c__Bacilli	o__Bacillales	f__Planococcaceae	g__Sporosarcina	s__
SRR14411253.bin.26	YES	p__Bacteroidota	c__Bacteroidia	o__Bacteroidales	f__Muribaculaceae	g__Paramuribaculum	s__
SRR23960625.bin.13	YES	p__Bacteroidota	c__Bacteroidia	o__Bacteroidales	f__Rikenellaceae	g__Alistipes	s__
M1.bin.58	YES	p__Bacteroidota	c__Bacteroidia	o__Bacteroidales	f__Muribaculaceae	g__CAG-485	s__
SRR11425453.bin.35	YES	p__Bacteroidota	c__Bacteroidia	o__Bacteroidales	f__Muribaculaceae	g__CAG-873	s__CAG-873 sp014801485
H219	YES	p__Pseudomonadota	c__Gammaproteobacteria	o__Enterobacterales	f__Enterobacteriaceae	g__Proteus	s__Proteus mirabilis
SRR23368203.bin.13	YES	p__Bacillota_A	c__Clostridia	o__Oscillospirales	f__Acutalibacteraceae	g__Eubacterium_R	s__
ERR3357621.bin.38	YES	p__Bacteroidota	c__Bacteroidia	o__Bacteroidales	f__Marinifilaceae	g__Odoribacter	s__Odoribacter sp009935865
SRR3997455.bin.7	YES	p__Bacillota_A	c__Clostridia	o__Lachnospirales	f__Lachnospiraceae	g__CAG-303	s__
HJ6.bin.69	YES	p__Bacillota_A	c__Clostridia	o__Peptostreptococcales	f__Anaerovoracaceae	g__Zhenpiania	s__
M14.bin.104	YES	p__Bacteroidota	c__Bacteroidia	o__Bacteroidales	f__Bacteroidaceae	g__Phocaeicola	s__Phocaeicola sp900544075
BV7.H.bin.109	YES	p__Desulfobacterota	c__Desulfovibrionia	o__Desulfovibrionales	f__Desulfovibrionaceae	g__Desulfovibrio	s__
HJ12.bin.88	YES	p__Desulfobacterota	c__Desulfovibrionia	o__Desulfovibrionales	f__Desulfovibrionaceae	g__Mailhella	s__
RN1.bin.53	YES	p__Bacillota_C	c__Negativicutes	o__Acidaminococcales	f__Acidaminococcaceae	g__Phascolarctobacterium_A	s__
RN3.bin.5	YES	p__Bacillota_A	c__Clostridia	o__Peptostreptococcales	f__Anaerovoracaceae	g__Lentihominibacter	s__Lentihominibacter sp022780965
H1225	YES	p__Pseudomonadota	c__Gammaproteobacteria	o__Enterobacterales	f__Enterobacteriaceae	g__Mixta	s__Mixta calida
RF13.bin.18	YES	p__Bacteroidota	c__Bacteroidia	o__Bacteroidales	f__Paludibacteraceae	g__RF16	s__
RNX1.bin.163	YES	p__Bacteroidota	c__Bacteroidia	o__Bacteroidales	f__UBA932	g__Cryptobacteroides	s__
HJ13.bin.139	YES	p__Bacillota_A	c__Clostridia	o__Lachnospirales	f__Lachnospiraceae	g__UBA3282	s__
RNX5.bin.32	YES	p__Bacteroidota	c__Bacteroidia	o__Bacteroidales	f__Bacteroidaceae	g__Prevotella	s__
SRR11425447.bin.23	YES	p__Bacteroidota	c__Bacteroidia	o__Bacteroidales	f__Muribaculaceae	g__Duncaniella	s__Duncaniella sp014801945
SRR14411294.bin.12	YES	p__Bacillota_A	c__Clostridia	o__Oscillospirales	f__Ruminococcaceae	g__Ruminococcus	s__
HJ6.bin.10	YES	p__Bacillota_A	c__Clostridia	o__Oscillospirales	f__Oscillospiraceae	g__	s__
MF7.bin.61	YES	p__Bacteroidota	c__Bacteroidia	o__Bacteroidales	f__Rikenellaceae	g__Alistipes	s__
SRR21474237.bin.65	YES	p__Bacteroidota	c__Bacteroidia	o__Bacteroidales	f__Muribaculaceae	g__UBA3263	s__
M7.bin.81	YES	p__Bacillota_A	c__Clostridia	o__Lachnospirales	f__Lachnospiraceae	g__UBA3282	s__
RN13.bin.42	YES	p__Bacillota_A	c__Clostridia	o__Lachnospirales	f__Lachnospiraceae	g__14-2	s__
M13.bin.76	YES	p__Bacillota_A	c__Clostridia	o__Lachnospirales	f__Lachnospiraceae	g__CAG-317	s__
ERR3357641.bin.30	YES	p__Bacillota_A	c__Clostridia	o__Christensenellales	f__Borkfalkiaceae	g__Gallimonas	s__Gallimonas sp910578065
SRR13490895.bin.55	YES	p__Bacteroidota	c__Bacteroidia	o__Bacteroidales	f__Marinifilaceae	g__Butyricimonas	s__
MF51	YES	p__Pseudomonadota	c__Gammaproteobacteria	o__Enterobacterales	f__Enterobacteriaceae	g__Kosakonia	s__Kosakonia radicincitans
ERR3357644.bin.48	YES	p__Bacillota_A	c__Clostridia	o__Oscillospirales	f__Butyricicoccaceae	g__QXXE01	s__QXXE01 sp009911355
RN12.bin.133	YES	p__Bacillota_A	c__Clostridia	o__Lachnospirales	f__Lachnospiraceae	g__Faecalimonas	s__
ERR3357625.bin.6	YES	p__Bacillota_A	c__Clostridia	o__Lachnospirales	f__Lachnospiraceae	g__Butyribacter	s__Butyribacter sp009774235
SRR23960623.bin.15	YES	p__Bacteroidota	c__Bacteroidia	o__Bacteroidales	f__Muribaculaceae	g__UBA3263	s__
SRR23368205.bin.38	YES	p__Bacillota_A	c__Clostridia	o__Oscillospirales	f__Acutalibacteraceae	g__Fimenecus	s__
M15.bin.56	YES	p__Bacillota_A	c__Clostridia	o__Peptostreptococcales	f__Anaerovoracaceae	g__Emergencia	s__Emergencia sp022767345
ERR3357637.bin.69	YES	p__Bacillota_A	c__Clostridia	o__Lachnospirales	f__Lachnospiraceae	g__Ventrimonas	s__Ventrimonas sp009911065
ERR3357626.bin.90	YES	p__Bacillota_A	c__Clostridia	o__Lachnospirales	f__Lachnospiraceae	g__Lachnospira	s__Lachnospira sp910589305
RN15.bin.105	YES	p__Bacillota_A	c__Clostridia	o__Oscillospirales	f__Acutalibacteraceae	g__Eubacterium_R	s__Eubacterium_R sp910577195
BSTS11.bin.138	YES	p__Bacteroidota	c__Bacteroidia	o__Bacteroidales	f__Muribaculaceae	g__CAG-873	s__
HJ10.bin.130	YES	p__Actinomycetota	c__Coriobacteriia	o__Coriobacteriales	f__Eggerthellaceae	g__Enterorhabdus	s__
ERR3357625.bin.37	YES	p__Bacillota_A	c__Clostridia	o__Lachnospirales	f__Lachnospiraceae	g__UBA3282	s__UBA3282 sp910577735
BV6.H.bin.59	YES	p__Bacteroidota	c__Bacteroidia	o__Bacteroidales	f__Muribaculaceae	g__CAG-485	s__
HJ15.bin.40	YES	p__Bacteroidota	c__Bacteroidia	o__Bacteroidales	f__Muribaculaceae	g__Duncaniella	s__Duncaniella sp910578445
SRR23368201.bin.61	YES	p__Bacillota_A	c__Clostridia	o__Lachnospirales	f__Lachnospiraceae	g__Schaedlerella	s__
SRR11425449.bin.56	YES	p__Bacteroidota	c__Bacteroidia	o__Bacteroidales	f__P3	g__Pullibacteroides	s__
SRR11425466.bin.5	YES	p__Bacteroidota	c__Bacteroidia	o__Bacteroidales	f__Muribaculaceae	g__CAG-873	s__
SRR23368204.bin.23	YES	p__Bacillota_A	c__Clostridia	o__Oscillospirales	f__Acutalibacteraceae	g__Eubacterium_R	s__
BV9.H.bin.52	YES	p__Bacillota_A	c__Clostridia	o__Oscillospirales	f__Ruminococcaceae	g__Ruminiclostridium_E	s__
RNX10.bin.47	YES	p__Bacteroidota	c__Bacteroidia	o__Bacteroidales	f__Rikenellaceae	g__Alistipes	s__Alistipes finegoldii
HJX8.bin.47	YES	p__Campylobacterota	c__Campylobacteria	o__Campylobacterales	f__Helicobacteraceae	g__Helicobacter_D	s__
SRR23368217.bin.12	YES	p__Bacillota_A	c__Clostridia	o__Oscillospirales	f__Ruminococcaceae	g__UMGS1601	s__
SRR21474233.bin.100	YES	p__Deferribacterota	c__Deferribacteres	o__Deferribacterales	f__Mucispirillaceae	g__Mucispirillum	s__
H477	YES	p__Pseudomonadota	c__Gammaproteobacteria	o__Burkholderiales	f__Burkholderiaceae_C	g__Achromobacter	s__
BV23.bin.69	YES	p__Bacillota_A	c__Clostridia	o__Oscillospirales	f__Ruminococcaceae	g__RGIG8773	s__
SRR23368209.bin.7	YES	p__Bacillota_A	c__Clostridia	o__Lachnospirales	f__Lachnospiraceae	g__Acetatifactor	s__
SRR13490896.bin.28	YES	p__Bacteroidota	c__Bacteroidia	o__Bacteroidales	f__Muribaculaceae	g__UBA7173	s__
BSTS5.bin.90	YES	p__Bacteroidota	c__Bacteroidia	o__Bacteroidales	f__Muribaculaceae	g__CAG-485	s__
BV21.bin.89	YES	p__Bacteroidota	c__Bacteroidia	o__Bacteroidales	f__Muribaculaceae	g__CAG-873	s__
SRR23960623.bin.30	YES	p__Verrucomicrobiota	c__Verrucomicrobiae	o__Verrucomicrobiales	f__Akkermansiaceae	g__Akkermansia	s__
SRR14411330.bin.19	YES	p__Bacillota_A	c__Clostridia	o__Christensenellales	f__Borkfalkiaceae	g__Coproplasma	s__
SRR11425462.bin.13	YES	p__Bacteroidota	c__Bacteroidia	o__Bacteroidales	f__Muribaculaceae	g__CAG-873	s__
MF12.bin.68	YES	p__Bacteroidota	c__Bacteroidia	o__Bacteroidales	f__Bacteroidaceae	g__UBA4334	s__
MF12.bin.120	YES	p__Bacteroidota	c__Bacteroidia	o__Bacteroidales	f__Muribaculaceae	g__UBA3263	s__
M16.bin.45	YES	p__Bacillota_C	c__Negativicutes	o__Acidaminococcales	f__Acidaminococcaceae	g__Phascolarctobacterium_A	s__Phascolarctobacterium_A sp900757795
BSTS12.bin.17	YES	p__Bacillota_A	c__Clostridia	o__Lachnospirales	f__Lachnospiraceae	g__Eubacterium_F	s__
SRR9205167.bin.47	YES	p__Bacillota_A	c__Clostridia	o__Lachnospirales	f__Lachnospiraceae	g__1XD42-69	s__1XD42-69 sp011959925
MF62	YES	p__Bacillota	c__Bacilli	o__Bacillales_G	f__Fictibacillaceae	g__Fictibacillus	s__
HXJS2.bin.3	YES	p__Bacteroidota	c__Bacteroidia	o__Bacteroidales	f__Muribaculaceae	g__CAG-873	s__
BV12.bin.20	YES	p__Bacillota_A	c__Clostridia	o__Lachnospirales	f__Lachnospiraceae	g__1XD42-69	s__
HJ8.bin.77	YES	p__Bacteroidota	c__Bacteroidia	o__Bacteroidales	f__Muribaculaceae	g__CAG-1031	s__
SRR9205167.bin.67	YES	p__Bacillota_A	c__Clostridia	o__Lachnospirales	f__Lachnospiraceae	g__Butyribacter	s__Butyribacter sp910588655
ERR3357634.bin.41	YES	p__Bacillota_A	c__Clostridia	o__Oscillospirales	f__Ruminococcaceae	g__Ruminiclostridium_E	s__Ruminiclostridium_E sp910585505
ERR3357629.bin.34	YES	p__Desulfobacterota	c__Desulfovibrionia	o__Desulfovibrionales	f__Desulfovibrionaceae	g__Mailhella	s__Mailhella sp003512875
BSTS18.bin.47	YES	p__Desulfobacterota	c__Desulfovibrionia	o__Desulfovibrionales	f__Desulfovibrionaceae	g__Desulfovibrio	s__
HJ11.bin.80	YES	p__Bacillota	c__Bacilli	o__Lactobacillales	f__Streptococcaceae	g__Streptococcus	s__Streptococcus sp004570525
BSTS3.bin.145	YES	p__Bacteroidota	c__Bacteroidia	o__Bacteroidales	f__Muribaculaceae	g__CAG-1031	s__
HJ16.bin.31	YES	p__Bacteroidota	c__Bacteroidia	o__Bacteroidales	f__Rikenellaceae	g__Alistipes	s__
RNX5.bin.76	YES	p__Pseudomonadota	c__Gammaproteobacteria	o__Burkholderiales	f__Burkholderiaceae_B	g__Saezia	s__Saezia sanguinis
ERR3357639.bin.31	YES	p__Bacillota_A	c__Clostridia	o__Oscillospirales	f__Acutalibacteraceae	g__Eubacterium_R	s__Eubacterium_R sp910577215
MF11	YES	p__Pseudomonadota	c__Gammaproteobacteria	o__Enterobacterales	f__Enterobacteriaceae	g__Morganella	s__Morganella morganii_A
SRR23368212.bin.49	YES	p__Bacillota_A	c__Clostridia	o__Oscillospirales	f__Acutalibacteraceae	g__Fimenecus	s__
RN2.bin.6	YES	p__Actinomycetota	c__Actinomycetia	o__Propionibacteriales	f__Propionibacteriaceae	g__Luteococcus	s__Luteococcus japonicus
DF3.bin.43	YES	p__Bacteroidota	c__Bacteroidia	o__Bacteroidales	f__Muribaculaceae	g__CAG-485	s__
SRR23960626.bin.16	YES	p__Bacteroidota	c__Bacteroidia	o__Bacteroidales	f__Muribaculaceae	g__CAG-485	s__
HJ3.bin.205	YES	p__Bacteroidota	c__Bacteroidia	o__Bacteroidales	f__Paludibacteraceae	g__RF16	s__
S1.bin.46	YES	p__Desulfobacterota	c__Desulfovibrionia	o__Desulfovibrionales	f__Desulfovibrionaceae	g__Desulfovibrio	s__
SRR13490894.bin.113	YES	p__Bacteroidota	c__Bacteroidia	o__Bacteroidales	f__Tannerellaceae	g__Parabacteroides	s__Parabacteroides johnsonii
SRR21350690.bin.23	YES	p__Bacteroidota	c__Bacteroidia	o__Bacteroidales	f__Muribaculaceae	g__Muribaculum	s__
SRR11425446.bin.46	YES	p__Bacteroidota	c__Bacteroidia	o__Bacteroidales	f__Muribaculaceae	g__Paramuribaculum	s__Paramuribaculum sp014800945
SRR21474238.bin.23	YES	p__Bacteroidota	c__Bacteroidia	o__Bacteroidales	f__Muribaculaceae	g__CAG-485	s__
BSTS17.bin.95	YES	p__Actinomycetota	c__Actinomycetia	o__Mycobacteriales	f__Mycobacteriaceae	g__Corynebacterium	s__
FDSW210084435_8.bin.98	YES	p__Cyanobacteriota	c__Vampirovibrionia	o__Gastranaerophilales	f__Gastranaerophilaceae	g__Stercorousia	s__
MF16.bin.58	YES	p__Bacteroidota	c__Bacteroidia	o__Bacteroidales	f__Muribaculaceae	g__UBA7173	s__
BV12.bin.48	YES	p__Bacteroidota	c__Bacteroidia	o__Bacteroidales	f__Bacteroidaceae	g__Prevotella	s__
MF16.bin.47	YES	p__Bacteroidota	c__Bacteroidia	o__Bacteroidales	f__Rikenellaceae	g__Alistipes	s__
HJ16.bin.69	YES	p__Bacteroidota	c__Bacteroidia	o__Bacteroidales	f__Bacteroidaceae	g__Bacteroides	s__
SRR11425446.bin.3	YES	p__Spirochaetota	c__Spirochaetia	o__Treponematales	f__Treponemataceae	g__Treponema_D	s__Treponema_D sp014803985
BV14.H.bin.120	YES	p__Bacteroidota	c__Bacteroidia	o__Bacteroidales	f__Muribaculaceae	g__CAG-873	s__
SRR11425439.bin.4	YES	p__Spirochaetota	c__Spirochaetia	o__Treponematales	f__Treponemataceae	g__Treponema_D	s__Treponema_D sp014803985
HJ6.bin.50	YES	p__Bacillota_A	c__Clostridia	o__Christensenellales	f__Borkfalkiaceae	g__Coproplasma	s__
FDSW210084437_10.bin.56	YES	p__Bacillota_A	c__Clostridia	o__Oscillospirales	f__Ruminococcaceae	g__RGIG8773	s__
SRR13490890.bin.13	YES	p__Verrucomicrobiota	c__Verrucomicrobiae	o__Verrucomicrobiales	f__Akkermansiaceae	g__Akkermansia	s__
BV20.bin.37	YES	p__Pseudomonadota	c__Gammaproteobacteria	o__Enterobacterales	f__Enterobacteriaceae	g__Enterobacter	s__Enterobacter mori
SRR11425441.bin.20	YES	p__Bacteroidota	c__Bacteroidia	o__Bacteroidales	f__Muribaculaceae	g__CAG-1031	s__CAG-1031 sp014802445
M18.bin.57	YES	p__Bacillota_A	c__Clostridia	o__Lachnospirales	f__Lachnospiraceae	g__Schaedlerella	s__
M4.bin.67	YES	p__Bacillota_A	c__Clostridia	o__Peptostreptococcales	f__Anaerovoracaceae	g__Lentihominibacter	s__
SRR21350761.bin.9	YES	p__Bacteroidota	c__Bacteroidia	o__Bacteroidales	f__Muribaculaceae	g__Duncaniella	s__
HJ7.bin.89	YES	p__Bacteroidota	c__Bacteroidia	o__Bacteroidales	f__UBA932	g__Cryptobacteroides	s__
SRR23368202.bin.29	YES	p__Bacillota_A	c__Clostridia	o__Oscillospirales	f__Ruminococcaceae	g__	s__
SRR21474235.bin.8	YES	p__Bacillota_A	c__Clostridia	o__Christensenellales	f__Borkfalkiaceae	g__Gallimonas	s__
HJ14.bin.253	YES	p__Bacillota_A	c__Clostridia	o__Lachnospirales	f__Lachnospiraceae	g__RUG115	s__
RF6.bin.22	YES	p__Bacillota_A	c__Clostridia	o__Oscillospirales	f__Acutalibacteraceae	g__Eubacterium_R	s__Eubacterium_R sp002493325
RNX10.bin.41	YES	p__Bacillota	c__Bacilli	o__Erysipelotrichales	f__Erysipelotrichaceae	g__Clostridium_AQ	s__Clostridium_AQ innocuum
ERR3357633.bin.66	YES	p__Bacillota_A	c__Clostridia	o__Lachnospirales	f__Lachnospiraceae	g__Lachnospira	s__Lachnospira sp910589305
RN10.bin.70	YES	p__Bacillota_A	c__Clostridia	o__Lachnospirales	f__Lachnospiraceae	g__UBA9414	s__UBA9414 sp003458885
M17.bin.61	YES	p__Bacillota_A	c__Clostridia	o__Peptostreptococcales	f__Anaerovoracaceae	g__Emergencia	s__Emergencia sp022767345
HJ3.bin.273	YES	p__Bacteroidota	c__Bacteroidia	o__Bacteroidales	f__Rikenellaceae	g__Alistipes	s__
DF15.bin.51	YES	p__Bacteroidota	c__Bacteroidia	o__Bacteroidales	f__Muribaculaceae	g__CAG-485	s__
H930	YES	p__Actinomycetota	c__Actinomycetia	o__Mycobacteriales	f__Mycobacteriaceae	g__Nocardia	s__
ERR3357624.bin.53	YES	p__Bacillota_A	c__Clostridia	o__Christensenellales	f__Borkfalkiaceae	g__Coproplasma	s__Coproplasma sp910577555
DF10.bin.63	YES	p__Desulfobacterota	c__Desulfovibrionia	o__Desulfovibrionales	f__Desulfovibrionaceae	g__Desulfovibrio	s__
M2.bin.62	YES	p__Bacillota_A	c__Clostridia	o__Oscillospirales	f__Ruminococcaceae	g__CAKSAY01	s__
BSTS1.bin.20	YES	p__Bacteroidota	c__Bacteroidia	o__Bacteroidales	f__Muribaculaceae	g__Paramuribaculum	s__
MF19.bin.43	YES	p__Bacteroidota	c__Bacteroidia	o__Bacteroidales	f__P3	g__Pullibacteroides	s__
DF14.bin.55	YES	p__Bacillota_A	c__Clostridia	o__Oscillospirales	f__Ruminococcaceae	g__CAG-115	s__
RNX1.bin.111	YES	p__Bacillota_A	c__Clostridia	o__Lachnospirales	f__Lachnospiraceae	g__Butyribacter	s__
SRR23368210.bin.26	YES	p__Bacillota_A	c__Clostridia	o__Oscillospirales	f__Ruminococcaceae	g__UBA1394	s__
SRR10605902.bin.1	YES	p__Pseudomonadota	c__Gammaproteobacteria	o__Diplorickettsiales	f__Diplorickettsiaceae	g__Aquirickettsiella	s__Aquirickettsiella isopodorum
ERR3357627.bin.73	YES	p__Campylobacterota	c__Campylobacteria	o__Campylobacterales	f__Helicobacteraceae	g__Helicobacter_D	s__Helicobacter_D ganmani
RF12.bin.9	YES	p__Bacillota_B	c__Peptococcia	o__Peptococcales	f__Peptococcaceae	g__UMGS1590	s__UMGS1590 sp900553245
SRR23368213.bin.15	YES	p__Bacillota_A	c__Clostridia	o__UBA1381	f__UBA1381	g__Ornithomonoglobus	s__
RN9.bin.120	YES	p__Bacteroidota	c__Bacteroidia	o__Bacteroidales	f__Muribaculaceae	g__CAG-873	s__
FDSW210084442_16.bin.56	YES	p__Bacillota_A	c__Clostridia	o__UBA1381	f__UBA1381	g__CAG-41	s__
ERR3357621.bin.62	YES	p__Bacillota_A	c__Clostridia	o__Lachnospirales	f__Lachnospiraceae	g__Butyribacter	s__Butyribacter sp009774235
SRR14411261.bin.30	YES	p__Bacteroidota	c__Bacteroidia	o__Bacteroidales	f__P3	g__Pullibacteroides	s__
G1.bin.10	YES	p__Desulfobacterota	c__Desulfovibrionia	o__Desulfovibrionales	f__Desulfovibrionaceae	g__Desulfovibrio	s__
MF6.bin.95	YES	p__Bacillota_A	c__Clostridia	o__Oscillospirales	f__Ruminococcaceae	g__Ruminiclostridium_E	s__
BSTS2.bin.77	YES	p__Bacteroidota	c__Bacteroidia	o__Bacteroidales	f__Bacteroidaceae	g__UBA4334	s__
SRR23368209.bin.73	YES	p__Bacteroidota	c__Bacteroidia	o__Bacteroidales	f__Muribaculaceae	g__UBA3263	s__
HXJS4.bin.25	YES	p__Bacteroidota	c__Bacteroidia	o__Bacteroidales	f__Muribaculaceae	g__Duncaniella	s__
HJ16.bin.34	YES	p__Bacteroidota	c__Bacteroidia	o__Bacteroidales	f__Muribaculaceae	g__Duncaniella	s__
FDSW210084442_16.bin.68	YES	p__Bacillota_A	c__Clostridia	o__Christensenellales	f__Borkfalkiaceae	g__Coproplasma	s__
ERR3357634.bin.4	YES	p__Bacteroidota	c__Bacteroidia	o__Bacteroidales	f__Marinifilaceae	g__Odoribacter	s__Odoribacter sp910589025
BV28.bin.33	YES	p__Bacteroidota	c__Bacteroidia	o__Bacteroidales	f__P3	g__Pullibacteroides	s__
SRR21474242.bin.72	YES	p__Bacillota_A	c__Clostridia	o__Lachnospirales	f__Lachnospiraceae	g__Wujia	s__
HJX8.bin.37	YES	p__Desulfobacterota	c__Desulfovibrionia	o__Desulfovibrionales	f__Desulfovibrionaceae	g__Desulfovibrio	s__
HJ16.bin.119	YES	p__Bacteroidota	c__Bacteroidia	o__Bacteroidales	f__Rikenellaceae	g__Rikenella	s__
BV4.bin.143	YES	p__Bacillota_A	c__Clostridia	o__Oscillospirales	f__Acutalibacteraceae	g__UBA6857	s__
HJX2.bin.70	YES	p__Bacillota_A	c__Clostridia	o__Christensenellales	f__UBA3700	g__MGBC100798	s__
HXJS4.bin.1	YES	p__Bacteroidota	c__Bacteroidia	o__Bacteroidales	f__Muribaculaceae	g__CAG-873	s__
M10.bin.8	YES	p__Bacteroidota	c__Bacteroidia	o__Bacteroidales	f__Bacteroidaceae	g__Prevotella	s__
SRR14411339.bin.21	YES	p__Bacillota_A	c__Clostridia	o__Lachnospirales	f__Lachnospiraceae	g__COE1	s__COE1 sp910579275
RNX3.bin.121	YES	p__Bacteroidota	c__Bacteroidia	o__Bacteroidales	f__Muribaculaceae	g__CAG-485	s__
DF12.bin.24	YES	p__Bacillota_A	c__Clostridia	o__Oscillospirales	f__Ruminococcaceae	g__Ruminiclostridium_E	s__
HJ8.bin.128	YES	p__Bacteroidota	c__Bacteroidia	o__Bacteroidales	f__Rikenellaceae	g__Alistipes	s__
SRR13890103.bin.34	YES	p__Bacteroidota	c__Bacteroidia	o__Bacteroidales	f__P3	g__Pullibacteroides	s__
HJX1.bin.104	YES	p__Bacteroidota	c__Bacteroidia	o__Bacteroidales	f__Marinifilaceae	g__Butyricimonas	s__Butyricimonas synergistica
M8.bin.86	YES	p__Bacillota	c__Bacilli	o__Lactobacillales	f__Lactobacillaceae	g__Lactiplantibacillus	s__Lactiplantibacillus plantarum
DF11.bin.79	YES	p__Bacteroidota	c__Bacteroidia	o__Bacteroidales	f__Bacteroidaceae	g__UBA4372	s__
BV3.bin.10	YES	p__Bacteroidota	c__Bacteroidia	o__Bacteroidales	f__Muribaculaceae	g__CAG-485	s__
HJ8.bin.7	YES	p__Desulfobacterota	c__Desulfovibrionia	o__Desulfovibrionales	f__Desulfovibrionaceae	g__Mailhella	s__
MF11.bin.29	YES	p__Bacteroidota	c__Bacteroidia	o__Bacteroidales	f__P3	g__Pullibacteroides	s__
RF17.bin.79	YES	p__Bacillota	c__Bacilli	o__Erysipelotrichales	f__Coprobacillaceae	g__Faecalibacillus	s__Faecalibacillus intestinalis
SRR23368205.bin.54	YES	p__Cyanobacteriota	c__Vampirovibrionia	o__Gastranaerophilales	f__RUG14156	g__RUG14156	s__
FDSW210084421_12MC.bin.34	YES	p__Desulfobacterota	c__Desulfovibrionia	o__Desulfovibrionales	f__Desulfovibrionaceae	g__Desulfovibrio	s__Desulfovibrio sp011039085
HJ4.bin.91	YES	p__Bacteroidota	c__Bacteroidia	o__Bacteroidales	f__P3	g__Pullibacteroides	s__
SRR9205134.bin.56	YES	p__Bacillota_A	c__Clostridia	o__Christensenellales	f__Borkfalkiaceae	g__Coproplasma	s__Coproplasma sp910585705
HJ17.bin.77	YES	p__Bacteroidota	c__Bacteroidia	o__Bacteroidales	f__P3	g__Pullibacteroides	s__
RN18.bin.121	YES	p__Bacillota_A	c__Clostridia	o__Oscillospirales	f__Acutalibacteraceae	g__Eubacterium_R	s__Eubacterium_R sp014465955
RNX5.bin.141	YES	p__Bacteroidota	c__Bacteroidia	o__Bacteroidales	f__Bacteroidaceae	g__Prevotella	s__Prevotella sp905216025
ERR3357628.bin.85	YES	p__Bacillota_A	c__Clostridia	o__Lachnospirales	f__Lachnospiraceae	g__MGBC143606	s__MGBC143606 sp910587935
HJ19.bin.49	YES	p__Bacteroidota	c__Bacteroidia	o__Bacteroidales	f__Muribaculaceae	g__Duncaniella	s__
SRR11425451.bin.39	YES	p__Spirochaetota	c__Spirochaetia	o__Treponematales	f__Treponemataceae	g__Treponema_D	s__Treponema_D sp014803985
SRR21474244.bin.18	YES	p__Bacillota_A	c__Clostridia	o__Lachnospirales	f__Lachnospiraceae	g__RGIG6919	s__
RNX4.bin.122	YES	p__Bacteroidota	c__Bacteroidia	o__Bacteroidales	f__Muribaculaceae	g__UBA7173	s__
SRR13490895.bin.91	YES	p__Bacteroidota	c__Bacteroidia	o__Bacteroidales	f__Bacteroidaceae	g__Phocaeicola	s__
BV24.bin.147	YES	p__Desulfobacterota	c__Desulfovibrionia	o__Desulfovibrionales	f__Desulfovibrionaceae	g__Desulfovibrio	s__
M9.bin.26	YES	p__Bacillota_A	c__Clostridia	o__Peptostreptococcales	f__Peptostreptococcaceae	g__Peptacetobacter	s__
MF42	YES	p__Pseudomonadota	c__Gammaproteobacteria	o__Enterobacterales	f__Enterobacteriaceae	g__Enterobacter	s__Enterobacter hormaechei_A
M1.bin.11	YES	p__Bacillota_A	c__Clostridia	o__Lachnospirales	f__Lachnospiraceae	g__Wujia	s__
SRR14411288.bin.3	YES	p__Bacillota_A	c__Clostridia	o__Christensenellales	f__Borkfalkiaceae	g__Coproplasma	s__
BSTS3.bin.99	YES	p__Bacteroidota	c__Bacteroidia	o__Bacteroidales	f__Muribaculaceae	g__CAG-485	s__
RN8.bin.31	YES	p__Bacillota	c__Bacilli	o__Lactobacillales	f__Lactobacillaceae	g__Lactobacillus	s__Lactobacillus hominis
SRR13490888.bin.89	YES	p__Bacillota_A	c__Clostridia	o__Lachnospirales	f__Lachnospiraceae	g__1XD8-76	s__
M14.bin.8	YES	p__Bacillota_A	c__Clostridia	o__Oscillospirales	f__Acutalibacteraceae	g__Ruminococcus_E	s__Ruminococcus_E sp002491825
DF5.bin.97	YES	p__Bacillota_A	c__Clostridia	o__Oscillospirales	f__Ruminococcaceae	g__CAG-115	s__
BSTS1.bin.18	YES	p__Bacteroidota	c__Bacteroidia	o__Bacteroidales	f__Muribaculaceae	g__CAG-485	s__
FDSW210084435_8.bin.103	YES	p__Bacillota_A	c__Clostridia	o__Lachnospirales	f__Lachnospiraceae	g__Hominisplanchenecus	s__
HXJS4.bin.58	YES	p__Bacteroidota	c__Bacteroidia	o__Bacteroidales	f__Muribaculaceae	g__Duncaniella	s__Duncaniella sp910578445
H325	YES	p__Bacillota	c__Bacilli	o__Bacillales	f__DSM-18226	g__Niallia	s__Niallia sp001076885
SRR11425430.bin.22	YES	p__Bacteroidota	c__Bacteroidia	o__Bacteroidales	f__Muribaculaceae	g__CAG-485	s__CAG-485 sp014801535
SRR11425450.bin.29	YES	p__Bacillota_A	c__Clostridia	o__Oscillospirales	f__Acutalibacteraceae	g__Eubacterium_R	s__Eubacterium_R sp014799585
SRR10605906.bin.74	YES	p__Bacillota_A	c__Clostridia	o__Lachnospirales	f__Lachnospiraceae	g__MGBC143606	s__
BV3.bin.126	YES	p__Bacteroidota	c__Bacteroidia	o__Bacteroidales	f__Muribaculaceae	g__CAG-873	s__
M1.bin.39	YES	p__Bacteroidota	c__Bacteroidia	o__Bacteroidales	f__Muribaculaceae	g__Paramuribaculum	s__
BV4.bin.113	YES	p__Bacteroidota	c__Bacteroidia	o__Bacteroidales	f__Muribaculaceae	g__Paramuribaculum	s__
ERR3357627.bin.37	YES	p__Bacillota_A	c__Clostridia	o__Lachnospirales	f__Lachnospiraceae	g__Sporofaciens	s__Sporofaciens sp910579015
M13.bin.50	YES	p__Bacteroidota	c__Bacteroidia	o__Bacteroidales	f__Muribaculaceae	g__Paramuribaculum	s__
RF1.bin.26	YES	p__Bacillota	c__Bacilli	o__Staphylococcales	f__Salinicoccaceae	g__Jeotgalicoccus	s__Jeotgalicoccus nanhaiensis
HJX5.bin.20	YES	p__Bacteroidota	c__Bacteroidia	o__Bacteroidales	f__P3	g__Pullibacteroides	s__
S1.bin.25	YES	p__Bacteroidota	c__Bacteroidia	o__Bacteroidales	f__Muribaculaceae	g__CAG-873	s__CAG-873 sp001689415
SAMEA6809535.bin.5	YES	p__Bacteroidota	c__Bacteroidia	o__Bacteroidales	f__Bacteroidaceae	g__RGIG8745	s__RGIG8745 sp017621515
RNX10.bin.10	YES	p__Fusobacteriota	c__Fusobacteriia	o__Fusobacteriales	f__Fusobacteriaceae	g__Fusobacterium_B	s__Fusobacterium_B sp019416865
FDSW210084435_8.bin.35	YES	p__Bacillota_A	c__Clostridia	o__Peptostreptococcales	f__Anaerovoracaceae	g__Fimisoma	s__
HJ4.bin.9	YES	p__Actinomycetota	c__Coriobacteriia	o__Coriobacteriales	f__Eggerthellaceae	g__MGBC163016	s__
HJ3.bin.41	YES	p__Bacteroidota	c__Bacteroidia	o__Bacteroidales	f__Muribaculaceae	g__Duncaniella	s__
RN19.bin.22	YES	p__Bacteroidota	c__Bacteroidia	o__Bacteroidales	f__Muribaculaceae	g__CAG-485	s__
MF13.bin.107	YES	p__Bacteroidota	c__Bacteroidia	o__Bacteroidales	f__P3	g__Pullibacteroides	s__
SRR21474240.bin.16	YES	p__Bacillota_A	c__Clostridia	o__Oscillospirales	f__Ruminococcaceae	g__Ruminiclostridium_E	s__
SRR23368201.bin.37	YES	p__Bacillota_A	c__Clostridia	o__Oscillospirales	f__Acutalibacteraceae	g__Fimenecus	s__
SRR23368219.bin.17	YES	p__Bacillota_A	c__Clostridia	o__Lachnospirales	f__Lachnospiraceae	g__CAG-590	s__
SRR13490896.bin.36	YES	p__Bacteroidota	c__Bacteroidia	o__Bacteroidales	f__Muribaculaceae	g__CAG-485	s__
SRR23368204.bin.58	YES	p__Bacillota_A	c__Clostridia	o__Oscillospirales	f__Oscillospiraceae	g__Dysosmobacter	s__
HXJS4.bin.16	YES	p__Bacteroidota	c__Bacteroidia	o__Bacteroidales	f__Muribaculaceae	g__Duncaniella	s__
SRR13490891.bin.73	YES	p__Bacteroidota	c__Bacteroidia	o__Bacteroidales	f__Muribaculaceae	g__CAG-873	s__
RF13.bin.88	YES	p__Pseudomonadota	c__Gammaproteobacteria	o__Enterobacterales	f__Enterobacteriaceae	g__Serratia_B	s__Serratia_B rubidaea
SRR23368214.bin.4	YES	p__Bacillota_A	c__Clostridia	o__Lachnospirales	f__Lachnospiraceae	g__Eubacterium_F	s__
SRR14411272.bin.12	YES	p__Bacillota	c__Bacilli	o__Acholeplasmatales	f__Anaeroplasmataceae	g__Pelethenecus	s__
SRR23368212.bin.88	YES	p__Bacteroidota	c__Bacteroidia	o__Bacteroidales	f__Marinifilaceae	g__Odoribacter	s__
S7.bin.5	YES	p__Bacteroidota	c__Bacteroidia	o__Bacteroidales	f__Muribaculaceae	g__Muribaculum	s__Muribaculum sp910578835
HJX7.bin.39	YES	p__Actinomycetota	c__Actinomycetia	o__Actinomycetales	f__Microbacteriaceae	g__Leucobacter	s__
RNX8.bin.83	YES	p__Bacillota_A	c__Clostridia	o__Lachnospirales	f__Lachnospiraceae	g__Butyribacter	s__
SRR14411247.bin.36	YES	p__Bacteroidota	c__Bacteroidia	o__Bacteroidales	f__P3	g__Pullibacteroides	s__
HXJS1.bin.4	YES	p__Bacillota_A	c__Clostridia	o__Lachnospirales	f__Lachnospiraceae	g__14-2	s__
RN9.bin.69	YES	p__Desulfobacterota	c__Desulfovibrionia	o__Desulfovibrionales	f__Desulfovibrionaceae	g__Mailhella	s__
MF18.bin.13	YES	p__Bacteroidota	c__Bacteroidia	o__Bacteroidales	f__Muribaculaceae	g__CAJUPY01	s__
RF20.bin.43	YES	p__Bacillota_C	c__Negativicutes	o__Acidaminococcales	f__Acidaminococcaceae	g__Phascolarctobacterium_A	s__Phascolarctobacterium_A succinatutens
SRR11425456.bin.26	YES	p__Bacillota_A	c__Clostridia	o__Oscillospirales	f__Ruminococcaceae	g__RGIG8773	s__RGIG8773 sp014799785
RN10.bin.21	YES	p__Bacillota	c__Bacilli	o__Lactobacillales	f__Lactobacillaceae	g__Limosilactobacillus	s__Limosilactobacillus reuteri
SRR13890126.bin.29	YES	p__Actinomycetota	c__Coriobacteriia	o__Coriobacteriales	f__Eggerthellaceae	g__Adlercreutzia	s__
M2.bin.83	YES	p__Bacillota_A	c__Clostridia	o__Peptostreptococcales	f__Anaerovoracaceae	g__Lentihominibacter	s__
SRR13490891.bin.3	YES	p__Verrucomicrobiota	c__Verrucomicrobiae	o__Verrucomicrobiales	f__Akkermansiaceae	g__Akkermansia	s__
HJ16.bin.100	YES	p__Bacteroidota	c__Bacteroidia	o__Bacteroidales	f__Muribaculaceae	g__CAG-873	s__
HJ17.bin.115	YES	p__Bacteroidota	c__Bacteroidia	o__Bacteroidales	f__Muribaculaceae	g__Paramuribaculum	s__
HJ10.bin.167	YES	p__Bacteroidota	c__Bacteroidia	o__Bacteroidales	f__Bacteroidaceae	g__Bacteroides	s__Bacteroides sp905215555
RF1.bin.77	YES	p__Bacillota_A	c__Clostridia	o__Peptostreptococcales	f__Anaerovoracaceae	g__Lentihominibacter	s__
SRR6032588.bin.12	YES	p__Bacillota_A	c__Clostridia	o__Lachnospirales	f__Lachnospiraceae	g__Caccovicinus	s__Caccovicinus sp009774615
SRR23368216.bin.63	YES	p__Bacillota_A	c__Clostridia	o__Oscillospirales	f__Acutalibacteraceae	g__Eubacterium_R	s__
SRR14411270.bin.18	YES	p__Bacteroidota	c__Bacteroidia	o__Bacteroidales	f__Muribaculaceae	g__Muribaculum	s__Muribaculum sp001701195
M17.bin.94	YES	p__Bacteroidota	c__Bacteroidia	o__Bacteroidales	f__Muribaculaceae	g__CAG-485	s__CAG-485 sp002491165
SRR23368205.bin.22	YES	p__Bacillota_A	c__Clostridia	o__Lachnospirales	f__Lachnospiraceae	g__MGBC143606	s__
FDSW210084421_12MC.bin.85	YES	p__Bacteroidota	c__Bacteroidia	o__Bacteroidales	f__Muribaculaceae	g__UBA7173	s__
H357	YES	p__Bacillota	c__Bacilli	o__Lactobacillales	f__Aerococcaceae	g__Aerococcus	s__Aerococcus urinaeequi
M4.bin.68	YES	p__Bacillota_A	c__Clostridia	o__Oscillospirales	f__Acutalibacteraceae	g__Eubacterium_R	s__Eubacterium_R sp910577195
M17.bin.60	YES	p__Bacteroidota	c__Bacteroidia	o__Bacteroidales	f__Muribaculaceae	g__CAG-485	s__
BSTS13.bin.39	YES	p__Desulfobacterota	c__Desulfovibrionia	o__Desulfovibrionales	f__Desulfovibrionaceae	g__Desulfovibrio	s__
RF9.bin.16	YES	p__Bacillota_A	c__Clostridia	o__Oscillospirales	f__Acutalibacteraceae	g__Eubacterium_R	s__Eubacterium_R sp910577195
SRR11852056.bin.1	YES	p__Bacillota_A	c__Clostridia	o__Lachnospirales	f__Lachnospiraceae	g__Pseudobutyrivibrio	s__
DF17.bin.67	YES	p__Bacillota_A	c__Clostridia	o__Lachnospirales	f__Lachnospiraceae	g__	s__
RF6.bin.7	YES	p__Bacillota	c__Bacilli	o__Lactobacillales	f__Lactobacillaceae	g__Limosilactobacillus	s__Limosilactobacillus reuteri
SRR21474241.bin.74	YES	p__Bacillota_A	c__Clostridia	o__Lachnospirales	f__Lachnospiraceae	g__	s__
S5.bin.65	YES	p__Bacteroidota	c__Bacteroidia	o__Bacteroidales	f__Muribaculaceae	g__Duncaniella	s__
SRR11425451.bin.44	YES	p__Bacteroidota	c__Bacteroidia	o__Bacteroidales	f__Muribaculaceae	g__CAG-873	s__CAG-873 sp014800735
RF18.bin.108	YES	p__Bacillota_A	c__Clostridia	o__Lachnospirales	f__Lachnospiraceae	g__Schaedlerella	s__
RNX1.bin.70	YES	p__Desulfobacterota	c__Desulfovibrionia	o__Desulfovibrionales	f__Desulfovibrionaceae	g__Desulfovibrio	s__
SRR14411338.bin.13	YES	p__Campylobacterota	c__Campylobacteria	o__Campylobacterales	f__Helicobacteraceae	g__NHYM01	s__
FDSW210084435_8.bin.28	YES	p__Bacillota_A	c__Clostridia	o__Oscillospirales	f__Acutalibacteraceae	g__Eubacterium_R	s__
BSTS15.bin.74	YES	p__Bacillota_A	c__Clostridia	o__Lachnospirales	f__Lachnospiraceae	g__Eubacterium_F	s__
BSTS2.bin.36	YES	p__Bacteroidota	c__Bacteroidia	o__Bacteroidales	f__Muribaculaceae	g__CAG-873	s__
SRR13490892.bin.43	YES	p__Bacteroidota	c__Bacteroidia	o__Bacteroidales	f__Rikenellaceae	g__Alistipes	s__
SRR23368202.bin.61	YES	p__Bacillota_A	c__Clostridia	o__Christensenellales	f__Borkfalkiaceae	g__Gallimonas	s__
HJ18.bin.36	YES	p__Bacteroidota	c__Bacteroidia	o__Bacteroidales	f__Muribaculaceae	g__CAG-485	s__
RNX1.bin.166	YES	p__Bacteroidota	c__Bacteroidia	o__Bacteroidales	f__Muribaculaceae	g__CAG-485	s__
SRR14411246.bin.15	YES	p__Bacteroidota	c__Bacteroidia	o__Bacteroidales	f__Muribaculaceae	g__CAG-485	s__
DF18.bin.99	YES	p__Bacteroidota	c__Bacteroidia	o__Bacteroidales	f__P3	g__Pullibacteroides	s__
BV28.bin.93	YES	p__Desulfobacterota	c__Desulfovibrionia	o__Desulfovibrionales	f__Desulfovibrionaceae	g__Desulfovibrio	s__
HJ1.bin.41	YES	p__Bacillota_A	c__Clostridia	o__Lachnospirales	f__Lachnospiraceae	g__Butyribacter	s__
G1.bin.12	YES	p__Bacteroidota	c__Bacteroidia	o__Bacteroidales	f__Muribaculaceae	g__Muribaculum	s__
SRR21474235.bin.56	YES	p__Bacillota_A	c__Clostridia	o__Christensenellales	f__Borkfalkiaceae	g__Gallimonas	s__
BV3.bin.12	YES	p__Bacillota_A	c__Clostridia	o__Lachnospirales	f__Lachnospiraceae	g__	s__
BSTS1.bin.158	YES	p__Bacillota_A	c__Clostridia	o__Oscillospirales	f__Ruminococcaceae	g__Firm-04	s__
SRR13490888.bin.32	YES	p__Pseudomonadota	c__Gammaproteobacteria	o__Burkholderiales	f__Burkholderiaceae_A	g__JAFTYR01	s__
RNX5.bin.13	YES	p__Bacillota_C	c__Negativicutes	o__Acidaminococcales	f__Acidaminococcaceae	g__Phascolarctobacterium_A	s__Phascolarctobacterium_A sp905200645
BV6.H.bin.44	YES	p__Bacillota_A	c__Clostridia	o__Lachnospirales	f__Lachnospiraceae	g__1XD42-69	s__
CD1.bin.9	YES	p__Verrucomicrobiota	c__Verrucomicrobiae	o__Verrucomicrobiales	f__Akkermansiaceae	g__Akkermansia	s__
MF85	YES	p__Bacillota	c__Bacilli	o__Paenibacillales	f__Paenibacillaceae	g__Paenibacillus	s__
RN3.bin.135	YES	p__Pseudomonadota	c__Gammaproteobacteria	o__Enterobacterales_A	f__Pasteurellaceae	g__Rodentibacter	s__Rodentibacter rarus
SRR23368211.bin.38	YES	p__Bacteroidota	c__Bacteroidia	o__Bacteroidales	f__Muribaculaceae	g__CAG-485	s__
M15.bin.70	YES	p__Bacillota_A	c__Clostridia	o__Lachnospirales	f__Lachnospiraceae	g__CAG-632	s__CAG-632 sp910587045
SRR23368208.bin.40	YES	p__Bacillota_A	c__Clostridia	o__Oscillospirales	f__Ruminococcaceae	g__UMGS1601	s__
SAMEA6809535.bin.19	YES	p__Spirochaetota	c__Spirochaetia	o__Treponematales	f__Treponemataceae	g__Treponema_D	s__
RN6.bin.64	YES	p__Bacillota_A	c__Clostridia	o__Lachnospirales	f__Lachnospiraceae	g__Schaedlerella	s__
RN17.bin.101	YES	p__Bacillota_A	c__Clostridia	o__Lachnospirales	f__Lachnospiraceae	g__Wujia	s__
HJ12.bin.163	YES	p__Bacteroidota	c__Bacteroidia	o__Bacteroidales	f__Bacteroidaceae	g__	s__
SRR13490889.bin.22	YES	p__Pseudomonadota	c__Gammaproteobacteria	o__Burkholderiales	f__Burkholderiaceae_A	g__JAFTYR01	s__
S5.bin.72	YES	p__Bacteroidota	c__Bacteroidia	o__Bacteroidales	f__Muribaculaceae	g__CAG-485	s__
ERR3357639.bin.80	YES	p__Bacillota_A	c__Clostridia	o__Lachnospirales	f__Lachnospiraceae	g__UBA3282	s__UBA3282 sp009774575
SRR23368206.bin.46	YES	p__Bacteroidota	c__Bacteroidia	o__Bacteroidales	f__Muribaculaceae	g__CAG-485	s__
MF6.bin.77	YES	p__Desulfobacterota	c__Desulfovibrionia	o__Desulfovibrionales	f__Desulfovibrionaceae	g__Desulfovibrio	s__
HJ8.bin.206	YES	p__Bacteroidota	c__Bacteroidia	o__Bacteroidales	f__Rikenellaceae	g__Alistipes	s__
MF13.bin.95	YES	p__Bacillota_A	c__Clostridia	o__Oscillospirales	f__Acutalibacteraceae	g__Fimenecus	s__
MF4.bin.100	YES	p__Spirochaetota	c__GWE2-31-10	o__GWE2-31-10	f__GWE2-31-10	g__RGIG8597	s__
SRR11425456.bin.9	YES	p__Bacteroidota	c__Bacteroidia	o__Bacteroidales	f__Muribaculaceae	g__CAG-485	s__CAG-485 sp014800535
SRR11425450.bin.10	YES	p__Bacteroidota	c__Bacteroidia	o__Bacteroidales	f__Muribaculaceae	g__Duncaniella	s__
BSTS1.bin.180	YES	p__Bacteroidota	c__Bacteroidia	o__Bacteroidales	f__Muribaculaceae	g__Paramuribaculum	s__
HJX1.bin.23	YES	p__Bacteroidota	c__Bacteroidia	o__Bacteroidales	f__Muribaculaceae	g__UBA7173	s__
SRR11425466.bin.41	YES	p__Bacteroidota	c__Bacteroidia	o__Bacteroidales	f__Muribaculaceae	g__CAJUPY01	s__CAJUPY01 sp014800385
HJ12.bin.90	YES	p__Bacteroidota	c__Bacteroidia	o__Bacteroidales	f__Rikenellaceae	g__Alistipes	s__
SRR9205169.bin.15	YES	p__Bacillota_A	c__Clostridia	o__Lachnospirales	f__Lachnospiraceae	g__MGBC164599	s__MGBC164599 sp910575625
SRR21350780.bin.1	YES	p__Bacteroidota	c__Bacteroidia	o__Bacteroidales	f__Muribaculaceae	g__Amulumruptor	s__
HJ7.bin.195	YES	p__Bacillota_A	c__Clostridia	o__Lachnospirales	f__Lachnospiraceae	g__Caccovicinus	s__
HJX1.bin.95	YES	p__Bacteroidota	c__Bacteroidia	o__Bacteroidales	f__Bacteroidaceae	g__Bacteroides	s__Bacteroides uniformis
SRR23368217.bin.62	YES	p__Bacteroidota	c__Bacteroidia	o__Bacteroidales	f__Rikenellaceae	g__Alistipes	s__
HJX3.bin.66	YES	p__Bacillota	c__Bacilli	o__Erysipelotrichales	f__Erysipelotrichaceae	g__Dubosiella	s__
M17.bin.45	YES	p__Bacteroidota	c__Bacteroidia	o__Bacteroidales	f__Muribaculaceae	g__CAG-873	s__
ERR3357642.bin.58	YES	p__Bacillota_A	c__Clostridia	o__Lachnospirales	f__Lachnospiraceae	g__Ventrimonas	s__Ventrimonas sp003611875
H1102	YES	p__Bacillota	c__Bacilli	o__Staphylococcales	f__Staphylococcaceae	g__Staphylococcus	s__Staphylococcus capitis
DF16.bin.44	YES	p__Bacillota_A	c__Clostridia	o__Oscillospirales	f__Ruminococcaceae	g__CAG-115	s__
SRR23368209.bin.87	YES	p__Bacillota_A	c__Clostridia	o__Lachnospirales	f__Lachnospiraceae	g__	s__
DF9.bin.44	YES	p__Desulfobacterota	c__Desulfovibrionia	o__Desulfovibrionales	f__Desulfovibrionaceae	g__Desulfovibrio	s__
M17.bin.86	YES	p__Actinomycetota	c__Actinomycetia	o__Actinomycetales	f__Bifidobacteriaceae	g__Bifidobacterium	s__Bifidobacterium globosum
M3.bin.124	YES	p__Bacillota	c__Bacilli	o__Erysipelotrichales	f__Erysipelotrichaceae	g__Dubosiella	s__Dubosiella sp910585105
MF7.bin.143	YES	p__Bacteroidota	c__Bacteroidia	o__Bacteroidales	f__Bacteroidaceae	g__Prevotella	s__
M13.bin.61	YES	p__Elusimicrobiota	c__Elusimicrobia	o__Elusimicrobiales	f__Elusimicrobiaceae	g__UBA1436	s__
DF12.bin.13	YES	p__Campylobacterota	c__Campylobacteria	o__Campylobacterales	f__Helicobacteraceae	g__Helicobacter_C	s__
RN1.bin.109	YES	p__Campylobacterota	c__Campylobacteria	o__Campylobacterales	f__Helicobacteraceae	g__Helicobacter_D	s__Helicobacter_D rodentium
HJ19.bin.55	YES	p__Bacillota_A	c__Clostridia	o__Peptostreptococcales	f__Anaerovoracaceae	g__JAAVYD01	s__
BSTS15.bin.36	YES	p__Desulfobacterota	c__Desulfovibrionia	o__Desulfovibrionales	f__Desulfovibrionaceae	g__Desulfovibrio	s__
M19.bin.11	YES	p__Actinomycetota	c__Coriobacteriia	o__Coriobacteriales	f__Eggerthellaceae	g__Anaerotardibacter	s__Anaerotardibacter sp000435675
BSTS12.bin.145	YES	p__Bacteroidota	c__Bacteroidia	o__Bacteroidales	f__Muribaculaceae	g__CAG-485	s__
ERR3357638.bin.80	YES	p__Campylobacterota	c__Campylobacteria	o__Campylobacterales	f__Helicobacteraceae	g__Helicobacter_C	s__Helicobacter_C hepaticus
RF9.bin.107	YES	p__Bacillota_B	c__Peptococcia	o__Peptococcales	f__Peptococcaceae	g__UBA7185	s__UBA7185 sp002491065
SRR11425459.bin.18	YES	p__Bacteroidota	c__Bacteroidia	o__Bacteroidales	f__Muribaculaceae	g__CAG-485	s__CAG-485 sp014800785
M15.bin.72	YES	p__Bacteroidota	c__Bacteroidia	o__Bacteroidales	f__Muribaculaceae	g__CAG-485	s__
SRR23368217.bin.88	YES	p__Bacillota_A	c__Clostridia	o__Oscillospirales	f__Acutalibacteraceae	g__Fimenecus	s__
HJ19.bin.122	YES	p__Bacillota_A	c__Clostridia	o__Peptostreptococcales	f__Anaerovoracaceae	g__Lentihominibacter	s__
FDSW210084436_9.bin.89	YES	p__Bacteroidota	c__Bacteroidia	o__Bacteroidales	f__Barnesiellaceae	g__Barnesiella_A	s__
DF7.bin.126	YES	p__Bacteroidota	c__Bacteroidia	o__Bacteroidales	f__P3	g__Pullibacteroides	s__
M5.bin.64	YES	p__Desulfobacterota	c__Desulfovibrionia	o__Desulfovibrionales	f__Desulfovibrionaceae	g__Mailhella	s__
S9.bin.40	YES	p__Bacillota_A	c__Clostridia	o__Lachnospirales	f__Lachnospiraceae	g__UBA3282	s__UBA3282 sp910579395
RF14.bin.62	YES	p__Bacteroidota	c__Bacteroidia	o__Bacteroidales	f__Muribaculaceae	g__Paramuribaculum	s__
DY71	YES	p__Pseudomonadota	c__Gammaproteobacteria	o__Enterobacterales	f__Enterobacteriaceae	g__Klebsiella	s__Klebsiella aerogenes
SRR13490894.bin.117	YES	p__Bacteroidota	c__Bacteroidia	o__Bacteroidales	f__Tannerellaceae	g__Parabacteroides	s__Parabacteroides sp003480915
SRR23368208.bin.7	YES	p__Bacillota_A	c__Clostridia	o__Oscillospirales	f__Acutalibacteraceae	g__Ruminococcus_E	s__
SRR14411339.bin.28	YES	p__Bacillota_A	c__Clostridia	o__Oscillospirales	f__Oscillospiraceae	g__Dysosmobacter	s__Dysosmobacter sp910577405
BV21.bin.110	YES	p__Bacteroidota	c__Bacteroidia	o__Bacteroidales	f__Muribaculaceae	g__JAGBWK01	s__
SRR11425453.bin.54	YES	p__Bacteroidota	c__Bacteroidia	o__Bacteroidales	f__Muribaculaceae	g__Paramuribaculum	s__Paramuribaculum sp014801865
BVI9.bin.47	YES	p__Bacteroidota	c__Bacteroidia	o__Bacteroidales	f__Muribaculaceae	g__CAG-485	s__
RNX3.bin.27	YES	p__Cyanobacteriota	c__Vampirovibrionia	o__Gastranaerophilales	f__Gastranaerophilaceae	g__Limenecus	s__
M1.bin.103	YES	p__Bacteroidota	c__Bacteroidia	o__Bacteroidales	f__P3	g__Pullibacteroides	s__
HJ15.bin.104	YES	p__Bacillota	c__Bacilli	o__Lactobacillales	f__Streptococcaceae	g__Streptococcus	s__
H255	YES	p__Bacillota	c__Bacilli	o__Lactobacillales	f__Streptococcaceae	g__Lactococcus	s__Lactococcus lactis
SRR23368201.bin.39	YES	p__Bacillota_A	c__Clostridia	o__UMGS1883	f__UMGS1883	g__JAJQCX01	s__
HJ9.bin.138	YES	p__Bacillota_A	c__Clostridia	o__Lachnospirales	f__Lachnospiraceae	g__14-2	s__
DF7.bin.17	YES	p__Bacillota_A	c__Clostridia	o__Oscillospirales	f__Ruminococcaceae	g__Ruminiclostridium_E	s__
DF4.bin.33	YES	p__Bacteroidota	c__Bacteroidia	o__Bacteroidales	f__Bacteroidaceae	g__Prevotella	s__
SRR23368207.bin.85	YES	p__Bacillota_A	c__Clostridia	o__Lachnospirales	f__Lachnospiraceae	g__Butyribacter	s__
M17.bin.111	YES	p__Bacteroidota	c__Bacteroidia	o__Bacteroidales	f__Bacteroidaceae	g__Prevotella	s__
SRR23368215.bin.77	YES	p__Bacillota_A	c__Clostridia	o__Oscillospirales	f__Acutalibacteraceae	g__	s__
BSTS5.bin.117	YES	p__Desulfobacterota	c__Desulfovibrionia	o__Desulfovibrionales	f__Desulfovibrionaceae	g__Bilophila	s__
SRR11425443.bin.64	YES	p__Bacteroidota	c__Bacteroidia	o__Bacteroidales	f__Muribaculaceae	g__CAG-485	s__CAG-485 sp014800785
SRR21350775.bin.9	YES	p__Bacteroidota	c__Bacteroidia	o__Bacteroidales	f__Muribaculaceae	g__UBA3263	s__
HJ14.bin.183	YES	p__Bacillota	c__Bacilli	o__Erysipelotrichales	f__Coprobacillaceae	g__Fimiplasma	s__
SRR6032587.bin.3	YES	p__Campylobacterota	c__Campylobacteria	o__Campylobacterales	f__Helicobacteraceae	g__Helicobacter_C	s__Helicobacter_C typhlonius
SRR23368219.bin.42	YES	p__Bacteroidota	c__Bacteroidia	o__Bacteroidales	f__Bacteroidaceae	g__Bacteroides	s__
RNX4.bin.56	YES	p__Bacteroidota	c__Bacteroidia	o__Bacteroidales	f__Muribaculaceae	g__UBA7173	s__
FDSW210084436_9.bin.46	YES	p__Bacillota_A	c__Clostridia	o__Oscillospirales	f__Ruminococcaceae	g__CAG-115	s__
SRR14411261.bin.11	YES	p__Bacteroidota	c__Bacteroidia	o__Bacteroidales	f__P3	g__Pullibacteroides	s__
MFY43	YES	p__Pseudomonadota	c__Gammaproteobacteria	o__Enterobacterales	f__Enterobacteriaceae	g__Enterobacter	s__Enterobacter hormaechei_A
MF6	YES	p__Pseudomonadota	c__Gammaproteobacteria	o__Enterobacterales	f__Enterobacteriaceae	g__Enterobacter	s__Enterobacter cloacae_M
BV21.bin.145	YES	p__Bacteroidota	c__Bacteroidia	o__Bacteroidales	f__Muribaculaceae	g__CAG-485	s__
SRR13490894.bin.43	YES	p__Bacteroidota	c__Bacteroidia	o__Bacteroidales	f__Rikenellaceae	g__Tidjanibacter	s__
MF11.bin.46	YES	p__Bacillota_A	c__Clostridia	o__Christensenellales	f__Pumilibacteraceae	g__Anaerocaecibacter	s__
BV24.bin.120	YES	p__Pseudomonadota	c__Gammaproteobacteria	o__Burkholderiales	f__Burkholderiaceae	g__Oxalobacter	s__
HXJS2.bin.42	YES	p__Bacteroidota	c__Bacteroidia	o__Bacteroidales	f__Muribaculaceae	g__CAG-485	s__
SRR23368217.bin.22	YES	p__Bacteroidota	c__Bacteroidia	o__Bacteroidales	f__Rikenellaceae	g__Tidjanibacter	s__
RNX3.bin.125	YES	p__Bacteroidota	c__Bacteroidia	o__Bacteroidales	f__Marinifilaceae	g__Odoribacter	s__Odoribacter sp905215395
SRR13890097.bin.3	YES	p__Spirochaetota	c__Spirochaetia	o__Treponematales	f__Treponemataceae	g__Treponema_D	s__
H24_2	YES	p__Bacillota	c__Bacilli	o__Bacillales	f__DSM-1321	g__Peribacillus	s__Peribacillus frigoritolerans
SRR14411332.bin.7	YES	p__Bacillota_A	c__Clostridia	o__Christensenellales	f__Borkfalkiaceae	g__Coproplasma	s__
SRR10605906.bin.115	YES	p__Bacillota_A	c__Clostridia	o__Oscillospirales	f__Ruminococcaceae	g__UBA1394	s__
HXJS4.bin.8	YES	p__Bacteroidota	c__Bacteroidia	o__Bacteroidales	f__Muribaculaceae	g__CAG-873	s__
SRR14411320.bin.2	YES	p__Campylobacterota	c__Campylobacteria	o__Campylobacterales	f__Helicobacteraceae	g__NHYN01	s__
RF11.bin.50	YES	p__Bacillota_A	c__Clostridia	o__Lachnospirales	f__Lachnospiraceae	g__Roseburia	s__
H498	YES	p__Pseudomonadota	c__Gammaproteobacteria	o__Enterobacterales	f__Enterobacteriaceae	g__Providencia	s__Providencia vermicola
RNX4.bin.78	YES	p__Fusobacteriota	c__Fusobacteriia	o__Fusobacteriales	f__Fusobacteriaceae	g__Fusobacterium_B	s__
M1.bin.62	YES	p__Bacteroidota	c__Bacteroidia	o__Bacteroidales	f__UBA932	g__Cryptobacteroides	s__
SRR14411287.bin.4	YES	p__Bacteroidota	c__Bacteroidia	o__Bacteroidales	f__Muribaculaceae	g__UBA3263	s__UBA3263 sp002490725
SRR23368208.bin.25	YES	p__Verrucomicrobiota	c__Verrucomicrobiae	o__Verrucomicrobiales	f__Akkermansiaceae	g__Akkermansia	s__
SRR10605906.bin.13	YES	p__Bacillota_A	c__Clostridia	o__Lachnospirales	f__Lachnospiraceae	g__CAG-632	s__
SRR11425431.bin.34	YES	p__Bacteroidota	c__Bacteroidia	o__Bacteroidales	f__Muribaculaceae	g__Duncaniella	s__Duncaniella sp014802325
MF2.bin.80	YES	p__Bacteroidota	c__Bacteroidia	o__Bacteroidales	f__Muribaculaceae	g__Paramuribaculum	s__
SRR13490894.bin.20	YES	p__Bacteroidota	c__Bacteroidia	o__Bacteroidales	f__Paludibacteraceae	g__RF16	s__
SRR13890126.bin.31	YES	p__Desulfobacterota	c__Desulfovibrionia	o__Desulfovibrionales	f__Desulfovibrionaceae	g__Desulfovibrio	s__
RF20.bin.40	YES	p__Bacillota_A	c__Clostridia	o__Lachnospirales	f__Lachnospiraceae	g__Ruminococcus_B	s__Ruminococcus_B gnavus
FDSW210084433_6.bin.23	YES	p__Bacillota_A	c__Clostridia	o__Oscillospirales	f__Acutalibacteraceae	g__Fimenecus	s__
ERR3357643.bin.19	YES	p__Bacillota_A	c__Clostridia	o__Lachnospirales	f__Lachnospiraceae	g__Ventrimonas	s__
HJ17.bin.125	YES	p__Bacillota_A	c__Clostridia	o__Peptostreptococcales	f__Anaerovoracaceae	g__Zhenpiania	s__
SRR23368208.bin.8	YES	p__Bacillota_A	c__Clostridia	o__Oscillospirales	f__Acutalibacteraceae	g__Fimenecus	s__
HJ7.bin.13	YES	p__Bacteroidota	c__Bacteroidia	o__Bacteroidales	f__Rikenellaceae	g__Alistipes	s__
SRR14411328.bin.29	YES	p__Campylobacterota	c__Campylobacteria	o__Campylobacterales	f__Helicobacteraceae	g__NHYN01	s__
G1.bin.81	YES	p__Desulfobacterota	c__Desulfovibrionia	o__Desulfovibrionales	f__Desulfovibrionaceae	g__Desulfovibrio	s__
DF10.bin.83	YES	p__Bacillota_A	c__Clostridia	o__Lachnospirales	f__Lachnospiraceae	g__Wujia	s__
RNX3.bin.71	YES	p__Bacillota_A	c__Clostridia	o__Oscillospirales	f__Acutalibacteraceae	g__Eubacterium_R	s__Eubacterium_R sp910577195
SRR14411304.bin.2	YES	p__Bacteroidota	c__Bacteroidia	o__Bacteroidales	f__Rikenellaceae	g__Alistipes	s__
RN12.bin.142	YES	p__Bacillota_A	c__Clostridia	o__Oscillospirales	f__Acutalibacteraceae	g__Eubacterium_R	s__
RN19.bin.87	YES	p__Bacillota_A	c__Clostridia	o__Peptostreptococcales	f__Anaerovoracaceae	g__Emergencia	s__
HJ14.bin.53	YES	p__Bacillota_A	c__Clostridia	o__Peptostreptococcales	f__Anaerovoracaceae	g__JAAVYD01	s__
HJ19.bin.146	YES	p__Bacteroidota	c__Bacteroidia	o__Bacteroidales	f__Paludibacteraceae	g__RF16	s__
FDSW210084434_7.bin.103	YES	p__Bacillota_A	c__Clostridia	o__Oscillospirales	f__Ruminococcaceae	g__CAG-115	s__
M19.bin.24	YES	p__Desulfobacterota	c__Desulfovibrionia	o__Desulfovibrionales	f__Desulfovibrionaceae	g__Desulfovibrio	s__
SRR13490891.bin.85	YES	p__Bacillota_A	c__Clostridia	o__Lachnospirales	f__Lachnospiraceae	g__Wujia	s__
RNX7.bin.59	YES	p__Bacteroidota	c__Bacteroidia	o__Bacteroidales	f__Muribaculaceae	g__CAG-485	s__
SRR14411304.bin.3	YES	p__Bacteroidota	c__Bacteroidia	o__Bacteroidales	f__Muribaculaceae	g__Muribaculum	s__Muribaculum sp910578785
HXJS1.bin.29	YES	p__Bacteroidota	c__Bacteroidia	o__Bacteroidales	f__Muribaculaceae	g__Duncaniella	s__
RF18.bin.223	YES	p__Desulfobacterota	c__Desulfovibrionia	o__Desulfovibrionales	f__Desulfovibrionaceae	g__Mailhella	s__Mailhella sp910577155
M1.bin.91	YES	p__Bacteroidota	c__Bacteroidia	o__Bacteroidales	f__Muribaculaceae	g__UBA7173	s__
SRR13490892.bin.81	YES	p__Bacteroidota	c__Bacteroidia	o__Bacteroidales	f__Muribaculaceae	g__UBA3263	s__
HJX5.bin.111	YES	p__Pseudomonadota	c__Gammaproteobacteria	o__Enterobacterales	f__Enterobacteriaceae	g__Escherichia	s__Escherichia coli
DF7.bin.56	YES	p__Bacteroidota	c__Bacteroidia	o__Bacteroidales	f__Muribaculaceae	g__CAG-873	s__
ERR3357618.bin.22	YES	p__Bacillota_A	c__Clostridia	o__Lachnospirales	f__Lachnospiraceae	g__COE1	s__COE1 sp910579275
SRR13490893.bin.118	YES	p__Bacillota_A	c__Clostridia	o__Lachnospirales	f__Lachnospiraceae	g__Eubacterium_F	s__
H359	YES	p__Bacillota_A	c__Clostridia	o__Peptostreptococcales	f__Peptostreptococcaceae	g__Paraclostridium	s__Paraclostridium dentum
MF14.bin.101	YES	p__Bacillota_A	c__Clostridia	o__Oscillospirales	f__Ruminococcaceae	g__CAG-115	s__
HJX8.bin.14	YES	p__Bacillota	c__Bacilli	o__Bacillales	f__Planococcaceae	g__Kurthia	s__Kurthia gibsonii
RNX8.bin.109	YES	p__Bacillota_A	c__Clostridia	o__Christensenellales	f__Borkfalkiaceae	g__Coproplasma	s__
RF13.bin.90	YES	p__Bacteroidota	c__Bacteroidia	o__Bacteroidales	f__Bacteroidaceae	g__Phocaeicola	s__Phocaeicola faecalis
SRR13490893.bin.145	YES	p__Bacteroidota	c__Bacteroidia	o__Bacteroidales	f__Rikenellaceae	g__Alistipes	s__
SRR9205167.bin.8	YES	p__Bacteroidota	c__Bacteroidia	o__Bacteroidales	f__Rikenellaceae	g__Alistipes	s__Alistipes sp009774895
MF8.bin.11	YES	p__Bacteroidota	c__Bacteroidia	o__Bacteroidales	f__Bacteroidaceae	g__Prevotella	s__
HXJS2.bin.29	YES	p__Bacteroidota	c__Bacteroidia	o__Bacteroidales	f__Muribaculaceae	g__CAG-873	s__
HJ4.bin.80	YES	p__Campylobacterota	c__Campylobacteria	o__Campylobacterales	f__Helicobacteraceae	g__Helicobacter_C	s__Helicobacter_C japonicus
MF8.bin.117	YES	p__Deferribacterota	c__Deferribacteres	o__Deferribacterales	f__Mucispirillaceae	g__	s__
RF18.bin.1	YES	p__Bacillota_A	c__Clostridia	o__Oscillospirales	f__Oscillospiraceae	g__Pseudoscilispira	s__
FDSW210084431_4.bin.90	YES	p__Bacteroidota	c__Bacteroidia	o__Bacteroidales	f__Muribaculaceae	g__CAG-873	s__
HJX1.bin.25	YES	p__Bacteroidota	c__Bacteroidia	o__Bacteroidales	f__Muribaculaceae	g__CAG-485	s__
BV22.bin.119	YES	p__Bacillota_A	c__Clostridia	o__Oscillospirales	f__CAG-382	g__UBA1752	s__
SRR21350752.bin.1	YES	p__Bacteroidota	c__Bacteroidia	o__Bacteroidales	f__Muribaculaceae	g__CAG-485	s__
DF8.bin.2	YES	p__Spirochaetota	c__Spirochaetia	o__Treponematales	f__Treponemataceae	g__Treponema_D	s__
RNX4.bin.7	YES	p__Desulfobacterota	c__Desulfovibrionia	o__Desulfovibrionales	f__Desulfovibrionaceae	g__Desulfovibrio	s__
SRR21474242.bin.25	YES	p__Bacillota_A	c__Clostridia	o__Lachnospirales	f__Lachnospiraceae	g__Velocimicrobium	s__
RN18.bin.109	YES	p__Actinomycetota	c__Coriobacteriia	o__Coriobacteriales	f__Coriobacteriaceae	g__Collinsella	s__Collinsella sp900540845
SRR13490890.bin.22	YES	p__Cyanobacteriota	c__Vampirovibrionia	o__Gastranaerophilales	f__Gastranaerophilaceae	g__Avigastranaerophilus	s__
MF19.bin.34	YES	p__Bacillota_A	c__Clostridia	o__Lachnospirales	f__Lachnospiraceae	g__CAG-303	s__
SRR11425465.bin.29	YES	p__Bacteroidota	c__Bacteroidia	o__Bacteroidales	f__Muribaculaceae	g__UBA3263	s__UBA3263 sp014802435
SRR9205127.bin.93	YES	p__Bacillota_A	c__Clostridia	o__Lachnospirales	f__Lachnospiraceae	g__Caccovicinus	s__Caccovicinus sp009774615
SRR13490892.bin.45	YES	p__Bacillota_A	c__Clostridia	o__Lachnospirales	f__Lachnospiraceae	g__UBA2882	s__
FDSW210084421_12MC.bin.88	YES	p__Bacteroidota	c__Bacteroidia	o__Bacteroidales	f__Muribaculaceae	g__CAG-485	s__
S5.bin.18	YES	p__Bacteroidota	c__Bacteroidia	o__Bacteroidales	f__Muribaculaceae	g__CAG-485	s__
BV19.bin.6	YES	p__Bacteroidota	c__Bacteroidia	o__Bacteroidales	f__Muribaculaceae	g__UBA3263	s__
HJX8.bin.24	YES	p__Deferribacterota	c__Deferribacteres	o__Deferribacterales	f__Mucispirillaceae	g__Mucispirillum	s__
SRR21474233.bin.77	YES	p__Bacillota_A	c__Clostridia	o__Oscillospirales	f__Ruminococcaceae	g__CAG-115	s__
RN19.bin.9	YES	p__Bacillota_A	c__Clostridia	o__Oscillospirales	f__Ruminococcaceae	g__Negativibacillus	s__
S5.bin.64	YES	p__Bacteroidota	c__Bacteroidia	o__Bacteroidales	f__Muribaculaceae	g__Duncaniella	s__Duncaniella sp910578445
BV21.bin.48	YES	p__Bacillota_A	c__Clostridia	o__Lachnospirales	f__Lachnospiraceae	g__Eubacterium_F	s__
RNX7.bin.24	YES	p__Bacillota_A	c__Clostridia	o__Lachnospirales	f__Lachnospiraceae	g__UBA3282	s__
SRR13490889.bin.89	YES	p__Verrucomicrobiota	c__Verrucomicrobiae	o__Verrucomicrobiales	f__Akkermansiaceae	g__Akkermansia	s__
HJX1.bin.91	YES	p__Bacteroidota	c__Bacteroidia	o__Bacteroidales	f__Rikenellaceae	g__Alistipes	s__
ERR3357637.bin.37	YES	p__Bacillota_A	c__Clostridia	o__Lachnospirales	f__Lachnospiraceae	g__UBA3402	s__UBA3402 sp910577935
ERR3357633.bin.61	YES	p__Bacillota_A	c__Clostridia	o__Christensenellales	f__Borkfalkiaceae	g__Coproplasma	s__Coproplasma sp910577555
H1377	YES	p__Pseudomonadota	c__Gammaproteobacteria	o__Enterobacterales	f__Enterobacteriaceae	g__Proteus	s__Proteus mirabilis
RN17.bin.49	YES	p__Bacillota_A	c__Clostridia	o__Oscillospirales	f__Acutalibacteraceae	g__Eubacterium_R	s__Eubacterium_R sp910577195
SRR10605901.bin.1	YES	p__Bacteroidota	c__Bacteroidia	o__Bacteroidales	f__Muribaculaceae	g__CAG-873	s__
BV23.bin.82	YES	p__Desulfobacterota	c__Desulfovibrionia	o__Desulfovibrionales	f__Desulfovibrionaceae	g__Desulfovibrio	s__
SRR23368203.bin.3	YES	p__Bacteroidota	c__Bacteroidia	o__Bacteroidales	f__Muribaculaceae	g__JAJPXC01	s__
SRR11425464.bin.24	YES	p__Bacteroidota	c__Bacteroidia	o__Bacteroidales	f__Muribaculaceae	g__CAG-873	s__
ERR3357628.bin.38	YES	p__Bacteroidota	c__Bacteroidia	o__Bacteroidales	f__Bacteroidaceae	g__Bacteroides	s__Bacteroides acidifaciens
RNX1.bin.125	YES	p__Bacteroidota	c__Bacteroidia	o__Bacteroidales	f__Muribaculaceae	g__CAG-873	s__
SRR21350689.bin.10	YES	p__Bacteroidota	c__Bacteroidia	o__Bacteroidales	f__Muribaculaceae	g__Duncaniella	s__
SRR13490894.bin.27	YES	p__Bacteroidota	c__Bacteroidia	o__Bacteroidales	f__Marinifilaceae	g__Odoribacter	s__
BV25.bin.12	YES	p__Bacillota_A	c__Clostridia	o__Oscillospirales	f__Ruminococcaceae	g__Ruminiclostridium_E	s__
MFY41	YES	p__Pseudomonadota	c__Gammaproteobacteria	o__Enterobacterales	f__Enterobacteriaceae	g__Escherichia	s__Escherichia albertii
M12.bin.31	YES	p__Bacillota_A	c__Clostridia	o__Lachnospirales	f__Lachnospiraceae	g__Ruminococcus_B	s__Ruminococcus_B gnavus
SRR21350751.bin.7	YES	p__Bacteroidota	c__Bacteroidia	o__Bacteroidales	f__Muribaculaceae	g__CAG-485	s__
HJ13.bin.154	YES	p__Actinomycetota	c__Coriobacteriia	o__Coriobacteriales	f__Eggerthellaceae	g__Anaerotardibacter	s__
ERR3357622.bin.17	YES	p__Bacillota_A	c__Clostridia	o__Christensenellales	f__Borkfalkiaceae	g__Coproplasma	s__Coproplasma sp910586035
MFY42	YES	p__Pseudomonadota	c__Gammaproteobacteria	o__Enterobacterales	f__Enterobacteriaceae	g__Enterobacter	s__Enterobacter kobei
HJ11.bin.182	YES	p__Pseudomonadota	c__Alphaproteobacteria	o__UBA3830	f__UBA3830	g__	s__
RNX4.bin.86	YES	p__Bacteroidota	c__Bacteroidia	o__Bacteroidales	f__Muribaculaceae	g__UBA3263	s__
ERR3357620.bin.64	YES	p__Bacteroidota	c__Bacteroidia	o__Bacteroidales	f__Muribaculaceae	g__CAG-873	s__CAG-873 sp910578365
BV18.H.bin.16	YES	p__Bacillota_A	c__Clostridia	o__Oscillospirales	f__Ruminococcaceae	g__Ruminococcus	s__
SRR13490894.bin.68	YES	p__Elusimicrobiota	c__Elusimicrobia	o__Elusimicrobiales	f__Elusimicrobiaceae	g__Avelusimicrobium	s__
SRR14411283.bin.1	YES	p__Bacteroidota	c__Bacteroidia	o__Bacteroidales	f__P3	g__Pullibacteroides	s__
RNX5.bin.28	YES	p__Bacillota	c__Bacilli	o__Erysipelotrichales	f__Coprobacillaceae	g__MGBC140090	s__
FDSW210084434_7.bin.73	YES	p__Bacillota_A	c__Clostridia	o__Lachnospirales	f__Lachnospiraceae	g__Wujia	s__
SRR14411287.bin.19	YES	p__Bacteroidota	c__Bacteroidia	o__Bacteroidales	f__Muribaculaceae	g__Muribaculum	s__Muribaculum sp910578835
BV1.bin.30	YES	p__Bacteroidota	c__Bacteroidia	o__Bacteroidales	f__Rikenellaceae	g__Alistipes	s__
HJX5.bin.15	YES	p__Desulfobacterota	c__Desulfovibrionia	o__Desulfovibrionales	f__Desulfovibrionaceae	g__Desulfovibrio	s__
SRR21350766.bin.7	YES	p__Verrucomicrobiota	c__Verrucomicrobiae	o__Verrucomicrobiales	f__Akkermansiaceae	g__Akkermansia	s__
HJ7.bin.153	YES	p__Campylobacterota	c__Campylobacteria	o__Campylobacterales	f__Helicobacteraceae	g__Helicobacter_D	s__
RNX1.bin.78	YES	p__Bacteroidota	c__Bacteroidia	o__Bacteroidales	f__Marinifilaceae	g__Butyricimonas	s__
M13.bin.127	YES	p__Bacteroidota	c__Bacteroidia	o__Bacteroidales	f__Muribaculaceae	g__CAG-485	s__CAG-485 sp900556595
H171_2	YES	p__Bacillota	c__Bacilli	o__Paenibacillales	f__Paenibacillaceae	g__Paenibacillus_B	s__Paenibacillus_B apiarius
DF18.bin.110	YES	p__Spirochaetota	c__GWE2-31-10	o__GWE2-31-10	f__GWE2-31-10	g__RGIG8597	s__
SRR13890109.bin.3	YES	p__Pseudomonadota	c__Gammaproteobacteria	o__Pseudomonadales	f__Pseudomonadaceae	g__Pseudomonas_E	s__Pseudomonas_E lundensis
BV23.bin.116	YES	p__Bacillota_A	c__Clostridia	o__UMGS1883	f__UMGS1883	g__JAFLUQ01	s__
BVI9.bin.71	YES	p__Desulfobacterota	c__Desulfovibrionia	o__Desulfovibrionales	f__Desulfovibrionaceae	g__Desulfovibrio	s__
M9.bin.15	YES	p__Desulfobacterota	c__Desulfovibrionia	o__Desulfovibrionales	f__Desulfovibrionaceae	g__Mailhella	s__
HJ11.bin.12	YES	p__Bacteroidota	c__Bacteroidia	o__Bacteroidales	f__Muribaculaceae	g__UBA7173	s__
SRR11425449.bin.9	YES	p__Bacteroidota	c__Bacteroidia	o__Bacteroidales	f__P3	g__Pullibacteroides	s__Pullibacteroides sp014803485
SRR14411334.bin.10	YES	p__Bacteroidota	c__Bacteroidia	o__Bacteroidales	f__Muribaculaceae	g__Duncaniella	s__Duncaniella sp014801945
HJ3.bin.274	YES	p__Bacteroidota	c__Bacteroidia	o__Bacteroidales	f__Muribaculaceae	g__CAG-873	s__
SRR11425430.bin.7	YES	p__Bacillota_A	c__Clostridia	o__Lachnospirales	f__Lachnospiraceae	g__UBA3282	s__UBA3282 sp014804365
M17.bin.118	YES	p__Bacteroidota	c__Bacteroidia	o__Bacteroidales	f__Muribaculaceae	g__CAG-1031	s__CAG-1031 sp000431215
RF16.bin.87	YES	p__Campylobacterota	c__Campylobacteria	o__Campylobacterales	f__Helicobacteraceae	g__	s__
H51	YES	p__Bacteroidota	c__Bacteroidia	o__Bacteroidales	f__Bacteroidaceae	g__Bacteroides	s__
SRR11425452.bin.5	YES	p__Bacteroidota	c__Bacteroidia	o__Bacteroidales	f__P3	g__Pullibacteroides	s__Pullibacteroides sp014802725
DF17.bin.11	YES	p__Bacillota_A	c__Clostridia	o__Oscillospirales	f__Ruminococcaceae	g__CAG-115	s__
HJ19.bin.136	YES	p__Bacteroidota	c__Bacteroidia	o__Bacteroidales	f__Muribaculaceae	g__CAG-485	s__
HJ18.bin.83	YES	p__Bacteroidota	c__Bacteroidia	o__Bacteroidales	f__Muribaculaceae	g__Duncaniella	s__
HJ7.bin.134	YES	p__Bacteroidota	c__Bacteroidia	o__Bacteroidales	f__Muribaculaceae	g__Duncaniella	s__
SRR11425468.bin.10	YES	p__Campylobacterota	c__Campylobacteria	o__Campylobacterales	f__Helicobacteraceae	g__NHYN01	s__NHYN01 sp014799985
BSTS2.bin.60	YES	p__Desulfobacterota	c__Desulfovibrionia	o__Desulfovibrionales	f__Desulfovibrionaceae	g__Desulfovibrio	s__
H148	YES	p__Fusobacteriota	c__Fusobacteriia	o__Fusobacteriales	f__Fusobacteriaceae	g__Fusobacterium_A	s__Fusobacterium_A varium
RN19.bin.8	YES	p__Bacillota_C	c__Negativicutes	o__Acidaminococcales	f__Acidaminococcaceae	g__Phascolarctobacterium_A	s__Phascolarctobacterium_A sp905200645
SRR14411353.bin.1	YES	p__Bacteroidota	c__Bacteroidia	o__Bacteroidales	f__P3	g__Pullibacteroides	s__
SRR13490891.bin.15	YES	p__Bacteroidota	c__Bacteroidia	o__Bacteroidales	f__Muribaculaceae	g__CAG-873	s__
BV10.bin.83	YES	p__Bacteroidota	c__Bacteroidia	o__Bacteroidales	f__Muribaculaceae	g__CAG-873	s__
HJ14.bin.95	YES	p__Bacteroidota	c__Bacteroidia	o__Bacteroidales	f__Rikenellaceae	g__Alistipes	s__
MF88	YES	p__Bacillota	c__Bacilli	o__Lactobacillales	f__Streptococcaceae	g__Streptococcus	s__Streptococcus hyointestinalis_A
FDSW210084439_12.bin.8	YES	p__Bacillota_A	c__Clostridia	o__Lachnospirales	f__Lachnospiraceae	g__CAG-632	s__
SRR11425447.bin.30	YES	p__Bacillota_A	c__Clostridia	o__Lachnospirales	f__Lachnospiraceae	g__UBA3282	s__UBA3282 sp014804605
ERR3357615.bin.46	YES	p__Bacteroidota	c__Bacteroidia	o__Bacteroidales	f__Muribaculaceae	g__CAG-873	s__CAG-873 sp002490635
ERR3357636.bin.9	YES	p__Bacillota_A	c__Clostridia	o__Christensenellales	f__Pumilibacteraceae	g__Anaerocaecibacter	s__Anaerocaecibacter sp910578545
M3.bin.130	YES	p__Bacillota_A	c__Clostridia	o__Oscillospirales	f__Ruminococcaceae	g__Ruminococcus	s__Ruminococcus sp021769725
BV12.bin.3	YES	p__Bacteroidota	c__Bacteroidia	o__Bacteroidales	f__Muribaculaceae	g__Duncaniella	s__
SRR3997453.bin.14	YES	p__Bacteroidota	c__Bacteroidia	o__Bacteroidales	f__Muribaculaceae	g__CAG-873	s__
DF7.bin.5	YES	p__Deferribacterota	c__Deferribacteres	o__Deferribacterales	f__Mucispirillaceae	g__	s__
M7.bin.64	YES	p__Bacillota_A	c__Clostridia	o__Lachnospirales	f__Lachnospiraceae	g__Roseburia	s__Roseburia hominis_A
M5.bin.54	YES	p__Actinomycetota	c__Coriobacteriia	o__Coriobacteriales	f__Coriobacteriaceae	g__Collinsella	s__Collinsella sp900540845
SRR11425440.bin.41	YES	p__Bacteroidota	c__Bacteroidia	o__Bacteroidales	f__Muribaculaceae	g__CAG-873	s__
SRR13490895.bin.70	YES	p__Bacteroidota	c__Bacteroidia	o__Bacteroidales	f__Muribaculaceae	g__CAG-485	s__
M18.bin.38	YES	p__Actinomycetota	c__Actinomycetia	o__Actinomycetales	f__Micrococcaceae	g__Rothia	s__Rothia sp002492045
M13.bin.91	YES	p__Bacillota_A	c__Clostridia	o__Oscillospirales	f__Acutalibacteraceae	g__Eubacterium_R	s__Eubacterium_R sp014465955
HJX8.bin.8	YES	p__Bacillota_A	c__Clostridia	o__Peptostreptococcales	f__Anaerovoracaceae	g__Zhenpiania	s__
HJ18.bin.207	YES	p__Bacteroidota	c__Bacteroidia	o__Bacteroidales	f__Bacteroidaceae	g__Bacteroides	s__
BV21.bin.2	YES	p__Bacteroidota	c__Bacteroidia	o__Bacteroidales	f__Muribaculaceae	g__CAJUPY01	s__
ERR3357629.bin.14	YES	p__Bacteroidota	c__Bacteroidia	o__Bacteroidales	f__Bacteroidaceae	g__Bacteroides	s__Bacteroides sp910585845
FDSW210084442_16.bin.44	YES	p__Bacillota_A	c__Clostridia	o__Oscillospirales	f__Ruminococcaceae	g__CAKSAY01	s__
HJ6.bin.29	YES	p__Bacillota_A	c__Clostridia	o__Lachnospirales	f__Lachnospiraceae	g__UBA3282	s__
M1.bin.100	YES	p__Bacillota_A	c__Clostridia	o__Oscillospirales	f__Acutalibacteraceae	g__Ruminococcus_E	s__Ruminococcus_E sp002493635
SRR21350758.bin.27	YES	p__Verrucomicrobiota	c__Verrucomicrobiae	o__Verrucomicrobiales	f__Akkermansiaceae	g__Akkermansia	s__
RN9.bin.45	YES	p__Bacillota_A	c__Clostridia	o__Oscillospirales	f__Acutalibacteraceae	g__Eubacterium_R	s__
FDSW210084418_7MC.bin.7	YES	p__Bacillota_A	c__Clostridia	o__Oscillospirales	f__Acutalibacteraceae	g__Fimenecus	s__
HJ16.bin.199	YES	p__Bacteroidota	c__Bacteroidia	o__Bacteroidales	f__Muribaculaceae	g__Duncaniella	s__Duncaniella sp910578445
H386	YES	p__Bacillota_A	c__Clostridia	o__Clostridiales	f__Clostridiaceae	g__Clostridium_J	s__
S7.bin.24	YES	p__Bacillota	c__Bacilli	o__Lactobacillales	f__Streptococcaceae	g__Streptococcus	s__Streptococcus sp004570525
SRR23368219.bin.20	YES	p__Bacillota_A	c__Clostridia	o__Oscillospirales	f__Acutalibacteraceae	g__Ruminococcus_E	s__
SRR11425449.bin.22	YES	p__Bacteroidota	c__Bacteroidia	o__Bacteroidales	f__Muribaculaceae	g__CAG-485	s__CAG-485 sp014802625
M8.bin.81	YES	p__Spirochaetota	c__Spirochaetia	o__JAFGXN01	f__CALXOJ01	g__CALXOJ01	s__
M8.bin.5	YES	p__Bacteroidota	c__Bacteroidia	o__Bacteroidales	f__Paludibacteraceae	g__RF16	s__
RNX8.bin.106	YES	p__Actinomycetota	c__Coriobacteriia	o__Coriobacteriales	f__Eggerthellaceae	g__D16-34	s__
SRR14411285.bin.23	YES	p__Bacteroidota	c__Bacteroidia	o__Bacteroidales	f__Muribaculaceae	g__CAG-873	s__
RF3.bin.7	YES	p__Campylobacterota	c__Campylobacteria	o__Campylobacterales	f__Helicobacteraceae	g__Helicobacter_C	s__Helicobacter_C japonicus
RNX3.bin.34	YES	p__Bacillota_A	c__Clostridia	o__Oscillospirales	f__Acutalibacteraceae	g__Fimenecus	s__
HXJS2.bin.30	YES	p__Bacteroidota	c__Bacteroidia	o__Bacteroidales	f__Muribaculaceae	g__CAG-485	s__
RNX6.bin.88	YES	p__Verrucomicrobiota	c__Verrucomicrobiae	o__Opitutales	f__CAG-312	g__UMGS1490	s__UMGS1490 sp900547395
SRR21350685.bin.14	YES	p__Bacillota_A	c__Clostridia	o__Lachnospirales	f__Lachnospiraceae	g__RGIG3040	s__RGIG3040 sp023664735
RNX4.bin.95	YES	p__Campylobacterota	c__Campylobacteria	o__Campylobacterales	f__Helicobacteraceae	g__Helicobacter_D	s__Helicobacter_D rodentium
M17.bin.105	YES	p__Bacillota	c__Bacilli	o__Lactobacillales	f__Lactobacillaceae	g__Limosilactobacillus	s__Limosilactobacillus reuteri
BSTS7.bin.11	YES	p__Bacillota_A	c__Clostridia	o__Lachnospirales	f__Lachnospiraceae	g__Eubacterium_F	s__
SRR11425436.bin.8	YES	p__Bacteroidota	c__Bacteroidia	o__Bacteroidales	f__Muribaculaceae	g__CAJUPY01	s__
HJX3.bin.39	YES	p__Bacillota_A	c__Clostridia	o__Peptostreptococcales	f__Anaerovoracaceae	g__Zhenpiania	s__
M19.bin.36	YES	p__Bacillota_A	c__Clostridia	o__Lachnospirales	f__Lachnospiraceae	g__Lachnoclostridium_B	s__
RF17.bin.134	YES	p__Bacillota_A	c__Clostridia	o__Oscillospirales	f__Ruminococcaceae	g__Ruminococcus	s__Ruminococcus sp017622635
ERR3357642.bin.23	YES	p__Bacteroidota	c__Bacteroidia	o__Bacteroidales	f__Tannerellaceae	g__Parabacteroides	s__Parabacteroides sp910577325
HJ1.bin.119	YES	p__Actinomycetota	c__Coriobacteriia	o__Coriobacteriales	f__Eggerthellaceae	g__D16-34	s__
ERR3357640.bin.98	YES	p__Bacteroidota	c__Bacteroidia	o__Bacteroidales	f__Muribaculaceae	g__Duncaniella	s__Duncaniella muris
M8.bin.70	YES	p__Bacillota_A	c__Clostridia	o__Tissierellales	f__Peptoniphilaceae	g__Gallicola	s__Gallicola sp012798975
BVI9.bin.29	YES	p__Bacteroidota	c__Bacteroidia	o__Bacteroidales	f__P3	g__Pullibacteroides	s__
HJX5.bin.62	YES	p__Bacillota_A	c__Clostridia	o__Lachnospirales	f__Lachnospiraceae	g__UBA3282	s__
RN2.bin.97	YES	p__Actinomycetota	c__Actinomycetia	o__Actinomycetales	f__Micrococcaceae	g__Kocuria	s__
FDSW210084429_2.bin.17	YES	p__Bacillota_A	c__Clostridia	o__Oscillospirales	f__Oscillospiraceae	g__Enterenecus	s__
SRR21474236.bin.58	YES	p__Bacillota_A	c__Clostridia	o__Christensenellales	f__Pumilibacteraceae	g__Anaerocaecibacter	s__
RN12.bin.7	YES	p__Bacillota	c__Bacilli	o__Staphylococcales	f__Staphylococcaceae	g__Staphylococcus	s__Staphylococcus kloosii
RN17.bin.87	YES	p__Bacillota_A	c__Clostridia	o__Peptostreptococcales	f__Anaerovoracaceae	g__RGIG7179	s__
SRR14411330.bin.8	YES	p__Bacillota_A	c__Clostridia	o__Oscillospirales	f__Ruminococcaceae	g__CAG-115	s__
RNX5.bin.84	YES	p__Bacteroidota	c__Bacteroidia	o__Bacteroidales	f__UBA932	g__Cryptobacteroides	s__
ERR3357639.bin.6	YES	p__Bacteroidota	c__Bacteroidia	o__Bacteroidales	f__Muribaculaceae	g__CAG-873	s__CAG-873 sp011959565
SRR11425443.bin.61	YES	p__Bacteroidota	c__Bacteroidia	o__Bacteroidales	f__Marinifilaceae	g__Odoribacter	s__
SRR13490896.bin.84	YES	p__Desulfobacterota	c__Desulfovibrionia	o__Desulfovibrionales	f__Desulfovibrionaceae	g__Bilophila	s__
H587_2	YES	p__Bacillota_A	c__Clostridia	o__Peptostreptococcales	f__Peptostreptococcaceae	g__Clostridioides_A	s__Clostridioides_A sp002390935
SRR13490889.bin.30	YES	p__Bacillota_A	c__Clostridia	o__Lachnospirales	f__Lachnospiraceae	g__UBA7109	s__
HXJS2.bin.104	YES	p__Bacteroidota	c__Bacteroidia	o__Bacteroidales	f__Rikenellaceae	g__Alistipes	s__
M18.bin.87	YES	p__Actinomycetota	c__Coriobacteriia	o__Coriobacteriales	f__QAMH01	g__QAMH01	s__
BSTS2.bin.4	YES	p__Bacillota_A	c__Clostridia	o__Oscillospirales	f__Ruminococcaceae	g__Ruminiclostridium_E	s__
HJ18.bin.203	YES	p__Bacteroidota	c__Bacteroidia	o__Bacteroidales	f__Rikenellaceae	g__Alistipes	s__
RF14.bin.13	YES	p__Fusobacteriota	c__Fusobacteriia	o__Fusobacteriales	f__Fusobacteriaceae	g__Fusobacterium_A	s__Fusobacterium_A sp900543175
BV22.bin.137	YES	p__Bacteroidota	c__Bacteroidia	o__Bacteroidales	f__Muribaculaceae	g__JAJPXC01	s__
FDSW210084439_12.bin.43	YES	p__Verrucomicrobiota	c__Verrucomicrobiae	o__Verrucomicrobiales	f__Akkermansiaceae	g__Akkermansia	s__
SRR23368206.bin.81	YES	p__Bacillota_A	c__Clostridia	o__Oscillospirales	f__Acutalibacteraceae	g__Fimenecus	s__
SRR23368200.bin.72	YES	p__Bacteroidota	c__Bacteroidia	o__Bacteroidales	f__Tannerellaceae	g__Parabacteroides	s__Parabacteroides merdae
H174	YES	p__Bacillota	c__Bacilli	o__Paenibacillales	f__Paenibacillaceae	g__Paenibacillus	s__Paenibacillus sp002573715
MF12.bin.131	YES	p__Bacillota_A	c__Clostridia	o__Oscillospirales	f__Ruminococcaceae	g__CAG-115	s__
SRR13490889.bin.82	YES	p__Bacillota_B	c__Dehalobacteriia	o__UBA4068	f__UBA5755	g__Avidehalobacter	s__
SRR21474234.bin.71	YES	p__Bacillota_A	c__Clostridia	o__Lachnospirales	f__Lachnospiraceae	g__Velocimicrobium	s__
SRR14411297.bin.12	YES	p__Bacteroidota	c__Bacteroidia	o__Bacteroidales	f__Muribaculaceae	g__Paramuribaculum	s__Paramuribaculum sp014800945
ERR3357643.bin.43	YES	p__Bacteroidota	c__Bacteroidia	o__Bacteroidales	f__Muribaculaceae	g__Duncaniella	s__Duncaniella dubosii
BSTS10.bin.34	YES	p__Desulfobacterota	c__Desulfovibrionia	o__Desulfovibrionales	f__Desulfovibrionaceae	g__Desulfovibrio	s__
SRR23368217.bin.65	YES	p__Bacillota_A	c__Clostridia	o__Christensenellales	f__Borkfalkiaceae	g__Coproplasma	s__
RF10.bin.149	YES	p__Bacillota_A	c__Clostridia	o__Lachnospirales	f__Lachnospiraceae	g__Anaerostipes	s__Anaerostipes hadrus
RN18.bin.134	YES	p__Bacillota_A	c__Clostridia	o__Oscillospirales	f__Acutalibacteraceae	g__Eubacterium_R	s__
SRR14411284.bin.8	YES	p__Bacteroidota	c__Bacteroidia	o__Bacteroidales	f__Muribaculaceae	g__Muribaculum	s__Muribaculum sp001701195
SRR23368204.bin.72	YES	p__Bacteroidota	c__Bacteroidia	o__Bacteroidales	f__Muribaculaceae	g__CAG-485	s__
MF14.bin.83	YES	p__Verrucomicrobiota	c__Verrucomicrobiae	o__Opitutales	f__UBA9783	g__	s__
SRR14411294.bin.1	YES	p__Bacteroidota	c__Bacteroidia	o__Bacteroidales	f__Bacteroidaceae	g__Prevotella	s__
RNX5.bin.48	YES	p__Deferribacterota	c__Deferribacteres	o__Deferribacterales	f__Mucispirillaceae	g__Mucispirillum	s__Mucispirillum sp944324465
FDSW210084433_6.bin.82	YES	p__Bacillota_A	c__Clostridia	o__Oscillospirales	f__Ruminococcaceae	g__CAG-115	s__
SRR23368216.bin.44	YES	p__Bacillota_A	c__Clostridia	o__Oscillospirales	f__Acutalibacteraceae	g__Eubacterium_R	s__
RN18.bin.115	YES	p__Actinomycetota	c__Coriobacteriia	o__Coriobacteriales	f__Coriobacteriaceae	g__Collinsella	s__Collinsella sp003466125
S9.bin.30	YES	p__Desulfobacterota	c__Desulfovibrionia	o__Desulfovibrionales	f__Desulfovibrionaceae	g__	s__
BV13.bin.88	YES	p__Bacillota_A	c__Clostridia	o__Lachnospirales	f__Lachnospiraceae	g__Wujia	s__
SRR23368203.bin.18	YES	p__Bacillota_A	c__Clostridia	o__Christensenellales	f__Borkfalkiaceae	g__Coproplasma	s__
SRR11425447.bin.16	YES	p__Bacteroidota	c__Bacteroidia	o__Bacteroidales	f__Muribaculaceae	g__Paramuribaculum	s__Paramuribaculum sp014802045
ERR3357641.bin.62	YES	p__Bacillota_A	c__Clostridia	o__Lachnospirales	f__Lachnospiraceae	g__Acetatifactor	s__Acetatifactor sp910586775
RF18.bin.52	YES	p__Bacillota_A	c__Clostridia	o__Oscillospirales	f__Acutalibacteraceae	g__CAG-217	s__CAG-217 sp000436335
HJ19.bin.194	YES	p__Bacteroidota	c__Bacteroidia	o__Bacteroidales	f__Muribaculaceae	g__CAG-873	s__
SRR10605906.bin.45	YES	p__Bacillota_A	c__Clostridia	o__Oscillospirales	f__Ruminococcaceae	g__Ruminiclostridium_E	s__
RNX6.bin.43	YES	p__Bacteroidota	c__Bacteroidia	o__Bacteroidales	f__Bacteroidaceae	g__	s__
DF17.bin.57	YES	p__Bacillota_A	c__Clostridia	o__Oscillospirales	f__Ruminococcaceae	g__CAG-115	s__
HJ13.bin.91	YES	p__Bacteroidota	c__Bacteroidia	o__Bacteroidales	f__Muribaculaceae	g__CAG-485	s__
SRR21474239.bin.109	YES	p__Bacillota_A	c__Clostridia	o__Oscillospirales	f__Ruminococcaceae	g__CAG-353	s__
ERR3357628.bin.70	YES	p__Bacillota_A	c__Clostridia	o__Oscillospirales	f__Acutalibacteraceae	g__Eubacterium_R	s__Eubacterium_R sp011958665
SRR14411323.bin.14	YES	p__Bacteroidota	c__Bacteroidia	o__Bacteroidales	f__Muribaculaceae	g__CAG-485	s__
MF17.bin.51	YES	p__Bacillota_A	c__Clostridia	o__Christensenellales	f__Borkfalkiaceae	g__Coproplasma	s__
SRR11425463.bin.16	YES	p__Bacteroidota	c__Bacteroidia	o__Bacteroidales	f__P3	g__Pullibacteroides	s__Pullibacteroides sp014802725
H24	YES	p__Bacillota_A	c__Clostridia	o__Clostridiales	f__Clostridiaceae	g__Clostridium	s__Clostridium sartagoforme_A
SRR21350685.bin.11	YES	p__Bacteroidota	c__Bacteroidia	o__Bacteroidales	f__Muribaculaceae	g__Amulumruptor	s__
DF18.bin.30	YES	p__Bacillota_A	c__Clostridia	o__Oscillospirales	f__Ruminococcaceae	g__CAG-115	s__
H368	YES	p__Bacillota	c__Bacilli	o__Lactobacillales	f__Enterococcaceae	g__Enterococcus_D	s__Enterococcus_D innesii
HJ13.bin.146	YES	p__Bacillota_A	c__Clostridia	o__Lachnospirales	f__Lachnospiraceae	g__JAAVZI01	s__
SRR21350762.bin.6	YES	p__Bacteroidota	c__Bacteroidia	o__Bacteroidales	f__Muribaculaceae	g__UBA3263	s__
MF18.bin.60	YES	p__Deferribacterota	c__Deferribacteres	o__Deferribacterales	f__Mucispirillaceae	g__	s__
HJ8.bin.88	YES	p__Bacteroidota	c__Bacteroidia	o__Bacteroidales	f__Muribaculaceae	g__Muribaculum	s__Muribaculum sp910578835
RF6.bin.48	YES	p__Actinomycetota	c__Coriobacteriia	o__Coriobacteriales	f__Eggerthellaceae	g__W1P20-047	s__
M10.bin.104	YES	p__Bacteroidota	c__Bacteroidia	o__Bacteroidales	f__Paludibacteraceae	g__Aphodosoma	s__
S2.bin.19	YES	p__Deferribacterota	c__Deferribacteres	o__Deferribacterales	f__Mucispirillaceae	g__Mucispirillum	s__
FDSW210084435_8.bin.96	YES	p__Bacillota_A	c__Clostridia	o__Oscillospirales	f__Acutalibacteraceae	g__Fimenecus	s__
FDSW210084437_10.bin.53	YES	p__Bacillota_A	c__Clostridia	o__Lachnospirales	f__Lachnospiraceae	g__RGIG6919	s__
SRR21350757.bin.11	YES	p__Bacteroidota	c__Bacteroidia	o__Bacteroidales	f__Muribaculaceae	g__CAG-485	s__
M13.bin.59	YES	p__Bacteroidota	c__Bacteroidia	o__Bacteroidales	f__Muribaculaceae	g__CAG-873	s__CAG-873 sp017621845
SRR13490888.bin.52	YES	p__Elusimicrobiota	c__Elusimicrobia	o__Elusimicrobiales	f__Elusimicrobiaceae	g__UBA1436	s__
M13.bin.16	YES	p__Desulfobacterota	c__Desulfovibrionia	o__Desulfovibrionales	f__Desulfovibrionaceae	g__Lawsonia	s__Lawsonia intracellularis
SRR11425455.bin.3	YES	p__Spirochaetota	c__Spirochaetia	o__Treponematales	f__Treponemataceae	g__Treponema_D	s__Treponema_D sp014804005
BSTS8.bin.96	YES	p__Bacteroidota	c__Bacteroidia	o__Bacteroidales	f__Muribaculaceae	g__CAG-485	s__
HJ8.bin.60	YES	p__Bacteroidota	c__Bacteroidia	o__Bacteroidales	f__Muribaculaceae	g__Muribaculum	s__Muribaculum sp910578785
G1.bin.30	YES	p__Actinomycetota	c__Actinomycetia	o__Mycobacteriales	f__Mycobacteriaceae	g__Rhodococcus	s__Rhodococcus sp012844225
HJX5.bin.5	YES	p__Bacillota_A	c__Clostridia	o__Oscillospirales	f__Acutalibacteraceae	g__Eubacterium_R	s__
MF4.bin.105	YES	p__Bacteroidota	c__Bacteroidia	o__Bacteroidales	f__Muribaculaceae	g__CAG-873	s__
SRR14411285.bin.8	YES	p__Bacillota_A	c__Clostridia	o__Lachnospirales	f__Lachnospiraceae	g__CAG-603	s__CAG-603 sp910583605
RF19.bin.118	YES	p__Bacillota_A	c__Clostridia	o__Lachnospirales	f__Lachnospiraceae	g__Dorea	s__Dorea formicigenerans
SRR6032586.bin.15	YES	p__Bacillota_A	c__Clostridia	o__Lachnospirales	f__Lachnospiraceae	g__Butyribacter	s__Butyribacter sp910579085
H265	YES	p__Pseudomonadota	c__Gammaproteobacteria	o__Enterobacterales	f__Enterobacteriaceae	g__Serratia	s__Serratia ureilytica
SRR14411279.bin.6	YES	p__Bacteroidota	c__Bacteroidia	o__Bacteroidales	f__Muribaculaceae	g__CAG-485	s__CAG-485 sp014800895
BV14.H.bin.104	YES	p__Desulfobacterota	c__Desulfovibrionia	o__Desulfovibrionales	f__Desulfovibrionaceae	g__Desulfovibrio	s__
HJ14.bin.213	YES	p__Bacillota_A	c__Clostridia	o__Christensenellales	f__Pumilibacteraceae	g__Anaerocaecibacter	s__
BV4.bin.64	YES	p__Bacteroidota	c__Bacteroidia	o__Bacteroidales	f__Muribaculaceae	g__CAG-485	s__
HJ17.bin.179	YES	p__Bacteroidota	c__Bacteroidia	o__Bacteroidales	f__Muribaculaceae	g__Duncaniella	s__Duncaniella sp910578445
H894	YES	p__Bacillota	c__Bacilli	o__Lactobacillales	f__Enterococcaceae	g__Enterococcus_D	s__Enterococcus_D innesii
SRR11425433.bin.16	YES	p__Bacteroidota	c__Bacteroidia	o__Bacteroidales	f__P3	g__Pullibacteroides	s__Pullibacteroides sp014802725
HJ9.bin.126	YES	p__Bacillota_A	c__Clostridia	o__Lachnospirales	f__Lachnospiraceae	g__14-2	s__
HM409_1	YES	p__Bacillota	c__Bacilli	o__Lactobacillales	f__Enterococcaceae	g__Enterococcus_A	s__Enterococcus_A avium
M7.bin.55	YES	p__Bacillota	c__Bacilli	o__Lactobacillales	f__Lactobacillaceae	g__Lacticaseibacillus	s__Lacticaseibacillus saniviri
BV10.bin.102	YES	p__Bacillota_A	c__Clostridia	o__Oscillospirales	f__Ruminococcaceae	g__CAG-115	s__
SRR13490896.bin.117	YES	p__Cyanobacteriota	c__Vampirovibrionia	o__Gastranaerophilales	f__RUG14156	g__RUG14156	s__
HZ180	YES	p__Pseudomonadota	c__Gammaproteobacteria	o__Burkholderiales	f__Burkholderiaceae_C	g__Alcaligenes	s__Alcaligenes faecalis
BV17.H.bin.85	YES	p__Bacillota_A	c__Clostridia	o__Oscillospirales	f__Acutalibacteraceae	g__Fimenecus	s__
HJ11.bin.49	YES	p__Bacillota_A	c__Clostridia	o__Lachnospirales	f__Lachnospiraceae	g__Eubacterium_F	s__
H130	YES	p__Pseudomonadota	c__Gammaproteobacteria	o__Pseudomonadales	f__Moraxellaceae	g__Acinetobacter	s__Acinetobacter junii
BV6.H.bin.37	YES	p__Bacillota_A	c__Clostridia	o__Oscillospirales	f__Ruminococcaceae	g__UBA3855	s__
SRR9205132.bin.80	YES	p__Bacillota_A	c__Clostridia	o__Oscillospirales	f__Ruminococcaceae	g__CAG-115	s__CAG-115 sp910587465
SRR23368202.bin.14	YES	p__Bacillota_A	c__Clostridia	o__Lachnospirales	f__Lachnospiraceae	g__Roseburia	s__
SRR21350752.bin.15	YES	p__Bacteroidota	c__Bacteroidia	o__Bacteroidales	f__Muribaculaceae	g__JAGBWK01	s__
RN7.bin.89	YES	p__Bacillota	c__Bacilli	o__Lactobacillales	f__Streptococcaceae	g__Streptococcus	s__
HXJS2.bin.85	YES	p__Desulfobacterota	c__Desulfovibrionia	o__Desulfovibrionales	f__Desulfovibrionaceae	g__Mailhella	s__Mailhella sp910578585
H1403_1	YES	p__Pseudomonadota	c__Gammaproteobacteria	o__Enterobacterales	f__Enterobacteriaceae	g__Escherichia	s__Escherichia coli
BSTS14.bin.137	YES	p__Bacillota_A	c__Clostridia	o__Oscillospirales	f__Ruminococcaceae	g__CAG-115	s__
SRR23368206.bin.68	YES	p__Bacillota_C	c__Negativicutes	o__Selenomonadales	f__	g__	s__
HXJS1.bin.21	YES	p__Bacteroidota	c__Bacteroidia	o__Bacteroidales	f__Bacteroidaceae	g__Prevotella	s__
MF4.bin.44	YES	p__Bacteroidota	c__Bacteroidia	o__Bacteroidales	f__P3	g__Pullibacteroides	s__
ERR3357633.bin.51	YES	p__Bacillota_A	c__Clostridia	o__Lachnospirales	f__Lachnospiraceae	g__VSOB01	s__VSOB01 sp910589075
HJ12.bin.112	YES	p__Bacteroidota	c__Bacteroidia	o__Bacteroidales	f__Muribaculaceae	g__JAFLTL01	s__
SRR11425441.bin.4	YES	p__Cyanobacteriota	c__Vampirovibrionia	o__Gastranaerophilales	f__Gastranaerophilaceae	g__Zag111	s__Zag111 sp014803505
SRR14411251.bin.30	YES	p__Bacteroidota	c__Bacteroidia	o__Bacteroidales	f__Muribaculaceae	g__UBA3263	s__UBA3263 sp002490725
HZ183_2	YES	p__Pseudomonadota	c__Gammaproteobacteria	o__Burkholderiales	f__Burkholderiaceae_C	g__Achromobacter	s__Achromobacter xylosoxidans_C
M18.bin.33	YES	p__Bacillota	c__Bacilli	o__Lactobacillales	f__Lactobacillaceae	g__Limosilactobacillus	s__Limosilactobacillus reuteri
SRR11425454.bin.16	YES	p__Bacillota_A	c__Clostridia	o__Oscillospirales	f__Ruminococcaceae	g__Ruminococcus	s__Ruminococcus sp014799765
M4.bin.44	YES	p__Bacillota_A	c__Clostridia	o__Lachnospirales	f__Lachnospiraceae	g__1XD8-76	s__
DF7.bin.38	YES	p__Bacteroidota	c__Bacteroidia	o__Bacteroidales	f__Muribaculaceae	g__CAG-873	s__
MF10.bin.98	YES	p__Bacillota_A	c__Clostridia	o__Christensenellales	f__Pumilibacteraceae	g__Anaerocaecibacter	s__
SRR14411255.bin.2	YES	p__Bacteroidota	c__Bacteroidia	o__Bacteroidales	f__Muribaculaceae	g__CAG-485	s__
[truncated: 2,818 more rows]

## Sheet: Supplementary Table 4
Supplementary Table 4.Genomic statistics and vitamin synthesis capabilities of 2,307 selected genomes, highlighting key features and biosynthetic potential.
[truncated: 2,308 more rows]
