# Supplementary figures and images for: Gut microbiota response to Enterocytozoon bieneusi infection: enhanced vitamin B and K 2 pathways
Source: Research Square preprint supplement (doi:10.21203/rs.3.rs-7835059/v1), 2025-11-26

(A)

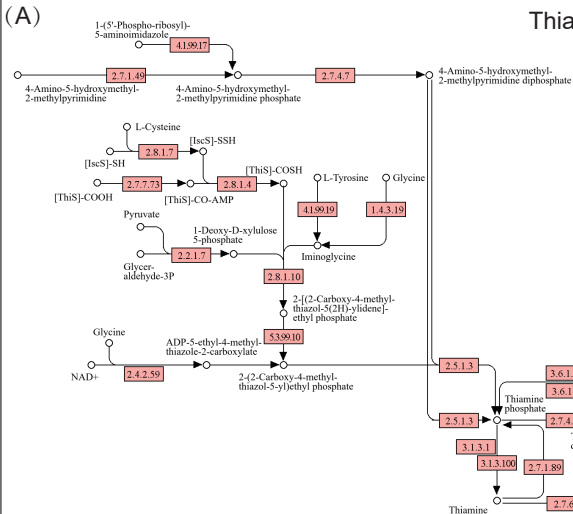

(B)

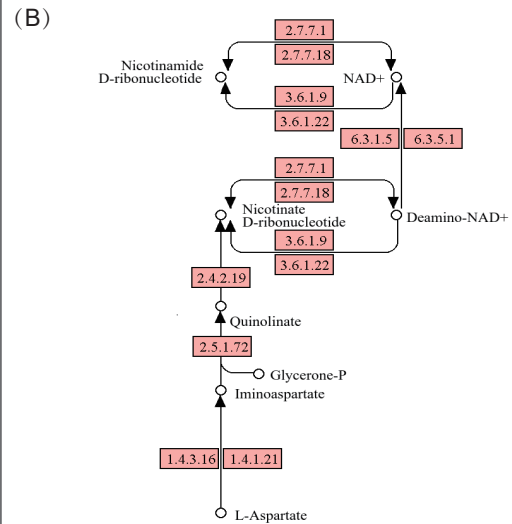

## Thiamine

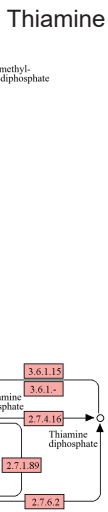

(C)

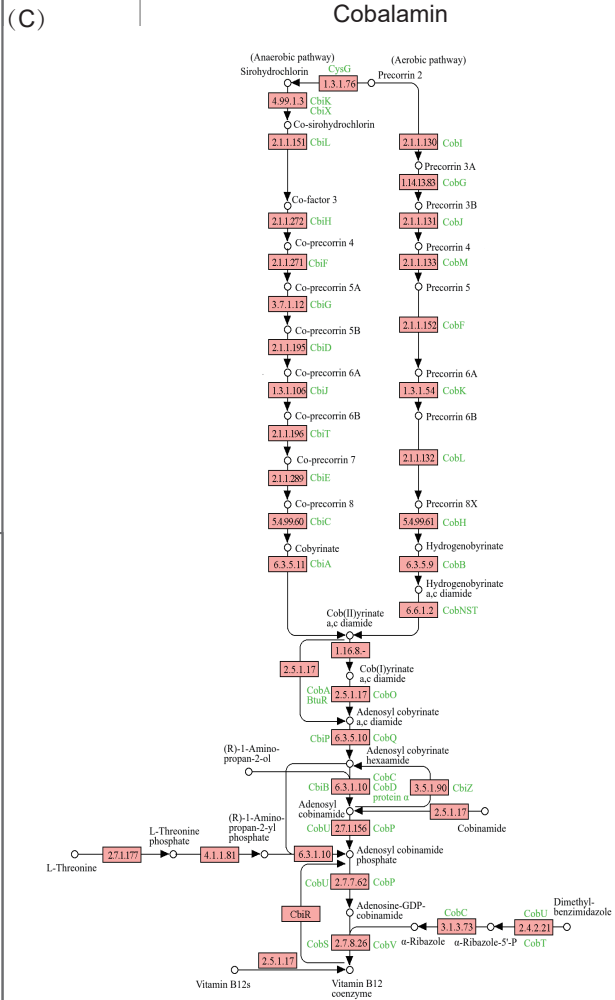

Supplement: Supplementary file 1 [file eb3ccc0159b6ccad640e2a5d.pdf]
